# Supplementary material for: Egr2 Upregulation Induced Mitochondrial Iron Overload Implicating in Cognitive Deficits after Sevoflurane Administration
Source: Research Square preprint supplement (doi:10.21203/rs.3.rs-104467/v1), 2020-11-13
Supplement: Supplementary file 1 [file 2a59cd804bd8857f84f4b299.csv]

		Cluster	P30con1	P30con2	P30con3	P30sev1	P30sev2	P30sev3	P6con1	P6con2	P6con3	P6sev1	P6sev2	P6sev3
ENSMUSG00000024501	Dpysl3	A	-2.49757468005905	-2.37266093903503	-2.49729757937549	-2.35582273912089	-2.64752437941567	-2.45862286590289	2.48346758773597	2.46698081471704	2.50559910075494	2.47602345211546	2.35185412249218	2.54557810509343
ENSMUSG00000104953	Gm47308	A	-1.38572616202289	-1.36439598454146	-1.38420205888143	-1.34739506338193	-1.34141005448905	3.34266631094238	-1.35973120758491	-1.36554729193858	-1.41269940699626	4.54349888760128	-1.38162328633568	4.45656531762852
ENSMUSG00000107062	Gm43580	A	-0.118418746943645	-2.64832240400576	-2.40931313647312	0.252112698359715	0.317162338179092	-2.05140894645483	2.96783066256339	2.73680711450154	2.91301515411347	-2.34290966839486	2.78446352625263	-2.40101859169762
ENSMUSG00000047139	Cd24a	A	-2.14361286991444	-1.88413194616826	-2.38425962685904	-2.03352226540074	-2.31268898610862	-2.09795667086405	1.99576241729003	2.24404187720592	2.11142586405871	2.06697283291799	2.06178627259061	2.37618310125189
ENSMUSG00000019874	Fabp7	A	-2.23504336903073	-2.14383662646959	-2.85553383723932	-2.03271902596029	-1.6793543306431	-1.80084144448418	2.06259536475574	2.28975698850859	2.20323435406283	2.07759284671714	1.85256909681058	2.26157998297234
ENSMUSG00000036913	Trim67	A	-2.09939354033971	-2.21201049918115	-2.29468489775662	-2.15099296679031	-2.02955455913024	-2.03405294641636	2.09276665620355	2.13292791871637	2.09357880406744	2.1961154995915	1.97384784542764	2.33145268560788
ENSMUSG00000022865	Cxadr	A	-2.21245601111432	-1.93542376644481	-2.06558556245428	-2.10959740631858	-2.02976365021604	-2.22894206128376	2.10623475859085	2.0515502134837	2.21769507511921	2.07401961970185	1.9818672544671	2.15040153646908
ENSMUSG00000025789	St8sia2	A	-2.1372330656817	-2.04003856710236	-1.9832661058746	-1.99809780387501	-2.14267791482473	-2.08511935420885	2.12338090539412	2.23458812112162	1.90917473186555	1.84706924578595	1.95338474712055	2.31883506027948
ENSMUSG00000042834	Nrep	A	-2.03505287858453	-1.95117886237895	-2.07971739842	-1.98802504558791	-1.98434676278297	-2.08771034974284	2.12073884056476	2.15693481159787	1.93727254776882	1.89110429266875	1.9065467315905	2.11343407330649
ENSMUSG00000031285	Dcx	A	-2.04620054808116	-1.94576475483369	-2.07240991010231	-1.98416733716054	-1.98012273565894	-1.95763710638239	1.90707518501941	1.96731003494971	2.10843806836761	2.03343835622414	1.79870424395112	2.17133650370704
ENSMUSG00000064365	mt-Ts2	A	-3.20407443554987	1.59777295653608	-3.23125348253352	1.70702259756378	1.23771441719979	-3.05668037038988	1.05111306653169	0.743815136519712	1.20662469246489	0.661303219405554	0.732985793960433	0.553656408291344
ENSMUSG00000064220	Hist2h2aa1	A	1.5603755108171	1.80437479152673	-3.03364476993988	1.91418280446125	-3.03364476993988	-3.03364476993988	0.886360057714557	0.103681193028193	0.721663083001447	0.950583177873775	0.647677424666414	0.512036266730158
ENSMUSG00000018012	Rac3	A	-1.55590121150481	-1.87258705141627	-1.79753813626805	-1.57225449286893	-2.06917349332772	-1.80760721857239	1.72898845197457	1.96447890014292	1.72494447033511	1.66931276589647	1.74659775862341	1.84073925698569
ENSMUSG00000092074	Dynlt1a	A	-1.02814121948308	-1.45818247708587	-1.99844800737994	-2.19582070244984	-1.67772989927453	-2.0892696256348	1.7169289413062	1.92948014643445	1.79151852669205	1.7475612170009	1.66512358770833	1.59697951216613
ENSMUSG00000019890	Nts	A	-2.15998343698042	-1.79379838100791	-1.91372413581039	-1.58568537087114	-1.54156813885549	-1.03760396387605	1.72419449367198	1.82363294494807	1.58167585216915	1.44099584084174	1.51173391808505	1.95013037768541
ENSMUSG00000084728	Mir1905	A	-1.94953010582163	-1.57133871636138	-1.66750190816722	-1.81144438799547	-1.09069136035827	-1.8842726234468	1.51253733461306	1.71567363162376	1.60957508933355	1.78715957674018	1.41687253335275	1.93296093648747
ENSMUSG00000098743	Gm27927	A	-0.75498542439209	-0.75498542439209	-0.75498542439209	-0.75498542439209	-0.75498542439209	-0.67521889187038	3.57270538845324	-0.75498542439209	-0.75498542439209	-0.75498542439209	-0.75498542439209	3.89738232294595
ENSMUSG00000029005	Draxin	A	-1.52719708784638	-1.63664417655544	-1.55888493020791	-1.65254569607236	-1.73563941917666	-1.80714871586865	1.56324540718752	1.78769904613965	1.63700039698431	1.65715862384895	1.39159780305146	1.88135874851551
ENSMUSG00000031628	Casp3	A	-1.51866154811916	-1.53302359321954	-1.41950313003161	-1.7593813023702	-1.56920806894359	-1.8513795638447	1.53084280701203	1.74137534431144	1.54616359693338	1.53693866493296	1.47161369500123	1.82422309833776
ENSMUSG00000045136	Tubb2b	A	-1.40958307389053	-1.63629364660981	-1.38454434975742	-1.80645635722533	-1.6415469422303	-1.5733859956681	1.55872906216	1.64933454787523	1.48740440912503	1.57112247901888	1.50381576232441	1.68140410487794
ENSMUSG00000103585	Pcdhgb4	A	-1.05099894534463	-0.551235788043277	-0.458082538180985	-0.83049753333468	-0.821897802687467	-0.944655185211319	3.77175304918664	-0.325352276030504	3.19707907137194	-0.4672846444271	-0.844786820097543	-0.67404058720108
ENSMUSG00000035551	Igfbpl1	A	-1.50925271391832	-1.26131909934412	-1.29399349488776	-1.83820740556971	-1.50203733201801	-1.84596563022951	1.3355861197255	1.54097386989784	1.6115388464144	1.72251477750465	1.31032895528395	1.72983310714109
ENSMUSG00000023036	Pcdhgc4	A	-1.91817551558866	0.383720523197117	0.459115403792612	-0.589400885413552	-2.06616606430959	-2.13111479574244	-0.659297549180013	-0.66846599439241	1.29609195723333	2.13464280399003	1.12112740674695	2.63792270966661
ENSMUSG00000098816	Gm27786	A	-1.66381488288213	-1.3140147495897	-1.52815231197474	-1.22871611165205	-1.3205061999121	-1.73028162244484	2.03279409857442	0.0773490341133674	1.67858957830511	1.86236030714362	1.71153407431422	1.42285878600481
ENSMUSG00000029168	Dpysl5	A	-1.57331718394373	-1.42753291226041	-1.73249771115653	-1.41380392064556	-1.60189985350925	-1.33510266770855	1.52499011959469	1.54785783979101	1.55270175534949	1.55452403871457	1.35454569166193	1.54953480411235
ENSMUSG00000028364	Tnc	A	-1.3952064636884	-1.35573430040757	-1.41113059539676	-1.74278216873635	-1.48422366375122	-1.58715406369628	1.49543601538179	1.54661388333661	1.67845373746038	1.50795948978415	1.14161135479459	1.60615677491905
ENSMUSG00000086503	Xist	A	-0.687106415617028	-0.67275371196455	-0.68671601049796	-0.695911478048392	-0.670831829918414	-0.584723844627814	3.19408759181637	-0.641650472341012	-0.686182908944852	-0.680704949597329	-0.678443357040041	3.49093738678102
ENSMUSG00000044338	Aplnr	A	-1.09980677384157	-1.25945961303313	-1.54781316554964	-1.60418997543952	-1.69985148140275	-1.48916356009109	1.43471633994383	1.31396487822593	1.66881083247824	1.33334251587036	1.42958067139354	1.51986933144579
ENSMUSG00000102440	Pcdhga9	A	-1.14721394072934	0.190668769232786	-0.847140376913276	-1.0796133423616	-0.476740930401366	-0.826635481181893	-0.312605467665411	4.20909414651197	-0.714479317839445	-0.737917880327902	1.30572344981797	0.4368603718575
ENSMUSG00000041642	Kif21b	A	-1.53751843057468	-1.49521365418841	-1.49964285416418	-1.26602505557765	-1.42808674111959	-1.39484776454678	1.54290138446857	1.34752969147983	1.49014501317445	1.49239097852651	1.30628086233304	1.44208657018888
ENSMUSG00000047945	Marcksl1	A	-1.17894666635617	-1.52746480104464	-1.36856484380889	-1.54219203784668	-1.46165671149493	-1.52538037073279	1.41713073659589	1.60309810503874	1.36017067694836	1.28216399642218	1.40181587097975	1.53982604529918
ENSMUSG00000094392	Gm3788	A	-1.45215226381456	-1.59059088611758	-1.22233974470468	-0.79812265740943	-1.9958021544161	-1.32584735962943	1.35412553926	1.7543209815297	1.47023105250854	0.852989787497573	1.62103710912242	1.33215059617354
ENSMUSG00000041362	Shtn1	A	-1.26589207594005	-1.01353792282165	-1.66220996611483	-1.69322915273218	-1.45136323291683	-1.42003707327661	1.39075306471068	1.40366861480715	1.39913013759651	1.36150503794525	1.32470848041149	1.62650408833106
ENSMUSG00000079523	Tmsb10	A	-1.41798550421856	-1.40718714823267	-1.46859816616954	-1.42476158753978	-1.46509591427525	-1.24589620672979	1.46894704854777	1.69121406522933	1.34718335766631	1.1981044687587	1.28142180642195	1.44265378054153
ENSMUSG00000095677	Dynlt1f	A	-0.819093837369853	-1.32150620100458	-1.41135760858191	-1.63791518615539	-1.87942393761958	-1.22854420620316	1.12568357711747	1.50727600787917	1.46770199091303	1.35762587588402	1.30905098150903	1.53050254363174
ENSMUSG00000037568	Vash2	A	-1.38685825826072	-1.4507956006779	-1.19905180697199	-1.60955485585897	-1.40460063021485	-1.27283906799259	1.29304011062268	1.42947670640136	1.18367039586006	1.38000793834537	1.38554342259358	1.65196164615396
ENSMUSG00000029121	Crmp1	A	-1.26199513775811	-1.48634935455401	-1.16985270250772	-1.45409490916972	-1.40573563471626	-1.46611850773946	1.31064428821625	1.38198062594654	1.38891796527343	1.38559293035424	1.32400430489853	1.45300613175628
ENSMUSG00000105211	Gm47302	A	-1.24573176344379	-0.71287405113568	-0.664154559419741	-1.92728667933635	-0.775747330575735	-1.93320264595232	1.43775041079647	-0.222632318112659	2.32958254248552	1.15265602967157	1.40679486924895	1.15484549577376
ENSMUSG00000018411	Mapt	A	-1.47663749700331	-1.55473817305654	-1.42907028732588	-1.13167204333424	-1.26126264621824	-0.124631310328715	0.457024161430886	2.50797885798368	0.551514059551284	0.62700790627312	2.36077800220605	0.47370896982189
ENSMUSG00000074480	Mex3a	A	-1.38961587498718	-1.33525455097917	-1.31757042949442	-1.51063302671244	-1.28717134367981	-1.31883411307867	1.33499546065092	1.3599115209593	1.31547966684628	1.37408488032466	1.19642833001919	1.57817948013132
ENSMUSG00000096255	Dynlt1b	A	-1.11988654160728	-1.2178357096663	-1.32163858271395	-1.70741109050923	-1.43576144473133	-1.31352085251143	1.33157180733672	1.45228684222398	1.38082736475063	1.35625672629273	1.37403591537117	1.2210755657643
ENSMUSG00000029711	Epo	A	-0.0560074368807442	-2.1666483004893	0.20111609756732	-0.0548517612113844	0.806962607698477	-2.1666483004893	0.918129479537579	0.89834057700946	0.966010133572475	2.03758923453551	0.782655969639216	-2.1666483004893
ENSMUSG00000072235	Tuba1a	A	-1.14171199427639	-1.39750827651913	-1.30491789150103	-1.49145092730273	-1.41433454874239	-1.3348436555552	1.32277833213957	1.4132039804479	1.25670557742522	1.27509715025377	1.35749799534713	1.45948425828327
ENSMUSG00000044847	Lsm11	A	-1.30684977392787	-1.40408324676227	-1.15437457351091	-1.40131309321501	-1.37935982056457	-1.40415197243727	1.38517786475036	1.17442345389243	1.49469167546564	1.46840357591464	1.29976874633048	1.22766716406434
ENSMUSG00000070527	Mkrn3	A	-1.04201709730946	-1.44788942236189	-1.40210787691813	-1.54872605107082	-1.38052439403735	-1.2067400515844	1.24952531766944	1.43783348185145	1.42655923133825	1.38565789341514	1.20096098485094	1.32746798415683
ENSMUSG00000047261	Gap43	A	-1.24623403645985	-1.26463039805835	-1.36745699038463	-1.19280191869758	-1.60372834058943	-1.33573465274216	1.29346217628639	1.38556830124177	1.3037604158249	1.23853445658248	1.31769490598704	1.47156608100942
ENSMUSG00000037872	Ackr1	A	-2.0817833259462	-1.03741728517191	0.852979133031183	0.772641409196777	0.676100759201816	-2.1171630890287	1.01054188043866	1.08917184854522	1.12472495795328	0.886944062520632	-2.13559172445501	0.958851373714257
ENSMUSG00000074506	Gm10705	A	1.16638257342152	-0.449779524065592	-1.91626701189828	-2.34639421910225	-0.461711945929287	1.81843827426777	1.71439908255525	0.708572360826155	-1.54066597181321	0.295138678637175	-0.097851286554405	1.10973898965515
ENSMUSG00000032517	Mobp	B	3.67581960336302	4.00746673591117	3.36116366929836	2.89141472786876	3.98337097122324	3.81261572351989	-3.59200218099148	-3.54135139982381	-3.64667044975173	-3.62667060224341	-3.63946485692284	-3.68569194145117
ENSMUSG00000099227	Mir8114	B	-2.15799229612173	-2.16549008718683	5.83131107518915	6.02730594598594	6.08240876458975	-1.87272070417154	-2.04332765746243	-2.34330365182899	-1.90936406951537	-1.62482762911468	-1.95474560274276	-1.86925408762049
ENSMUSG00000031425	Plp1	B	3.67014534351588	3.9482146232825	3.21359393222139	2.53898883845008	3.67766274682855	3.5214349191964	-3.4507070594041	-3.6484451645513	-3.29662180928583	-3.1429480312756	-3.28120266268288	-3.7501156762951
ENSMUSG00000027375	Mal	B	3.29023728012143	3.44331892085686	2.91831228560339	2.15901679409518	3.24582984733156	3.1984970935423	-2.90606389785453	-3.49416789217385	-2.78514397410669	-2.90241753601136	-2.90140229675113	-3.26601662465318
ENSMUSG00000076439	Mog	B	2.86207040137775	2.95897843897429	2.37953944019082	1.51396491360935	2.59670282097799	2.56123671704864	-2.51839046687327	-2.32642228354913	-2.26608900927974	-2.59996029074871	-2.68394049457047	-2.47769018715754
ENSMUSG00000036634	Mag	B	2.80267818304533	2.79047485322696	2.27354718573485	1.59537821474732	2.69402312885924	2.68263316304392	-2.55351741581804	-2.50604184726357	-2.56260277013379	-2.23147121607764	-2.44872587978552	-2.53637559957906
ENSMUSG00000037625	Cldn11	B	2.75215100733703	2.83589358194197	2.32336273183373	1.54372227430632	2.6805984109106	2.60452132910911	-2.35867137422895	-2.81006293254598	-2.23139289482501	-2.48392256104639	-2.18379262976818	-2.67240694302426
ENSMUSG00000022425	Enpp2	B	1.99357725706418	3.20921905679758	-1.02818206465695	2.65097658680732	2.35934248228717	2.24958781390912	-2.81688102656623	-2.91492516391151	-2.35639768127691	-0.182276399847138	-0.507517087183726	-2.65652377342289
ENSMUSG00000041607	Mbp	B	2.17079244934745	2.43459529656828	1.98799925953186	1.7220931822986	2.54497627870583	2.3356249625234	-2.05864922845088	-2.1337597945331	-2.16499750121248	-2.13622972781743	-2.15472094461112	-2.54772423235043
ENSMUSG00000007594	Hapln4	B	2.06162602955854	1.8550817470742	2.29756862458207	2.13289272329111	2.13620977732232	2.02527565006741	-2.04771934182392	-2.14298316690478	-2.04542624024161	-2.03050941765011	-2.10544766302494	-2.1365687222503
ENSMUSG00000005716	Pvalb	B	2.25004773224557	1.84938869136046	2.05617986074712	2.00765762556018	2.04658185526082	2.15871464812225	-2.05211406324069	-2.0280443841239	-2.16981748022389	-1.74305967887011	-2.14512821760845	-2.23040658922936
ENSMUSG00000050121	Opalin	B	2.31889570790976	2.25886272702419	1.9715018115545	1.1776281543998	2.35724933850022	2.16747611910668	-2.07043010684843	-2.07043010684843	-2.01671817806239	-2.07043010684843	-2.07043010684843	-1.95317525303904
ENSMUSG00000073680	Tmem88b	B	2.07656633753035	2.31530500158319	1.82546367869835	1.22552554106468	2.02655107698526	2.17057785916439	-1.81833430833679	-1.63630781744889	-1.93699737992272	-2.1952850342781	-2.0693141164119	-1.98375083862783
ENSMUSG00000026830	Ermn	B	2.07724395593413	2.28648317553069	1.52518941762735	1.27156131119184	2.12939008118527	2.12237382172498	-1.90461284842462	-1.97466061787241	-1.88669410888421	-1.9168444848927	-1.86129784690036	-1.86813185621995
ENSMUSG00000033579	Fa2h	B	1.8959788568444	2.39834557177256	1.95460342486675	1.11462756276579	2.04064538843028	1.86986560569696	-1.94853241443198	-1.75053481141016	-1.71177415487145	-1.75823856498742	-2.10066228915972	-2.00432417551601
ENSMUSG00000032554	Trf	B	2.0175802522056	2.15768178048227	1.57546981938714	1.34134287256032	2.12107099636747	1.93253617778898	-2.05264064936502	-1.95956358891128	-1.59952880484372	-1.62296642586788	-1.91619853992068	-1.99478388988318
ENSMUSG00000022602	Arc	B	0.835922664317406	0.703850007234258	1.09561060272065	2.10825373099719	2.62562533105287	2.48168685456357	-1.66265715869825	-1.76020950611244	-1.5628408062468	-1.45901576864907	-1.46190016589712	-1.94432578528226
ENSMUSG00000043448	Gjc2	B	2.06264355953443	2.03250782005116	1.64203985919751	0.769089076194055	1.52742901521885	1.60619087943572	-1.78020352581458	-1.55556709507829	-1.57304095220967	-1.57665531857447	-1.39518702514757	-1.75924629280715
ENSMUSG00000046093	Hpcal4	B	-0.1820988704107	0.719155460485178	0.755246608112713	3.02941054297113	0.699878283258142	2.90300870402751	-0.567312194568978	-1.71219828922082	-1.21290944944045	-1.50585585625656	-1.06759699447335	-1.8587279444838
ENSMUSG00000036907	C1ql2	B	1.59731746742196	1.32397123317233	1.78081207310209	1.6479645261706	1.5429535060639	1.57507358347522	-1.99742235342926	-1.92952068008385	-1.47716102188594	-1.43874005820647	-1.35464454246988	-1.2706037333307
ENSMUSG00000085838	Chn1os1	B	1.42139760021499	1.35270010912302	1.89849931417401	1.71263659827835	1.45950348640075	1.45025364937785	-1.36479249769843	-1.84180207541824	-1.28980609449693	-1.26933398178312	-1.56082508955992	-1.96843101861235
ENSMUSG00000107272	Gm34583	B	1.37640248324924	1.53290861885573	1.66074955140438	1.03191884831438	1.83624697678367	1.85452470478876	-1.63709370816699	-1.63709370816699	-1.44244452058819	-1.63709370816699	-1.30193183013999	-1.63709370816699
ENSMUSG00000032854	Ugt8a	B	1.8615625339163	2.05434334366065	1.45140214747442	0.832231966415884	1.54868137803251	1.47364264834939	-1.71942677460076	-1.62366868893843	-1.40038945960339	-1.36943158630253	-1.51020061587707	-1.59874689252697
ENSMUSG00000017167	Cntnap1	B	1.43876757195313	1.37830736128675	1.608435421633	1.65664055404836	1.61074799986452	1.53969676210277	-1.3066001165902	-1.82686933134096	-1.32384914579217	-1.28436814001579	-1.67119490275121	-1.8197140343982
ENSMUSG00000006782	Cnp	B	1.84725870564303	1.87031281402578	1.42238585442515	0.634106184135875	1.6890124762344	1.61819728410704	-1.58250176435663	-1.47105949310397	-1.48313333241398	-1.24202847176004	-1.57597882636697	-1.7265714305697
ENSMUSG00000021750	Fam107a	B	1.28989206741884	1.49283359005423	1.4195599616478	1.68257415070114	1.68324636546976	1.59014864201612	-1.56465064490659	-1.74181744575472	-1.3035838769359	-1.31292514613906	-1.3016986717358	-1.93357899183582
ENSMUSG00000049892	Rasd1	B	1.4191380832318	1.20681509937214	1.76650768203062	1.24412418741798	1.76404081435792	1.61070260405077	-1.33483025362268	-1.77062617205805	-1.38164572766839	-1.51388242682394	-1.36158493558197	-1.6487589547062
ENSMUSG00000074968	Ano3	B	1.34902790903494	1.45754590946828	1.56353840207752	1.54279987496013	1.66144805025919	1.48115064061279	-1.48253023754979	-1.49602641268108	-1.36839396974726	-1.34472245617491	-1.73443114596991	-1.6294065642899
ENSMUSG00000037166	Ppp1r14a	B	1.62280501506578	1.8556134613208	1.43940192524231	0.763703847010777	1.72993487242475	1.47206643807787	-1.30571545625271	-1.49394069024623	-1.50204922183506	-1.61540839410032	-1.64342054922106	-1.32299124748692
ENSMUSG00000056966	Gjc3	B	1.45439600332827	1.84208008404576	1.37483928474386	0.804515452889014	1.76509659791691	1.64207881915412	-1.37209629098476	-1.49893273413272	-1.54838551070363	-1.37036978687787	-1.51101168596762	-1.58221023341133
ENSMUSG00000026879	Gsn	B	1.68354886338169	1.82056317430742	1.21353700670248	0.671635871578117	1.45576457467002	1.33812176536908	-1.43717747637799	-1.76906580470996	-1.34420394782795	-0.867557340745609	-1.00273842749887	-1.76242825884844
ENSMUSG00000024883	Rin1	B	1.26700313878339	1.32076204153349	1.46625910952432	1.45119425681585	1.30367327231257	1.46135211138384	-1.09648114892363	-1.54261593097504	-1.19378977506754	-1.49959606218993	-1.34102577912293	-1.5967352340744
ENSMUSG00000064353	mt-Td	B	0.983727308235284	1.38334630389976	1.32110380880018	1.48476173929528	1.72946750879062	1.30803468995572	-1.29805068213586	-1.53107935838955	-1.10949669245544	-1.35825135590069	-1.24622482065506	-1.66733844944026
ENSMUSG00000030701	Plekhb1	B	1.07644658001458	1.27501273623804	1.54764171935063	0.799476204812438	2.03843537999459	1.17960692834596	-1.27087765488341	-1.2703778853019	-1.20672660521603	-1.41945311545174	-1.47024140234457	-1.27894288555859
ENSMUSG00000098265	Gm27517	C	-0.971235511873463	3.09292719317523	3.1145567789217	-1.23601228912449	-1.32157762747688	-1.33565603135416	-0.954420453774181	-1.00121204593227	-1.04685362524161	-0.969089648238089	3.85565772596855	-1.22708446505034
ENSMUSG00000079436	Kcnj13	C	1.58705710244447	2.50928594979568	-2.02016954326303	2.02464505723394	2.01690368024349	1.78664384865715	-1.991460363803	-2.22089211900517	-1.66933716967434	0.372573338136905	-0.207907486667722	-2.18734229409837
ENSMUSG00000022949	Clic6	C	1.42310005991197	2.30195873013272	-1.63392553965157	1.92455435935439	1.82763033448976	1.58681004742887	-2.1654931209585	-2.30704224352395	-2.14881371906114	0.768523621393468	0.65416592968714	-2.23146845920315
ENSMUSG00000115625	2900040C04Rik	C	1.53203241389844	2.36840119641235	-1.6537146777886	1.73183612305012	1.60249131029044	1.63155450819749	-2.08973042750371	-2.08973042750371	-2.08973042750371	0.802092735162268	0.344228100792357	-2.08973042750371
ENSMUSG00000104797	Mir1897	C	-1.7306075574849	2.45794371593807	2.16138524207982	-1.68390946818803	1.35663926852912	-1.42360306994281	2.01941016956372	-1.71453008510208	0.563336548227382	1.33935087611856	-1.70514553135392	-1.64027010838493
ENSMUSG00000087563	Gm14205	C	3.68531873089165	-0.765508028764078	-0.765508028764078	-0.765508028764078	-0.752426011637762	-0.765508028764078	-0.765508028764078	-0.765508028764078	3.95667953962281	-0.765508028764078	-0.765508028764078	-0.765508028764078
ENSMUSG00000039672	Kcne2	C	1.27084681361484	2.32706987573828	-1.82907407339864	1.75380357377559	1.23618293310764	1.38960241784552	-2.01492873973206	-2.01492873973206	-2.01492873973206	1.10223300606867	0.746879447721678	-1.9527577752774
ENSMUSG00000026051	1500015O10Rik	C	1.14433400109796	2.237240887073	-2.6425137665501	1.29644879278721	1.29177707451772	1.29190074912333	-1.41005175194444	-1.81122692621939	-1.70439272668671	1.15973352312825	0.608194351936885	-1.4614442082637
ENSMUSG00000058488	Kl	C	1.31079230864581	2.28526279992404	-0.480090617984507	1.9387468234599	1.68820435500149	1.48207982208271	-1.61301686021095	-1.64875934160724	-1.43650330076736	-0.683912461318845	-0.954897624604476	-1.88790590262057
ENSMUSG00000089739	Gm20431	C	-0.45937400227904	-0.45937400227904	-0.45937400227904	5.05311402506944	-0.45937400227904	-0.45937400227904	-0.45937400227904	-0.45937400227904	-0.45937400227904	-0.45937400227904	-0.45937400227904	-0.45937400227904
ENSMUSG00000116048	Sept2	C	0.922306987999443	1.40726353701714	1.14617897403001	-1.26104913131762	-2.76542696481381	1.22341424065409	-1.38975063778713	-1.11767102864784	1.88833957276335	-1.34537091102347	1.87430115422682	-0.582535793100976
ENSMUSG00000004655	Aqp1	C	0.64664484254451	1.42342699560971	-1.94366518876032	1.22898083314446	1.22636238692839	0.905652627330656	-1.62255752834121	-1.66828991991177	-1.62191272635421	1.71213261334597	1.2468913861506	-1.5336663216868
ENSMUSG00000034739	Mfrp	C	1.04346537458604	1.83649482517899	-1.3466758103017	1.60832900694778	1.72462000720749	1.22012591072544	-1.54459707556686	-1.5892397352628	-1.54362325071984	0.350836466258925	-0.230352892315553	-1.52938282673791
ENSMUSG00000037086	Prr32	C	1.06574537782004	1.64450936513161	-1.50140764532364	1.30557502195999	1.35925695610429	1.19082976273453	-1.68003816002849	-1.68003816002849	-1.50931957401871	0.850196674429726	0.634728541247636	-1.68003816002849
ENSMUSG00000038155	Gstp2	C	-1.49445996133784	-0.298863535330424	-1.49445996133784	1.19347347268541	1.39023328963458	1.9664060321152	1.29240045230558	-1.49445996133784	0.682425735547145	1.24622435973169	-1.49445996133784	-1.49445996133784
ENSMUSG00000065968	Ifitm7	C	0.368676555639437	-2.29991990999018	0.612276256902734	0.702969605611385	0.627384045694785	0.593482198788246	1.05064547278067	-2.32165338104721	1.06217592037838	0.943689775482345	-2.23690268491434	0.897176144673741
ENSMUSG00000102543	Pcdhgc5	C	1.81412795199563	-0.502865523875861	-0.287796695785035	1.68837809124461	1.59421835558746	0.100961212456461	-1.03821910107165	-1.97150623144961	-0.531423599805641	-1.69131390089979	1.80138670720707	-0.975947265603633
ENSMUSG00000061808	Ttr	D	3.60443280238034	4.53120309371696	-2.83137389370864	3.93391895152269	3.80229876764959	3.65053210315301	-5.5562752797024	-7.04427065454888	-4.85154787194776	3.4521055468214	2.99615001349721	-5.68717357883352
