# Supplementary material for: Egr2 Upregulation Induced Mitochondrial Iron Overload Implicating in Cognitive Deficits after Sevoflurane Administration
Source: Research Square preprint supplement (doi:10.21203/rs.3.rs-104467/v1), 2020-11-13
Supplement: Supplementary file 2 [file 71e292275b9c0e7eedbad122.csv]

Study_design	P30-con-1	P30-con-2	P30-con-3	P30-sev-1	P30-sev-2	P30-sev-3	P6-con-1	P6-con-2	P6-con-3	P6-sev-1	P6-sev-2	P6-sev-3
Treatment	Control	Control	Control	Sev	Sev	Sev	Control	Control	Control	Sev	Sev	Sev
Day	30	30	30	30	30	30	6	6	6	6	6	6
