# Supplementary material for: Egr2 Upregulation Induced Mitochondrial Iron Overload Implicating in Cognitive Deficits after Sevoflurane Administration
Source: Research Square preprint supplement (doi:10.21203/rs.3.rs-104467/v1), 2020-11-13
Supplement: Supplementary file 3 [file bb48deb7a7592441de63b2b9.csv]

Data.Matrix	P30-con-1	P30-con-2	P30-con-3	P30-sev-1	P30-sev-2	P30-sev-3	P6-con-1	P6-con-2	P6-con-3	P6-sev-1	P6-sev-2	P6-sev-3
ENSMUSG00000000001	11.332376	12.017881	9.373273	9.956932	10.832254	10.73599	23.60355	24.261337	27.353559	28.560225	23.552649	30.116671
ENSMUSG00000000003	0	0	0	0	0	0	0	0	0	0	0	0
ENSMUSG00000000028	0.972626042	1.027584903	0.677495472	0.964707286	0.851842062	0.67888957	1.855190321	2.560019222	1.922966065	1.474826654	2.441675374	1.109634838
ENSMUSG00000000031	0.085928362	0.383853231	0.323406972	0.130842834	0.165089706	0.032709471	4.479687993	2.577295772	4.980187089	3.695922873	2.850155882	2.683127216
ENSMUSG00000000037	0.020010719	0.069791538	0.026642952	0.059171832	0.028108454	0.120083454	0.227239999	0.133207877	0.16972807	0.167413259	0.201167163	0.185256573
ENSMUSG00000000049	0.119646782	0.186768628	0.502924153	0.342936053	0.297308208	0.475438335	0.162090132	0.155031699	0.091719378	0.251938494	0.072100765	0.0845067
ENSMUSG00000000056	11.37624038	12.7084201	11.80832984	12.56427069	11.08105726	13.02827339	19.5969818	16.98023126	20.26989807	15.6444246	16.21396012	16.56346724
ENSMUSG00000000058	5.276905509	6.777577559	6.726901212	5.785326404	6.376266229	6.386648683	8.024540563	7.277364167	9.817262358	8.510177019	8.363105535	8.342467331
ENSMUSG00000000078	5.749728434	6.679015836	5.427457763	6.014390234	6.363645865	5.361241678	12.83748692	11.73205645	12.15254746	11.85376827	11.9101392	12.40018746
ENSMUSG00000000085	4.249450193	3.436759933	3.753583655	4.879492343	3.6806615	3.573506489	5.463570343	5.115532449	5.257850886	5.04854227	4.412141155	6.29359395
ENSMUSG00000000088	54.94501053	42.89986647	45.27147473	41.9045139	42.65602533	51.99746037	56.92240689	62.81244151	51.47101229	59.64480552	58.85442961	58.08364479
ENSMUSG00000000093	0.656714	1.07377	0.41055	0.638312	0.682225	0.482745	1.200963	0.856268	0.690008	1.213279	1.151797	1.12109
ENSMUSG00000000094	0.082555571	0	0.069290906	0.075045294	0.104485655	0	0.409527512	0.244211485	0.360380205	0.149209861	0.235641555	0.205145249
ENSMUSG00000000103	0	0.049684547	0	0	0	0	0	0	0	0	0	0
ENSMUSG00000000120	0.325711	1.204364	0.315314	0.794533	0.427475	0.420577	1.592427	1.445515	1.398689	2.430889	2.580845	1.076309
ENSMUSG00000000125	0.807781	0.929185	0.540495	0.419412	1.207382	1.177172	0.559617	0.506513	0.7317	0.537607	0.435201	0.63478
ENSMUSG00000000126	2.311371235	3.464842675	2.927848894	1.146955096	0.779020225	1.223030541	1.477890046	0.922282238	1.398770725	1.305198675	1.545588527	1.480216546
ENSMUSG00000000127	4.060988678	5.442721095	3.869134591	4.894376917	4.099091008	3.78902348	7.241349295	5.80239813	7.422503097	6.114690537	5.684090293	6.061801355
ENSMUSG00000000131	3.683081278	3.650207559	3.686825441	4.294961791	3.714772088	3.44541304	5.733646723	5.398205835	4.806610866	5.285593045	4.14547091	4.773527435
ENSMUSG00000000134	3.21911496	3.283769991	3.378170263	3.393704148	3.49570895	3.446768084	2.839261746	2.89859891	3.067945575	3.560022181	3.258380743	3.251166166
ENSMUSG00000000142	2.988489183	3.564739417	3.463532978	3.213083793	3.620865806	3.628339386	4.191865582	3.814861793	4.18937792	4.404449639	4.311914434	5.181306182
ENSMUSG00000000148	3.074807808	2.789991619	2.557620372	2.421446955	2.623957049	2.795490503	4.055625876	4.414507925	3.743571225	3.716923224	4.123876027	3.837830187
ENSMUSG00000000149	41.44529	42.599651	36.661335	29.810865	42.387505	39.572224	39.110092	45.012432	41.059811	44.823887	40.581455	42.071503
ENSMUSG00000000154	0.124878908	0.721958696	0.567208446	0.418251221	0.105456527	0	0.269524577	0	0.406930929	0.109141171	0.22418133	0.045645608
ENSMUSG00000000157	0	0.026026223	0	0	0	0	0	0	0.025329123	0	0	0
ENSMUSG00000000159	0.199435547	0.290862545	0.169615441	0.34328472	0.28976448	0.261379804	0.275954535	0.202889944	0.361229811	0.422013061	0.223337939	0.221297556
ENSMUSG00000000167	0.316699126	0.681369696	0.387368872	0.284913228	0.434701248	0.447487872	0.435612929	0.314871774	0.257851	0.522572906	0.28615132	0.467342979
ENSMUSG00000000168	24.71567183	24.02807268	25.0927753	24.18881627	22.16550058	26.8667539	19.96454195	17.21524298	20.82406194	18.79407383	19.22822872	18.38363925
ENSMUSG00000000171	64.970482	62.33477	62.332787	60.783337	56.489647	66.714256	77.852646	83.038261	83.268272	92.609032	84.072815	81.362083
ENSMUSG00000000182	0.152571	0.084958	0.044494	0.04813	0	0	0	0.078192	0.12065	0	0	0
ENSMUSG00000000183	0	0	0	0	0	0	0	0	0	0	0	0
ENSMUSG00000000184	8.323649647	9.404431304	7.67789713	11.71897319	11.19385825	9.872771595	19.41532025	17.05748292	23.79568247	23.05848874	18.27819664	19.0388998
ENSMUSG00000000194	3.892990231	4.28664267	4.16901634	4.667048179	4.87310092	4.391059088	6.58930565	5.821867468	6.219078211	5.808878751	5.564958686	5.782498629
ENSMUSG00000000197	6.43081204	7.227207754	6.43584761	7.625153455	7.082550617	6.918719411	6.088973518	4.871471404	6.319308742	5.573193615	5.675398808	5.728804505
ENSMUSG00000000202	4.323806996	3.797270473	4.570176506	3.956722178	3.903489184	3.458025681	6.865923776	6.676372126	7.470380393	5.018064987	5.862594843	7.075602593
ENSMUSG00000000204	0	0.058414449	0.020429031	0	0.022523856	0	0	0	0.017588338	0	0.019358654	0.019629244
ENSMUSG00000000214	0.453712008	0.329659574	0.433818909	0.404159968	0.074388706	0.498482461	0.312070511	0.251839426	0.232001837	0.085830699	0.430177123	0.277141902
ENSMUSG00000000215	0.264851719	0.464759305	0	0.436058485	0.33344104	0.448134046	0	0	0	0.034862671	0.202182073	0
ENSMUSG00000000216	0	0	0	0.028314	0.029652	0	0.052051	0.047581	0.023309	0.025832	0	0
ENSMUSG00000000223	2.600809253	3.122516655	3.345571435	4.157970184	4.185463056	3.704581427	4.374462132	3.714704566	5.755625712	3.539646107	3.407558658	3.87751039
ENSMUSG00000000244	0	0.03714421	0.006495281	0.035012551	0	0.026890864	0.012549399	0	0.011183697	0.027414831	0.061097905	0.028125375
ENSMUSG00000000247	13.40535553	13.42922995	14.94119438	16.78196414	14.03504029	13.02417595	23.53370729	23.63515462	24.42916867	25.46010101	22.68329166	26.62760859
ENSMUSG00000000248	0	0	0	0	0	0	0	0	0	0	0	0
ENSMUSG00000000253	25.80168524	22.37708521	26.68298486	20.47686464	24.14971232	25.66962299	17.61936608	14.50824608	16.41753093	17.25331132	16.5852829	15.08105928
ENSMUSG00000000263	0	0.031973923	0.093930762	0	0.037110344	0	0	0.029476997	0	0	0	0
ENSMUSG00000000266	2.140411633	2.719881322	2.237253937	2.579835834	2.158529571	2.520912801	2.620000937	2.27485832	3.085022831	2.832074379	2.402251765	2.753061781
ENSMUSG00000000275	1.200021407	1.414037027	1.074811872	2.061146561	2.120215161	2.066247726	1.931344516	1.662849315	1.96328488	2.035690323	1.796588798	1.768628576
ENSMUSG00000000276	7.953332433	5.930541216	9.832833919	9.634355779	8.87054769	8.808367753	4.972690433	6.390570018	4.717078644	8.258402239	4.850640357	7.753526147
ENSMUSG00000000278	4.567148	5.00981	2.896358	4.025078	4.722058	4.911262	7.0882	7.075627	6.808124	8.157076	7.160275	6.735463
ENSMUSG00000000282	8.561503514	9.195157985	8.298641475	10.8937706	10.08529457	10.12454828	12.49654902	11.32612879	10.56266752	12.05638478	11.2325095	12.05704463
ENSMUSG00000000290	1.358150249	1.752350603	1.685536307	1.603019548	1.903540341	1.418272313	0.682785265	0.484952733	0.463915557	0.406263303	0.461643293	0.237092025
ENSMUSG00000000295	2.560790184	1.727218163	2.440117271	1.770372178	2.230340987	2.055376765	4.382019949	4.915484262	4.119833238	5.480623556	3.967187894	5.100519334
ENSMUSG00000000296	19.13029306	21.67191191	15.44088072	23.05624643	19.9884556	19.23424947	10.52560367	12.19784702	11.6203081	13.86494965	15.40789685	12.2121205
ENSMUSG00000000301	0.936731549	0.98519526	0.607855772	0.880811517	0.668901952	0.760437162	0.96072285	1.327600012	0.734249634	1.298490354	1.409531143	1.332370152
ENSMUSG00000000303	0.046231224	0.34396519	0.133730988	0.133360046	0.067113435	0.11914608	0.332342009	0.108794563	0.467608839	0.141755157	0.15054833	0.410940127
ENSMUSG00000000305	1.69746899	1.933150726	1.824096767	1.700631227	1.578183161	1.720395343	6.875394801	7.261284723	6.91665551	7.028037292	6.979480349	8.32094917
ENSMUSG00000000308	51.83987511	46.5423612	49.60952501	49.08003888	49.54360488	51.75877094	30.44359297	31.01966608	30.92837559	31.86334206	32.08610893	33.13092409
ENSMUSG00000000317	0.379445677	0.445111187	0.286344416	0.611101356	0.630878365	0.480955423	2.772888626	3.41550932	3.208357142	3.0748828	2.850853013	3.128804008
ENSMUSG00000000318	0.082596373	0.08992961	0	0.149477593	0.148554594	0.077750034	0.053972109	0.024152221	0.12724763	0.157030976	0.072379681	0.093772302
ENSMUSG00000000320	0.068212693	0.353828552	0.296571529	0.053004198	0.062866491	0	0.019087526	0.057251146	0.067346554	0.112133551	0.100816703	0.056532974
ENSMUSG00000000325	4.742000434	5.018912796	5.545558829	5.64696154	4.763772327	4.72444972	9.73819745	9.844547308	9.683663506	8.133566874	8.364121182	9.201904705
ENSMUSG00000000326	20.91221926	17.61943799	22.35960182	21.22389214	20.51757071	29.44680654	16.5325845	18.1354129	17.69656641	15.85581627	14.66070416	15.15672375
ENSMUSG00000000339	26.3463249	24.33949245	30.12096266	23.59326729	23.75755666	25.74153385	31.92783743	31.89383338	31.91458444	33.85939686	34.01744282	31.814448
ENSMUSG00000000340	5.949938117	6.008932075	5.166974993	5.616473436	5.803772636	6.196157987	5.671766466	4.261234988	5.456578967	5.566491864	5.59392288	5.774592102
ENSMUSG00000000346	40.78465252	40.86064222	37.95672236	37.25108847	42.22766759	46.89864506	29.62758916	29.37083715	31.04287023	33.03706961	31.05017321	31.0973412
ENSMUSG00000000355	15.86580054	14.3676553	14.55006744	12.79058703	11.99674772	12.66456834	14.87911319	11.88491069	13.51175037	12.62521858	11.01600974	12.63733406
ENSMUSG00000000359	0.259396874	0.194633874	0.131088544	0.319641558	0.300970877	0.244148182	0.164133537	0.098353029	0.578509543	0.16575158	0.24891644	0.143758798
ENSMUSG00000000365	0.049874312	0.022508429	0.034502353	0.108696834	0.028421889	0.029253535	0.013371285	0.045492566	0.080655344	0.04288392	0.109803447	0.037402993
ENSMUSG00000000374	11.92703922	12.99879149	12.71028491	13.45020088	13.01257423	12.54010355	14.98880405	13.86271669	15.29649966	15.97604396	14.23424181	15.29423671
ENSMUSG00000000378	11.47633429	11.88019662	10.85544337	12.31566762	10.70149142	11.53095828	14.00841901	13.44373803	14.21027544	11.60705623	13.50412064	11.24733456
ENSMUSG00000000381	0	0	0	0	0	0	0	0	0	0	0	0
ENSMUSG00000000384	5.56582069	4.122239765	4.698030282	4.7828097	5.585461434	5.13626711	5.628293381	5.142307232	4.785457412	5.608839571	6.222246401	5.406768686
ENSMUSG00000000385	0	0	0	0	0	0	0	0	0	0.058699	0.024292	0
ENSMUSG00000000386	0.038794737	0.084397538	0	0.023945672	0	0.025079266	0	0	0	0	0	0
ENSMUSG00000000392	0.381183144	0.762773816	0.028510408	0.456819293	0.431681761	0.288691882	0.061475278	0.061748387	0.036015167	0.416007853	0.272622545	0.109116251
ENSMUSG00000000394	0	0	0	0	0	0	0	0.128661029	0	0	0	0
ENSMUSG00000000399	49.39525779	45.05480561	42.87614487	37.83321111	37.2592495	45.26059261	39.53470131	39.97001857	38.94181018	41.65760373	38.71666957	38.21660078
ENSMUSG00000000402	0.86477	1.138941	1.284114	0.780059	1.451384	1.286029	1.338404	0.947919	0.921073	0.763786	0.778179	0.885726
ENSMUSG00000000409	0.274053503	0.39159892	0.348560526	0.569027492	0.134075748	0.532130046	1.71309192	1.438395387	1.238595991	1.690379332	1.683760254	1.920189393
ENSMUSG00000000411	0	0	0	0.136191	0	0	0.082867	0	0	0	0.209235	0.109431
ENSMUSG00000000416	11.43591628	10.63151764	13.72351929	12.23594804	11.22267541	10.61053612	7.500585129	7.313330819	7.034696937	7.041048919	5.973222184	7.597867321
ENSMUSG00000000420	7.453365028	7.721411824	6.118460923	7.47808734	8.215818558	7.427131181	9.236977813	7.924340771	9.066976166	10.97107229	9.986334422	9.127733688
ENSMUSG00000000435	0	0	0	0	0	0	0	0	0	0	0	0
ENSMUSG00000000439	7.135181389	6.582904917	7.024868711	6.84605906	6.486798117	6.756666893	9.917299405	10.20817703	10.08545009	10.32816819	9.934573559	10.8004962
ENSMUSG00000000440	0.285319209	0.307669489	0.0760229	0.504222274	0.317122968	0.322136471	0.224922579	0.244497875	0.205087326	0.094190823	0.18372779	0.188843634
ENSMUSG00000000441	8.845834704	9.739479486	8.83982936	8.136077427	9.099620109	9.16641116	16.53660081	16.35908634	16.66809351	17.47393457	15.40613252	17.0734366
ENSMUSG00000000486	0.277550755	0.557589725	0.366173277	0.365071029	0.519743418	0.569107596	0.410112803	0.44645029	0.500706093	0.720113784	0.367380214	0.347270258
ENSMUSG00000000489	5.943910622	6.3554627	6.284182439	8.636451636	8.061871487	7.755908213	11.49227944	11.84524003	12.06318058	12.34640071	12.17413712	9.814500002
ENSMUSG00000000530	1.759708192	2.19454204	1.707260637	1.757898662	2.291325895	2.135378247	1.32128745	1.289584192	2.036451164	2.1998281	1.715728956	1.819627009
ENSMUSG00000000531	26.044718	23.913359	28.203938	28.656034	27.316076	28.927692	8.16133	8.08187	9.307309	9.55468	9.482818	8.202493
ENSMUSG00000000532	26.577374	26.897306	29.553415	30.670824	30.877878	30.275936	35.483761	32.546917	33.727802	33.90554	31.327372	35.102936
ENSMUSG00000000538	25.82699891	26.55745342	27.51688969	29.38659648	28.08266165	27.57335021	16.63518041	15.18415016	17.02511317	15.67019489	15.28991728	14.74468849
ENSMUSG00000000544	0	0.025052775	0	0	0	0	0.02853085	0	0.066277863	0	0	0
ENSMUSG00000000552	17.69172169	15.642801	16.02319326	19.29401105	12.95157719	16.76295103	18.89223957	17.72791289	15.63531851	17.36295884	17.68895672	17.08950776
ENSMUSG00000000555	0.548384536	0.489104427	0.5513529	0.381321482	0.566803112	0.401682251	1.640213141	1.873180566	1.848964795	2.004566211	2.010790241	1.731849451
ENSMUSG00000000560	5.899615279	7.090280978	6.095374317	7.123079881	6.442991393	4.972377005	2.549912437	1.833216581	2.546936272	3.00381955	2.28953288	2.45719866
ENSMUSG00000000561	4.538501768	4.552463065	4.80505689	4.340388941	8.254341848	5.273898307	5.939460698	5.499074037	11.50715588	5.839471582	5.982693559	5.406568661
ENSMUSG00000000562	0.112403447	0.22427023	0.200754355	0.14984401	0.19966579	0.259759327	0.167556583	0.152339136	0.018509293	0.121913639	0.192185758	0.124919479
ENSMUSG00000000563	55.77376157	54.78360491	52.66704349	50.81682628	49.37320078	51.2132642	46.77140691	50.83305803	47.05224564	47.00700696	46.60122117	51.73703583
ENSMUSG00000000567	5.973516	7.418321	5.646424	5.412566	5.32124	5.595943	7.442607	8.515752	7.903075	9.932102	8.898623	8.996646
ENSMUSG00000000568	13.36183737	14.74801277	13.845273	12.99823675	13.41569106	13.28626733	19.24513233	20.39442392	18.7701127	21.18199541	19.86949436	22.37668984
ENSMUSG00000000579	1.365793701	1.874346923	1.467284075	1.106553094	1.140280019	1.901829316	9.921463543	9.814709938	9.189101811	8.817408025	9.799984518	8.409442211
ENSMUSG00000000581	8.666682243	9.473820214	8.355580514	3.581473879	7.873600365	7.690850675	11.7424895	13.10153798	13.61660361	13.47812968	13.40388601	13.03196287
ENSMUSG00000000594	18.30253	17.003225	15.408062	16.894453	16.121943	15.499564	21.128075	20.896582	21.128111	23.681723	22.473362	20.033859
ENSMUSG00000000600	1.093766372	1.345911764	1.142472181	1.122426747	1.145627473	1.221528061	0.667987334	0.655079592	0.817713809	0.648912188	0.681700264	0.767192847
ENSMUSG00000000605	18.6960153	18.6098761	18.94745118	17.23507425	18.02696001	18.41147636	27.49817743	26.31287031	27.16463223	27.11826176	25.60300029	24.6814064
ENSMUSG00000000606	0	0	0	0	0	0	0	0	0	0	0	0
ENSMUSG00000000617	0	0	0	0	0	0	0	0	0	0	0.014156169	0
ENSMUSG00000000627	7.949477302	7.861966025	10.66767689	8.984328426	8.297952459	8.903107913	11.69243736	11.14035849	11.77122379	10.32459152	10.23442038	10.72231875
ENSMUSG00000000628	0.917528895	1.2293325	1.424909616	1.297934207	1.408015028	1.251483326	2.669095537	1.984390912	2.923261554	3.033820802	2.260914642	2.415552953
ENSMUSG00000000631	8.044108805	9.150445586	9.467632826	11.60730477	10.10682228	9.266276287	11.85366245	10.42176334	11.27059997	11.01216013	9.4885119	10.85694532
ENSMUSG00000000632	25.83055253	25.73648588	31.4934335	27.61009086	26.75740114	25.72750368	45.98098397	51.85225668	47.04715109	44.58738429	48.64028124	47.02686872
ENSMUSG00000000673	0.51772	0.063163	0	0.136939	0.21822	0.074079	0	0	0.07496	0	0	0.052629
ENSMUSG00000000682	0.875996662	1.335842403	0.954911538	0.65928013	0.873965415	0.699978797	0.393250704	0.778713031	0.292892529	0.468654548	0.704053307	0.648091712
ENSMUSG00000000686	0.222824924	0.550107279	0.407826632	0.852659016	1.057738127	0.530631054	0.425410839	0.393022486	0.426558623	0.394611427	0.510401438	0.414013322
ENSMUSG00000000690	0	0	0	0	0	0	0	0	0	0	0	0
ENSMUSG00000000693	1.319078327	1.526552679	0.930562415	1.067594258	1.330450955	0.971737149	2.013140357	1.771175834	1.403284075	1.092339443	1.188343727	1.790012691
ENSMUSG00000000701	0	0	0	0	0	0	0	0	0	0	0	0
ENSMUSG00000000706	0	0.018436333	0	0	0	0.022199223	0	0	0.033513655	0	0	0
ENSMUSG00000000708	3.388108025	5.220902944	3.222480386	4.420884911	4.22490533	4.752312349	2.363376852	2.0516048	2.583210362	2.951745156	2.406484135	2.342618244
ENSMUSG00000000711	37.57533872	37.71445429	38.58359699	40.4084797	38.61609003	38.57953225	42.68512292	41.43721571	44.7723338	47.22566859	44.16886722	44.21845668
ENSMUSG00000000724	0.177473363	0	0.045554487	0	0	0	0.120408335	0.301770981	0.083911253	0	0.371340637	0.19043662
ENSMUSG00000000730	0.11092858	0	0.133524916	0	0.054751409	0.030601972	0.021556747	0	0	0	0	0
ENSMUSG00000000731	0.023948996	0.014861666	0.021171424	0.022825317	0.014205783	0.023905572	0	0	0.018227136	0	0	0.029293405
ENSMUSG00000000732	1.784455253	1.750370627	1.80506271	2.475347772	2.032344088	2.944489324	0.767369195	0.389667468	0.486446059	0.876515784	0.829516773	0.905317893
ENSMUSG00000000738	9.395864667	9.076308538	7.93927818	8.472886234	7.676388772	8.680916251	9.922146738	8.91205405	9.166198258	9.14082651	11.15245975	8.189409037
ENSMUSG00000000739	0.266225847	0.220516928	0.403942576	0.255494173	0.364170986	0.202577048	0.034847738	0.015458512	0.011990184	0.133058962	0.009377584	0.043433313
ENSMUSG00000000740	118.3289757	114.2209709	119.1540411	111.543769	116.1276936	111.9943102	155.6098806	157.5095879	151.5837739	157.9183003	162.0252315	158.136194
ENSMUSG00000000743	31.13865832	32.09571712	32.93166029	29.27778203	29.27883657	29.10653237	40.46601448	42.66790589	39.83065289	41.28950697	41.87680852	40.63784669
ENSMUSG00000000751	12.30111388	11.5253832	6.640709715	11.48820388	10.32865143	7.603838508	8.403960165	8.410821375	9.54530988	13.49431164	8.653273447	8.918003963
ENSMUSG00000000753	4.65882851	4.459040532	5.249728521	4.026208103	4.649842808	3.808104356	8.326593273	6.867735228	10.93278929	9.558397772	8.169878693	10.22664486
ENSMUSG00000000759	3.677054386	4.249270513	3.905775788	4.115817382	3.746770524	3.489772885	3.46526232	3.496233991	3.829555549	3.829111853	3.720485525	3.50583085
ENSMUSG00000000766	0.104833588	0.218162	0.048696939	0.211655132	0.131017545	0.062574672	0.214672472	0.06773645	0.144413567	0.068675061	0.013304071	0.070443926
ENSMUSG00000000776	5.942201534	5.777413948	7.032556889	6.546352596	6.06146183	6.424059102	10.22395493	9.042166649	9.171370191	10.29360504	7.832704649	10.08591212
ENSMUSG00000000782	1.401360214	0.937176315	1.514917228	0.774359678	0.897850756	1.293591726	2.229619141	2.623917155	2.914852722	3.434399823	3.246290773	2.613397766
ENSMUSG00000000787	36.80393839	43.90887911	38.56095832	39.38056009	40.1317872	39.18520562	45.63432434	33.64878541	39.74174687	49.46543988	42.76796401	53.9422434
ENSMUSG00000000791	0.256877164	0.230194652	0.03321062	0.101120457	0.240681111	0.432543629	0	0.016296664	0	0	0.073961028	0
ENSMUSG00000000792	8.231504	7.32448	5.913476	8.774467	7.499093	8.535964	3.279152	2.737187	2.37368	2.289715	2.459218	2.439457
ENSMUSG00000000794	1.669332011	2.437323461	1.969137621	2.613847895	2.259446247	2.22631677	2.919896646	2.268825104	2.874045423	2.635174346	2.225916433	2.514758902
ENSMUSG00000000804	13.98081171	16.14700914	15.32762256	18.5384236	17.50211597	17.3268388	13.36427875	12.18669973	14.36409826	14.04088576	12.52033913	12.97409917
ENSMUSG00000000805	20.11263421	15.03889313	19.12338692	18.06707484	16.61840806	15.43621855	10.76318936	10.92892468	10.44535845	9.507414668	8.974815204	8.952266817
ENSMUSG00000000811	1.661966	1.335729	1.118978	1.288882	1.092175	1.769237	4.519577	5.337922	5.352308	5.52931	4.979676	6.087739
ENSMUSG00000000817	0.036512	0	0	0	0	0.047207	0	0	0	0.095731	0	0.080341
ENSMUSG00000000823	6.110063817	6.606752061	7.156187979	6.881490007	5.966731794	6.489959531	13.1502867	12.72177259	12.40216925	13.11863539	12.29365693	13.40361283
ENSMUSG00000000826	19.63815925	18.75397203	21.18869158	20.90529325	19.73851623	20.38424448	24.25043615	22.61231042	23.17526688	25.36532512	23.34031325	22.7351123
ENSMUSG00000000827	5.365132084	5.806172165	5.32140274	4.419927449	5.402825974	3.731184349	3.844597069	5.09457706	5.660319056	6.431877882	4.401397207	5.57952467
ENSMUSG00000000838	5.414622391	5.919530612	5.150504947	6.128038274	5.722912996	6.125191481	4.84356845	4.782425375	6.397925276	5.579630593	5.013000644	5.574449848
ENSMUSG00000000861	6.243684822	6.083188367	7.245003135	6.987355556	6.035578485	6.431378163	11.96245619	11.748208	11.58191821	9.324899805	9.573062488	10.71125436
ENSMUSG00000000869	1.965715343	1.83118844	1.989399856	2.211724401	1.484498268	1.989415288	2.836157007	2.08812464	2.24715924	2.15964775	2.779438866	2.854375964
ENSMUSG00000000876	3.970013251	3.931810984	4.191879061	3.673696215	4.018677886	4.21028095	5.525781962	5.24272393	5.666076758	6.370242675	5.641360381	5.442727189
ENSMUSG00000000881	33.47776688	37.20269622	38.23572441	37.23537458	36.52953993	36.52725716	29.2002779	26.33438418	34.39650617	26.24252296	23.97364737	24.22409741
ENSMUSG00000000884	0.775455421	0.591323377	0.808785507	0.671706847	0.772864285	0.519157529	1.200359846	1.184475978	1.068618192	1.176062646	1.368700441	1.60763645
ENSMUSG00000000889	0.129956713	0.190670045	0.224115275	0.032431825	0.263564152	0.271734912	0.101714074	0.132164591	0.025108571	0	0.037818327	0.079472238
ENSMUSG00000000901	3.804141026	3.715515342	4.396496544	4.534651692	4.977875574	3.742601273	2.781751225	2.052903816	2.440874541	2.838218287	3.196561282	2.399574191
ENSMUSG00000000902	7.200190947	5.575281972	6.345266369	6.359353818	5.893512431	6.264309685	9.346519558	10.23754244	8.720242308	9.244404731	9.234882311	9.862236269
ENSMUSG00000000903	0	0.31179644	0	0	0	0	0	0	0	0.309250456	0.089038126	0
ENSMUSG00000000915	9.414368726	10.1527554	9.402250921	9.732609795	11.16112039	10.91505348	12.51658699	12.5368508	12.01820835	13.63850282	12.26238901	12.37730554
ENSMUSG00000000916	2.06873894	1.434855959	1.973234759	1.647578918	1.963821662	2.329491979	1.924106493	2.888660606	2.068225477	1.913233579	2.463501174	1.838797315
ENSMUSG00000000934	7.819853981	7.234031286	7.460395252	7.789510851	6.776374042	7.732580023	8.034407475	7.702896392	7.766151085	7.429521799	8.169033727	8.427768359
ENSMUSG00000000938	0	0	0	0	0	0	0	0	0	0	0	0
ENSMUSG00000000942	0	0	0	0	0	0	0	0	0	0	0	0
ENSMUSG00000000948	1.507193505	2.33605048	1.489763968	1.968081824	1.769947583	2.089259214	1.522767775	0.480658229	2.338309549	1.327182108	1.134748884	1.284421207
ENSMUSG00000000957	1.731946141	2.166259351	1.344189492	2.211282479	1.936445696	2.225598155	7.683295233	6.317964595	7.670295777	7.902118292	7.081286894	8.726148095
ENSMUSG00000000958	0.550767227	0.765942526	0.744635985	0.513040878	0.553478393	0.987745429	0.992324125	0.870693365	0.712228847	0.769932316	0.663911532	0.45367738
ENSMUSG00000000959	11.70245498	9.773817964	10.57067227	9.84957443	10.2161165	10.07849335	14.44155876	14.43724253	12.27426852	14.77272901	14.22264791	14.92276051
ENSMUSG00000000976	2.213674966	2.211969867	2.457815593	2.070989509	1.627944314	1.913135689	3.662312081	3.252211859	3.922856277	2.833364527	2.260236403	2.618674311
ENSMUSG00000000982	0.254517	0.238139	0	0	0	0.115791	0.38027	0.527332	0.250599	0.420407	0.821159	0.943679
ENSMUSG00000000983	0.323548055	0.308970252	0.168645585	0.194652286	0.511933234	0.655062122	0.064125359	0	0	0	0	0
ENSMUSG00000001014	1.369459419	0.704705673	0.857262276	1.395078481	0.483225998	1.034934313	0.350482887	0.505243425	0.179415432	0.430087939	0.740896619	0.197846061
ENSMUSG00000001016	7.643527702	7.022759107	7.785960299	7.238985775	7.357167253	7.441926857	11.88770729	11.77880097	12.033989	11.03119535	10.48717594	12.54654161
ENSMUSG00000001017	15.06208062	15.35570762	16.10626845	17.60741911	17.03925994	17.30808186	24.08577291	20.88064798	20.92384781	25.06556241	19.91284883	24.68966889
ENSMUSG00000001018	8.907986251	9.485179036	10.44980527	10.25949746	9.562319425	9.549969138	8.281942302	7.666855683	8.572029602	8.252728721	7.880274062	7.618209279
ENSMUSG00000001020	1.231487651	1.608909729	3.422304832	2.325403788	0.741941825	2.569892979	4.140707753	5.361160716	3.17275462	3.494822476	3.339818959	2.738019072
ENSMUSG00000001021	0.035830827	0	0.035769401	0.015425419	0.031602698	0.056543554	0.068971747	0.069941948	0.065721915	0.112864092	0.06489865	0.042891671
ENSMUSG00000001023	0	0	0	0	0	0	0	0	0	0	0	0
ENSMUSG00000001025	4.111798964	4.249796606	4.193763268	3.474039855	4.644189914	4.21631281	4.945401284	5.529303874	4.571067187	3.891969663	4.444602846	5.069341854
ENSMUSG00000001027	0	0	0	0	0	0	0	0	0.009902154	0	0	0
ENSMUSG00000001029	0.797986364	0.890665748	0.978920309	1.083993163	1.269040797	1.388121065	1.959021045	2.05319468	2.03549932	1.779524508	2.328458489	1.289743508
ENSMUSG00000001034	4.189261437	3.846340885	4.313130791	3.620439475	4.557350338	4.217642856	11.49014046	12.58721456	11.2151376	10.56301714	7.633964334	12.66642404
ENSMUSG00000001036	20.00785034	9.754690628	18.47913326	25.41166116	24.11916072	16.66076755	8.41657482	20.90929363	13.00576355	12.50269496	11.13594676	13.58609256
ENSMUSG00000001039	5.056404966	5.268425594	4.019534717	4.198850288	4.200259809	4.147680955	4.88216865	5.30591934	4.246349365	4.007197716	4.104883596	4.55061948
ENSMUSG00000001052	7.457540366	7.64158759	7.808733933	7.797509285	8.529817602	7.893315171	9.767864802	10.36677473	9.630018964	10.04294288	9.482406369	10.51801764
ENSMUSG00000001053	5.200008691	5.236609196	4.964783364	6.297616052	6.285196204	6.577590184	7.291966577	7.846282545	7.412961007	7.50163681	6.960434591	7.240289638
ENSMUSG00000001054	22.18461347	21.00908949	24.50267066	20.37814126	19.93246984	20.14836395	19.13273022	19.45220255	19.11678625	19.11353311	20.77928256	20.11238739
ENSMUSG00000001056	27.7184677	24.09068284	28.50840034	26.7022738	21.40600398	25.3459737	40.34127066	36.45018049	35.71711393	38.20751046	39.29928507	40.5795328
ENSMUSG00000001062	4.913130043	4.76113123	8.425580275	4.422799708	4.986918371	6.083560315	7.879096893	7.45460258	4.939107604	6.367195584	7.841186903	5.886325142
ENSMUSG00000001065	1.182338154	1.83724932	1.644082793	1.749930143	1.800272544	1.677053376	2.08302925	1.360745424	1.25634118	1.620238658	1.327431711	1.762150398
ENSMUSG00000001076	0	0.052365	0	0	0.182331	0.062035	0	0	0	0	0	0
ENSMUSG00000001082	2.675659979	2.223297749	2.779479724	1.938826771	2.66157938	2.103764011	3.137641563	3.094785774	2.948228961	3.132552806	2.746836112	2.866675142
ENSMUSG00000001089	12.48623449	13.79203889	15.27110845	16.39543203	16.66805039	15.90595813	7.727055183	5.615868796	8.682924697	9.285986096	7.070513905	7.191063242
ENSMUSG00000001095	0	0	0	0	0	0	0	0	0	0	0	0
ENSMUSG00000001098	11.59812824	12.94621845	12.01408138	13.28402826	11.76960894	13.54571034	13.67206083	13.64938644	14.66348617	15.02238137	13.62476134	13.72255348
ENSMUSG00000001100	24.39078362	22.59532672	22.61521705	24.57388259	23.67421129	23.13611983	23.5541622	24.6560411	24.42008947	25.21132972	23.49718481	24.28917376
ENSMUSG00000001103	3.917607731	2.363648561	3.496712081	3.340466297	4.48014067	3.60484974	1.601496674	0.766549845	1.537674599	1.662374185	1.77477659	0.971818339
ENSMUSG00000001105	18.34343401	19.46261036	17.67985348	13.66752266	15.56486864	17.26782051	14.68936687	15.7022733	14.50033166	15.85313779	14.66660071	12.61694585
ENSMUSG00000001119	2.039591684	2.778078042	2.33088891	2.914245228	2.289441929	2.143420605	4.912222392	3.047103676	5.798770554	4.722346427	4.928977546	4.615968761
ENSMUSG00000001120	13.8985808	11.29075343	11.80095109	14.22043799	12.4396093	11.54885423	12.14476056	11.20867926	13.13371419	11.83681664	12.55671632	12.46443672
ENSMUSG00000001123	2.833271434	3.076339878	3.077495375	4.599130596	4.737778517	4.261301151	3.990160749	3.03642738	4.595805377	3.348822723	2.645706192	2.99954074
ENSMUSG00000001127	10.62210557	11.99909431	11.948881	11.50273144	10.58210762	11.95737752	14.28987169	10.52661336	11.88436678	12.35917397	12.05927687	11.30784252
ENSMUSG00000001128	1.354030311	1.084347684	1.072792864	1.40504882	1.64534009	1.575272924	0.877193021	0.634874491	0.871611041	1.040044592	0.68153723	1.799527281
ENSMUSG00000001131	0.174089495	0	0.182392202	0.104218885	0	0.243356988	0.39321939	0.547835981	0.234860292	0.222910681	0.776900788	0.870401934
ENSMUSG00000001134	2.275422129	1.417495798	1.435246434	1.615201671	1.650823547	1.745737951	1.292637424	1.797205719	1.309610671	1.174240165	0.750218024	1.975431715
ENSMUSG00000001138	3.636377418	3.768475545	3.199322064	3.950744337	3.149685934	3.408187026	4.973877387	5.203297337	4.85762729	4.261957103	3.7420943	4.943488217
ENSMUSG00000001143	6.675032272	6.920709037	7.294432351	7.328160553	7.259682243	6.990155099	7.374760325	6.125194375	7.362400985	7.347649617	7.134466149	7.131091644
ENSMUSG00000001150	6.339655345	6.663558233	6.616494921	7.282694184	6.779632097	6.6403465	8.953393905	8.355045802	8.03772509	7.485961924	7.204153765	7.98702818
ENSMUSG00000001151	1.945869981	2.474409096	2.451501781	3.044529791	3.069971535	2.587977886	1.686589856	1.314398423	1.75275497	1.449164751	1.311764739	1.579597285
ENSMUSG00000001155	0	0	0	0	0	0	0	0	0	0	0	0.048753813
ENSMUSG00000001156	2.675614152	2.902657964	2.811625809	2.833623078	3.005042996	3.543248257	2.323860623	1.986506032	2.044589005	2.7548944	2.843693294	2.583152993
ENSMUSG00000001157	3.619894572	3.326577198	3.734887566	3.204663738	3.611413555	3.320041472	5.60372506	4.205250055	5.291203485	4.909650788	3.953544978	4.205874547
ENSMUSG00000001158	12.43263066	13.68064702	15.02867866	14.22347586	12.84333502	16.48707011	13.51698138	15.26534655	13.33716216	12.22949126	12.6093968	14.18410079
ENSMUSG00000001166	0.176342223	0.208288575	0.032437893	0.560358595	0.1487502	0.242569746	0.354836367	0.366782908	0.549632333	0.32483808	0.503618956	0.435694854
ENSMUSG00000001168	0	0	0	0	0	0	0	0	0	0	0	0
ENSMUSG00000001173	6.019448425	6.431414137	5.543921041	6.420891516	5.960505769	6.036926595	5.869941556	5.722658448	6.118032541	5.869997291	5.40534228	5.929392779
ENSMUSG00000001175	159.5625381	178.7834936	181.4747721	180.5574668	171.8784561	179.8963725	172.9821021	159.2701036	180.0562153	181.14419	165.515126	164.6653872
ENSMUSG00000001211	28.89803458	30.06402313	29.86915297	33.61122563	32.33610929	29.86979021	36.50758712	32.92407591	35.81047343	36.0530673	33.08698918	33.27265041
ENSMUSG00000001225	0.03808754	0.029651096	0.040773639	0.013708099	0.047461002	0	0	0.022344891	0.009742431	0.041155122	0	0
ENSMUSG00000001227	37.13539294	33.74979532	41.47638633	39.2795479	33.39350674	35.65780174	32.54633798	30.92542341	31.84392235	34.74541907	31.42658079	31.44063538
ENSMUSG00000001228	0.288712105	0.507445581	0.46959814	0.281400039	0.383350894	0.490219725	2.238482934	2.836907459	2.51139866	3.3872835	2.220443969	2.743179268
ENSMUSG00000001229	11.80632287	10.86257065	12.65127041	11.83314721	12.27147379	12.74980172	7.646863004	8.097637641	8.41944662	6.669629055	6.813438108	6.521373792
ENSMUSG00000001240	11.50098651	8.522521597	10.238856	10.72784972	9.008768601	12.30505482	12.15835113	12.00100697	12.70825877	12.52920787	11.63920885	11.11429411
ENSMUSG00000001247	3.384013306	3.285653314	2.999668928	4.754607257	4.567088779	4.223189461	5.041225262	5.364844104	5.214452919	6.306698073	6.898478143	7.12213843
ENSMUSG00000001248	12.34118799	11.04272714	12.99169768	11.90215673	9.990005808	12.43967843	17.02205893	17.43636732	15.77789311	18.29175372	19.27702664	22.22377862
ENSMUSG00000001249	0.033915718	0.056400413	0.131133198	0	0.076142793	0.183365878	0	0	0.040461316	0.089383133	0.037424774	0.05616142
ENSMUSG00000001260	1.59019725	2.336159459	1.678508983	1.697300892	1.37180371	1.701731209	1.770830585	1.667810918	1.622368043	1.628166596	1.595658578	1.761651259
ENSMUSG00000001270	239.3595965	219.6091435	235.6645861	250.3230784	272.1697375	279.8348872	189.5101043	186.3582978	180.1492887	190.7077802	198.365848	180.7525014
ENSMUSG00000001280	2.648491226	3.126391644	2.734641504	2.342105528	2.956934698	2.929888902	3.203270989	2.933732779	3.47998051	4.390173429	3.540015201	3.732975528
ENSMUSG00000001281	0.265794519	0.445560081	0.251806578	0.311827407	0.282108869	0.36223443	0.166632717	0	0.099333958	0.14109032	0.291593488	0.112361522
ENSMUSG00000001285	6.219507897	6.18189373	5.891731078	5.302657375	6.34612044	6.577509439	5.438143194	7.311459883	5.936208862	6.413837084	5.772963194	5.483236719
ENSMUSG00000001288	1.865753424	2.07527313	1.625661194	2.02501515	1.279689232	1.462086587	2.024638034	2.71102149	2.389402862	2.499523562	2.190987524	2.545530461
ENSMUSG00000001289	70.81031238	66.90937281	71.24256134	57.50583722	62.77148181	61.18669951	65.82494138	71.46050547	67.21732362	68.89797168	69.18809873	76.97371813
ENSMUSG00000001300	5.303555466	5.575132969	4.612260811	6.516024285	5.050228842	5.339605898	10.15406242	9.064857162	9.400754343	8.148997651	9.005925487	12.00171341
ENSMUSG00000001305	1.98798328	1.848844297	2.029731706	1.565182007	2.159437351	2.401766145	3.163767373	2.961874734	3.237558705	2.924491934	2.757155142	3.202194973
ENSMUSG00000001313	36.02160373	20.76123091	20.16406539	16.54308731	17.89577862	20.21524903	28.44741554	29.35503189	23.25785211	28.2976817	28.30361128	26.60018524
ENSMUSG00000001323	18.6772858	18.83230375	19.05829069	19.68630152	20.2812979	18.58383458	18.80454896	15.54475794	19.86958511	19.15875716	17.64594411	15.89314538
ENSMUSG00000001333	0.53507266	0.464594516	0.482782641	0.577022321	0.75684579	0.507623008	0.919404435	1.004593559	0.542896539	0.891281658	0.86570169	0.958315939
ENSMUSG00000001334	32.184093	26.649441	34.425518	25.624233	28.637014	30.243235	11.528683	12.69065	14.726539	14.424196	14.289935	12.369599
ENSMUSG00000001348	0.108274092	0.340806992	0.135103467	0.086017378	0.518063066	0.57145508	0.168408703	0.105158408	0.171377548	0.044302435	0.141024763	0.038330531
ENSMUSG00000001349	0.551593938	0.898858532	0.82093475	0.514064196	0.374135511	0.25811913	0.085304372	0.035979556	0.055266874	0.220374778	0.195962131	0.110914365
ENSMUSG00000001366	20.86977461	19.93723781	20.68890452	20.96869224	22.15096262	23.59306402	21.83438796	21.02127768	18.68386792	17.52016659	20.21187157	19.21749359
ENSMUSG00000001376	4.636286958	5.027672205	5.030149431	4.840661795	4.584274124	5.061857381	4.738693381	4.672055851	5.608738736	4.678654553	3.975419256	4.693668288
ENSMUSG00000001380	43.138844	39.915836	45.186901	38.894127	38.410896	44.691795	61.454727	53.996925	58.718124	59.482544	55.883911	58.927254
ENSMUSG00000001383	80.635094	73.644714	80.317345	71.633018	68.614601	74.954849	52.989769	50.016701	55.871807	54.803932	51.871719	54.986336
ENSMUSG00000001403	0.3646769	0.16298004	0.381169828	0.248266089	0.240961523	0.205972116	3.099018169	3.734711403	3.304663364	2.898071683	2.741467687	3.757991023
ENSMUSG00000001415	9.745234535	9.206460618	10.10888685	10.48200572	10.81920806	11.34534263	11.32641037	11.11211692	11.41720754	12.89599852	12.18189238	13.19244043
ENSMUSG00000001416	15.74825313	14.39099285	14.55914634	13.95093797	12.8361946	14.72577608	25.02952007	23.00209176	23.42913401	23.96772273	23.49477978	24.39147864
ENSMUSG00000001418	4.156074118	4.881589775	3.683394636	4.564752818	4.615095889	4.31233741	3.649392553	3.609905405	3.882274262	4.100988502	3.664715163	3.405944901
ENSMUSG00000001419	33.57058414	32.79080108	43.07745195	42.52256166	35.30918403	33.46534209	13.8877302	20.67049188	22.18786331	22.24721606	22.61853491	20.40402545
ENSMUSG00000001420	0.442985635	0.455197272	0.462200363	0.565894623	0.395347837	0.556512806	0.530429115	0.55415158	0.474694242	0.46008796	0.477363044	0.546821281
ENSMUSG00000001424	9.578701706	8.705597406	9.931420115	8.102156426	8.980887482	9.326490057	12.14846372	12.54148377	12.75384146	14.16692541	12.93659235	13.03218142
ENSMUSG00000001435	1.083120201	1.839964111	0.767490645	1.613009025	1.586939182	1.424604374	3.4859738	2.783390146	3.305417272	3.739117727	3.609404284	2.833012132
ENSMUSG00000001436	3.03247179	3.496827458	2.62607969	3.409836411	2.974759404	2.6765507	4.505103677	4.60528239	3.90510911	4.786521737	4.237787991	3.937286125
ENSMUSG00000001440	26.88758929	29.45622557	29.42695449	29.09281628	30.61252711	30.94622598	39.27679813	36.90748839	41.69611175	39.05865577	35.6335644	37.04813665
ENSMUSG00000001441	12.28850171	14.50472248	11.89134885	12.6967402	12.50322997	11.97586747	13.9735819	13.2967419	15.27683411	13.9968718	13.37226741	13.49328358
ENSMUSG00000001444	0	0	0.065098	0.175457	0	0	0	0	0.138615	0.037265	0.169024	0.124784
ENSMUSG00000001445	28.986752	25.659369	30.083906	26.504549	25.665983	27.210926	25.540033	22.470585	22.79546	20.518366	22.80917	21.464035
ENSMUSG00000001467	16.44228756	18.95002256	15.57218617	15.31795169	17.70636549	19.74315663	35.81114648	38.26264499	36.99251296	43.22870196	43.63921748	42.38959699
ENSMUSG00000001472	74.22782738	69.66620473	75.24179058	75.59286623	74.94556286	64.43864133	66.04723585	59.20990405	66.32302808	62.95513353	67.25997413	59.05543681
ENSMUSG00000001473	2.594117	3.68223	2.160376	2.118501	2.958043	2.874263	5.608176	5.629765	5.462696	6.804218	6.572762	7.759099
ENSMUSG00000001482	10.04429508	10.67984512	10.68695121	9.833172945	10.71700021	10.60753686	15.04780544	13.63404425	15.22120312	15.67587109	13.29874832	14.50760511
ENSMUSG00000001493	0.434771	0.37946	0.353661	0.312447	0.53987	0.24515	1.6151	1.063313	1.15478	1.020647	0.867969	0.957496
ENSMUSG00000001494	0.03389	0.163761	0	0	0	0.08837	0	0.068884	0	0	0	0.027368
ENSMUSG00000001496	0.111816195	0.184861077	0.197943568	0.088270008	0.149623358	0.063704601	0.408597841	0.535056219	0.416218657	0.251529049	0.552099132	0.683464967
ENSMUSG00000001497	0	0	0	0	0	0	0	0	0	0	0	0
ENSMUSG00000001504	0.043097349	0.023282678	0	0.02660192	0.081887683	0	0.062611504	0.065043533	0.130570762	0	0.151904479	0.223805389
ENSMUSG00000001506	1.53721756	1.996807512	1.029567186	1.706061939	1.909413538	0.995336587	8.075524129	3.663299174	11.23585097	7.028060236	6.756727568	5.635431732
ENSMUSG00000001507	3.088552991	3.567030267	2.42670681	3.375073023	2.982372224	3.066262795	3.832042541	3.907525371	3.963781188	4.056360378	4.264382753	4.199294521
ENSMUSG00000001508	0.283843168	0.130051207	0.250025708	0	0.281750289	0.209107341	0.176906803	0.035090107	0	0	0.042608138	0.089694702
ENSMUSG00000001510	0	0.103624	0	0	0	0	0	0	0	0	0.028553	0
ENSMUSG00000001517	0.335648506	0.225074095	0.420762108	0.126915951	0.314458496	0.158668849	1.587860688	0.606375386	0.751711264	0.738127698	1.580494801	1.847696575
ENSMUSG00000001518	1.895479465	2.427051677	1.486151138	2.131566202	2.311908328	1.906989052	1.849761058	2.031316365	1.617694887	1.616454767	1.512322563	1.57026733
ENSMUSG00000001520	2.940300031	4.810660432	4.048228041	4.421972415	3.845722141	3.782734068	0.874459194	0.769206713	1.069327237	0.915085064	0.993133294	0.817198788
ENSMUSG00000001521	1.700605028	2.021867889	1.510158833	1.823141108	2.115654893	1.801605989	1.732600862	2.139540925	1.825247258	2.674822995	2.572613958	2.477099353
ENSMUSG00000001524	2.783699362	2.142330802	2.690474914	3.034550968	2.93824027	2.954818202	2.451416082	2.755915453	2.285846319	3.159742202	1.844404477	2.054318277
ENSMUSG00000001525	131.4409795	110.5839957	127.1904411	110.9460492	106.8270494	115.7384498	576.9870402	633.498902	545.3979216	560.7296956	562.4680294	624.8388293
ENSMUSG00000001542	2.012294336	2.115153137	1.738751349	2.03771035	2.012235922	2.178592253	0.7837151	0.659631591	0.780743623	0.795934548	0.689394922	0.812686252
ENSMUSG00000001552	4.771255326	3.847318304	4.329582952	4.470428466	4.61660654	4.119935331	7.38168049	8.909040726	8.004995076	6.871781567	7.879317725	7.767664408
ENSMUSG00000001555	3.152587318	3.265805347	2.942687284	3.033895436	2.25764139	2.899490333	6.960585716	6.62865677	7.065981454	8.922850159	8.263287794	6.952385321
ENSMUSG00000001558	0.275461905	0.051790512	0.279135626	0.121204406	0.082772602	0.210579093	0.07240386	0.065855518	0.195382529	0.044333865	0.071022481	0.179673539
ENSMUSG00000001566	0	0	0	0	0	0	0	0	0	0	0	0
ENSMUSG00000001569	2.72439064	3.136687321	3.347267666	3.26468129	3.043572838	2.949094708	2.807348842	3.037722844	2.776373482	3.237944904	2.787443691	3.235805291
ENSMUSG00000001576	18.23382647	18.50191111	19.21881387	18.28061181	17.48720749	17.32431335	28.17207746	28.43764637	27.16619209	28.72448329	28.16130759	29.23002067
ENSMUSG00000001583	0	0.069557649	0	0.047286083	0.053820934	0.033601366	0.058360531	0	0	0.128244233	0.07769471	0.062426976
ENSMUSG00000001588	0.057799868	0.01882972	0.029905979	0	0.006183121	0.018057847	0.015342825	0.029076961	0.00938713	0.032934599	0.031410805	0.029115926
ENSMUSG00000001604	0.845981601	1.370040692	0.057844453	0.681725301	0.830583579	0.681655603	0.387475804	0.224708019	0.490852189	1.151106756	1.305666913	0.277708596
ENSMUSG00000001622	0	0	0	0	0	0	0	0	0	0	0	0.056221329
ENSMUSG00000001627	5.254306239	4.646203961	5.622616782	5.44651044	5.346057858	5.868628502	6.252449505	6.422824837	6.763981047	6.127463131	6.101886946	6.511934701
ENSMUSG00000001630	4.240917008	5.492430453	4.361873023	5.555053415	5.311587279	5.505664352	3.063214223	2.873628955	3.875469864	3.87211665	4.092801377	3.784734782
ENSMUSG00000001632	3.966493577	3.812611716	4.095270735	4.721268073	4.609221782	4.542522731	2.958959027	3.091033781	3.426582224	4.802552625	3.877114898	3.867963519
ENSMUSG00000001642	3.962402261	3.294874798	3.484594967	3.441828351	3.159507483	3.678162419	4.803978139	4.828765809	4.098597819	4.969411251	4.237816004	4.514057879
ENSMUSG00000001655	0	0	0	0	0	0	0	0	0	0	0	0
ENSMUSG00000001656	0	0	0	0	0	0	0	0	0	0	0	0
ENSMUSG00000001657	0	0	0	0	0	0	0.013812119	0	0	0	0	0
ENSMUSG00000001661	0	0	0	0	0	0	0	0	0.028760018	0	0	0
ENSMUSG00000001663	4.641275903	4.992297962	2.784733497	4.973512541	2.288293649	4.445079562	1.841301351	1.903193757	2.580607743	3.034489323	2.41350952	2.185785692
ENSMUSG00000001665	0.636666864	0.867644515	0.177321974	0.364575977	0.565368053	0.611548001	0.20321778	0	0.117549707	0.163615423	0.279566784	0.177682319
ENSMUSG00000001666	20.9991531	18.85101028	18.21487112	14.79482141	20.07188485	18.67025555	14.12675701	14.58308889	15.90871954	18.73620248	12.80579332	15.23458958
ENSMUSG00000001670	0.058813098	0	0.033560083	0	0	0.148532796	0	0	0	0	0.095724844	0
ENSMUSG00000001672	0.22562209	0.192023374	0.04770499	0.371313168	0.353903011	0.132907635	0.020050646	0.108123108	0.203259875	0.170242082	0.046034296	0.023235323
ENSMUSG00000001674	6.515447732	6.410309097	5.927710571	7.431613322	7.045178161	7.031413568	7.992298629	8.420745642	7.97211048	7.54734062	7.738474402	8.655048807
ENSMUSG00000001687	15.60614403	15.77574452	16.64105817	14.46289381	15.65505315	15.06034336	7.100838968	7.179864099	7.399208965	7.434944534	7.523852338	6.480053248
ENSMUSG00000001700	6.423215	7.867032	6.668567	4.854192	6.974809	6.112073	6.325236	5.588733	5.647567	6.974482	6.003957	4.901357
ENSMUSG00000001707	6.73568592	6.712120891	6.904692609	5.758806971	6.31819829	5.818614041	11.6425927	12.66155001	13.9159316	11.57720936	11.74752748	12.82856139
ENSMUSG00000001729	34.4955987	32.58849906	35.54335898	37.50883337	35.87254188	36.99641599	58.78925622	61.82586136	57.32395924	58.32402903	54.99808816	59.37954288
ENSMUSG00000001739	0	0	0	0	0	0.043050212	0	0.002353322	0.027563777	0.043651079	0	0
ENSMUSG00000001741	4.749598994	4.794740255	5.374130065	5.866512542	5.788229722	4.880278821	3.240183858	2.958520857	4.518533752	2.91580345	2.425342113	2.331890552
ENSMUSG00000001750	1.828768578	1.611028723	1.251073395	1.437259227	1.206952547	1.347794271	1.347493481	1.13951318	1.342045457	1.226097436	1.337779815	1.376608517
ENSMUSG00000001751	3.583187118	4.793965989	2.956832389	3.347112355	3.514653664	2.040537144	2.210977881	2.740454959	2.776928158	3.966162348	2.590029347	1.916961324
ENSMUSG00000001755	8.340363106	7.858437941	6.603247316	7.750075533	6.394710869	7.004147563	11.91283901	12.84728606	14.22305077	12.69829925	12.45782015	11.56267797
ENSMUSG00000001761	3.627349154	5.589673462	3.355599343	4.319860223	4.016753372	3.464434995	4.658610529	5.162243611	5.334046353	6.004045712	5.017075614	5.344282516
ENSMUSG00000001763	6.034407675	5.599330308	4.269368052	7.598672499	5.538955008	5.407427692	1.830263022	2.36354291	2.123555746	3.119079106	2.64334609	2.365348465
ENSMUSG00000001767	4.012176874	4.217152014	3.437071794	4.360374551	4.756711012	4.044261463	4.042802881	3.237185425	4.745547188	4.880104301	3.87902927	4.501220763
ENSMUSG00000001768	4.561749469	5.234463167	3.945399711	6.31864184	7.163390327	6.338124274	2.500238342	2.904538815	3.088410403	3.130281651	2.347129319	1.982431865
ENSMUSG00000001773	1.319201055	1.986488302	1.194401488	1.444836145	1.128328651	1.67709204	0.566882352	0.309603777	0.726144927	0.521739231	0.480039882	0.480678544
ENSMUSG00000001774	5.838615018	6.751379981	6.053214011	6.513629083	6.481376286	6.520715818	4.739951315	4.361092954	5.331372955	3.274315401	2.987682433	3.283299283
ENSMUSG00000001783	37.71177255	37.09395525	38.09350831	38.25410863	39.49508775	39.09757203	44.70647507	46.83135025	42.99982319	45.2606504	46.6772594	47.29443484
ENSMUSG00000001785	6.265743637	5.994226972	6.067772816	5.743028217	6.618562048	6.431404972	10.67294932	10.70858454	10.37076189	10.20714938	8.940978703	10.99225039
ENSMUSG00000001786	4.612573243	4.262059916	4.659862732	4.56992767	5.344970831	4.922070724	7.507041022	7.428503556	7.407367519	6.601401087	6.719536022	7.952053667
ENSMUSG00000001794	65.22764118	33.18646781	33.41658441	55.65011537	54.86710739	36.25101742	53.31889556	37.87286532	50.14763688	50.7234067	54.22683125	54.7273768
ENSMUSG00000001802	16.30702247	14.36178515	15.74666725	14.34326541	12.72959876	9.759142216	17.24093016	18.10437003	18.15745837	17.89531322	19.81850781	20.56125305
ENSMUSG00000001804	0	0	0	0	0	0	0.044987	0	0	0.026658	0	0.021775
ENSMUSG00000001815	0	0.018417	0	0	0	0	0	0	0	0	0	0
ENSMUSG00000001819	0	0	0	0	0	0	0	0	0	0	0	0
ENSMUSG00000001823	0	0	0	0	0	0	0	0	0	0	0	0
ENSMUSG00000001827	6.739343614	8.58644913	0.343977153	6.187297686	7.192956012	5.987200879	0.289394916	0.528912262	0.241850973	5.868421921	4.819030205	0.250104938
ENSMUSG00000001829	3.912479849	4.395629559	4.31559238	4.323045034	4.449694931	4.044416168	4.211921144	3.563192198	3.987659058	3.914891107	3.278905526	4.202140103
ENSMUSG00000001833	20.14351105	22.78676481	19.26087612	19.9124851	14.08002627	21.66766576	13.64493585	12.64994392	15.63756392	13.59792227	14.4629223	14.59188846
ENSMUSG00000001844	5.209879355	5.046105998	4.825724663	6.308972697	4.462174884	4.843925022	5.085277488	5.437702341	4.576723743	5.501984053	5.684228207	5.353181808
ENSMUSG00000001847	18.47703235	20.99370835	21.9629863	23.93372537	19.60629312	19.17156203	20.36477157	21.42434004	21.55641522	22.1659705	25.25148968	26.06064721
ENSMUSG00000001855	3.353236136	3.527038139	3.165090959	3.597838016	3.517891763	3.258671505	3.731315512	3.361579095	3.820874312	3.851486915	3.90084495	3.649020645
ENSMUSG00000001864	1.863208557	2.108034747	1.615068255	1.121629668	1.453231975	1.69549785	2.743707153	2.764945587	3.062364658	2.92273197	2.654875511	3.261010068
ENSMUSG00000001865	0.0929299	0	0	0	0	0	0	0.182935056	0	0.060506496	0	0.229101514
ENSMUSG00000001870	0.561521089	0.59802793	0.633418731	0.64263149	0.522342328	0.500342042	0.580828198	0.41717742	0.481034413	0.685876714	0.574631813	0.506859738
ENSMUSG00000001891	20.3119842	22.03201522	20.49327705	16.97123965	18.81233053	18.92646082	19.00127989	19.34503557	19.15350741	20.43531911	18.52999167	19.69623913
ENSMUSG00000001901	0.31302785	0.398089249	0.26922173	0.413699345	0.251509599	0.316180134	0.542346696	0.473639116	0.624045133	0.479841779	0.26513249	0.42494689
ENSMUSG00000001909	3.741811065	3.256712373	3.635655359	3.446741929	3.416427094	4.451304209	4.544493628	4.289981058	3.952368156	4.526104989	3.413711788	5.033860233
ENSMUSG00000001910	31.821135	31.710314	36.828506	33.299011	34.544971	31.622019	28.124111	28.0567	28.17709	28.957733	28.669672	30.777941
ENSMUSG00000001911	41.25865935	35.65877161	40.10985075	39.03501515	37.47478737	37.16060354	102.5483359	104.1490559	90.23125486	94.15254122	100.9293518	114.2417566
ENSMUSG00000001918	0.443420776	0.789423297	0.540413905	0.402008333	0.35577451	0.390018877	0.712026927	0.904826923	0.967516921	0.679403601	0.983765639	0.632049639
ENSMUSG00000001924	74.22902059	67.87531173	70.88335564	65.95891424	67.24509178	69.70972223	99.79341004	101.0604126	98.31757346	100.2077814	99.9442247	106.1358451
ENSMUSG00000001930	1.291843915	1.97167632	1.32170048	1.69475274	1.964275045	1.572808086	2.293590736	1.478805672	2.142379446	1.693554095	1.902969656	1.316492564
ENSMUSG00000001942	1.291197956	1.675959841	1.87311851	1.61881167	1.611939334	1.562780141	1.929751705	2.01412453	1.935373153	1.881700331	1.616966367	1.971961202
ENSMUSG00000001943	1.915734193	1.447453002	2.157805581	1.781399186	2.698740407	2.305159615	3.859114672	4.113354539	3.458009558	5.291630572	3.392019497	3.715655494
ENSMUSG00000001946	4.208261092	4.14227673	4.06845561	4.234164641	4.881481738	5.058412926	6.222309366	6.701603695	7.37807722	7.582759164	6.440073932	7.52524472
ENSMUSG00000001948	0.955895921	2.412170902	1.646016542	1.474613067	1.159667791	0.941679774	1.535921077	2.118973811	2.572558938	1.734839314	2.255515129	2.104516455
ENSMUSG00000001962	7.96001927	7.589521469	7.154494029	6.107750959	7.38398884	6.40939063	11.60258138	12.99774752	12.95738257	12.30675458	11.69406168	12.79163429
ENSMUSG00000001964	12.08318685	8.726805093	9.137609114	11.87200748	9.336600111	11.18939395	14.75212067	13.84360986	12.16011085	14.47251978	13.70727714	17.48507368
ENSMUSG00000001983	10.673396	9.031472	9.283377	9.125506	7.948019	10.150731	10.68228	9.705872	9.418821	9.824958	8.51218	10.096217
ENSMUSG00000001985	5.346591	6.869495	5.817514	7.485736	5.468431	5.903225	14.805321	12.827111	13.308698	10.967357	10.917848	12.917781
ENSMUSG00000001986	13.43291192	13.79374296	14.5738091	13.60739698	13.30331259	8.470440342	3.93264681	4.300510171	6.479263841	5.762728068	2.9419104	5.636165832
ENSMUSG00000001988	5.011901318	4.914869833	5.22422907	4.684665949	4.166751218	3.852447276	8.544363838	9.029564646	7.63861457	8.96942262	8.021671673	8.952451288
ENSMUSG00000001995	9.118333003	9.116266549	8.437332581	10.48539054	10.34018704	9.330956417	5.567232948	5.171458466	5.353447882	6.123235856	5.259890436	6.229478545
ENSMUSG00000001998	0.510566818	0.682584032	0.539851017	0.612668297	0.766127497	0.695883697	0.783173312	0.74560937	0.946431406	0.903036391	0.751074115	0.859811807
ENSMUSG00000001999	4.560340234	3.824575323	4.243598497	3.828077307	4.170293179	3.752467228	4.072686306	3.644902039	2.816773483	2.99607824	3.188464571	3.308101487
ENSMUSG00000002006	31.02642167	28.04375249	33.27820349	31.66480879	27.83013251	31.49435411	47.64306439	49.66876727	42.09859057	45.58655746	42.68070261	48.63994775
ENSMUSG00000002007	0.16186145	0.289967574	0.409065549	0.263868196	0.365657341	0.127802048	0.04333997	0.134268507	0.050085335	0.144331195	0.027196666	0.05478042
ENSMUSG00000002010	27.79925112	23.61401672	26.46480469	24.84194753	24.80170882	23.53783736	18.01884283	17.55152322	18.20743642	18.70243772	17.83985987	18.75872738
ENSMUSG00000002012	34.03688492	33.93194285	29.85920073	33.84495865	24.04302136	27.43253671	31.93029078	34.44954359	31.66885264	30.15294568	30.81744092	34.14376836
ENSMUSG00000002014	9.013109328	9.321011308	7.871074494	6.462765504	6.589617791	6.171132971	9.228895973	9.896222352	8.376817641	8.446322916	8.387265643	7.232910372
ENSMUSG00000002015	43.294109	40.110046	38.559418	34.881187	40.612473	39.873188	32.223873	32.06395	32.839249	37.447212	33.703255	31.387379
ENSMUSG00000002017	7.982622708	7.54286115	7.805075539	7.471831648	9.752405654	8.594466182	14.92542556	12.84210442	14.11510161	12.99730987	11.51576557	12.88765275
ENSMUSG00000002020	0.025513605	0.018107737	0.019790061	0.021229218	0.034262686	0.033444683	0.315223557	0.160040036	0.218258895	0.134933741	0.134754711	0.145629444
ENSMUSG00000002028	4.742792886	6.682002719	5.796357026	7.563568724	7.929996317	6.939189692	6.760209905	5.137018867	6.841494546	6.098564361	5.336015337	6.997299813
ENSMUSG00000002031	3.848831025	4.658804237	3.899570927	3.762605041	3.756515376	4.280574715	5.412490518	4.595259902	3.913979187	5.015418654	4.376140764	5.199054375
ENSMUSG00000002032	11.31745006	9.659461691	11.45096951	9.916659271	10.85036626	10.43669823	3.576441349	3.451517455	3.305450464	3.89215191	3.970953238	2.606991811
ENSMUSG00000002033	0	0.047222606	0	0	0	0	0.023931753	0	0	0	0	0
ENSMUSG00000002043	2.286275755	2.448848875	2.049903502	2.947609714	3.462854336	2.442063046	2.521377152	2.642402901	1.969807131	3.581658789	2.398952882	3.147642143
ENSMUSG00000002052	29.56086174	32.24343767	34.01266121	35.18494947	34.98500589	30.99639928	22.602876	18.87172004	22.42400419	26.58999896	21.66588416	25.39229437
ENSMUSG00000002055	0.527754262	0.715049732	0.527279054	0.556125464	0.765446276	0.648927024	1.122196818	1.18391804	1.382505302	1.590496233	1.021424423	1.091795832
ENSMUSG00000002057	0	0	0	0	0	0	0	0	0	0	0	0
ENSMUSG00000002058	7.16099941	6.880378067	5.484071941	7.41132131	5.654173298	6.139943587	9.877437906	13.00893959	8.033492525	10.31663445	9.758712062	11.84740418
ENSMUSG00000002059	3.727107779	3.616336262	3.028549128	2.748032862	3.082941513	3.084047399	5.041864894	4.082330877	4.51594803	4.682760063	4.936819373	4.028557011
ENSMUSG00000002064	31.31789848	27.1555938	30.63952914	25.26710194	25.44387167	24.51934037	30.7568433	31.72581164	34.5642107	28.26034979	33.50730572	31.33108826
ENSMUSG00000002068	4.821786972	3.62555834	4.707112657	4.356007197	3.732331165	4.168896165	2.861652337	2.460748253	2.781531883	3.667146946	2.763806784	2.788502059
ENSMUSG00000002076	0.032749183	0	0	0.028191684	0	0	0.143798493	0.023855022	0	0.060292827	0.051365878	0.149138968
ENSMUSG00000002083	3.972432155	1.797758527	3.207840293	2.663259858	3.280799194	3.057498011	13.52704566	14.92992881	12.44336913	11.41790326	13.14350359	12.38581194
ENSMUSG00000002100	0.050003	0.091653	0.06614	0.072624	0.083571	0.021965	0	0.042504	0.015533	0	0	0.065418
ENSMUSG00000002102	42.95780586	39.43413909	40.32518094	39.14483884	46.5425664	47.51655957	44.24003172	41.57948779	43.46905511	39.86606342	42.52779545	38.92432598
ENSMUSG00000002103	15.70844891	17.24350969	16.81781017	17.54209409	15.44284717	16.66500242	16.40107545	16.458297	18.15745311	14.80146432	15.69426074	13.06786157
ENSMUSG00000002104	0.267664365	0.042833499	0.133557349	0.316999413	0.044039123	0.253715024	0.200284759	0	0.036368503	0	0.042585737	0.172719863
ENSMUSG00000002105	3.960200675	4.103954582	3.343178911	3.87987021	3.349788622	3.160499791	2.880328507	2.874567929	2.864730709	3.030385938	2.998330971	2.774631631
ENSMUSG00000002107	7.599253194	8.17641985	8.679361055	8.534212281	8.368990469	8.423348202	11.57316028	9.167655007	12.99215951	10.72168839	9.342948979	10.03578538
ENSMUSG00000002108	0.992979509	0.727702538	1.379551805	1.047861505	0.558843838	0.717115848	0.979187538	0.336999462	0.426463758	0.237227513	0.281673011	0.418743938
ENSMUSG00000002109	3.96417886	3.621126535	5.996005477	4.198793958	3.249713973	3.148351746	4.166366385	3.498353546	3.383955927	3.375903975	3.977032167	3.261257017
ENSMUSG00000002111	1.909215156	1.610438326	1.3990298	1.365710275	1.536506137	1.075662979	1.39493229	1.806082432	1.249071489	0.552497702	1.913787957	0.788648167
ENSMUSG00000002129	11.49351552	11.70615749	11.51420019	12.75303142	12.91886216	13.29772681	15.64829105	13.51639589	13.67936057	14.19433436	14.11248272	14.50177589
ENSMUSG00000002147	1.791952589	1.907015769	1.38351979	2.039586307	1.912788119	1.927030735	1.656447166	1.442865436	1.97229924	1.585591618	1.36943701	1.073525823
ENSMUSG00000002190	2.29285762	2.999938156	1.969444014	2.234562994	2.52344734	2.079885241	4.703745509	3.254403977	4.669329657	3.930521271	3.8922314	3.800979571
ENSMUSG00000002204	0.046773609	0.082452048	0.186589748	0.07374073	0.102044275	0.109946059	0.053729927	0.090532782	0.143857218	0	0.080066385	0.110043683
ENSMUSG00000002205	2.816598472	2.93954227	3.277938602	2.607534798	2.88721096	2.774607057	2.87047251	2.751748351	3.127899627	2.175455625	2.766773754	2.586889573
ENSMUSG00000002210	5.110859529	5.631865387	5.710509917	5.695304929	6.245892113	5.734428707	5.645969829	5.831348506	6.111357547	4.959122545	5.587756531	6.350115835
ENSMUSG00000002221	4.589311568	4.899941989	4.674745344	5.308288268	4.427665057	4.221276092	4.048630834	4.299644989	4.25084674	3.865436811	4.160807694	4.064987524
ENSMUSG00000002222	15.67352699	16.86956107	14.91269989	17.10401947	16.61314786	15.94266863	13.83260568	11.96800877	14.147658	13.85298386	12.80165679	12.34035113
ENSMUSG00000002227	1.032024006	1.008607888	0.69513368	1.195577558	1.23681994	0.847831509	1.002636761	0.826347003	0.896593158	1.061129935	1.171700106	1.120273196
ENSMUSG00000002228	0.077844416	0	0.111161041	0	0	0	0.669765041	0.287401328	0.266457098	0.173749461	0.270248317	0.433662261
ENSMUSG00000002233	6.624992084	6.511028433	6.101414676	6.443786811	8.294735738	7.402526122	11.85059661	13.23073157	12.5733199	12.53289278	12.98927276	14.02383402
ENSMUSG00000002240	0	0	0	0	0	0	0	0	0	0	0	0
ENSMUSG00000002249	0.381250756	0.596628394	0.292160028	0.323145589	0.689373013	0.347218571	0.672585271	0.723028628	0.622779011	0.889461797	0.774759388	0.847168853
ENSMUSG00000002250	3.986439274	4.874316466	4.059773353	4.410766432	4.538629727	4.750267087	4.98482533	4.4418135	5.019375651	4.773319526	4.279922398	4.581052302
ENSMUSG00000002257	0.730056359	0.798681206	1.152291006	0.67803648	1.57519504	0.97754569	3.296477132	2.88954579	3.314397231	2.775525875	3.062179786	2.921537147
ENSMUSG00000002265	12.10837635	16.15573736	13.44157823	17.35183886	15.62298967	16.19967387	10.5656533	8.673687938	11.99420261	13.80610237	10.8188643	10.91461676
ENSMUSG00000002266	0.415969889	0.516318986	0.535505062	0.691426992	0.495388219	0.660017823	4.102855135	4.069105314	4.260546597	3.035301222	3.062689769	4.308076553
ENSMUSG00000002274	52.12670861	58.06967353	49.41419256	42.18969542	44.0806402	44.74363328	28.39067235	31.17531025	26.78677588	33.00603072	36.48264301	21.58460251
ENSMUSG00000002279	0.780655062	0.88944635	0.765877306	0.61661948	0.657155239	0.504906574	0.770603587	0.794222654	0.752914284	0.673730222	0.522343935	0.593720712
ENSMUSG00000002280	8.015722375	7.2910724	8.478226572	6.584441809	7.164385126	7.468080972	5.624660678	5.532635573	6.088795362	5.060219288	6.139020199	5.755710048
ENSMUSG00000002289	0.584805876	0.61212743	0.486484308	1.197733895	0.884220712	0.982101079	2.980523266	3.182730754	3.61905669	2.522336163	3.169058726	3.422361949
ENSMUSG00000002297	0.086854135	0.104733334	0.09501098	0.05695139	0.041056642	0.060030437	0.315496156	0.414857079	0.37882071	0.597934248	0.445008306	0.579567693
ENSMUSG00000002307	5.072828313	5.880977987	7.029899464	6.375778662	6.257802871	5.61566152	6.674374706	8.044750583	8.008481252	6.856617476	7.506950784	9.593895718
ENSMUSG00000002308	4.866390857	3.972055172	3.340109886	3.887767191	3.931220041	4.693769726	3.865355791	4.038465475	4.283984875	3.348764469	3.514658629	3.0263585
ENSMUSG00000002319	12.1503796	10.98238909	10.23477875	12.74151637	10.25450394	10.39620583	14.29908683	15.73907107	14.36296981	17.63174211	14.26275216	16.18089275
ENSMUSG00000002320	5.025358045	4.456325297	4.436911002	3.78872754	4.355965813	4.933889968	4.4575144	5.486328303	5.365553106	4.898791669	4.640800447	6.122410231
ENSMUSG00000002324	0.474619446	0.895957625	0.278283975	0.972925122	0.556558341	0.857454822	0.639981011	0.419288522	0.450776007	0.726091763	0.839601849	0.420543761
ENSMUSG00000002325	1.118830382	1.330769814	1.098625591	2.925562312	2.776147955	3.357432369	1.359748494	1.591922904	1.369065878	1.220364066	0.999336559	1.579345252
ENSMUSG00000002326	4.268001656	4.603753361	4.192161079	3.720937597	4.203126195	4.818971705	5.909935705	5.360045521	5.877732052	6.456995771	5.605324563	6.017604932
ENSMUSG00000002329	16.40500952	16.34715604	15.22553312	17.34985575	14.02287515	15.05841671	18.39287334	16.65861256	18.17836193	16.44359255	17.23490233	19.82654319
ENSMUSG00000002332	16.07774635	18.4727292	14.16534217	12.52643405	13.33282891	14.47482952	17.98132389	17.96677842	17.94863179	16.49686841	17.96883048	17.04467632
ENSMUSG00000002341	24.396524	26.061411	28.585928	27.702419	28.249628	27.91024	139.941345	133.255081	146.165405	158.004898	129.075089	140.258606
ENSMUSG00000002342	5.375564435	4.563976156	3.254710668	5.722526218	4.458263921	5.536876149	4.947052955	6.485361556	4.102951747	4.867329337	4.504440362	4.170947678
ENSMUSG00000002343	9.878536579	6.389301533	9.379060707	6.612465525	8.66556301	6.810551797	17.88311925	18.0655561	19.49502465	17.21926863	17.42384007	20.34073392
ENSMUSG00000002345	7.076134462	9.154485341	8.233896027	7.935328057	9.124309239	7.529144893	10.76908367	7.895134393	10.92016044	9.136185956	8.119799671	9.820364108
ENSMUSG00000002346	4.969970183	4.822269512	5.501684967	4.622294217	4.811386036	3.938918041	2.410263516	1.95545278	2.367581841	1.710802449	1.467874163	1.758758706
ENSMUSG00000002365	5.663854	7.207597	4.636591	6.627421	6.812218	5.462693	3.88784	3.750832	3.771824	5.292523	4.529198	3.896381
ENSMUSG00000002372	29.580099	25.134821	29.159239	27.880964	28.485006	28.295147	29.507534	31.398581	29.664232	30.721313	30.238688	31.733027
ENSMUSG00000002379	25.162718	23.419008	25.488615	20.522545	21.435089	24.346479	19.953766	22.852827	21.590219	19.999409	22.131029	21.902895
ENSMUSG00000002384	0.034330562	0.046000392	0.015990418	0.053831552	0.039333866	0	0.108958522	0.135311227	0.144716954	0.258590988	0.107387289	0.078211577
ENSMUSG00000002393	8.24576884	10.77039792	11.0745807	9.880214906	7.140577015	9.941466549	11.98726555	15.273657	12.84450374	13.63028869	12.83097318	12.74778828
ENSMUSG00000002395	12.69787303	12.70602815	13.35745439	11.8666088	10.54618277	11.48194622	9.955777153	12.18859021	11.63442993	9.436683433	12.07013623	10.7286082
ENSMUSG00000002396	2.948429644	2.934373981	3.168622665	2.678919403	3.0781353	3.193951734	4.295288721	4.310819681	3.779091827	3.447389056	3.040572125	3.587649573
ENSMUSG00000002409	7.779792984	9.010450697	7.551373275	8.216249838	7.562113983	6.913689594	5.5273011	5.393336413	5.045478737	5.349140888	4.057895533	5.711322236
ENSMUSG00000002413	7.568808282	8.507314494	8.166812776	8.160863985	8.643432665	8.416455018	3.79192024	3.039302735	5.099645054	5.24831448	4.002279346	4.050684625
ENSMUSG00000002416	5.937991443	5.925613848	5.445796678	4.794137537	5.016647591	5.491628176	6.033313321	5.154321571	5.339514079	5.235036732	5.327426215	5.434449944
ENSMUSG00000002428	1.946958929	2.256734783	1.725652471	2.798910161	1.755478093	2.0479816	0.862136643	0.783989047	1.466859943	1.071533611	0.910870856	1.073357629
ENSMUSG00000002455	14.88114248	13.94100529	13.57750615	14.16240291	15.8447159	15.92163045	14.14230213	14.088037	15.17065867	15.1669331	12.0836135	13.11199267
ENSMUSG00000002458	8.758984218	6.114090888	8.206502446	7.749566592	7.135652087	8.075133636	10.60149824	13.91176697	11.84458702	10.06011902	8.489313032	7.819603362
ENSMUSG00000002459	3.179972025	2.317801767	3.274974553	2.995121621	3.102373684	2.845924643	4.808263921	5.823284296	5.377331742	4.784621464	5.134330948	4.743864653
ENSMUSG00000002475	21.06225095	21.79335867	18.93904971	22.62077641	22.15066858	21.32238455	8.245535798	6.441172171	9.159425718	9.172467986	8.024936191	5.949266614
ENSMUSG00000002477	34.394176	34.544113	31.008863	29.385845	30.67804	29.480217	35.177925	41.702076	40.894753	40.450798	37.506935	42.816143
ENSMUSG00000002486	0.884645958	0.685502311	0.963936307	1.046842014	0.688679663	0.943250595	1.099995894	1.330505259	1.404980722	1.837921481	1.462254089	1.763150592
ENSMUSG00000002489	6.631420055	7.744274363	8.447058552	11.9500366	9.006516201	7.762938084	5.759979766	5.846813647	5.406402837	5.039184489	5.24319765	5.147156829
ENSMUSG00000002496	9.736276633	9.726316472	9.630649917	9.2277094	10.15227683	8.395152972	9.432961331	8.950263733	9.714564851	10.37375473	9.402048036	9.432256192
ENSMUSG00000002500	0.128991403	0.046195146	0.04889577	0	0	0	0	0	0.169735088	0	0.069593579	0
ENSMUSG00000002504	20.26249268	17.18817619	16.72159921	18.4568591	20.86802783	21.73243493	17.26253707	17.78878265	18.39157414	17.85269269	20.18708939	20.08784894
ENSMUSG00000002524	28.92895692	24.78361951	27.09951869	25.47930519	25.87877726	25.95885709	28.48965272	29.87347833	28.49295741	26.93472812	27.5407901	28.77034175
ENSMUSG00000002546	17.20096966	18.27770569	19.57355607	18.07982904	18.79974378	17.93010959	16.1849185	15.16847666	17.16130451	16.23492308	15.63259467	16.3523029
ENSMUSG00000002550	11.89204845	12.67035768	14.51811366	13.94179503	11.84411418	11.7017236	20.11334829	20.10791602	20.94703735	24.20647917	21.19305865	23.38724737
ENSMUSG00000002565	0.139433201	0.03860544	0.054005872	0.184898979	0.327749271	0.030490278	0	0.023647915	0.023246952	0	0.025588825	0
ENSMUSG00000002578	1.615078622	1.541916741	1.563374204	1.762977498	1.382750498	1.541536034	2.391818289	2.33056772	2.371351673	2.7798702	2.493308176	2.597407708
ENSMUSG00000002580	47.759651	49.368851	50.065899	40.108231	44.33091	49.163815	67.072243	71.514297	61.77536	59.166416	59.719288	61.977459
ENSMUSG00000002588	0.194093521	0.340000902	0	0.22354087	0.026069878	0.094130955	0	0	0	0	0.02648011	0
ENSMUSG00000002602	8.464484505	9.647638699	9.111326113	9.429003678	9.156212084	9.074898041	8.57137534	6.899349319	8.508771657	7.830437929	7.624840068	7.650091841
ENSMUSG00000002603	1.309383207	1.130562899	1.29680848	1.446944783	1.281393933	1.454341549	1.559323233	1.484766197	1.875065724	1.655398004	1.63143617	1.401651304
ENSMUSG00000002608	11.73164691	10.14766145	11.01605276	10.29849492	9.228379061	10.67850522	8.86343112	9.011670439	8.371075964	7.906750935	9.757564314	8.701862151
ENSMUSG00000002617	1.519410485	2.300492145	2.024165077	1.514610143	2.099193961	1.728563699	1.252840907	0.90184818	1.652642295	1.506100036	0.96027188	1.782426005
ENSMUSG00000002625	16.390415	16.781715	15.444997	17.031559	16.850658	17.015715	12.013735	11.228114	11.626551	16.614016	15.827313	16.717289
ENSMUSG00000002633	0.470824	0.477336	0.518073	0.505077	0.359872	0.47973	0.246945	0.483962	0.31786	0.389707	0.256068	0.543698
ENSMUSG00000002635	6.061432615	5.937549178	5.858513191	3.508880584	4.700222924	5.016726303	7.290048832	6.116814299	7.396401737	6.286446623	7.646575971	7.713747711
ENSMUSG00000002658	37.891853	35.096546	38.653049	37.672523	38.208076	33.823105	22.360262	24.673367	24.918224	28.125036	23.859774	27.528341
ENSMUSG00000002660	39.83165	33.335938	38.627552	37.583416	36.521759	36.378086	30.652704	29.455381	28.346087	26.621962	32.115391	32.304768
ENSMUSG00000002661	10.65011806	8.322011308	7.62181859	8.139622403	6.572051169	10.41416026	11.48624177	11.89862389	8.078287176	9.196762061	10.65775937	8.528749927
ENSMUSG00000002664	0.558078	0.914475	0.466782	0.462492	0	0.130953	0.214153	0.356976	0.300341	0.592719	0.246936	0.390067
ENSMUSG00000002668	0.315173	0.377317	0.222487	0.175555	0.135157	0.405251	0.075646	0.069369	0.060371	0.146186	0.115088	0.185263
ENSMUSG00000002679	8.338453572	8.274579501	6.792513477	5.049667163	5.290039075	6.001567288	4.375247169	5.205077339	6.622660594	4.86382352	4.096806742	4.079079684
ENSMUSG00000002688	3.248264	2.802099	3.312554	2.786244	2.49852	3.082839	3.881153	3.181428	4.117051	4.704175	4.692809	3.941071
ENSMUSG00000002699	0.571621071	0.603449212	0.630666512	0.638799141	0.407777517	0.651552165	1.55741629	1.516501281	1.864951917	1.098356909	1.522762809	1.242167868
ENSMUSG00000002718	10.59571531	11.32355094	10.19423675	9.681907745	10.37318294	11.79375558	16.65230385	16.27960706	17.79541683	15.81489708	16.01373167	15.77749796
ENSMUSG00000002728	7.465606954	7.455670149	7.016643031	7.40637963	7.059525156	7.85858634	6.237972898	8.10415299	6.93539008	6.39628542	6.420876598	7.571009317
ENSMUSG00000002731	7.774184767	7.42573109	5.773971476	6.876175768	6.597275161	6.412521019	16.33101046	19.37198454	16.2601769	16.87622856	17.65160623	17.16427907
ENSMUSG00000002732	1.464538292	1.611729774	1.392886053	1.399052903	1.274003559	1.528855049	1.024231589	1.300754506	1.562449106	0.915534271	0.919420523	1.656453889
ENSMUSG00000002733	11.76145802	11.37393818	12.14641645	13.31693913	13.46434261	13.17391074	7.184929853	5.820203478	7.189056983	6.370011254	6.654394475	6.732902424
ENSMUSG00000002741	26.94683406	25.50833597	26.93765467	26.3789062	25.38077219	27.55740997	59.26443727	61.04624769	56.74192203	57.1985108	53.9120405	63.54261567
ENSMUSG00000002748	7.020247679	7.668539836	7.844158564	8.398736166	7.646230194	8.027983419	5.736925569	4.805112252	6.195379094	4.589905974	3.968464925	5.039536812
ENSMUSG00000002763	14.58727654	12.97489573	13.7472108	12.2226165	11.82273631	13.28110853	8.802081836	8.82894029	8.822788799	9.16550154	10.58165118	8.578067307
ENSMUSG00000002767	17.8754143	16.28263895	13.94716394	14.45111702	18.18691378	17.16550517	15.55430512	16.04791568	10.86142091	11.1842183	15.76344951	12.91453688
ENSMUSG00000002768	48.852627	44.361809	49.142666	44.41695	47.642998	43.787811	67.805397	74.040176	68.248314	66.296928	63.631626	67.823776
ENSMUSG00000002769	0.725988806	1.073939552	0.169006455	0.526528881	0.359790187	0.312957537	0.016217351	0.055338209	0.068600933	0.394504366	0.328850224	0.090756978
ENSMUSG00000002771	2.679240424	2.780501929	3.038878402	2.779127714	2.686755795	2.649014823	9.391559456	9.910204499	8.98398293	8.347200411	10.07363653	9.427475079
ENSMUSG00000002778	23.4602245	21.70551067	17.91460919	16.08166927	16.02720157	22.74852993	23.51636925	29.85952764	26.38165099	24.00314502	24.15375118	23.5551683
ENSMUSG00000002781	2.291315692	1.839578803	2.11755196	2.315381613	2.117828174	2.178198639	2.532692429	2.282345306	2.112619972	2.295073525	2.183058604	1.923835977
ENSMUSG00000002791	0	0.016485334	0	0	0	0	0	0	0	0	0	0
ENSMUSG00000002797	1.526355351	1.502877583	1.797167576	2.167793152	1.486430123	2.090085581	1.550453736	1.377606333	1.711073639	1.625397164	1.175983934	1.323766392
ENSMUSG00000002799	4.296171194	4.937699885	4.464895712	5.12091526	4.954728498	4.726614878	6.233790159	5.512036339	5.394430962	7.204524449	6.255800335	7.087117686
ENSMUSG00000002803	16.80344193	8.995570512	16.39871404	8.659127346	4.830190623	14.8582713	13.13167118	7.109032518	3.801032318	14.11863993	6.328128975	14.62377562
ENSMUSG00000002804	3.673954181	3.314947427	2.626641367	3.192175828	3.272212795	3.016498098	3.480517056	3.674946381	3.272185442	2.756865298	2.604419121	3.277604978
ENSMUSG00000002808	43.65167524	39.7470072	46.18495194	45.8114421	41.38169247	45.65771472	13.73828423	12.24761786	12.62793461	11.81731349	13.08353039	11.41411898
ENSMUSG00000002812	8.634668705	9.746896582	8.576114593	9.519204772	8.50841563	8.455753099	12.13380657	11.63555191	11.64003218	9.858995446	9.495980313	10.66938674
ENSMUSG00000002814	0.92324718	1.042656352	0.970510359	1.227351309	1.015508616	0.865752185	1.13622487	1.024827861	1.167797835	1.922897844	1.772621153	1.415210646
ENSMUSG00000002820	3.756824124	3.30571083	3.342590656	3.117202873	3.846851431	3.281143686	2.732194722	2.774425235	2.937176379	2.41955088	2.847104818	3.243915223
ENSMUSG00000002825	3.644893868	2.296713742	3.272079774	2.946593486	2.684290762	2.561519554	3.251410862	3.489310156	3.395348144	3.12952964	2.755697359	3.769642339
ENSMUSG00000002831	0.185618795	0.301605035	0.166954887	0.585928319	0.836675588	0.76846436	0.013542592	0.024552424	0.02413694	0.045472101	0.03985061	0.059693217
ENSMUSG00000002833	12.07853035	9.759710209	11.85563075	9.928348735	11.83526842	10.40990555	9.24743873	10.23344507	8.828347849	10.28449511	10.83619265	10.22396217
ENSMUSG00000002835	2.008059	1.849758	1.815538	1.775268	2.253232	1.686103	3.941512	3.947886	3.843729	5.243086	4.903083	4.894236
ENSMUSG00000002844	53.81509	46.723724	51.476948	46.717461	47.24683	49.320019	60.960064	60.231918	60.809364	54.884285	51.469082	60.100933
ENSMUSG00000002845	1.219499723	1.40356527	1.198453654	0.934539059	1.482311061	0.859206225	1.009306777	1.363738447	0.791580806	1.480498697	1.334661093	1.293365403
ENSMUSG00000002846	8.894688974	9.228426847	8.172356617	8.159294721	8.404558398	7.817383244	10.70422709	8.799126579	10.17296926	8.401068525	8.177010369	8.250194547
ENSMUSG00000002847	0.562485	0.508046	0.700586	0.769621	0.862387	0.786937	0.197962	0.506376	0	0.324724	0.116743	0.254107
ENSMUSG00000002870	1.012284394	0.878070469	0.991212316	0.676952108	0.80170522	0.859297022	2.488682486	2.369740468	2.58087271	3.663145153	2.67769233	3.144438635
ENSMUSG00000002871	2.47323291	1.987598196	1.850707236	2.268510381	1.628248159	1.86361311	1.754717918	1.239729277	1.408772339	1.240660972	1.524634039	0.998635561
ENSMUSG00000002881	5.555883066	6.705038792	5.067816829	5.873030116	6.026171518	6.249985082	6.977317987	6.188861102	7.277441265	7.307403108	6.806754025	7.305655869
ENSMUSG00000002885	1.967148077	2.154494798	2.315115258	2.149314884	2.243567352	2.168283736	3.208418516	3.037317504	3.028782583	3.400468426	4.307611191	3.704124401
ENSMUSG00000002897	0.624933253	0.498061723	0.59260098	0.94710284	0.828722042	0.951934335	0.650602924	0.276702357	0.577742113	0.761594278	0.602373961	0.74745394
ENSMUSG00000002900	3.360788902	3.879149694	3.257298158	4.353012497	3.64355453	3.522814838	6.813291442	5.1646274	7.01536569	7.125838886	5.834023797	6.652488199
ENSMUSG00000002908	3.74052206	3.220139689	2.659145842	4.245697827	4.099129957	3.695763462	5.290398254	7.338421447	3.354071033	6.818608683	4.608866395	6.107813829
ENSMUSG00000002910	1.748214866	2.057972672	1.927556609	2.688062101	4.378078261	3.966478459	2.148811402	2.095744624	1.924883692	2.458747154	2.077503963	1.853644004
ENSMUSG00000002930	0.080504	0.03573	0.046091	0.04936	0	0.052043	0.52452	0.363144	0.319636	0.173611	0.238619	0.318711
ENSMUSG00000002944	0.244673897	0.256373752	0.34957286	0.366371227	0.357296442	0.223929023	0.314923504	0.354861384	0.770741242	0.317175053	0.353807235	0.434866545
ENSMUSG00000002948	8.656864244	8.390526429	18.28136156	19.19480743	8.760095278	20.44237694	5.604808958	5.262094463	6.459170114	6.266703067	5.62928425	6.503412932
ENSMUSG00000002949	5.702987625	5.63962625	6.386207631	5.733972068	5.628628956	6.660869087	5.085527116	5.742841586	5.68177262	5.018725688	5.150295046	5.436214752
ENSMUSG00000002957	55.71934847	47.21633554	56.24081156	54.94953495	48.67333174	49.46417384	57.26651854	54.18740234	61.63302667	61.97502821	57.83412939	54.86411637
ENSMUSG00000002963	3.973951334	4.370700927	4.374016527	4.201763776	4.424570341	3.596030233	4.460424077	3.621231399	4.312727858	3.255752078	3.068984778	3.094057773
ENSMUSG00000002968	8.8623356	7.931491463	8.857010012	9.069850941	7.394973669	8.021697374	11.09254212	11.56875968	11.05295399	11.70076565	12.15576338	11.14935885
ENSMUSG00000002980	6.054345055	8.580308267	5.766971468	6.677738048	6.932517349	5.86444886	3.134729165	2.719315307	3.788395835	4.261317588	4.571183102	2.83601954
ENSMUSG00000002981	20.2470212	20.41076716	18.63112477	20.66619823	19.2801637	19.44760544	19.24158016	18.2313422	18.80214676	20.65123932	20.30557506	19.55107066
ENSMUSG00000002983	1.953358765	1.358976523	1.909879174	1.51783359	2.055650642	2.055473156	1.921682016	1.696940591	1.889518653	1.716680103	1.752427225	1.95616862
ENSMUSG00000002984	12.55832137	12.09680106	13.90518032	13.0313558	11.89107416	12.54149889	14.03981025	14.31602711	13.28298366	14.14297649	15.79363324	14.14887537
ENSMUSG00000002985	211.3873716	410.4034875	312.5328707	352.1006254	241.6935522	221.8927307	327.6078479	247.1781503	179.2835807	286.8397326	227.1592267	258.0267706
ENSMUSG00000002992	0	0	0	0	0	0	0	0	0	0	0	0
ENSMUSG00000002996	5.279841017	6.065577391	5.251819892	4.7974253	5.773537243	6.101062568	6.340660006	5.533872737	7.244934077	5.484307089	5.611961607	5.652493862
ENSMUSG00000002997	8.333644396	4.821293387	9.168849347	9.9879163	7.378884886	4.248260761	14.18794358	14.54242485	27.24459579	13.80952393	13.69795801	14.28980313
ENSMUSG00000003031	6.766629672	7.717828278	6.034907109	8.889526686	6.868736722	9.02182427	12.46405639	7.979970045	8.510725276	12.02630537	10.80430346	10.02710744
ENSMUSG00000003032	1.327091207	1.897948286	1.189810178	3.727101306	3.966157198	3.217206511	1.386841096	1.49743623	1.773796939	1.167685403	1.161621229	1.351196148
ENSMUSG00000003033	19.00270396	19.35622864	20.24829644	15.94722989	16.60532888	16.49815542	30.8409384	35.23738406	29.56707625	30.35795216	31.85434485	30.05248717
ENSMUSG00000003037	8.514212196	8.500145209	8.187794652	8.360800752	8.50024115	9.018923022	11.43769096	10.68451471	10.44519182	10.64830607	9.844879802	10.17356798
ENSMUSG00000003038	11.01528541	7.523910026	6.102586058	11.19407322	6.390314757	5.157831348	28.50232203	29.95743182	26.75297065	17.07951288	27.84520531	20.61218993
ENSMUSG00000003039	18.78766364	18.76512686	20.67976321	18.02973992	17.68540313	18.34614051	23.6521702	21.62591866	23.40443464	21.03315844	18.84845284	24.33042416
ENSMUSG00000003051	0	0.069398647	0	0.078761416	0	0	0	0	0	0	0.034614183	0.032796152
ENSMUSG00000003053	0	0	0	0	0	0	0	0	0	0	0	0
ENSMUSG00000003062	4.954458636	5.052729836	5.267092225	3.506099391	4.38439824	4.113155947	7.345850588	6.421580213	6.01160936	6.634033273	7.0357765	6.644782869
ENSMUSG00000003068	12.84387095	9.883344897	10.05068486	8.851095452	9.686741952	9.057780561	12.66304686	12.47235804	12.08770997	11.77723363	13.25648561	14.77079792
ENSMUSG00000003070	3.531505	4.045562	4.843728	4.355947	4.728694	4.694378	11.174317	12.38501	10.261934	9.474294	9.740377	11.093668
ENSMUSG00000003072	67.34532732	54.86281117	58.12190565	58.98760188	57.66496851	63.48428988	62.12079876	63.11903065	58.61161803	59.47662669	65.59140493	56.54158412
ENSMUSG00000003099	34.005652	30.82455531	34.43786979	32.51518476	33.44037634	35.42532673	29.20776289	30.55748257	30.58805186	31.43606462	32.65253844	30.8538042
ENSMUSG00000003119	1.488377908	1.820480344	1.581447156	2.053012109	2.015300161	2.183521517	2.072693792	1.469386135	2.421588242	2.302020282	2.115689367	2.506444094
ENSMUSG00000003123	1.482120781	1.479396259	1.231323394	1.541417188	1.642610477	1.591317526	1.481582952	1.465205855	1.612268974	1.67974595	1.578088842	1.664849193
ENSMUSG00000003131	21.51173425	22.69336993	23.31195484	21.21362446	23.72250692	22.48714759	28.34082665	26.95123301	28.64558303	29.18104311	26.44575764	28.62830148
ENSMUSG00000003134	2.121216129	2.279520665	2.00501148	2.546709084	2.320472559	2.713843719	3.080711077	2.763353064	2.836086741	3.741082842	3.255365654	3.144724062
ENSMUSG00000003135	6.627592203	7.05948399	7.452449814	7.646035109	7.555668723	7.903476614	8.650943064	8.611689146	8.278638345	8.976239689	7.697351582	9.922707071
ENSMUSG00000003153	17.00777417	15.71653492	17.8940635	21.10379509	19.09532619	19.46707864	17.81961888	16.4182263	17.99507667	16.00660267	17.44124002	16.17731315
ENSMUSG00000003154	5.326280874	5.999675793	5.629061205	6.64908735	6.247270039	5.974965285	6.799807012	6.810186239	7.104949178	6.58137779	6.042566141	6.864426423
ENSMUSG00000003161	5.983426892	6.249477835	5.634367426	4.958520854	4.689483824	4.895119543	5.646289841	5.339064016	5.537310299	5.13069417	4.819077547	5.423824798
ENSMUSG00000003166	13.30106855	19.5627493	14.51043723	19.86368025	14.91265659	19.7261836	17.64668765	15.0561419	21.52492722	21.40868157	16.42521108	29.22686137
ENSMUSG00000003184	2.489728408	3.4105413	2.659543815	1.99565432	3.090030262	1.88323255	2.479317958	2.623802786	2.575502473	1.377273105	2.547400617	2.219548259
ENSMUSG00000003190	0.575875398	0.8110719	0.491902765	0.532317454	0.722468052	0.674034869	1.393413438	1.40665124	1.340650629	1.506673021	0.957238677	1.500199912
ENSMUSG00000003198	0.36447177	1.382171362	0.513261942	0.259397224	0.486359379	1.134178528	0.903605926	1.375602371	1.493508148	0.254442661	0.752245762	0.412809818
ENSMUSG00000003199	28.90182	27.1558271	29.17295002	26.00477396	26.60358788	27.37039677	29.91684691	29.9985523	29.91752574	31.12060606	28.56570875	30.05229219
ENSMUSG00000003200	20.094091	18.052021	18.567333	19.785675	22.572426	21.241085	25.290899	25.585909	24.980209	25.782263	25.549656	25.550304
ENSMUSG00000003206	0.517252	0.461133	0.615787	0.442507	0.229706	0.155524	2.021123	1.46815	1.37312	1.353183	1.830769	2.056543
ENSMUSG00000003208	6.114762	6.825696	6.27404	5.840473	5.294026	4.862792	7.426637	5.994993	6.799356	6.717333	6.745904	7.223953
ENSMUSG00000003226	7.219354439	10.07923895	7.808230067	9.585993478	9.580615859	9.267561637	4.182753105	3.061071098	6.075640172	5.394718042	3.844468356	5.496315762
ENSMUSG00000003227	0.058142	0.147955	0	0	0.024385	0.075256	0.150572	0.05576	0.139808	0.312268	0.136726	0.053414
ENSMUSG00000003228	1.788298	2.836959	2.611258	2.444699	3.189688	2.544255	3.415421	3.55805	3.90384	3.339514	3.319032	3.115365
ENSMUSG00000003233	6.422079355	6.987333887	7.932742308	7.779727761	8.603319542	7.853067497	14.40261925	11.9952331	13.58547397	13.27160521	10.97082973	12.34344402
ENSMUSG00000003234	16.65122782	16.05634529	16.97991659	14.79179335	14.20064909	15.8872664	15.35813724	14.26513271	15.55683626	14.4566687	13.33379675	13.21122927
ENSMUSG00000003235	15.87875494	15.0424364	15.38118097	14.47196666	15.95989221	14.55154816	22.26909852	21.74428762	22.66259682	22.60048666	20.32750703	21.88825412
ENSMUSG00000003269	16.75072546	15.17232009	16.020361	17.29731848	17.16186459	17.09097742	24.23125506	21.82826889	20.66027575	21.32033584	19.59950359	21.67181143
ENSMUSG00000003271	2.10926361	1.448626538	1.99982322	3.038748206	1.77214392	2.254872232	3.104580433	2.759851753	2.791881739	2.768550529	3.258076723	2.81934092
ENSMUSG00000003273	34.28339109	35.05349867	37.71166429	39.28076969	35.52271206	35.5346689	23.43049804	23.521917	21.83833986	19.85434921	25.03644009	22.26455453
ENSMUSG00000003279	17.81915905	20.82459907	22.37022604	22.49096745	22.41894481	21.79238917	7.916851968	6.362307526	9.005470802	8.437416394	7.578637917	7.020688427
ENSMUSG00000003282	0.149378331	0.189016456	0.094249796	0.153999526	0.117087597	0.177824565	0.055246098	0.041865173	0.053396012	0.074613789	0.10805204	0.140188085
ENSMUSG00000003283	0.950524	0.807266656	0.918985	0.703773011	0.869422	1.463081	1.011749	0.996960231	1.28395867	1.223233648	1.102549	1.144087
ENSMUSG00000003299	12.67338338	10.87328992	12.47616905	12.26336808	11.06270357	10.59316197	10.13007686	10.89102754	9.829841005	9.791123381	10.19188205	10.481964
ENSMUSG00000003308	15.06412753	12.82112535	12.24129526	15.91235935	12.83560349	14.12320976	14.66621149	14.6564989	10.80598469	15.63001184	15.56598633	12.88929829
ENSMUSG00000003309	0.022523615	0.06178071	0.135790134	0.027805088	0.028530031	0.094933011	0.377374256	0.373444765	0.429171496	0	0.125128679	0.170996728
ENSMUSG00000003316	28.04775917	33.41751634	33.6722371	34.69336973	34.29037002	33.6164637	31.07989969	25.62539657	31.9797396	30.54743928	25.67684023	26.89924043
ENSMUSG00000003341	0.053995279	0.056906656	0.024247745	0.043911811	0.055947118	0	0.074696948	0.045294152	0.043867244	0.159232665	0.09371264	0.056078177
ENSMUSG00000003344	20.13795508	17.19346038	19.67012841	20.24399635	18.78205624	18.88074366	19.46827509	20.38437134	19.14319438	18.28926698	19.0437619	17.86200155
ENSMUSG00000003345	25.98432006	25.80610582	28.60470603	27.25184136	26.90042914	25.51865934	21.53115262	21.4733906	20.74103474	23.42085652	20.83267353	20.21998318
ENSMUSG00000003346	88.01320333	77.1696721	87.61375875	84.73736863	82.20766895	47.83607235	87.12892149	87.74498994	84.57059146	49.23196627	85.42125566	78.39270387
ENSMUSG00000003348	3.125465367	3.402971639	2.949558327	3.603673535	3.242734339	3.324906632	11.56088215	12.3196788	10.9994694	10.85830951	11.3135273	10.05892623
ENSMUSG00000003352	48.6869182	40.64060332	53.85547653	51.03964324	44.07452356	44.78968124	44.51706254	47.7889925	42.92301284	41.03683553	41.20692597	40.0382928
ENSMUSG00000003354	2.240271687	2.77420507	2.722035191	2.75114754	2.214146687	2.410982681	3.622320432	3.558755321	2.960709188	4.289642018	3.197312751	3.243856074
ENSMUSG00000003355	0.125400891	0.254242059	0.140950939	0.096996006	0.180410978	0	0.187268363	0.298533673	0.437471554	0.401980912	0.410387188	0.138134656
ENSMUSG00000003360	10.15563773	9.636116265	10.29904913	10.82420987	10.35840164	10.18891558	10.13946282	10.01536362	10.03461102	10.61696757	9.809284306	10.77233439
ENSMUSG00000003363	106.8305484	99.35410291	116.6925884	117.3169769	116.3614434	111.6794676	68.04618721	65.22260488	70.46564561	68.19826238	69.6428926	68.09738145
ENSMUSG00000003378	38.09394376	35.55364082	44.20591659	38.24214118	36.20455449	35.87934999	36.00544571	37.99555986	36.41348721	35.89655872	36.82452151	35.26042961
ENSMUSG00000003379	0.048378	0.079375	0.236036	0	0	0.094138	0.053515	0.096374	0.400671	0	0.079004	0
ENSMUSG00000003380	69.18253104	70.85188282	66.16847781	65.48021438	69.13425068	69.49935543	62.55200132	65.36683847	65.46289806	60.40358211	71.59831567	62.98101367
ENSMUSG00000003382	1.853230439	2.078079741	2.233022536	2.338797419	2.413705403	2.976907366	1.39323865	1.127185781	1.25058474	1.591852901	1.488378852	1.361406987
ENSMUSG00000003402	14.86568874	14.81704202	14.8535117	15.7007945	17.43438655	16.83232446	14.88277793	14.36053032	13.05770047	13.10500595	13.68570153	13.16641122
ENSMUSG00000003410	29.66929623	33.35239587	31.75014659	32.10823817	33.57128378	32.92918408	47.72998312	46.30271844	50.07958491	46.19205418	44.31212964	50.52413493
ENSMUSG00000003411	13.30189379	14.79220502	13.48560582	16.26718143	11.96374888	13.45295561	29.41678015	28.41611515	22.30020548	20.02448767	27.42414571	28.22964622
ENSMUSG00000003418	0.406152517	0.750670205	0.572179988	0.432625663	0.640254929	0.560794736	0.142637706	0.147501338	0.311629279	0.192391278	0.276729019	0.203414715
ENSMUSG00000003420	7.444116706	8.630193817	6.939943737	6.504765418	6.322141713	6.225186478	6.688443355	5.424716018	7.009746103	5.843399781	5.516029571	4.821037498
ENSMUSG00000003421	14.96509322	12.90997847	14.3350439	13.99556425	13.94716028	13.19734582	12.28554246	12.85344398	13.68105103	12.27278329	12.63085518	12.54261887
ENSMUSG00000003423	8.909776422	8.955412585	8.246508278	7.724617557	7.377431408	8.006699594	13.71649246	17.35571101	14.4467599	15.63705391	16.4466349	17.88206523
ENSMUSG00000003429	127.3968053	120.1289	121.6752956	113.0571501	111.1689452	116.5927132	171.1288963	182.936091	174.9158677	180.7898104	182.4214552	177.2442346
ENSMUSG00000003435	20.41476004	20.93312624	22.09315856	21.50102996	20.81904726	19.75365994	21.12549329	20.33275734	20.95883165	20.18384542	19.23536337	19.99657899
ENSMUSG00000003436	0.711233538	0.638697216	0.807356824	0.811878022	0.498848285	0.545211627	2.139631685	2.251065406	2.041166614	2.138311812	2.084172186	2.324664313
ENSMUSG00000003437	12.04950627	12.80552962	11.15741977	11.16442218	12.27572147	12.64570954	13.39152339	13.72034143	12.97170364	12.79631732	13.20078379	13.64329033
ENSMUSG00000003438	7.998139826	9.133282202	9.086485273	8.53767873	7.343036731	7.544030486	13.29936898	13.23152626	11.03881101	10.72380467	10.82386589	11.26131387
ENSMUSG00000003444	12.909388	10.722501	12.092322	13.126328	10.942547	9.671633	12.280444	15.168451	12.808963	13.221665	12.693959	14.673622
ENSMUSG00000003452	0.90091866	1.357823219	1.072383057	1.290689318	1.001005142	1.088742041	0.759140335	0.577290402	0.936923583	0.917991678	0.723895057	1.004956849
ENSMUSG00000003458	15.6470188	13.81588908	13.93376747	14.32027388	14.14983906	14.50871531	18.31575066	17.99804681	17.83396924	20.1061514	18.79307759	17.87835415
ENSMUSG00000003464	21.7402145	21.12967129	22.26155449	20.52950411	21.47045152	20.71791182	28.4536565	28.08794528	26.36770946	28.25578015	28.23525936	27.89409854
ENSMUSG00000003469	170.3385643	142.2379186	192.8549061	195.947689	181.6755314	183.0525336	54.11336646	48.32761634	55.20051396	51.84517237	51.54313661	48.59938383
ENSMUSG00000003476	0.468911284	1.382581549	0.164005642	0.663273309	0.551801068	0.594326835	0.145292953	0.237825286	0.303970422	0.328905309	0.264455442	0.285136465
ENSMUSG00000003477	1.143797568	2.706312578	1.162937788	1.551343675	1.444375618	1.365488288	0	0	0	0.057947312	0	0
ENSMUSG00000003484	0	0	0.026731034	0	0.080325225	0	0	0	0	0	0	0
ENSMUSG00000003500	11.34986624	10.89455202	10.23243625	12.30805643	11.01171677	9.490095332	23.68735448	18.61043077	22.83101107	17.90203283	19.58584253	22.95759056
ENSMUSG00000003505	0	0	0	0	0	0	0	0	0	0	0	0
ENSMUSG00000003518	18.80443215	17.4647145	18.846038	19.08908686	19.38145781	20.75258171	12.87830603	11.06395082	12.25134094	11.2333127	10.49223757	10.14341562
ENSMUSG00000003526	5.250144623	6.58278614	5.675518784	5.526798964	6.673940842	6.360566384	1.076686186	1.020721938	1.110383962	1.004324895	1.426752949	0.81945566
ENSMUSG00000003527	7.290233	8.000374	7.400476	8.330698	8.253028	7.096327	9.199074	9.766091	8.758977	8.093719	9.257505	10.182926
ENSMUSG00000003528	16.37315692	15.73418686	15.51562678	15.44902451	12.45217471	13.59012854	33.61763808	36.86386057	43.03342824	41.55099553	32.06351554	43.95120009
ENSMUSG00000003531	13.32148147	12.27125124	12.20590973	13.42239206	9.976999431	10.60288206	13.8666633	13.60505883	13.36956777	14.19011662	11.90068452	12.36503146
ENSMUSG00000003534	23.03743165	23.16186005	18.0824104	15.91224984	18.86571305	18.49619817	15.87149358	17.03787204	15.02609656	18.1405665	14.82054464	14.63516645
ENSMUSG00000003541	2.389117	1.510722	1.531334	4.033175	2.971389	2.462625	1.083683	1.094097	0.830953	1.475578	1.96112	1.784158
ENSMUSG00000003545	0.94946828	0.489517497	0.864778032	4.488565884	3.224739977	4.185382444	0.043308073	0.028457197	0.128984473	0.259360699	0.312638082	0.23398361
ENSMUSG00000003546	7.045905	6.999333	6.946317	7.983376	7.08297	6.7307	7.071378	5.71609	6.264219	5.590813	5.219149	6.172069
ENSMUSG00000003549	4.225966962	4.141204675	4.396124626	3.366821326	3.751363665	4.310378791	3.810919476	4.930699114	4.404753719	4.292841971	3.459546996	5.082621238
ENSMUSG00000003555	0	0	0.037387659	0	0	0	0	0	0	0	0	0.03592376
ENSMUSG00000003559	3.959237	5.056796	3.772461	3.289941	5.036932	3.696809	2.589066	2.004133	2.493307	1.904877	2.563898	1.774544
ENSMUSG00000003573	16.26263129	18.89858914	25.78077548	15.61268539	13.77519442	20.44802449	9.281961885	9.898242298	7.451032947	10.29526558	8.51728163	6.759568528
ENSMUSG00000003575	18.31856822	17.74324793	22.03339548	22.33595628	22.74671872	20.33042135	15.31463362	15.01036919	15.67583224	15.78336045	14.06572071	14.4592556
ENSMUSG00000003581	7.598558423	8.27600673	7.902334687	7.644327338	7.885789536	7.012889065	10.52505733	8.869006296	10.01069309	11.00963339	10.75939038	11.31963691
ENSMUSG00000003585	18.20335248	15.43739918	18.73541778	17.58710979	17.0095693	17.92670079	5.945344314	4.813330828	4.855452724	4.843709107	4.081477144	3.755234842
ENSMUSG00000003604	1.675470424	1.526216142	1.660072443	1.647540457	1.354018744	1.619180638	1.483777249	1.452408465	1.351295717	1.254344201	1.20474742	1.512901144
ENSMUSG00000003617	1.122548791	1.695882504	0.708317657	1.780700524	1.716018296	1.294931233	0.547958085	0.5876078	0.621911167	0.836608761	0.777824761	0.812091855
ENSMUSG00000003623	4.468222846	4.643428266	3.750513647	3.736330982	4.273409357	5.048637504	3.315769261	3.279199882	4.230782143	4.367929758	3.47222483	3.68764126
ENSMUSG00000003644	3.729075855	2.791075449	2.287771096	2.427406244	3.078549104	2.529364971	4.010323557	4.464750266	3.576191776	3.840601079	4.408885838	4.340709486
ENSMUSG00000003657	22.91052592	33.35038683	15.6641365	26.73922864	20.54567184	21.59064627	50.22498233	49.48828102	52.10862949	48.9103762	49.31189466	50.31505794
ENSMUSG00000003660	16.21562775	16.48856314	15.64935694	15.80040659	16.58522849	16.05855098	17.7170756	16.35107764	19.48281298	18.66701382	17.28742496	17.73626217
ENSMUSG00000003662	14.33756238	14.39916202	14.59535439	13.84918053	12.75236433	14.30810615	12.01367582	9.711314307	11.38948675	10.0602748	8.551134992	8.500501012
ENSMUSG00000003665	0.118097	0.272259	0.234551	0.36942	0.323125	0.218753	0.037432	0.19655	0.216161	0.285392	0.070645	0
ENSMUSG00000003680	2.262006555	2.04908301	1.846470945	1.615179025	2.269289764	1.911217346	2.356349058	2.778281301	2.953840467	2.31766778	2.307987796	2.277902709
ENSMUSG00000003721	11.49076268	11.25573931	10.92117971	11.25607321	10.64946116	9.860022281	6.314687369	5.444341885	5.718163593	5.639296166	6.026329989	5.56094586
ENSMUSG00000003731	15.90450036	16.86726677	15.37030358	18.36300845	16.63843539	17.15843194	17.42660824	15.05418544	17.63282416	16.41934102	15.9838744	15.65308365
ENSMUSG00000003746	5.98949306	8.202641228	7.453933872	5.442249259	6.380135167	6.912322587	3.016490715	2.681153324	3.131098965	3.046855633	2.564660892	2.257536669
ENSMUSG00000003752	1.281628542	1.481394727	1.668063936	1.64284372	2.195078386	1.932414897	2.342195051	2.287039607	2.33059447	2.220902855	2.047862904	2.687806556
ENSMUSG00000003762	3.08438701	3.740263607	3.098425056	2.969628025	2.751977782	3.175189265	2.123412897	2.368615903	1.837084294	2.62078547	2.237970702	2.083303956
ENSMUSG00000003778	3.203235706	3.201690088	3.110789669	3.573913045	3.523315106	3.075148435	3.644549083	3.333945898	3.8784952	3.785514924	3.82722121	4.022788496
ENSMUSG00000003779	1.727306595	1.755919463	1.450066312	1.396647916	1.569809825	1.687980543	3.214488982	2.12754617	2.07576378	3.208070155	3.397421521	2.206303932
ENSMUSG00000003808	5.702524807	5.523684054	4.346893771	4.961730598	4.328736222	5.037460255	9.13366484	7.105025428	8.777954004	6.717352702	6.672081917	8.059362038
ENSMUSG00000003809	6.837826672	6.500098977	6.384987653	5.989952288	6.919168456	6.759647448	6.000783785	5.286107703	6.310441641	5.383506042	5.126259767	5.709426435
ENSMUSG00000003810	10.15279262	10.95052331	11.88961936	13.23951883	12.41036821	13.14326895	17.18723787	16.70810519	16.77519955	16.35178442	15.36049856	18.32268444
ENSMUSG00000003812	6.407106794	3.729221572	0.386510196	0.937986365	3.335256063	5.965915471	4.252993137	0.558554262	11.19651279	10.77319195	0.531271425	0.442867358
ENSMUSG00000003813	19.77336501	19.17933617	20.40715243	19.53651962	19.1006292	18.51185117	16.17994673	15.58466091	14.43894041	14.04575022	13.99460454	13.73289073
ENSMUSG00000003814	116.1188503	111.9114048	108.0427334	110.378778	105.1532861	105.2292925	145.0724195	146.160914	144.6997156	139.6444512	143.8197366	144.2918957
ENSMUSG00000003824	2.086961998	2.184109635	2.275002405	3.268987532	1.888910207	2.129682422	6.532277329	7.70110266	7.502044066	7.489628574	9.731584113	8.987679215
ENSMUSG00000003847	1.106324701	3.834697307	1.41187381	3.907021642	3.681029727	3.68025063	1.669884732	1.042547598	1.756064559	2.013063124	1.598153635	1.41236075
ENSMUSG00000003848	6.207719608	5.521323963	7.064727157	5.224413095	6.006749494	6.212674648	5.551271238	6.783699224	4.528541097	4.143623688	6.423724047	6.362073092
ENSMUSG00000003849	3.048421	3.072339	2.718178	3.392415	2.680827	2.312566	1.619563	0.824135	1.054384	2.092317	1.680642	1.110288
ENSMUSG00000003863	21.38227259	17.25068358	20.23577847	19.27006807	18.96551717	21.87159146	17.34511451	16.15565508	17.69803227	19.63275979	17.21337879	15.33544425
ENSMUSG00000003865	4.063135683	3.312587834	2.869418771	3.685864684	3.552646919	2.915855648	3.300521222	4.228018449	4.385653567	3.971231661	4.107009254	3.609915553
ENSMUSG00000003868	11.35916564	9.694827543	9.436952844	8.287685405	8.314345225	10.48107696	13.98789219	15.74913949	12.93446116	14.65939617	13.61513717	14.57274616
ENSMUSG00000003872	19.94771724	19.82901406	24.95552364	18.16055048	16.36253208	22.01972215	18.74704534	18.2406734	18.14895494	17.50981125	16.58442882	12.42184494
ENSMUSG00000003873	16.98794468	11.69127856	16.7315821	14.57516895	13.81004984	15.34620227	25.9777166	29.44515862	27.0561722	26.43695229	29.11281543	29.58439676
ENSMUSG00000003882	0.059715906	0.028746652	0.085908201	0.148118975	0.171754677	0.026231637	0	0.029604512	0	0	0	0.02967056
ENSMUSG00000003923	6.489145598	6.326215324	5.963932026	5.270315073	5.600652302	6.453093929	6.891673005	6.086265163	7.112372457	6.670439414	6.967126289	7.267824121
ENSMUSG00000003929	2.891736	3.299242	2.618858	3.003354	2.780079	2.913356	2.774498	2.683518	3.77458	3.817036	2.80147	3.900819
ENSMUSG00000003934	54.266048	56.736977	48.034012	50.289982	54.757088	57.322838	118.702576	118.969086	117.963806	111.135338	123.279007	125.833115
ENSMUSG00000003948	119.2263828	100.1042898	125.5549313	116.5376202	113.3779304	113.856461	95.92265097	89.70634177	94.49375337	93.22622975	89.6549731	89.57537085
ENSMUSG00000003949	8.897961997	10.3142184	16.88824928	21.22624311	11.29558572	19.79690389	3.848792861	2.117132631	4.099255545	3.091390045	2.705092636	4.664745338
ENSMUSG00000003955	36.822556	32.272202	32.555672	29.954002	31.538315	35.512379	34.2458	34.292179	32.246975	31.221508	33.792347	31.976383
ENSMUSG00000003970	185.0797838	167.7633238	176.6820309	155.1733582	159.3947734	169.7481486	223.3350778	249.6851889	217.142219	247.6715796	230.3848249	234.9372656
ENSMUSG00000003974	11.623718	14.087871	11.699339	11.454385	12.455894	13.705041	12.926544	14.073291	16.348362	16.736828	12.683584	14.015138
ENSMUSG00000003992	6.863074769	8.297274117	6.97499967	9.46936131	7.171620625	8.153486734	12.00100975	11.60969368	11.37824526	10.26857086	10.51466421	11.91900897
ENSMUSG00000004018	1.74297706	1.483790031	1.457694851	1.308899316	1.514207867	1.604516681	2.232090541	2.674726692	2.364548012	2.014386136	1.864815502	2.366223978
ENSMUSG00000004031	3.739203435	3.447116849	4.801109293	4.698234391	8.823562917	3.807325703	4.188956556	3.887744502	4.606653697	4.750541835	4.33389416	3.79840887
ENSMUSG00000004032	88.04629289	93.95519095	92.4373149	86.06239521	90.6328441	95.76682309	53.4245588	54.91010252	55.5264684	58.58173789	53.40456256	52.0447278
ENSMUSG00000004035	13.28495598	14.28184887	14.53121265	10.93982351	15.53261936	12.71967899	6.456031141	6.820980131	5.319950643	6.56305612	5.455379244	6.144312788
ENSMUSG00000004038	0	0	0	0	0	0	0	0	0	0	0	0
ENSMUSG00000004040	3.770415132	4.374452626	4.632114514	4.99483348	5.584083001	4.867129849	5.572780207	5.502749534	6.57465059	8.1459647	6.609159402	7.713063966
ENSMUSG00000004043	0.167526375	0.302294519	0.20869867	0.232812872	0.225480541	0.226682507	0.160707666	0.131913065	0.137440793	0.199737447	0.309169253	0.150809075
ENSMUSG00000004044	7.533667538	8.406256954	7.807655077	7.122681363	7.215270743	7.104635609	8.610832279	6.48614564	8.445278879	10.20413032	10.08031749	8.404039921
ENSMUSG00000004054	6.52211	7.024021	7.056767	6.694521	7.205237	7.893715	5.592842	5.03851	5.671834	6.301158	6.127548	6.549704
ENSMUSG00000004056	10.21750136	10.68276372	9.643377458	10.09217478	11.87341057	11.5708901	13.77823281	12.28342514	12.99405945	14.19541943	13.80367823	11.58139685
ENSMUSG00000004069	13.63252124	15.43945576	12.42684276	15.60650386	14.65612296	16.62730635	13.51668486	12.34608788	14.61949799	12.69939746	10.48820501	12.53293467
ENSMUSG00000004070	26.69268942	32.31592233	37.38083372	26.19766479	25.59803841	25.61757761	20.5825536	20.82000013	21.59219634	20.23246993	23.06866482	20.5384929
ENSMUSG00000004071	25.05035764	22.78321948	25.40154591	23.20816156	24.48703596	24.12971813	11.53602712	11.43635881	12.35422038	12.59380668	12.6029966	12.2120716
ENSMUSG00000004085	0.814071027	0.738935798	0.834547527	0.74671042	0.791758748	0.796110942	1.143835023	1.011738596	1.086551499	1.090428625	1.085976523	0.942549356
ENSMUSG00000004096	26.54177662	28.53568843	26.24346258	25.50585537	27.29173677	27.37677578	22.42340569	23.59715239	26.20316124	26.41931132	25.15573148	26.52866235
ENSMUSG00000004098	0.071530023	0.102612997	0.077306632	0.024246841	0.174811625	0.162277965	0.159054459	0.314209617	0.286742146	0.125408496	0.233032441	0.163299745
ENSMUSG00000004099	6.278924791	6.227720282	6.091330285	6.543802194	6.191019736	5.880606001	12.50205018	12.13812281	12.29060601	10.79175819	10.65041098	11.94115406
ENSMUSG00000004100	3.236407817	2.818538102	3.007778416	3.237088294	2.989936606	3.249875717	3.789873518	3.538129661	3.026941054	4.36785049	4.339256555	4.166018756
ENSMUSG00000004105	1.385958192	2.658675366	0.632032391	1.979472487	2.242291328	1.748530137	1.347110251	0.841675927	1.156542454	1.846113938	1.54302319	0.819141089
ENSMUSG00000004110	4.611768063	7.804022375	7.799412692	8.773011987	13.28763282	6.05650969	4.670077719	2.378113077	5.457038231	4.343194022	2.745587563	6.857161169
ENSMUSG00000004113	9.398706793	11.93207325	11.99146658	10.18473547	10.83143765	10.10418609	18.6288756	15.3712522	18.60847456	19.049943	16.05594	16.0938775
ENSMUSG00000004127	0.531223848	0.559051346	0.552421836	0.40011564	0.383012259	0.600145981	0.729427446	0.522507188	0.55635664	0.46880883	0.746240092	0.533096243
ENSMUSG00000004151	7.140411827	7.294707477	5.503258483	7.467738686	6.922506051	7.562333955	5.068932413	4.039814252	5.064397525	4.388517766	4.405359545	5.340632973
ENSMUSG00000004187	98.07330796	89.20129262	108.4524112	106.2093816	99.62728886	100.4087258	64.29604037	56.231186	62.47968604	59.33033818	66.17423621	55.72338752
ENSMUSG00000004207	544.5717202	532.4593784	500.1313564	573.0554082	538.7927588	543.0732408	383.0734695	361.312395	378.3097059	393.356512	391.2319509	363.2222323
ENSMUSG00000004221	2.025289591	2.519239017	2.215755175	3.046214934	2.432951671	1.996774094	1.937253107	1.451739809	2.287483146	2.415367307	1.606424652	2.436774091
ENSMUSG00000004231	0.091045863	0.049944179	0.03742933	0.015980139	0.016507063	0.040797132	0.028926839	0.012936226	0.114887161	0.01708394	0.039204275	0.0034524
ENSMUSG00000004233	1.008663303	1.358128243	0.721371312	1.199367448	1.214338441	1.045438059	1.404058741	1.319548628	1.417844752	1.486628419	1.382711568	1.178165561
ENSMUSG00000004263	33.27450361	35.38438282	35.94615944	40.48415153	37.66737383	31.08221039	41.24277505	45.5597123	42.75576642	41.69796692	44.39130693	45.4211131
ENSMUSG00000004264	14.72014476	14.1916601	14.04405767	15.24501041	14.49022181	15.70671275	23.40787442	22.1368834	22.27450683	22.34151486	22.95410641	21.21605022
ENSMUSG00000004266	1.84063283	1.945933079	1.91938392	0.83206026	1.133670152	0.864679617	1.271376922	0.892119282	1.488407903	0.646890656	0.847821941	0.907880541
ENSMUSG00000004267	113.0291427	99.15094161	120.2039551	104.2406878	99.25531889	113.1911869	39.8961396	32.05700973	36.56651331	38.63614654	35.54215638	37.85712798
ENSMUSG00000004268	5.38796524	5.443594469	5.444483443	5.045687623	4.998868896	4.868338801	5.879605192	6.587625612	6.430412941	5.399745441	5.905338026	5.733763612
ENSMUSG00000004270	5.062352085	5.312991131	4.268887756	3.714458714	4.085533408	4.501171234	5.997082595	6.575818196	7.018865299	7.310707688	7.518157284	6.20771853
ENSMUSG00000004285	84.19520437	70.77443519	77.90208074	66.47388549	68.0233596	77.32379066	67.93696254	74.81754984	70.90139104	63.65643573	73.06876507	71.43474227
ENSMUSG00000004296	0	0	0	0	0	0	0	0	0	0	0	0
ENSMUSG00000004317	0.892285397	1.049831368	0.765248058	0.876453856	1.058047439	0.88681737	2.284907748	2.05535937	2.253899523	3.237325962	2.879357846	2.856775418
ENSMUSG00000004319	7.899787218	9.206894237	9.503133106	9.403223208	8.960829433	10.11198611	11.92961037	10.38650682	12.70297715	12.43333129	10.75689955	11.25232448
ENSMUSG00000004328	0.254994236	0.576818549	0.244060269	1.276705311	1.394544741	1.430154188	0.626469459	0.367121376	0.33123242	0.431084756	0.534660585	0.463228824
ENSMUSG00000004341	0	0	0	0	0	0	0	0	0	0.067096974	0	0
ENSMUSG00000004344	0	0	0	0	0	0	0	0	0	0	0	0
ENSMUSG00000004347	0.35029636	0.468585965	0.272926858	0.303576282	0.352084094	0.398696183	0.410870791	0.48616381	0.492821351	0.488209328	0.388930521	0.483053327
ENSMUSG00000004356	1.512429883	1.808734124	1.678759728	2.096490294	1.785804181	1.731924393	2.091525438	1.611114816	2.030999004	2.151324502	1.771750355	1.775426991
ENSMUSG00000004359	0	0	0	0	0	0	0	0	0	0	0	0
ENSMUSG00000004360	6.137652975	9.021486938	9.449001173	6.885780919	9.719474154	8.039160894	8.894774489	10.05102649	15.33337109	10.05852381	9.205615669	10.3881223
ENSMUSG00000004364	20.8919003	21.42895014	22.06371765	24.02985855	20.70606788	22.27394104	19.10279359	17.69898081	22.09804751	20.51945136	18.03938799	22.01810182
ENSMUSG00000004366	350.072388	318.330414	326.80127	345.397064	336.037842	351.193909	301.425934	324.618164	267.288605	257.513245	325.146088	301.813202
ENSMUSG00000004371	0.069598286	0.268537715	0.060240761	0.062052208	0.089050507	0.108182093	0.251098427	0.081696229	0.222177282	0.180215661	0.266985877	0.391408991
ENSMUSG00000004383	20.91984501	19.22124441	23.56254833	18.23794501	18.36218746	18.90219559	19.57871352	19.03342328	19.2965243	20.66547341	19.25848944	20.30524005
ENSMUSG00000004393	10.64696506	9.204699188	10.22793727	8.432946846	8.558889773	11.1501715	11.78170189	11.79192946	10.1936952	10.72583254	10.79179063	10.55071854
ENSMUSG00000004394	31.64270785	31.60418896	30.69376836	32.30520969	31.66668169	33.40249191	20.88216438	18.87169324	17.66312537	19.13189633	18.42240266	18.68705184
ENSMUSG00000004415	0.328419946	0.281355231	0.228856532	0.28168001	0.229933879	0.237060749	3.696344504	3.71549337	3.411635747	3.858532492	3.649965352	3.321771162
ENSMUSG00000004446	4.808860415	3.794650096	3.954164831	4.14785228	3.698847373	3.9758398	8.534083208	5.020597543	5.600602173	9.207945944	8.940458098	9.652919361
ENSMUSG00000004451	3.585020828	3.639245819	4.370572695	3.527124317	3.564692701	4.150176904	8.67383491	7.623879312	8.126723232	7.584301631	7.819018718	7.31527851
ENSMUSG00000004455	19.4344714	29.37442749	24.19297755	30.85507797	33.46519202	20.68963664	24.0709458	22.98970883	24.9696677	25.49135438	23.11681556	26.6556038
ENSMUSG00000004460	15.93558315	16.92210652	15.17902188	14.22236147	14.97719112	16.32539513	17.24782696	16.97368618	17.16885094	20.94220738	18.56544971	19.12112615
ENSMUSG00000004462	4.981845	5.278237	4.958134	4.478893	4.450529	4.682831	4.403461	4.464664	4.761786	4.126444	3.913182	3.661772
ENSMUSG00000004473	1.561741	1.272244	1.685723	1.33676	1.524574	1.691	1.080084	1.253575	1.003946	0.645812	0.756743	0.851054
ENSMUSG00000004500	2.840023144	2.720461115	3.048590598	2.474476058	2.463031547	2.205899495	5.232741968	5.041452878	5.476036879	4.987436827	4.010953215	5.966131605
ENSMUSG00000004508	3.390091889	3.747646	3.124534938	3.297312706	3.86837481	2.868336982	8.062061183	7.524846078	8.438917641	8.743934632	7.771279767	8.943860027
ENSMUSG00000004530	10.63194632	10.80234356	11.99572764	9.527651927	10.5515732	11.69490141	16.83647453	17.42336116	16.81289338	17.65121153	17.24085038	18.14576272
ENSMUSG00000004535	11.71367238	11.8638186	10.44721665	11.58662693	11.8539634	11.93343951	8.110889094	7.673983232	9.212827362	8.947176002	9.010006846	9.488484408
ENSMUSG00000004540	0	0	0	0	0	0	0	0	0	0	0.073085	0
ENSMUSG00000004542	0	0	0	0	0	0	0	0	0	0	0	0
ENSMUSG00000004552	0	0	0	0.027541425	0	0	0	0.02162417	0	0	0.023400755	0.024545575
ENSMUSG00000004558	149.9592711	146.2820403	152.2779762	152.3671149	150.269801	154.0581263	86.37934186	85.23040437	87.56293977	93.1551213	85.09717256	79.24009585
ENSMUSG00000004561	1.633600049	1.832444477	1.972460158	1.726517903	1.907688002	1.805952477	1.860423123	2.148289974	1.952088665	1.892220301	1.466599805	2.046847967
ENSMUSG00000004562	1.384954075	1.686109963	1.785676446	1.660739749	1.642490865	1.498308252	3.248432727	3.047163246	2.981714804	3.177981552	2.845712179	2.901446812
ENSMUSG00000004565	3.050098568	3.137132849	3.156748526	2.783636997	3.260267563	3.388783594	4.871334376	4.445743054	4.946357445	4.194505932	4.177282091	4.615048812
ENSMUSG00000004567	5.495757437	5.30918709	5.272327924	5.384405062	5.507177061	5.670676671	4.152172173	4.139996589	5.1899025	4.067404307	5.079712039	4.810573885
ENSMUSG00000004568	6.079443896	6.537566646	6.507222894	6.950111073	6.331734133	6.804442109	5.788062568	5.057230424	5.728800968	5.214000027	4.43642912	5.054013159
ENSMUSG00000004591	1.056393583	1.789194688	1.085940236	1.327201088	1.629854421	1.549748813	0.913412001	1.080233127	1.12689741	1.21178487	1.079657371	0.975422432
ENSMUSG00000004609	0.770192957	0.579717683	0.793945452	0.656571253	0.468467905	0.562468953	0.370180603	0.352541577	0.523400752	0.517952559	0.444675896	0.356026327
ENSMUSG00000004610	24.34069715	24.11757111	20.56037577	19.50743314	18.56411507	18.79897536	13.1568906	14.84737725	17.12580546	20.82693712	17.14949241	14.41523154
ENSMUSG00000004612	0	0	0	0	0	0	0	0	0	0	0	0
ENSMUSG00000004626	2.73180081	3.400604548	2.183469921	2.512167892	3.175405423	2.948862033	2.921850119	2.908588639	2.82081013	3.44001624	3.033184369	2.74226159
ENSMUSG00000004630	0.837451687	1.383889673	0.313951854	0.907875841	1.078617889	0.718237815	1.118361997	1.212493101	1.17415644	0.945510536	0.723296539	0.907516512
ENSMUSG00000004631	2.005653369	2.041388611	1.863131981	1.748313028	2.10567681	1.971823424	2.021181935	1.806190077	1.699876306	1.660217758	1.508377499	1.680107389
ENSMUSG00000004633	5.479341109	5.944852539	4.565486619	3.561703021	5.547498033	5.803763284	6.033038976	6.088513442	6.327282467	5.426560943	5.034654449	6.020305029
ENSMUSG00000004637	1.026202713	1.225728345	1.165202927	1.371479038	1.207282887	1.324182346	1.252057741	1.201229861	1.326593071	1.356919292	1.332107543	1.320238854
ENSMUSG00000004642	2.045866451	2.000977874	1.95155048	1.945271617	1.783999065	2.361626576	3.019189673	2.631658798	2.998132734	3.263909987	2.957121909	3.142096966
ENSMUSG00000004651	0	0	0	0	0	0	0	0	0	0.012826075	0	0
ENSMUSG00000004654	0	0	0	0	0	0	0	0	0	0	0	0
ENSMUSG00000004655	6.321817	11.544507	0.215788	9.962749	9.94287	7.761692	0.518871	0.471479	0.51955	14.323665	10.099696	0.615399
ENSMUSG00000004661	0.548796426	0.620722954	0.412151174	0.385051453	0.42597709	0.383973862	0.479748014	0.493487451	0.605931582	0.397859346	0.493814605	0.570127274
ENSMUSG00000004665	2.75192	2.983717	2.48466	2.945146	4.187928	2.828411	5.730652	4.65	4.6908	6.133166	6.13167	5.888652
ENSMUSG00000004667	20.11977304	16.3526429	20.23732174	15.51775549	19.62304177	18.68424461	15.40313108	18.43397082	17.25153699	18.48918853	16.61610128	18.88983321
ENSMUSG00000004668	0.007166295	0	0	0	0	0.00904183	0.003963609	0	0.005027926	0.00465071	0.042276601	0.011748052
ENSMUSG00000004677	3.542255138	4.422813082	3.641421849	3.494456677	3.381651836	4.252040055	3.507689791	3.612153804	3.790087559	3.400028171	2.843086795	3.016059709
ENSMUSG00000004698	2.095936384	2.386296733	2.410924934	2.560489364	2.079547208	2.358316151	3.150973473	2.869704639	3.870296035	3.438260818	2.735619618	3.059716372
ENSMUSG00000004707	0.042700761	0.135589605	0	0	0.079281959	0.055115933	0.035327042	0.171635135	0.073787595	0	0.158356272	0.162388081
ENSMUSG00000004709	0	0	0	0.017905496	0	0	0	0.01410694	0	0	0.015737867	0.013465365
ENSMUSG00000004730	1.461791132	1.95124	1.444993258	2.039146732	1.856858	2.279632	2.03618	2.173529403	2.353246	2.496318	1.98892	1.790078
ENSMUSG00000004748	51.91342492	42.22677161	50.8899973	47.76848436	45.41892858	44.68210774	16.91208225	13.15958569	14.67089665	13.28552924	12.69542051	10.95448423
ENSMUSG00000004768	1.643785057	1.265933272	1.755212306	1.507619155	1.661095149	1.757915012	2.072362805	1.975324495	1.814466582	1.93758357	1.9107055	2.083262375
ENSMUSG00000004771	26.50427454	31.6119494	27.95035259	30.00434368	26.55295026	26.78517423	51.37607091	50.14547572	54.39538626	53.97104761	52.44540182	52.09756062
ENSMUSG00000004788	12.85757723	13.16198288	12.39702269	11.99605511	12.81459728	13.91602178	14.37768784	14.73073054	15.10984946	13.94069112	14.82285528	14.07278294
ENSMUSG00000004789	4.74238843	6.098404657	5.392546779	5.139512394	5.52115492	5.265416604	6.212650398	6.025761016	7.098778488	6.247297575	6.343264433	6.666626491
ENSMUSG00000004791	1.035340169	0.981857097	1.530438578	0.872052113	1.095385182	1.146928763	1.425397864	1.087172973	0.910397016	1.466061563	1.011178999	0.870924879
ENSMUSG00000004798	16.41773391	18.05893145	17.85283183	17.16546558	17.36323307	18.88487942	31.21469513	30.50308849	31.22413547	30.17291113	27.65789989	29.05141661
ENSMUSG00000004814	0.09721	0.166887	0.121109	0.189897	0.129793	0.137217	0.390056	0.142498	0.25393	0.14319	0.23644	0.41599
ENSMUSG00000004815	3.123360759	3.346704456	2.905956015	2.798858589	2.835688125	3.259784652	2.80085563	2.021726611	2.214860239	2.17645744	1.928286702	2.054570473
ENSMUSG00000004821	0	0	0	0	0	0	0	0	0	0	0	0
ENSMUSG00000004837	2.528358054	2.586334323	2.616751797	1.992050212	1.876643639	1.669155035	3.004519663	2.994451262	3.460916172	2.62874823	2.77996891	2.299448838
ENSMUSG00000004842	0	0	0	0	0	0	0	0	0	0	0	0
ENSMUSG00000004843	26.887253	27.998529	28.435028	25.777615	25.262991	25.780163	38.351692	38.004917	40.899014	42.246071	36.28751	39.575687
ENSMUSG00000004846	5.685920737	5.395122329	5.166201733	5.719657135	6.006445362	4.141475671	5.705527526	4.693037745	6.344388255	5.665003675	4.088520153	5.795080456
ENSMUSG00000004849	94.12078296	76.04345904	89.9755831	89.68223351	69.48490252	83.0754507	58.10566797	53.28491286	52.11512822	56.05023088	51.59303365	54.61423795
ENSMUSG00000004864	0	0	0	0.341962463	0	0.060475587	0.101757778	0	0.112047714	0.158085905	0.076130063	0.226432
ENSMUSG00000004865	3.990011379	3.710983215	4.311272205	4.393543527	3.985865593	3.999584744	6.331913022	5.845108485	5.694581815	5.284071319	4.840863008	5.022492035
ENSMUSG00000004872	0	0	0	0	0	0	0	0	0	0.013836745	0	0
ENSMUSG00000004880	1.760590525	1.977243963	1.859994754	1.999914	1.8596053	2.361273849	2.800501076	2.356059734	2.419363314	2.864926799	2.826075948	3.063450191
ENSMUSG00000004885	0.373052324	0.896214109	0.691390556	1.325461003	0.443182989	0.310790702	1.400535421	0.803254766	1.49017858	0.754161113	0.576416821	0.889541462
ENSMUSG00000004891	1.785197519	2.359431036	2.331602401	2.280116481	1.918393608	1.85519091	6.671767932	6.020231752	7.116024126	8.101862385	7.037200456	8.50434318
ENSMUSG00000004892	37.16152635	38.12071442	40.44423411	38.92418716	40.32698908	35.85350825	47.50724648	42.87212932	49.15634524	42.33099766	41.78153433	42.10654801
ENSMUSG00000004894	3.16251853	4.207829093	2.544193585	3.080361701	5.451764215	4.309233124	0.030164243	0	0	0.134541004	0.015682298	0.130941805
ENSMUSG00000004895	23.291143	20.681194	20.851524	20.9517	21.235844	21.541582	25.319592	28.826702	27.974258	25.560287	26.56048	28.876703
ENSMUSG00000004896	2.13786197	2.274368893	1.842929157	1.827127356	1.956185656	1.751780118	1.524433499	1.901369339	1.453003468	1.28212081	1.633655555	1.661908768
ENSMUSG00000004897	46.05100602	47.50000297	50.82825664	47.2759686	44.97198558	43.97166447	41.98906055	42.95457424	43.67600616	44.49740167	41.97649101	42.88021201
ENSMUSG00000004902	25.771591	26.939552	27.471424	32.108662	23.354752	25.159897	22.985653	23.884464	21.988791	20.773327	19.795849	20.239517
ENSMUSG00000004929	10.67146403	9.456016812	11.51175862	9.867580592	9.89389506	9.125544408	14.06644568	13.8373371	13.62902643	11.99641901	12.19835063	12.85770509
ENSMUSG00000004931	3.049309257	1.931781002	3.062152144	4.519359898	2.959363124	4.343370778	2.424352288	2.627773768	2.16903317	2.814887349	3.140555051	2.417911265
ENSMUSG00000004933	18.45568014	16.29186934	19.60313587	16.53869185	16.63158739	19.2455017	16.41557646	14.78791798	17.23042623	15.46203164	16.61097678	17.03212005
ENSMUSG00000004934	5.839440014	5.337653342	6.033684407	5.834128746	5.478888032	6.135166408	6.477958157	7.340125162	5.655435287	5.556641527	7.002199372	6.148700643
ENSMUSG00000004936	86.89314553	77.09328109	90.18313478	85.15757603	79.37897231	85.78357561	28.77369633	24.56314236	27.9105066	26.73897677	27.53543504	22.33220555
ENSMUSG00000004937	39.45543167	38.75585371	40.44415626	40.48712316	38.85535725	36.10101747	50.88196595	54.73886723	49.97774918	45.09707174	51.10949634	53.31517747
ENSMUSG00000004939	0.076292	0	0	0	0	0	0	0	0	0	0	0
ENSMUSG00000004945	16.25967754	16.54403898	15.85078992	14.21299472	15.90413603	16.09912153	19.34686076	16.88102562	16.57257885	16.70316947	16.4181522	15.56076356
ENSMUSG00000004947	1.266291625	0.940493197	0.994964238	0.809667973	1.089622502	1.137980732	1.843321525	1.98589981	1.74069753	1.698113471	1.848662453	1.70864882
ENSMUSG00000004948	0	0	0	0	0	0	0.059133	0	0	0	0	0
ENSMUSG00000004951	6.493482498	8.305226566	6.680867823	12.1752918	10.43181799	9.698316599	2.983490758	2.204769512	2.408414488	3.000592813	4.069532348	3.453290566
ENSMUSG00000004952	0.257822455	0.433733734	0.271368815	0.226674475	0.172031544	0.279223895	0.473573407	0.403347688	0.426796603	0.417496958	0.565038651	0.609089379
ENSMUSG00000004961	55.43878103	49.29348994	53.43569218	59.38691966	52.46915001	57.22364787	52.39867143	55.02573562	48.99074088	48.54476895	53.91556674	51.07583663
ENSMUSG00000004980	34.33013112	36.79857014	33.74645213	32.97456461	35.90575939	35.37994824	47.89794832	46.05134801	50.59073421	52.36262522	45.42119461	52.2336633
ENSMUSG00000004988	0	0.020447762	0	0	0.049605473	0.117744195	0	0	0	0	0.039081763	0
ENSMUSG00000004994	2.983466144	3.62937435	3.083061199	2.727506719	2.98076638	2.29778118	3.042642431	2.880745219	2.284570019	2.339018568	2.582734867	3.096749418
ENSMUSG00000004996	3.345220077	2.881226297	2.932682796	2.82106343	2.963000968	3.034274517	3.695894836	3.686204718	2.800357054	3.584212333	3.163441129	3.722915854
ENSMUSG00000005034	29.37807885	29.3857355	28.69519692	33.39449151	12.51026026	33.15564917	14.42409416	33.55391534	33.61545378	29.97543394	12.78641142	13.56150587
ENSMUSG00000005043	1.844181685	2.249812505	1.908419303	2.059765794	2.151141909	1.985457459	1.755834478	1.480185625	1.771660436	2.049934939	2.147742383	2.109494754
ENSMUSG00000005045	22.49672617	23.32632814	23.70740182	27.80992344	25.07730453	26.3360552	38.61547369	34.69761101	37.92892182	36.30244467	32.17151054	35.67316477
ENSMUSG00000005054	22.415171	23.892693	23.696789	24.755438	26.405115	22.829653	24.439829	25.41324	26.852278	23.569157	25.205664	27.391914
ENSMUSG00000005057	0.792477393	0.834732834	0.630643222	1.128201941	1.090603868	0.830157513	3.21016357	3.01077476	3.387518802	2.493444385	3.101478245	3.049949945
ENSMUSG00000005069	10.3255102	10.4103264	9.845235339	10.21096401	10.08511962	8.349844832	11.9595504	12.2005804	14.79020917	15.28325813	14.72838432	15.14018373
ENSMUSG00000005078	10.52366736	11.05950986	11.02502351	9.758422021	11.04601118	10.32687468	11.73523025	11.20427975	10.02245352	10.39980651	10.52943513	10.78769092
ENSMUSG00000005087	0.322529105	0.435249942	0.147040659	0.831069149	0.475885921	0.330031285	1.454040955	1.105951211	1.942406373	1.231608612	1.406337183	1.439266641
ENSMUSG00000005089	144.3142735	48.76786763	170.4208167	175.3134704	182.2246197	165.8856658	24.09826817	64.04513426	28.87340019	89.69690276	72.86038168	67.91432375
ENSMUSG00000005102	2.710701189	2.832935294	2.321020091	2.842695946	2.605625713	2.706834535	2.867158751	2.748356245	3.133880411	2.848912927	2.568942257	2.799436233
ENSMUSG00000005103	17.31872587	17.27120754	16.74995113	16.96911479	16.67004055	18.38417939	23.72125793	22.7801021	22.62298755	25.50242314	25.45737184	22.77695732
ENSMUSG00000005107	0.615177599	0.367831693	0.361246135	0.323981789	0.483694872	0.641196569	0.715344727	0.656191798	0.967358924	0.964009671	0.706350165	0.536357644
ENSMUSG00000005124	0.123526917	0.169118735	0.188643038	0.099466146	0.11241793	0.17247094	0.12652192	0.136773622	0.259121771	0.165216072	0.232493528	0.080211118
ENSMUSG00000005125	16.52496358	19.19951085	14.66974611	16.28629542	22.25702162	21.1815691	16.41179764	17.1778957	15.87389538	15.45453279	16.54416707	16.45938574
ENSMUSG00000005131	0.017975988	0.131004765	0.022882719	0.098269399	0.15188268	0.12875679	0.044138127	0.02671246	0	0.070145007	0.104154895	0.065959389
ENSMUSG00000005142	4.365389033	4.663592085	4.001351048	4.627133931	4.615771449	4.708280849	3.656983341	2.909155093	3.50710368	4.078568111	3.40613764	2.855503137
ENSMUSG00000005148	0.701926876	0.981995128	1.073637227	1.428488498	1.090777621	0.621137326	1.231076076	1.218014347	1.232620678	0.798566473	1.119393614	1.417022756
ENSMUSG00000005150	5.781250276	5.799989722	5.882292308	6.500441777	5.93904886	6.836019509	5.932127969	6.227031085	6.174505454	6.067918144	5.602953535	5.791975499
ENSMUSG00000005161	48.50046991	46.13096934	43.75735965	42.60119472	41.79401417	46.30221308	81.00232917	83.33846389	77.11609629	83.65527872	81.2349536	83.44400564
ENSMUSG00000005198	14.38749918	15.54276585	16.05640326	17.00417507	15.8929825	14.95929786	16.04023427	13.11780098	16.48741631	16.45104126	14.99817906	15.82202741
ENSMUSG00000005202	0	0	0	0	0	0	0	0	0	0	0	0
ENSMUSG00000005204	14.98225081	16.22090877	15.56726605	16.5182797	17.26869416	16.11901725	16.18062677	19.85221302	18.40360835	16.39880981	19.94273455	20.18504707
ENSMUSG00000005220	0.012354882	0.292701685	0	0	0.016590224	0.033866531	0	0	0	0.019745122	0.014211446	0.014409527
ENSMUSG00000005225	1.744601555	1.919864619	1.787734042	1.872570403	2.11901193	1.780580408	2.077308054	2.058599512	2.407292015	2.181736098	1.959166313	2.18768816
ENSMUSG00000005232	0	0	0	0	0	0	0	0	0	0	0	0.036591127
ENSMUSG00000005233	0.16638095	0.107659248	0.075952444	0.155645271	0.282412525	0.057364524	1.272216231	0.987372054	1.163751973	1.371376017	0.99107682	1.348340018
ENSMUSG00000005237	0.203126259	0.413237818	0.165143072	0.302767413	0.263661002	0.262890181	0.601904501	0.508208386	0.483788402	0.674111461	0.560460002	0.367232293
ENSMUSG00000005251	0.23043548	0.575411616	0.061322517	0.439371587	0.202532944	0.27642145	0.249937904	0.251711779	0.294878442	0.46157644	0.256963152	0.274393462
ENSMUSG00000005262	6.841930419	7.279286228	6.662473095	7.930114624	6.768541347	7.558794529	8.074483754	7.493063882	7.466253873	8.169295874	6.608286318	7.748799175
ENSMUSG00000005267	1.302816519	1.520754177	1.390086642	1.466185736	1.140152157	1.357603813	1.444566817	1.349656477	1.448403757	2.026173857	1.491850725	1.763808298
ENSMUSG00000005268	1.110988155	2.578164946	0.156718052	2.515181566	2.737327549	2.032346221	0.08375833	0.020393302	0.044603619	0.031975074	0.00885674	0.009248511
ENSMUSG00000005299	9.310423032	8.945470602	9.157297136	9.647897504	8.299379442	8.854465907	10.88485399	10.57110125	9.916984279	11.10139823	10.31197621	11.09014245
ENSMUSG00000005312	37.47475523	39.215734	37.51598609	42.2899905	40.0390721	38.81783071	39.15112266	38.53124973	40.36225686	40.82910499	40.67713967	41.68015721
ENSMUSG00000005320	0	0	0	0.024074131	0	0	0.077305054	0.100448239	0.027293963	0	0.054164215	0.087651496
ENSMUSG00000005338	48.44487804	34.74237263	54.23029857	55.47298231	46.521826	47.75450677	54.23855581	51.52613982	54.26527934	49.94100868	52.33190475	49.49153216
ENSMUSG00000005339	0	0	0	0	0	0	0	0	0	0	0	0
ENSMUSG00000005354	12.9174257	13.2822912	14.96104543	12.164604	12.79380424	13.57502562	12.50161466	10.44307323	11.2965532	11.99295335	11.01144599	11.3158221
ENSMUSG00000005355	0	0	0	0	0	0	0	0	0	0	0	0
ENSMUSG00000005357	3.253138505	2.882615951	3.37707816	3.825514502	2.824654625	3.764419163	7.85356601	9.015621565	7.549826973	8.041372022	7.394791384	7.243327993
ENSMUSG00000005360	57.1854803	64.4208804	64.14463192	62.74063172	64.27462716	60.89510842	74.42403096	68.56675374	74.78414091	75.26976634	69.02697294	72.19916419
ENSMUSG00000005362	8.067065497	8.518869318	7.391635973	8.525087975	7.987974336	8.403649599	5.318331786	4.714065467	5.602648637	5.86020265	5.230431662	5.437446331
ENSMUSG00000005364	0	0	0	0	0	0	0	0	0	0	0.064325	0
ENSMUSG00000005370	3.875247	4.453521	4.144418	5.187478	4.562656	4.773925	6.720582	5.496592	6.147718	6.898228	4.9494	6.054509
ENSMUSG00000005371	25.30511384	27.12216801	28.44389923	28.27790078	27.13250519	27.44048089	25.88416453	23.79528811	29.52260915	27.41396196	18.15395094	27.93959266
ENSMUSG00000005373	0.18785375	0.252963802	0.410075296	0.2372928	0.180470842	0.189792767	0.150878318	0.125722581	0.076495393	0.078630391	0.096166944	0.032560066
ENSMUSG00000005374	3.914664718	3.670453752	4.240282509	4.350623652	3.286378593	4.112007589	3.748864674	3.569302363	4.230886444	4.311064389	3.296846326	2.985214518
ENSMUSG00000005378	9.534368224	5.715516573	9.118542549	6.092436727	5.808696053	9.417869309	8.09127279	8.181164307	5.593072209	7.954662775	4.989610376	7.704412343
ENSMUSG00000005397	2.426870014	2.510219988	1.911200466	2.047819654	2.419047341	1.552450203	9.831596936	7.683844599	10.96240271	10.08670822	10.01039332	9.192635867
ENSMUSG00000005410	1.071633784	1.05056044	1.502411568	0.838448462	1.159353397	1.285160356	3.758808637	4.137537726	3.939017356	4.381525367	3.385023991	4.229775948
ENSMUSG00000005413	3.690979492	2.521712613	3.241829073	3.165122827	3.385241133	3.251102851	3.848340214	2.907381367	3.554363949	4.725259314	5.505284784	6.20349796
ENSMUSG00000005417	23.0631342	25.89503829	25.17529817	25.81614997	23.88978069	24.06261437	23.67107352	22.92680771	24.0150641	25.14876531	22.34912694	24.32435765
ENSMUSG00000005442	12.5043414	15.48706632	16.78483641	16.7490415	15.94346657	15.20138272	27.71344749	25.47016682	28.04358366	28.59362838	27.86751905	25.40898341
ENSMUSG00000005447	2.862155204	2.887993709	2.598694042	2.590990535	2.459313315	3.11501119	18.05224069	22.5736624	18.97646154	18.67630181	16.24387951	19.67695115
ENSMUSG00000005465	0.39637519	0.056438295	0.221898433	0.247683273	0.263779015	0.138245986	0.115340829	0.141432103	0.232250142	0.234202106	0.149335851	0.32393158
ENSMUSG00000005469	71.47438338	66.62404808	72.75741709	73.86462705	65.47836841	61.94818172	71.03664857	72.23235725	67.49330627	68.04358965	71.92838775	71.41104691
ENSMUSG00000005470	0.252783706	0.231094029	0.308618878	0.037343045	0.285972934	0.309750498	0.915168335	1.018126445	1.141305145	0.928079957	1.194089577	0.855597222
ENSMUSG00000005474	0	0	0	0	0	0	0	0	0	0	0	0
ENSMUSG00000005481	2.18827092	1.792497869	2.216023081	1.764822698	2.060254394	2.068274303	3.839213539	3.711517641	3.459067161	4.137935251	3.778915161	3.566234113
ENSMUSG00000005483	15.28219175	14.64964422	15.25930365	22.25040137	22.59088003	22.55721289	17.40213537	17.9090878	19.16095051	18.24667868	18.43663029	17.54383985
ENSMUSG00000005493	0	0	0	0	0	0	0	0	0	0	0	0
ENSMUSG00000005501	0.905064824	1.054370831	0.783942831	0.544283992	0.574283324	0.7610099	0.55115801	0.599378028	0.889486842	0.925853243	0.484728765	0.935623144
ENSMUSG00000005503	0	0	0	0	0	0	0	0	0	0	0	0
ENSMUSG00000005505	8.832876453	10.05806241	9.183626384	8.176902038	7.770032829	8.661823824	5.452045348	10.75548846	9.860056698	10.47282807	9.69703966	8.858952601
ENSMUSG00000005506	19.88969496	17.54085692	22.73752895	22.44010784	22.13626752	22.39064249	19.18202335	17.27821481	16.00060563	18.47380512	16.86713297	19.56055504
ENSMUSG00000005510	36.39943324	32.44488665	37.16760064	30.53574691	30.31877927	34.24052846	28.64626536	28.29933709	28.86363731	26.60814088	28.56451183	28.05714744
ENSMUSG00000005514	17.44409069	18.02621089	17.80506289	17.25509473	19.44955238	17.97203855	15.86422378	17.19158859	15.51479512	17.70836462	17.23714383	16.42213834
ENSMUSG00000005533	2.541279795	3.511513442	2.943730559	3.751914173	3.484601543	3.399366277	2.754258162	2.686007451	3.116107468	2.413844379	2.214279314	2.517664923
ENSMUSG00000005534	2.484572044	3.483405956	3.200903853	1.895529531	1.776017291	3.598619056	2.234497196	3.326051317	4.14108152	3.807770513	1.423691344	3.558468362
ENSMUSG00000005540	0.039736767	0.180799318	0.184728618	0.033878708	0.245894903	0.049232638	0.121979447	0.072620642	0.084993698	0.210700144	0.067206343	0.04831684
ENSMUSG00000005547	0.065669634	0	0	0	0.042927492	0	0.150955579	0.073075881	0	0	0.037018614	0
ENSMUSG00000005553	0.093645592	0.163422754	0.218479659	0.224235627	0.153635699	0.12156173	0.949742641	0.865323957	1.191575162	1.03961148	0.922243567	1.139871764
ENSMUSG00000005566	25.45129129	24.06326856	25.57784435	24.42449081	24.80432599	24.93439286	35.87396157	40.97664108	38.31957838	39.91341123	40.34958729	41.02503177
ENSMUSG00000005575	24.48056917	21.2676598	25.19694869	22.38404522	36.37541127	34.93487832	25.96446528	36.1608884	30.86236491	37.61253183	39.43655881	33.51226007
ENSMUSG00000005580	11.50396154	15.54932295	15.55264484	16.45668499	15.94673448	16.63869185	6.247588532	4.36878728	6.143673941	7.124994804	5.526377825	4.671139272
ENSMUSG00000005583	1.34587789	2.94095219	2.984447839	3.343379183	1.851726077	2.815400407	2.382402816	3.431017394	3.849145524	3.148821364	3.055480125	3.694458921
ENSMUSG00000005609	7.553174643	7.551619035	6.644988303	7.419556113	6.703509522	7.463441831	10.09751277	9.507968521	10.9576408	10.09010417	8.811404971	10.70634513
ENSMUSG00000005610	46.52110541	54.8059558	49.33045382	55.99058133	58.3516413	54.38984663	106.2786072	104.4279637	114.3442862	108.8467359	101.1632128	111.2334541
ENSMUSG00000005611	0.361111494	0.582065895	0.282692169	0.762069252	0.448812229	0.45529659	0.142820913	0.31700677	0.232855782	0.215299673	0.40289996	0.205875826
ENSMUSG00000005615	6.217013152	7.007382527	5.977476499	6.638934698	6.878127671	6.617375746	10.58008007	3.941784442	9.448123748	11.21552659	10.51324716	10.58563949
ENSMUSG00000005621	3.487806434	3.978713471	4.214723935	4.419829594	4.524969526	4.515731349	5.421369982	5.180850473	5.695884681	6.145840886	5.42775728	5.96367713
ENSMUSG00000005625	28.96982329	25.56343249	26.62309268	23.90915427	25.15870512	25.54688515	24.40226289	25.91853197	26.53329382	26.91279062	27.42349541	27.53898599
ENSMUSG00000005628	0.022562586	0.17951487	0.02433774	0	0.248022412	0.05325463	0	0	0	0.214914225	0	0
ENSMUSG00000005640	0	0.027016313	0	0.061067743	0	0	0	0	0	0.038077492	0	0
ENSMUSG00000005649	0	0	0	0	0	0	0	0	0	0	0	0
ENSMUSG00000005656	10.39673225	11.2639981	9.696699256	10.65101435	11.23117104	10.98369872	16.66015291	16.07446245	16.56431822	14.86062329	14.8606158	14.98406005
ENSMUSG00000005667	1.872605979	1.983315309	1.544905022	1.583734648	2.131513726	2.237516143	3.968118068	3.455957305	3.237823319	2.674180691	2.917729438	3.772659358
ENSMUSG00000005672	11.28945197	9.036214127	11.50026932	11.29319875	10.59468447	10.72348725	15.02784579	13.15700966	14.6584614	13.27943425	12.56613197	13.20587605
ENSMUSG00000005674	9.685773903	8.607383068	10.15733833	9.05528997	9.250497988	8.636433727	8.200009959	8.276298622	8.052699357	8.706376533	7.768400565	7.656598879
ENSMUSG00000005677	2.939589519	2.083484486	2.397986556	1.928177472	1.683036353	2.355718355	0.917323414	2.022756353	0.640549405	0.885968904	0.871071254	0.887051544
ENSMUSG00000005681	0.460950547	0.64680451	0.292058432	0	0.49936454	0.340554615	0.654124034	0	1.162843441	1.361092749	0.499449426	0.505694365
ENSMUSG00000005682	1.391980338	1.336978348	1.31198484	1.297818164	1.464561947	1.097174284	1.484451428	2.021571477	1.762036539	1.807174233	1.500676079	1.924570812
ENSMUSG00000005683	41.86175508	40.50951707	43.93535067	43.46171168	42.04739505	43.33729235	58.25133393	54.64643931	56.10147501	56.10928642	56.15486824	55.54397616
ENSMUSG00000005686	2.884823659	3.2272482	3.224299787	3.373117828	3.655007207	3.224259702	3.922546159	3.495343678	3.983785724	2.420891536	2.077234426	1.994287385
ENSMUSG00000005687	7.113034499	8.091712455	7.316838504	8.203865008	7.14308867	8.034523384	9.319890868	10.23640133	9.789069177	9.45943649	9.493987322	10.70501919
ENSMUSG00000005696	1.478995493	1.412331315	0.964495072	0.998788296	1.024141123	0.913558534	0.972046589	1.226497858	1.108574915	1.128529681	1.544640214	1.626031554
ENSMUSG00000005698	11.47274154	10.27668208	11.46899735	13.16142352	10.99746656	11.08729476	13.29153471	12.60353056	11.79967428	12.58954299	12.21782246	11.92004862
ENSMUSG00000005699	9.158324817	6.579547046	7.056808612	10.69760051	10.27667118	5.160764078	10.22937258	9.2359057	9.018111391	9.257760861	11.69723971	10.13279446
ENSMUSG00000005705	0	0.078424241	0.072218209	0.025119031	0	0	1.045351799	0.191935566	0.147711791	0.188661187	0	0.230243556
ENSMUSG00000005716	24.64333463	18.42513789	21.41890802	20.67743072	21.27025386	23.0702445	0.299854533	0.321723003	0.198015657	0.6103838	0.218694083	0.148744261
ENSMUSG00000005718	1.142534504	1.461679465	1.027919818	0.811112174	0.901140736	0.800795074	1.384697612	1.97201619	2.117991146	1.600840264	1.07745286	1.796130469
ENSMUSG00000005732	25.39198518	27.42935793	30.6160828	22.79570975	28.31640858	30.60120676	39.11118464	42.77175048	39.68262027	36.19457053	36.76327092	44.60624881
ENSMUSG00000005763	0.438568824	0.958589336	0.916737741	0.843341354	0.612674482	0.830138161	0.624697185	0.763416665	1.096624514	1.105136324	1.023265897	0.828778759
ENSMUSG00000005774	2.879906307	2.715969598	2.852457982	3.007241866	2.718702774	3.396210826	2.041605159	1.312057942	2.049469204	2.185763305	2.436425355	2.226747116
ENSMUSG00000005779	58.71449945	59.99114729	57.66400646	48.09821388	51.41838524	58.9395822	63.44942543	67.57463476	59.05033686	66.48995147	64.12861328	65.37287826
ENSMUSG00000005800	0	0.031511	0	0	0	0	0	0	0	0	0	0
ENSMUSG00000005802	7.286199611	9.842258897	7.720706855	8.052013101	8.161756762	8.072905551	8.889516068	7.911200609	9.947366527	10.69496792	9.980864159	10.66942388
ENSMUSG00000005803	0.922315037	1.777934762	1.151080647	1.302278232	1.384798371	1.183511461	0.704362612	0.576773389	0.474123357	0.608946738	0.455599247	0.553665446
ENSMUSG00000005804	3.642587523	6.413593883	6.889902535	3.676448863	2.496545846	2.488821117	6.882462536	6.289788223	5.10510782	5.460570264	4.841376102	5.904221501
ENSMUSG00000005813	6.019769707	5.086451031	5.806272526	5.334492668	5.392253223	5.861732787	8.234383058	8.572953796	8.23152943	9.007681371	7.749683934	8.719001512
ENSMUSG00000005823	9.026909	8.119203	7.191755	8.017487	8.746071	6.887889	3.175177	4.124176	3.732471	4.635994	4.281047	4.337531
ENSMUSG00000005824	0	0	0	0	0	0	0	0	0.037253	0.097088	0	0
ENSMUSG00000005836	0.022142	0.072256	0	0.027335	0.053668	0.042942	0.048987	0.082059	0.021755	0.028738	0.071998	0.023225
ENSMUSG00000005846	18.89068656	18.14023992	17.80866004	16.9208052	16.87233595	15.86932255	20.91558328	20.31007172	22.35826202	23.82694572	20.03633502	24.21666749
ENSMUSG00000005864	0.022850807	0	0	0	0	0.050449577	0.04657577	0.068590041	0	0.059912832	0	0
ENSMUSG00000005871	14.75346733	19.93167002	16.1545639	19.25974985	18.54137107	17.45138414	8.620259815	26.28176646	47.55457665	44.31110556	30.39169319	36.59119173
ENSMUSG00000005873	130.29274	131.261215	130.506622	129.656693	124.476921	132.924713	171.222458	162.313904	168.516556	164.29837	167.204117	167.333466
ENSMUSG00000005881	35.94121481	38.15854519	36.29806663	33.41528222	36.95646436	36.36893044	40.72095826	44.6942708	45.69487121	43.38498824	44.78338276	40.54150327
ENSMUSG00000005882	7.530364506	4.755787782	5.990256825	8.009515252	7.483336246	6.770146124	4.394435358	5.823328006	4.417360186	6.575155288	6.382897713	5.729748617
ENSMUSG00000005883	0	0	0	0	0.022238252	0.023320157	0	0	0	0	0	0
ENSMUSG00000005886	4.594973742	5.76411654	5.887279757	6.396424373	6.020732229	6.232129706	6.235752866	4.957031721	6.386669892	5.574809229	4.746893914	5.712727659
ENSMUSG00000005891	0	0	0	0	0	0	0	0	0	0	0	0
ENSMUSG00000005892	0.143081	0.055584	0.117026	0.251913	0.064729	0	0.112299	0.227594	0	0.121924	0	0.280544
ENSMUSG00000005893	7.263635581	8.099694022	8.535087214	8.160694621	7.110325923	7.365666237	9.137336615	7.909502079	9.462595169	8.932869737	7.561367477	8.270686965
ENSMUSG00000005897	1.416819605	1.398689209	1.680348207	1.303050031	1.710114403	1.458745554	1.300536152	1.431014853	1.47239761	1.406017553	1.105911669	1.221940399
ENSMUSG00000005899	4.457052218	3.767125024	4.568511802	4.120352606	3.673917236	4.007817299	5.398006801	5.742920947	5.754081633	6.78484877	6.857964967	6.713189046
ENSMUSG00000005907	1.580738946	1.547408029	1.458009903	1.423087413	1.421148182	1.457360163	1.601259334	1.502900908	1.718805797	1.265822091	1.302472172	1.655021269
ENSMUSG00000005917	0.741666169	0.681220326	0.473466352	0.603465406	0.572836305	0.557818986	0.882702704	0.850990544	0.858182332	1.110750448	0.944333466	1.3347734
ENSMUSG00000005936	13.01997368	10.05241911	15.05213509	14.08073169	14.46011091	13.99716133	22.09702975	23.74759602	23.4170093	23.65231998	21.89377863	14.52989658
ENSMUSG00000005947	0.122923332	0	0.050558267	0	0.018432666	0.019960259	0.050777334	0	0.103593415	0	0	0.023949625
ENSMUSG00000005949	3.295450002	2.902374438	3.270578384	3.690189925	3.63428622	2.904701178	2.442108617	2.827404683	2.87933341	2.400832902	3.190143618	2.362504653
ENSMUSG00000005950	0.476357	0.893567	0.786548	0.840126	0.649007	1.153755	0.705346	0.391389	0.650378	0.511016	0.392925	0.867393
ENSMUSG00000005951	1.019422529	1.689287156	1.632279735	1.423925041	1.209105978	1.213344796	1.054110971	0.851123401	1.306941974	1.234912306	0.597827296	1.034009077
ENSMUSG00000005952	0.057639187	0.020968586	0.021926393	0	0	0.074274356	0.084800194	0	0	0.025187869	0	0
ENSMUSG00000005958	1.954359066	1.76618113	2.674618126	2.192131129	2.052087717	2.27214632	3.952722079	3.344484555	3.488083388	4.764777882	4.214343538	4.111967791
ENSMUSG00000005968	1.093471087	1.15310539	0.626589238	1.590639103	0.963183748	1.769128788	1.535009862	1.55116285	0.904419313	1.625134662	1.479261628	1.778864843
ENSMUSG00000005973	4.18839175	5.77497616	4.017687189	5.781520841	4.967645727	4.857478258	17.0390302	16.64283511	14.79470635	15.16837782	14.67350049	15.50336014
ENSMUSG00000005980	1.099839291	1.657211141	1.801072936	1.671850254	1.930834331	1.692023589	0.952017004	1.324370965	1.332080795	1.148954269	0.491606267	1.295476245
ENSMUSG00000005981	25.30898846	25.60485267	23.31170021	23.36737452	25.15708984	25.45786872	23.64024457	21.60110884	23.55630628	26.34326007	21.47411747	21.85850872
ENSMUSG00000005982	7.823399373	9.078239044	7.670387185	9.175623756	8.499095039	8.470297085	10.64407319	14.84640224	9.755046009	9.423360419	10.9861668	9.929873095
ENSMUSG00000005983	5.249291981	4.845199222	4.866218696	4.835256915	5.362237499	3.890130379	5.848955288	5.631541339	4.848774327	4.873008916	5.504774732	5.552836427
ENSMUSG00000005986	15.58346279	13.49716228	15.26296245	15.33528003	13.35117771	12.71931646	22.89036974	25.14730429	23.72032728	19.02987376	21.86791333	21.78815892
ENSMUSG00000005994	0.024924356	0.054223027	0.142224837	0	0.153925262	0.032333182	0	0	0	0.127641867	0	0.080605606
ENSMUSG00000006005	7.440404243	9.437314851	6.984862123	8.079500951	9.245901933	9.317316474	5.433985966	4.9900062	7.340283425	7.265619728	5.202755499	6.268179193
ENSMUSG00000006007	0	0	0	0	0	0.013647616	0	0	0	0	0	0
ENSMUSG00000006010	3.39750793	4.124665658	7.23649092	8.052226907	8.020356184	7.257156547	3.017663813	3.194930761	4.81204378	4.775725964	3.489909646	3.991775422
ENSMUSG00000006014	0.130154968	0.237537746	0.267917598	0.590182959	0.29313902	0.235149271	0.221616238	0.05904753	0.142797552	0.031362931	0.076720056	0.132835279
ENSMUSG00000006019	2.201784461	2.510517879	2.012844355	1.898214836	2.049651555	1.728572383	2.331261694	2.302391629	2.625956728	2.747817118	2.539081028	2.9102181
ENSMUSG00000006021	3.783044023	3.836318316	3.45619623	3.320527588	3.386875999	3.987784725	4.164240179	4.080103048	3.857794148	3.741647753	3.182827887	3.424432962
ENSMUSG00000006024	56.79875897	48.87780028	61.85794365	57.95944563	59.87533944	54.41299128	34.18466893	31.69946693	35.29016633	33.4596193	35.47971553	31.91137369
ENSMUSG00000006050	9.704084731	7.574477175	9.330313294	9.161644041	7.549375382	10.11848266	6.765928045	6.809781175	6.454163192	6.088012655	5.273336257	6.698947367
ENSMUSG00000006056	0	0.046182	0.074271	0	0	0	0.048262	0.065114	0	0.057196	0	0
ENSMUSG00000006057	23.74571568	23.42174445	20.52533774	20.70842856	21.62862507	21.41229323	22.59872495	22.12971795	20.04076333	20.22002333	23.53224307	20.9029663
ENSMUSG00000006058	14.07550385	11.35283499	14.11330908	10.37561929	12.2449943	12.63127537	9.837925453	11.1808382	10.09331407	10.12072957	10.1127084	10.99384181
ENSMUSG00000006095	36.38836906	33.56195996	38.54159888	38.65845179	32.46555599	37.03971951	59.13018377	64.97288176	64.14909335	60.94546287	63.77405108	78.97499979
ENSMUSG00000006127	3.748940977	2.959673504	3.772283223	3.624663705	3.122476504	3.55171832	3.896607376	3.515757628	3.854561111	4.63574083	4.009917445	6.550383216
ENSMUSG00000006134	8.990837	10.388421	10.032242	12.977455	12.554688	13.680251	13.70743	12.101826	14.832643	15.120805	12.980417	14.882063
ENSMUSG00000006143	0	0	0.060699953	0	0.065773669	0.210059068	0	0	0	0	0	0
ENSMUSG00000006154	1.009601775	1.490573926	0.46245342	0.758481242	1.594674677	1.208672867	1.875919474	0.684234726	0.893640619	0.781169001	0.534536098	0.635300054
ENSMUSG00000006169	8.092186546	8.703844682	9.083641064	10.49202943	9.542495519	9.639614576	7.783866569	7.652943903	8.202027421	7.442505177	7.813858187	8.086860685
ENSMUSG00000006179	0.152165256	0.055171709	0.069461271	0.020872022	0.084248314	0.065578851	0.009140274	0	0.016667119	0	0.030252944	0
ENSMUSG00000006191	0.761568372	0.720468337	0.727427845	0.639911476	0.702939748	0.739057289	0.579594928	0.590139304	0.640613261	0.609446296	0.484957817	0.595057813
ENSMUSG00000006200	0	0	0	0	0	0	0	0	0	0	0	0
ENSMUSG00000006204	0	0.048923964	0	0.049601751	0	0	0.009126477	0.008301265	0.004012015	0.021451811	0	0
ENSMUSG00000006205	33.9176561	32.81616629	33.6517411	53.75176761	56.15525026	53.60664443	26.88772521	24.88993147	29.2160541	29.91343139	28.48576869	24.44705724
ENSMUSG00000006215	6.89989252	5.599288554	6.891312202	6.660591227	5.961862086	5.911939271	5.195487461	4.497814036	4.84877174	5.01596982	5.13319915	5.552347524
ENSMUSG00000006216	0	0	0	0	0	0	0	0	0	0	0	0
ENSMUSG00000006218	1.75878	1.99436	1.915579	1.517065	1.106948	1.509305	11.43082	15.133533	10.36706	9.012962	13.026787	14.03926
ENSMUSG00000006219	0.407875348	0.361387393	0.249683718	0.28325412	0.170648232	0.265816301	1.661613293	2.568728739	1.649279705	1.365585521	1.728569195	2.054939831
ENSMUSG00000006221	0.089393	0.05575	0.087738	0.125806	0.032353	0	0.028253	0	0.124045	0.100115	0	0
ENSMUSG00000006235	2.433526368	1.596677053	1.281547597	1.384105338	1.599117208	1.994737929	0.577813331	0.422508969	0.528166288	0.605200944	0.842629204	0.317358006
ENSMUSG00000006241	1.481456301	1.719529158	2.328515727	1.618009056	1.379608935	1.270504008	0.941361246	1.022458305	0.766176643	1.513299873	0.952244344	0.960570617
ENSMUSG00000006262	1.782101745	2.438130659	1.70475905	2.212159307	2.15453335	2.020439008	1.600569592	1.440682743	1.953100022	2.427863009	1.775334907	1.946593379
ENSMUSG00000006269	0.031266258	0.052624259	0.018484704	0	0.020242532	0	0.059479762	0.143496141	0.116157058	0.142262272	0.112089914	0.035462655
ENSMUSG00000006270	0.136986446	0.154275534	0	0.463242521	0.105689812	0.203760387	0.259416709	0.429254106	0.136332193	0.552530224	0.422389128	0.473272211
ENSMUSG00000006273	121.5880392	106.0711424	121.6003804	116.8107154	107.1289994	116.2762169	78.14924228	74.10800639	81.54140563	80.05065723	81.15685182	73.5499147
ENSMUSG00000006276	5.703973333	5.447743466	5.606440742	5.513348643	5.773262962	5.376923323	6.00307124	5.411130767	5.946829886	5.27227017	4.540998085	5.237955988
ENSMUSG00000006281	0.403470892	0.508201142	0.292679561	0.412852776	0.379094252	0.336241691	0.38347896	0.321375235	0.448655277	0.416875732	0.339512062	0.23668316
ENSMUSG00000006288	9.306655755	8.06701307	8.309013028	6.550427408	7.232334519	7.433552591	10.20829949	10.12429336	9.442775147	9.601827829	8.600933808	8.129768159
ENSMUSG00000006289	3.520856558	4.260720168	4.617262721	2.548807934	3.900523699	3.997656571	4.688649745	4.88771573	4.951507166	5.446936545	4.830406773	4.41161831
ENSMUSG00000006299	39.89495323	38.04281802	38.5869246	35.47405968	36.99211502	37.065127	29.04747235	36.79586752	35.08498535	33.44477971	35.06280512	35.59149763
ENSMUSG00000006301	2.774997654	2.774833439	2.185781761	1.790360874	2.462590971	2.778391867	0.602070258	0.496846985	0.651946871	0.549331959	0.611050657	0.611090613
ENSMUSG00000006304	129.8599705	126.4981512	149.9379828	120.5863155	134.9699246	134.0916306	114.5955358	113.9944044	109.6305718	114.5215121	110.6969847	116.0818531
ENSMUSG00000006307	4.05115016	4.435953125	5.131405759	5.095850225	5.544858376	4.288534845	6.261268892	5.395005539	6.094023398	6.971936178	7.030546168	7.78829864
ENSMUSG00000006310	0.352758846	0.157298738	0.217864118	0.228395132	0.063274194	0.055993456	0.149252121	0.177246213	0.06132448	0.07513514	0.129931205	0.082091303
ENSMUSG00000006311	0	0	0	0	0	0	0	0	0	0	0	0
ENSMUSG00000006313	0.09954	0	0	0	0	0.063705	0.082582	0.14771	0.239436	0	0	0
ENSMUSG00000006315	35.70492701	32.22638396	33.31105617	32.97170379	30.373027	33.73372543	43.24138489	45.80054931	35.39437187	40.13691783	35.7622643	35.56214985
ENSMUSG00000006333	63.18946621	56.2734359	57.04326233	45.78205548	48.84561856	54.1337595	82.91497162	88.28279252	82.20520558	84.52966787	83.45797531	84.43977114
ENSMUSG00000006335	9.095696199	6.427786324	13.53542746	7.503384378	10.9364742	12.1383169	10.56360626	7.189383771	9.377958796	10.8003096	5.83512788	10.71359726
ENSMUSG00000006342	0.681089552	0.793570803	1.086834875	0.772191024	0.587498431	0.893114414	0.374784658	0.263609426	0.750383106	0.574316763	0.382604115	0.380798982
ENSMUSG00000006344	0.620617198	0.425613087	0.233034555	0.23431383	0.486098454	0.453274718	0.294925768	0.239872244	0.497382438	0.3815596	0.183069362	0.150327163
ENSMUSG00000006345	0.457068214	0.531540375	0.377252105	0.24683508	0.471956347	0.459812655	0.148774619	0.142685846	0.228581564	0.325269861	0.182742075	0.136413125
ENSMUSG00000006356	9.929782966	17.35928885	13.25882278	11.36667851	15.41587248	11.11758878	33.3891923	39.15190708	39.75612364	27.45951806	35.43992192	31.24960161
ENSMUSG00000006360	1.884898995	1.634354461	1.353989583	0.862352176	1.319729098	1.270617702	0.882173531	1.22943855	0.637593718	1.086320763	1.11014229	0.685959579
ENSMUSG00000006362	2.742624851	2.923901336	3.503103968	6.026036549	4.175257384	3.858039655	2.944927735	2.974149817	3.19608786	2.825233083	3.110177357	3.002879542
ENSMUSG00000006369	3.40791695	3.796037305	1.98141746	3.384694838	3.275460685	2.832345664	5.418318657	5.538985017	4.989347356	4.746609208	7.444177813	5.537041319
ENSMUSG00000006373	143.487869	147.108017	126.861839	137.317429	125.283142	136.425018	133.019043	128.862411	135.577042	131.707901	137.494965	136.287277
ENSMUSG00000006378	3.710288683	3.45013943	3.378219274	3.938721292	3.155274249	3.770321061	4.434644786	5.540703108	4.108057991	5.341380541	5.038761166	5.517333159
ENSMUSG00000006386	3.529815372	4.060538008	4.225103236	2.942125434	3.2002171	2.551598031	4.029095406	3.627468244	4.528386353	2.629683034	2.550174169	3.083045212
ENSMUSG00000006389	0.022416504	0.09761339	0	0.027672595	0	0	0	0.002180234	0	0	0	0
ENSMUSG00000006390	7.449197775	7.276336306	5.829694629	4.137205609	7.887525667	7.347578839	2.908553936	3.069614471	2.530967261	3.02509987	4.118595533	2.964430913
ENSMUSG00000006392	4.864187039	5.240794816	5.16996757	5.375229987	4.769366092	5.106499361	6.568565134	6.973240108	7.396050458	7.677327284	6.838743505	7.462677379
ENSMUSG00000006395	1.862414117	1.878849026	1.405764204	1.41174487	1.617743586	1.536265787	0.749941315	1.4275165	1.416991645	0.992490391	1.733635886	1.560916203
ENSMUSG00000006398	0.635434036	0.471250746	0.332877639	0.317509777	0.472136306	0.09675865	4.570835624	4.931368637	5.488923295	5.607866603	3.672106486	5.377199294
ENSMUSG00000006403	8.000864485	10.11374288	6.063754695	4.858908187	9.111605034	7.094989348	1.004248801	0.864032592	1.253989045	1.577511804	0.892124589	0.791745488
ENSMUSG00000006411	1.815690513	1.189166127	1.764305423	2.172119261	1.584999956	1.585655221	0.426736917	0.454119511	0.513060372	0.882108953	0.56593282	0.663989046
ENSMUSG00000006412	35.8590856	37.43867494	39.39554407	37.61625592	37.12723322	38.37284854	28.95344999	29.63873406	29.40549222	30.25740963	26.52899123	32.74499138
ENSMUSG00000006418	16.14615617	15.39082752	16.1360606	16.31959497	16.41717788	17.6893993	10.77752013	12.05442155	10.87706217	11.26888775	11.34486333	12.44924423
ENSMUSG00000006423	5.282729345	6.826307209	5.643533932	6.440411577	5.939712765	5.538550847	3.4895435	3.669220272	4.394911226	4.147609524	3.931986675	4.0604951
ENSMUSG00000006435	45.6539448	41.02201905	50.7751256	45.60576846	43.74977705	44.60955203	31.70833391	27.55276564	29.83286584	30.67703245	30.21959021	23.46114768
ENSMUSG00000006442	26.6528418	23.41313409	27.94541622	21.76344635	20.35697822	24.46208588	35.53955099	39.55844288	33.71419188	35.00578619	37.43579977	39.91925235
ENSMUSG00000006445	0.224445795	0.341340164	0.385571147	0.350238616	0.45840368	0.408742737	0.395699404	0.408968777	0.541907804	0.662404432	0.441708549	0.632602504
ENSMUSG00000006456	3.908653597	4.607383625	5.515933853	7.833174186	5.743056619	6.258664782	9.401818813	11.00195966	9.031965793	6.854557991	8.353709647	9.504347611
ENSMUSG00000006457	0.252146289	0.153267947	0.390826151	0.4105234	0.340876486	0.266596047	0.83089639	0.598221977	0.576009952	0.396832951	0.877836738	0.505740539
ENSMUSG00000006462	0.016166673	0.051638075	0.093782295	0.074415568	0.014628703	0.005623702	0	0	0	0	0	0
ENSMUSG00000006463	6.221682859	2.515448817	5.420694701	3.021198092	3.572039415	6.956149298	5.804246809	4.887070811	2.470560753	3.504717413	4.279509223	2.559773
ENSMUSG00000006464	7.574814	8.359812	8.33079	9.446101	8.294344	8.860456	8.039051	6.816221	6.754397	6.296924	6.703859	6.397732
ENSMUSG00000006469	0.084578752	0.046154064	0	0	0	0.038648728	0.023576955	0	0	0.039319922	0	0.055321182
ENSMUSG00000006471	1.97633751	1.828804535	1.385509987	3.131000613	1.691598388	1.651238827	2.578186932	2.295914919	1.650463225	1.438618112	1.52184656	1.415953056
ENSMUSG00000006476	82.45402345	77.01555971	89.92406551	94.59329814	93.00622106	80.19646642	84.35149331	68.31331795	113.4145895	114.3612009	110.2558114	101.4331181
ENSMUSG00000006488	0	0	0	0	0	0	0	0	0	0	0	0
ENSMUSG00000006490	0	0	0	0	0	0	0	0	0	0	0	0
ENSMUSG00000006494	5.835333001	6.90566076	5.857960436	5.960718453	5.503896086	5.803152073	6.70044875	5.211081176	6.793574971	5.825841908	5.364263504	5.625960142
ENSMUSG00000006498	4.106571732	4.815027809	4.059333465	4.541712108	5.50293497	4.456327381	7.637120678	7.155817342	7.286829293	10.0613428	9.187890274	7.947630894
ENSMUSG00000006517	9.835977543	10.8280297	9.919477751	8.86200775	10.52019978	9.34072131	40.16996507	40.6174301	38.95073242	46.29987674	49.98831742	48.08323407
ENSMUSG00000006519	4.757751107	5.777760383	4.981817677	3.843261967	4.485297448	3.377989143	4.654808431	4.213047361	4.976483526	4.694669157	3.685315565	3.414968402
ENSMUSG00000006522	3.055830659	2.953665353	3.407107974	3.093335921	3.196453945	2.696253089	1.300565174	0.918979198	0.891278422	0.96412986	1.079335563	1.113274389
ENSMUSG00000006526	3.628377526	4.346768189	4.461233924	4.918071166	4.802293611	3.974143369	3.26927081	3.677692565	3.755825914	3.905861415	4.329548235	3.910333297
ENSMUSG00000006527	3.116652237	3.598707236	3.452804593	3.712365351	3.73296765	3.156417653	2.674278429	2.371196288	2.297556918	2.925137436	2.630687808	2.72143468
ENSMUSG00000006529	0	0	0	0	0	0	0	0	0	0	0	0
ENSMUSG00000006538	0.023203087	0.025238701	0	0.085837493	0.02899981	0.08912978	0	0.070036787	0	0	0	0
ENSMUSG00000006542	0	0	0	0	0	0	0	0	0	0	0	0
ENSMUSG00000006546	0.088922716	0.194095417	0	0	0	0.076646505	0	0	0	0	0	0
ENSMUSG00000006567	0.334969	0.503924	0.324813	0.320499	0.303285	0.391367	0.635932	0.625434	0.417309	0.568656	0.475029	0.284672
ENSMUSG00000006570	0	0	0	0	0	0	0	0	0	0.288786	0	0
ENSMUSG00000006574	0	0.031562242	0	0.034690124	0.027230042	0	0.03199063	0.087000834	0.242620854	0.2780962	0.161292209	0.178179612
ENSMUSG00000006575	98.21101972	86.64511237	106.9051179	99.91954718	92.06384939	90.54803672	64.38944349	67.34718213	64.38243999	63.93736436	62.45788478	68.04817083
ENSMUSG00000006576	9.073731138	9.34684061	9.970563097	11.16070755	9.923168555	9.734461982	13.90085889	12.62959324	13.21138639	12.5798989	12.48609119	12.12278226
ENSMUSG00000006585	0.4662978	0.3013375	0.249338254	0.215616825	0.599782077	0.125169959	1.276003578	1.595917249	1.198989929	2.166797283	1.250662508	1.636314338
ENSMUSG00000006586	1.624908522	1.098668872	1.067757327	2.217513379	1.957334253	1.402762912	3.081883373	2.844319802	3.460723699	4.575397493	5.986975472	3.908889639
ENSMUSG00000006587	0	0	0	0	0.009538	0	0	0	0.030521	0	0	0
ENSMUSG00000006589	14.12431674	10.54927219	13.0825412	10.08015775	10.32364006	12.27249825	18.54011296	22.14921001	20.49374967	18.24964474	17.27445266	21.55843308
ENSMUSG00000006599	11.58304671	11.56852506	10.56695709	11.52560457	11.38227997	12.26942354	10.28247023	10.60998222	10.71762812	11.13037952	10.6715089	11.91395673
ENSMUSG00000006611	1.960354097	3.452647102	1.344242423	2.753210913	1.847599596	1.801028404	1.077415363	0.850884741	0.807334914	2.059803782	1.260222943	0.943456241
ENSMUSG00000006638	2.361323817	3.334847286	3.118143251	2.487247505	3.121780217	2.589740538	2.920883765	2.844405131	3.719025425	4.007671156	2.892634405	3.956916556
ENSMUSG00000006641	4.021038149	7.132421325	3.338767319	5.169994614	3.541150694	5.102741351	3.380105268	3.232608306	3.596701679	4.223134825	3.819441422	3.330233704
ENSMUSG00000006642	0.051318	0.018752	0.03935	0.122604	0.148293	0.19757	0.019007	0.083848	0.067754	0.066526	0.018644	0.089634
ENSMUSG00000006649	2.635381699	2.460805241	2.629365435	1.858200076	1.722807247	2.214958842	3.492188818	4.267820088	3.383308835	3.671238368	3.204967368	3.323985366
ENSMUSG00000006651	394.6823763	355.0013338	380.0889922	380.0434304	391.1458089	378.6516497	264.6477271	268.3731932	257.7125962	253.4829868	264.4038351	261.4276589
ENSMUSG00000006673	7.233670611	4.807364737	6.085607793	6.779672829	5.636478693	6.579971289	7.361996632	6.979576265	6.480888424	7.739774352	8.447239551	8.473822516
ENSMUSG00000006675	16.976803	15.66702095	19.05038863	18.60441028	17.73690023	17.67139039	6.797730403	5.906487842	7.294161782	7.023905025	6.923483154	6.652234738
ENSMUSG00000006676	11.54323988	11.79259606	10.98049351	11.6926426	10.89586742	12.15334454	9.349766969	8.44917671	8.925249407	8.013022987	8.016727834	8.334099438
ENSMUSG00000006678	0.683526728	0.588434308	0.429358921	0.411957673	0.515494162	0.4754725	0.711616689	0.587109452	0.853810463	0.538640028	0.521523966	0.618646266
ENSMUSG00000006699	93.36518956	89.94691804	85.89961375	82.35966576	82.63599978	85.94995239	134.522192	140.567908	143.9243611	141.0333599	144.4489493	146.065682
ENSMUSG00000006705	1.846326116	2.064005391	1.50954413	1.8957315	1.67286898	2.216541159	2.782694813	2.933361334	3.3309947	2.42942042	2.418187585	3.171567535
ENSMUSG00000006711	3.763708836	4.980289881	5.609241435	5.154905667	5.096989277	5.447591894	6.229265036	4.904596743	6.026433237	5.812299259	4.674181705	4.692894952
ENSMUSG00000006715	0.783012195	0.579021991	0.865911418	0.680382178	0.593158042	0.918758094	1.422127311	1.151994508	1.099000636	1.499691403	0.756554696	0.965833644
ENSMUSG00000006717	71.41552099	57.59647592	67.88060775	53.4550596	57.49710731	64.03549896	30.21913789	31.40386251	34.50729042	32.19204022	28.98908626	33.41313812
ENSMUSG00000006720	0.489806166	0.443663322	0.191870394	0.607460143	0.693883826	0.204325258	0.529420292	0.900403664	0.922189931	0.959221618	0.847145806	1.754637799
ENSMUSG00000006724	0.038022153	0.089294782	0.047507523	0	0.034413651	0.071048211	0	0.055289247	0.017224331	0.0923025	0.11871898	0.099069629
ENSMUSG00000006728	15.86892581	13.16669402	13.52732779	14.761396	12.98603186	12.92536895	24.42884352	25.61357318	22.92410793	22.2128027	21.63425983	24.67342419
ENSMUSG00000006731	30.42360895	27.30288776	37.32775645	31.01408728	30.70572677	29.62740681	30.40338466	31.61375941	30.64712327	31.9332585	30.6127004	30.59908685
ENSMUSG00000006732	3.472159648	3.020355638	3.3456096	3.02424644	2.800552752	3.098605532	2.974053422	2.476642606	3.757825828	3.69518482	3.309456194	3.099220684
ENSMUSG00000006736	22.91095017	21.82587217	19.93220642	21.1146655	21.63928612	18.42966003	20.21422789	20.8479312	20.70439808	21.88701547	20.77959672	19.4796762
ENSMUSG00000006740	22.7551555	31.5661643	24.64496031	26.08515728	30.21128088	28.05730122	13.02291246	11.26177895	17.79317745	16.41223632	12.72627585	15.31948793
ENSMUSG00000006763	1.144857843	1.233821594	1.211408528	1.339559629	0.974970054	1.09753563	1.748664618	1.608552693	1.85413388	1.821852745	1.736591316	2.250506423
ENSMUSG00000006764	0.468375695	0.306927318	0.455213771	0.281825713	0.330848636	0.368032213	0.334415947	0.305324719	0.332005207	0.159589472	0.23607366	0.410495152
ENSMUSG00000006777	0.390229	0.787201	0	0.096636	0.05316	0.083356	0.067934	0	0.064608	0.039002	0.145225	0.072562
ENSMUSG00000006782	149.1571602	151.5759295	110.8527262	63.76654767	133.557895	127.1125535	12.93430354	14.05333523	13.92788035	16.6432237	12.99744813	11.61002582
ENSMUSG00000006784	0.410915072	0.435746246	0.122959954	0.084840865	0.238281776	0.254864317	0.28334504	0.212765743	0.116935313	0.247340306	0.181166928	0.234726296
ENSMUSG00000006800	25.27767978	23.94430407	23.08312157	24.71781471	24.33574794	25.52250793	48.40397868	44.53272179	48.9287745	46.55273493	47.36020475	45.58257013
ENSMUSG00000006818	32.090286	37.273468	35.066727	38.175789	33.815971	38.808376	33.726196	29.488321	32.331448	34.136623	32.464832	31.204416
ENSMUSG00000006850	3.93816	3.998248	4.337321	3.022444	3.795088	2.716327	3.78419	3.518178	3.020885	3.265367	3.157214	2.719437
ENSMUSG00000006906	2.187485872	2.385634746	2.050011656	2.506820917	1.956696897	2.394265562	2.748478374	3.156276826	3.142720852	3.392027482	2.611537856	3.094308381
ENSMUSG00000006920	8.798374355	8.696310821	8.856056933	9.867149395	10.4175603	9.778157836	4.350852306	3.646014238	4.352930051	3.55738884	3.498543633	3.665913224
ENSMUSG00000006930	21.43857947	24.11883698	17.32303886	30.24302777	20.36059315	20.49838742	21.95663724	17.83213466	19.29278005	19.61626594	22.10147411	23.83826132
ENSMUSG00000006931	6.394512	7.498937	5.517234	5.810205	5.596679	6.445925	4.976769	5.418089	4.974256	7.789291	6.749701	5.650361
ENSMUSG00000006932	89.77023774	91.83783655	85.45648113	84.72837738	90.53687836	98.34958023	138.2241605	131.8901603	158.715497	163.1267533	135.8397349	129.4750666
ENSMUSG00000006941	83.09107302	75.96027399	80.83602753	79.11053305	78.26209413	74.9656098	86.80310432	88.53783209	91.16915905	84.57122104	82.05376032	88.05826748
ENSMUSG00000006948	0	0	0	0	0.071247	0	0	0	0	0.074232	0.21155	0
ENSMUSG00000006958	6.008963219	5.443124648	6.274760676	5.144172328	4.63832027	5.244895286	1.262971867	1.17191717	1.653520219	1.232947262	1.352768128	1.190765776
ENSMUSG00000006998	43.09962925	43.28012808	41.94269557	38.29705857	40.59926597	42.98391776	58.93274105	57.0442507	59.36567128	64.44147032	58.41000781	60.00680167
ENSMUSG00000007021	76.53880125	63.62141129	74.14585908	75.62553272	71.62788682	75.94256759	99.96143866	98.1542899	100.0062252	92.0153776	95.85009026	91.48179165
ENSMUSG00000007029	5.040867061	4.835278221	5.45944787	4.753359169	5.260401374	5.28914369	7.270355726	6.696071545	6.541113447	6.71248854	5.953107307	6.506736012
ENSMUSG00000007030	0.00598	0.06031	0.018463	0.020243	0	0.031801	0	0.029042	0.056577	0.06449	0.017793	0
ENSMUSG00000007033	3.105673	3.207943	3.976599	2.74421	3.423229	3.371378	2.058214	2.218294	2.058493	2.178863	1.502505	2.52896
ENSMUSG00000007034	0	0.011470975	0.071881833	0.021778655	0.028690691	0.028304889	0	0	0.044283756	0	0.024659576	0
ENSMUSG00000007035	0.040868814	0.006958571	0.025890289	0.061046992	0	0	0.084188152	0.025710782	0.012616433	0.06876511	0.013499858	0.014080916
ENSMUSG00000007036	18.71167817	18.7082969	18.80239431	18.92937969	18.13599034	18.68408096	13.62651989	12.62619764	12.62024564	13.93832816	14.29190172	12.89545346
ENSMUSG00000007038	11.27947016	11.69207237	12.05923973	11.3920427	10.61454116	11.31612678	5.641648435	6.314973807	5.430444998	5.906394326	6.214370137	6.016737339
ENSMUSG00000007039	10.05764876	9.403631434	8.209715194	6.39158164	8.104849844	8.2813315	35.08042434	37.6552091	34.20332784	36.35904143	33.92616723	37.83892241
ENSMUSG00000007041	5.915403102	6.030813321	4.762070875	5.435803973	6.020652544	4.839976485	8.404059607	8.375114948	8.931399992	10.16099324	8.055581518	9.932175753
ENSMUSG00000007050	2.143698652	2.460501109	2.333698411	2.055342979	2.443052944	2.359231819	3.98225006	4.170065381	3.610333524	3.494315135	3.953373819	3.84443844
ENSMUSG00000007080	0.124753787	0.147713657	0.109838903	0.069757094	0.133985709	0.129387584	0.61832604	0.668972034	0.600896477	0.612202622	0.476183286	0.530562034
ENSMUSG00000007097	106.0351113	122.4695339	111.64013	112.51347	118.1609418	111.9821756	76.21837151	64.5088015	79.66950358	64.7108957	60.7489778	58.90738891
ENSMUSG00000007107	0	0.053288677	0	0	0	0	0	0.113672544	0	0	0	0.021007363
ENSMUSG00000007122	0.24126767	0.231304453	0.268003701	0.238616117	0.13760008	0.436807178	0.400453457	0.686864446	0.27086939	0.285132256	0.277880949	0.337935678
ENSMUSG00000007207	37.14449938	32.33116911	43.0807679	44.85131506	33.53461885	35.76091757	73.96221797	68.88290979	69.86119276	68.15873498	72.93725065	70.7455599
ENSMUSG00000007209	0	0.054156094	0	0	0	0.098323515	0	0	0	0.19318127	0	0.055145463
ENSMUSG00000007216	1.212106725	2.027261022	1.914742103	1.333966147	1.624889026	0.992070177	1.718087934	1.315451014	1.328347451	1.753610425	1.74489058	1.898299016
ENSMUSG00000007279	0.119226652	0.14946739	0.097042978	0.188293512	0.075499177	0.107719004	0.296564972	0.370591121	0.479651595	0.432329791	0.359054463	0.431203691
ENSMUSG00000007338	21.827963	20.087025	20.915764	21.658947	18.355175	19.333536	18.111641	16.776012	18.394802	18.323599	16.911573	19.13162
ENSMUSG00000007379	0.065450109	0.111422578	0.110789647	0.012730645	0.153924282	0.052313966	0.358309994	0.172834754	0.283326398	0.202770903	0.270083524	0.216442609
ENSMUSG00000007411	6.239257231	5.823227005	6.318134671	6.182289331	6.498281641	6.29021975	10.96558587	11.17911096	11.33866235	12.16134188	10.96882422	11.94054615
ENSMUSG00000007415	9.345868771	11.98195398	11.82640369	13.40665059	10.94368289	8.993436274	11.07697953	14.57612058	13.88436154	11.4928561	14.30743518	10.88954888
ENSMUSG00000007440	0.522253	0.500574	0.35324	0.329093	0.626396	0.608358	0.788921	0.974313	1.424933	0.987098	0.808505	1.126523
ENSMUSG00000007457	0	0	0	0	0	0	0	0.00148	0	0	0	0.014724
ENSMUSG00000007458	14.22561263	18.42727683	17.2201172	16.26259043	15.93182483	16.62818158	9.268910133	9.509451652	10.72407309	11.88992164	8.743950332	9.154859933
ENSMUSG00000007476	7.317065509	8.161027314	6.936265308	9.627455682	10.23422441	9.557860209	9.583981827	9.862090185	10.26052024	8.745003181	9.205305604	8.243065434
ENSMUSG00000007480	0.286868	0.199415	0.208844	0.180272	0.153935	0.206957	1.730276	1.493567	1.621568	1.69739	1.109486	0.924305
ENSMUSG00000007564	165.5595603	145.2313948	167.0406574	151.4587761	151.0204148	150.988915	204.4386697	211.3533623	206.4176968	201.8850782	211.745436	198.6985919
ENSMUSG00000007570	3.134068986	2.885096701	2.871028336	3.175293844	3.115931809	2.757058419	3.035238696	3.655240554	3.42958416	3.467127948	3.272469942	3.284909577
ENSMUSG00000007589	1.365725343	1.346120251	1.598070018	1.538495726	1.733748496	1.896669169	1.478005114	1.308911839	2.142124208	1.523606736	1.464602804	2.596754534
ENSMUSG00000007591	0.041189658	0.150380006	0	0	0.187873621	0	0.150921058	0.062643197	0.0406054	0.102240827	0.234365939	0.188219266
ENSMUSG00000007594	28.4102946	24.4872718	33.63579601	29.89959501	29.9707213	27.67852562	0.703974752	0.59509255	0.7066853	0.724423207	0.637137661	0.602200367
ENSMUSG00000007603	18.870319	16.824991	18.603565	17.790668	15.616042	15.615578	15.283874	17.792122	18.873829	14.554745	15.442598	18.636143
ENSMUSG00000007610	3.236541857	3.970338914	4.407157102	3.238707236	3.835039666	3.969054724	3.57375804	3.04761904	3.456707747	2.688269988	2.383417587	2.132152208
ENSMUSG00000007613	2.873802742	3.861559015	4.31283639	4.022145481	4.580704818	3.969723417	4.78402639	3.826621083	4.856368602	4.984101822	4.195222813	4.551322609
ENSMUSG00000007617	6.137480396	8.157514187	7.814183299	10.25354313	10.84842153	12.17066608	5.71906914	5.156154819	5.997594582	6.270606546	4.544392869	5.502606679
ENSMUSG00000007646	0.635943766	0.533466484	0.907258279	0.69310852	0.655677405	0.700252522	0.827058779	0.876967595	0.740159181	0.56694977	0.860255312	0.78764994
ENSMUSG00000007653	7.86260335	13.82675633	11.03856039	12.06407736	12.69252561	13.08781117	8.065222584	6.05303609	10.49067119	7.606960442	6.305585452	7.713356741
ENSMUSG00000007655	2.422211497	1.637990722	2.189951741	3.152227717	2.939246453	1.615328259	5.467790515	6.678317301	5.770809506	6.018839286	1.353843206	3.988863384
ENSMUSG00000007656	9.22383842	9.370872633	11.22400979	10.72824603	10.73547755	11.60984052	15.04059457	9.692600001	15.72984899	13.96826526	17.91792289	5.625011701
ENSMUSG00000007659	19.4643605	8.058598538	21.5513322	21.5902823	21.7321009	17.9514608	17.83291071	17.62631407	17.98543677	18.15588428	17.83168167	16.35545523
ENSMUSG00000007670	19.234919	17.164875	20.086079	19.433849	18.48053	19.427061	21.547392	21.417145	19.465305	20.033512	18.639223	19.754797
ENSMUSG00000007682	6.130746	7.391435	7.079125	13.324877	15.704712	13.640831	6.069862	4.998627	7.589361	6.902825	5.109585	6.648737
ENSMUSG00000007721	50.20641518	45.64935322	50.48595861	48.06280146	44.97924218	46.60571039	52.05649231	54.33990427	50.7456632	46.64729407	52.32784802	54.15199464
ENSMUSG00000007739	16.22748133	14.822913	17.11087188	14.47151363	14.7941095	15.97066715	24.8808689	25.28935897	24.98190467	23.78988594	23.32323767	25.59371543
ENSMUSG00000007777	12.16594541	11.97404485	13.7702097	11.96642236	11.6700178	11.85834876	11.0847947	10.47050573	9.521926873	11.33649397	9.7948673	10.47399142
ENSMUSG00000007783	17.1999678	15.41736342	17.11606826	18.38805987	16.8921313	15.64863176	9.442823649	9.256788758	9.558499396	10.11009855	9.326572045	8.617814525
ENSMUSG00000007805	0.323175718	0.374440298	0.585496792	0.575534683	0.245823136	0.682286502	0.438980772	0.380521478	0.644668659	0.588832455	0.395866727	0.377474116
ENSMUSG00000007812	4.110521186	4.538406519	3.850895704	4.614262016	4.714640766	5.23657789	3.10679263	2.685059565	3.65466521	3.431526122	3.528061931	3.822223873
ENSMUSG00000007815	19.66618249	19.69920122	19.38446018	19.63533029	19.71919584	21.13735987	25.48808263	24.67575492	25.49969761	26.09523925	26.21869497	25.83678793
ENSMUSG00000007817	8.724658804	9.994458679	10.14852244	10.92477491	9.932380498	9.968790675	16.93187404	17.14140313	17.99246049	15.94510373	14.72838631	17.15634726
ENSMUSG00000007827	1.579198634	2.093980706	1.456165871	1.67076586	2.00048999	1.823576577	0.977303559	0.968819335	1.294828914	0.899178673	0.660814436	0.977844358
ENSMUSG00000007833	1.036047802	1.04760467	1.019178908	0.836622687	0.937807413	0.776957613	1.195900033	1.416059217	1.15091995	1.012187742	1.048738351	1.315906415
ENSMUSG00000007836	47.54464	45.407063	53.112255	52.757088	46.677654	51.183773	81.699821	81.935616	75.936913	79.894867	78.31768	87.716187
ENSMUSG00000007837	1.265130671	2.19910821	1.737792768	1.048612495	1.26576508	1.928839379	1.9721658	1.278513527	0.916429963	1.513944803	1.475581248	1.195355525
ENSMUSG00000007850	14.25711018	15.67550147	16.21339174	15.02618883	17.02408305	15.95649714	20.87859009	23.57347388	24.04728295	21.64963363	21.55121055	23.67796647
ENSMUSG00000007867	3.363472211	3.418082603	2.110310064	3.323333669	3.494546537	2.552675124	3.125174184	3.397657305	2.840856415	2.76405301	2.741210787	1.967684977
ENSMUSG00000007872	20.45255083	22.1427553	16.56592105	16.75163231	15.21523562	19.1491576	29.92271214	33.16331693	32.98160351	32.79475609	30.60630145	26.12367207
ENSMUSG00000007877	0.298409	0.889369	0.593698	0.964557	0.660234	0.768743	0.247572	0.445108	0.95287	0.3899	0.565832	0.451158
ENSMUSG00000007880	8.788399513	9.896300629	10.68645513	10.34340585	11.21233019	10.05054909	12.48084086	11.74284158	12.44793091	12.79221005	12.42789773	12.88432461
ENSMUSG00000007888	12.99829413	8.821388721	11.77877934	11.38094014	8.800677967	9.865464531	8.94671612	10.91214515	10.42316133	9.10047839	9.675752536	9.800207866
ENSMUSG00000007891	167.5423574	189.4438176	136.9751563	170.4199594	179.6866223	155.0609954	87.55213032	93.36909631	96.83542819	124.1304562	117.337064	97.77913107
ENSMUSG00000007892	759.327576	735.613098	763.044739	591.182556	656.060242	684.27533	860.018311	942.800598	832.326904	836.663208	857.319763	836.785034
ENSMUSG00000007907	0	0	0	0	0	0	0	0	0	0	0	0
ENSMUSG00000007908	1.675959043	1.82162767	1.726782157	2.273104573	2.159033909	2.536910718	2.760838752	2.710360623	2.917824434	2.376651399	2.498101516	2.547736499
ENSMUSG00000007944	31.278622	29.379717	33.883324	32.914299	30.709141	29.415228	67.030785	69.187859	60.925087	56.789574	65.413666	59.978321
ENSMUSG00000007946	0.006487393	0.072376485	0	0	0	0.033111401	0	0	0	0	0	0
ENSMUSG00000007950	60.33016338	55.15484512	63.84678759	69.44310837	62.81280741	63.51002332	39.88058695	41.89170454	38.87419498	42.38719524	42.84547983	40.63449872
ENSMUSG00000007987	12.83972501	14.06678815	12.49187171	13.86377155	13.56858359	13.51202176	10.3078404	9.750699637	10.67509887	8.227968282	10.03881213	9.331322857
ENSMUSG00000007989	5.151316726	7.366126706	5.741021065	6.909242243	6.769524286	6.18714866	6.7397788	6.071149319	8.272563935	7.959117977	6.652310621	7.34008685
ENSMUSG00000008028	0.383042354	0.445351438	0.523168347	0.650888188	0.508087319	0.510077815	0.633126828	0.387382401	0.347269431	0.341382723	0.346474133	0.468274633
ENSMUSG00000008035	16.31324895	19.45602572	34.73453784	29.87172441	31.25828733	16.36665428	34.91597421	35.85297507	29.6697638	18.22438025	34.73255761	34.19670057
ENSMUSG00000008036	91.76803766	74.69858746	86.57754779	80.13991863	73.07476691	82.34875341	113.3112153	109.8187364	92.5821014	104.283676	112.2187941	89.82273384
ENSMUSG00000008090	3.722355965	3.694479371	3.088950053	3.257416391	2.422198311	3.232048129	3.330831815	3.863246896	3.322268209	3.533075546	3.741339024	3.386673138
ENSMUSG00000008129	0.871643296	0.573579244	1.004543984	0.665993599	0.354713095	0.856549789	0.945474877	0.901237583	0.971405872	0.636086218	0.998633246	0.629320748
ENSMUSG00000008136	15.29362048	15.59494497	16.71709987	10.7927663	12.42969694	12.82651191	11.49385543	9.031128527	11.14224305	10.37253435	11.33858864	8.467945104
ENSMUSG00000008140	76.79381978	69.03620514	76.81307456	69.1982656	69.30673232	75.3346149	61.11920506	66.10729546	59.94710024	57.82258091	61.13062076	60.30366523
ENSMUSG00000008153	43.91218057	56.27992435	63.91189745	68.21140337	64.6512959	66.04309396	63.88449288	57.48886073	62.10631997	57.68401692	60.39811788	58.33595935
ENSMUSG00000008167	3.3271802	2.971349121	3.31653617	2.962339525	3.203726918	3.669483501	12.63897548	11.54138799	12.39230396	9.441111113	8.980239774	12.12402533
ENSMUSG00000008193	0	0.026912755	0.028236763	0	0.046854537	0	0	0	0.024309455	0	0.026757218	0
ENSMUSG00000008200	3.400184662	4.364713405	3.745290855	3.666394851	3.798357715	3.865649747	4.148989655	3.432300769	4.075671101	5.271677245	5.000555733	5.24121377
ENSMUSG00000008206	2.159169035	2.724517873	2.232962275	2.30123382	2.059611629	2.174807564	2.166385907	1.755811437	1.982611129	2.176290752	1.773223318	2.140950007
ENSMUSG00000008226	6.217407752	6.260856737	6.250611843	5.7608986	6.343043394	6.38413909	2.127962651	1.733930438	1.981266005	1.757711203	1.453287807	1.701122966
ENSMUSG00000008301	17.84570996	16.49150347	16.53495075	14.96141326	16.5299696	19.27730996	19.47115274	21.90413575	22.79723404	20.91728567	18.75082408	20.55705404
ENSMUSG00000008305	4.189210661	4.655090345	4.448032059	3.80190661	4.356124416	4.514249473	4.819633592	4.862821054	4.955309796	4.85719891	3.988465367	4.36581895
ENSMUSG00000008307	0.24399678	0.428828046	0.224707153	0.183188478	0.20341924	0.311396845	0.133783985	0.127840648	0.106524328	0.094934223	0.167671124	0.171413242
ENSMUSG00000008318	2.77851653	2.544678172	2.781135828	3.188790249	2.784083948	3.266391209	1.204514216	1.157370998	1.216422809	1.611699516	1.333836022	1.483369594
ENSMUSG00000008333	5.745553807	6.550611567	6.18751444	5.800885666	5.702945822	5.951957112	7.657239453	7.757723719	7.190596611	7.450285091	8.79811758	8.928355939
ENSMUSG00000008348	123.5558592	110.8374671	112.677595	130.6192122	139.2673204	141.538264	132.0870755	160.7701494	139.6452831	136.204558	121.8665379	146.7905669
ENSMUSG00000008373	7.400879644	6.733700711	6.738167484	6.562806767	7.211688056	6.984029058	7.887466204	8.701894061	8.620413135	8.516705353	8.104412108	8.49944172
ENSMUSG00000008384	3.341101567	2.633721609	2.931786214	4.431846705	6.475600406	4.945909781	1.507609467	2.148482317	2.212771708	3.10937096	2.895429864	2.195557056
ENSMUSG00000008393	17.269287	22.120579	18.260653	16.924593	26.187176	21.791607	21.53767	26.255022	22.932262	24.204428	21.800304	27.093414
ENSMUSG00000008398	2.089982211	2.262746958	1.446406595	1.846438892	1.498994329	1.923767013	3.0584178	2.535386525	2.903950579	3.127911197	2.672454446	2.216509334
ENSMUSG00000008429	7.294541615	8.126539017	7.528099522	7.942907071	7.155348612	7.335044053	7.647089695	7.520193419	7.314128137	7.341254187	7.3183095	8.147569907
ENSMUSG00000008435	1.962934079	2.381920157	1.818197467	2.177947812	2.335965579	2.569813892	3.951930719	4.768167895	4.098230077	3.823273892	3.601256965	5.075088836
ENSMUSG00000008438	0.060422	0.039773	0.026408	0.050549	0.11312	0.062823	0.133568	0.072518	0.0479	0.09555	0.149094	0.065933
ENSMUSG00000008450	13.18932772	8.797829783	12.98228846	13.45224473	14.4692176	13.12110966	17.97420761	12.82403742	12.20546048	16.35662032	12.06271766	18.92940537
ENSMUSG00000008461	0	0	0.045151852	0	0	0	0.16839084	0.108548916	0.175172369	0	0.10999542	0
ENSMUSG00000008475	78.35421389	81.86977695	93.47108503	76.85371797	83.54399629	68.26499962	110.3779634	126.4827897	133.6554015	137.3371556	109.9213218	139.7017918
ENSMUSG00000008482	0	0	0	0	0	0	0	0	0	0	0	0
ENSMUSG00000008489	6.99592528	3.606021	3.666645553	4.075628294	3.64359749	6.477974603	4.664182698	4.666010344	9.78099333	8.763935829	7.233036705	9.524266947
ENSMUSG00000008496	0.517616917	0.754809809	0.273255562	0.382228876	0.360226667	0.489316655	0.226585957	0.284856519	0.69284988	0.262449115	0.29284204	0.544610215
ENSMUSG00000008540	3.83255786	5.383166355	2.130826633	2.954630659	4.13844056	4.332257057	2.767486875	3.340701649	2.829267727	3.352280256	3.249132645	2.572161337
ENSMUSG00000008575	7.8314833	8.724942395	8.786513147	8.726854772	8.604281914	8.301387024	10.48607794	9.960056645	14.01366992	14.16750806	11.23295093	13.53371722
ENSMUSG00000008590	0	0	0	0	0	0	0	0	0	0	0.063339	0
ENSMUSG00000008601	0	0	0	0	0	0	0	0	0	0	0.045869301	0
ENSMUSG00000008604	21.60992307	20.00204086	23.67809422	23.80504187	24.3156162	22.42206888	20.8824681	21.90548955	20.3016137	18.83266254	18.83484932	20.67325346
ENSMUSG00000008658	48.19727607	49.43379635	60.53237559	53.89362654	57.0713448	52.84247499	31.93954943	25.99593139	31.90679323	32.71439736	29.11280482	28.63640859
ENSMUSG00000008668	47.63828598	42.72087244	38.24894462	31.27562688	39.15173864	36.57584415	60.5297037	70.46200762	62.18092348	65.80335956	58.94456367	67.10927516
ENSMUSG00000008682	43.10552964	42.11135866	33.18018963	31.71198489	31.79365189	35.14210055	50.30875392	54.91615666	43.82937021	57.26572338	50.80239053	54.04393215
ENSMUSG00000008683	20.2570817	20.16917927	18.74287615	17.76477365	19.26233334	19.11748682	28.45626591	30.30542436	29.96574451	32.68692139	30.14801485	30.45071498
ENSMUSG00000008690	19.29908805	17.96898214	20.45833891	19.18710201	15.02473461	17.21490511	18.91117312	19.46162127	18.83220707	18.94410081	18.66916821	19.45106507
ENSMUSG00000008730	9.141853009	11.2853072	10.41741254	12.53352832	12.98930875	11.48878013	7.548540825	7.074896372	8.039298843	8.642514679	7.592165128	7.238004399
ENSMUSG00000008734	26.67099059	31.09091007	34.40281507	31.71936576	40.85324229	29.68858856	9.181123888	8.636621636	10.22136236	10.28599616	9.089445222	7.879811371
ENSMUSG00000008763	11.1239	14.095606	13.53618189	12.858535	13.45306198	12.96472163	11.576394	9.567756	11.68876909	12.247425	10.427299	10.651772
ENSMUSG00000008789	0	0	0	0	0	0	0	0	0	0	0	0
ENSMUSG00000008813	0	0	0	0	0	0	0	0	0	0	0	0
ENSMUSG00000008822	10.17719783	6.639341722	7.168165463	5.88375968	6.945994084	7.897979633	4.655318372	4.305871985	3.444578922	4.598149535	5.1745377	3.878815249
ENSMUSG00000008843	0	0	0	0	0	0	0	0	0	0	0	0
ENSMUSG00000008845	0.151865011	0.363309324	0.259957565	0.214601048	0.638027608	0.272139242	0.466727248	0.168383273	0.585618153	0.514150978	0.25118937	0.332184821
ENSMUSG00000008855	14.2302655	15.56478005	14.80618088	15.77927234	15.45112194	16.42057563	12.40701754	11.57808128	11.23513841	10.36775186	9.637175696	9.933437155
ENSMUSG00000008859	21.10070236	21.67775803	21.88361533	21.75878883	21.68844743	19.03158428	55.07116634	59.10059595	60.772577	58.37812221	54.5154571	65.99368938
ENSMUSG00000008874	0	0	0	0	0	0	0	0	0	0	0	0
ENSMUSG00000008892	17.73383136	16.34545642	17.50240874	16.3061251	14.72068992	15.88124283	24.93134281	27.64501703	26.88955799	25.29029259	23.70288911	24.40440787
ENSMUSG00000008932	0	0	0	0	0	0.027214245	0.030112957	0.021177871	0.054284404	0.0275937	0	0
ENSMUSG00000008958	7.385132326	5.775187557	5.9395685	6.550702769	6.51280144	5.917001049	8.58388091	9.930899474	8.414963397	8.636528771	9.386822397	9.21677502
ENSMUSG00000008976	4.559252904	6.079552938	4.913704582	4.69216572	4.642021458	4.811195169	5.568091034	4.811215041	6.0850263	5.655964841	4.560894009	5.583227697
ENSMUSG00000008999	1.97316996	3.429650697	1.016626009	3.392512451	2.415577445	2.100849935	3.264173269	2.442256753	4.154514496	3.358658256	3.792037542	3.014481471
ENSMUSG00000009013	63.30612364	54.56694464	65.41280071	69.92674319	60.91896403	64.27915958	68.85143725	68.79562876	72.91009378	63.29511952	68.50341437	70.54401111
ENSMUSG00000009030	5.686374398	6.041772951	4.510755096	5.393925769	4.14028196	5.703617374	8.595142647	7.198750781	7.398740451	7.691649768	6.052116427	7.979831832
ENSMUSG00000009035	10.45167798	10.18568805	12.11351788	12.02525827	12.87330827	13.3806932	12.87418995	10.30265293	10.99491134	9.694175537	7.891730095	11.58865525
ENSMUSG00000009047	0	0	0	0	0	0	0	0	0	0	0	0
ENSMUSG00000009070	0.093843586	0.112636666	0	0.115849383	0.054177337	0.121533939	0.051947465	0.150873454	0.099600619	0.085649525	0.049851586	0
ENSMUSG00000009073	18.28724089	18.27230038	19.40413412	16.11467438	18.28049706	16.9541785	45.15532825	43.87462474	47.91305486	48.01798428	43.21032683	44.19720166
ENSMUSG00000009075	92.787048	85.915627	109.877998	98.559204	109.443024	103.305901	16.175732	16.109299	19.708828	21.686529	17.524607	16.658958
ENSMUSG00000009076	37.58996051	34.34144758	41.71818029	30.79576168	35.74781935	39.45622847	14.107442	14.78552418	14.78256359	16.63172468	15.28125705	12.61702778
ENSMUSG00000009079	22.04664952	23.61404732	21.60497356	20.11752474	24.73203974	23.67140584	22.45128292	22.5996428	23.14530287	27.13126088	25.05374682	27.33570763
ENSMUSG00000009090	28.91922517	25.76461271	29.597248	30.78377371	28.57844906	30.54779513	25.62717156	24.75871208	26.57582903	24.05562768	23.27230162	22.72867282
ENSMUSG00000009092	0.300378766	0.422872492	0.152652399	0.243204763	0.246724149	0.276491803	0.325378282	0.257817748	0.252865158	0.126070817	0.16941956	0.136256166
ENSMUSG00000009093	0	0	0	0	0	0	0	0	0	0	0	0
ENSMUSG00000009097	0.589292	0.472147	0.692933	0.607107	0.477418	0.229155	0.734626	0.690082	0.948937	0.77896	1.301951	0.909767
ENSMUSG00000009108	0.068720234	0.052875927	0	0	0.029911654	0.18287801	0.030687652	0.035637897	0.048073887	0	0.025537495	0.032616423
ENSMUSG00000009112	5.402488249	5.560786058	5.921087591	6.244950475	6.516471225	6.562298974	7.721638881	7.569514654	7.428553469	8.052396402	6.956029125	7.313314835
ENSMUSG00000009114	0.1297104	0.317766137	0.366980579	0.208508927	0.216342278	0.317694452	0.210442487	0.400371801	0.411483604	0.357705431	0.438886123	0.347221185
ENSMUSG00000009115	0	0	0	0	0	0	0	0	0	0	0	0
ENSMUSG00000009145	0.019651005	0	0	0.025535871	0.056629313	0	0	0	0.017130925	0.019710613	0	0
ENSMUSG00000009185	0	0	0	0	0	0	0	0	0	0	0	0
ENSMUSG00000009207	2.015142748	3.231663643	3.112362569	2.141941479	2.509877438	3.350542333	2.36936524	1.883794577	2.239158601	2.285244833	2.154396588	2.651405453
ENSMUSG00000009210	0.448924142	0.103592088	0.153985363	0.075963588	0.051963814	0.101657823	0.181514189	0.121622119	0.039901063	0.36362444	0.273603035	0.174797164
ENSMUSG00000009214	0.465558392	0.204329295	0.10647528	0.227618418	0.384585631	0.235405545	0.50856411	0.358219821	0.06921067	0.212920377	0.379118911	0.555469794
ENSMUSG00000009216	71.944359	63.735497	87.96946	57.274563	64.465401	61.196499	42.407673	40.562824	46.062115	40.76302	39.717041	40.805298
ENSMUSG00000009246	0.085101997	0.212087687	0.099426029	0.158843771	0.180382937	0.105237237	0.171254619	0.119859056	0.142625007	0.402211933	0.282001877	0.219565114
ENSMUSG00000009248	0	0.140031961	0.047401441	0.232346381	0.027598763	0.084133747	0.288250985	0.134354022	0.041810912	0.057125948	0.259727823	0.379799232
ENSMUSG00000009281	5.68988996	6.08618422	4.687214769	4.00129285	4.455904728	4.747947793	4.354584274	3.923083073	2.655850824	3.695654914	3.522942486	3.605556419
ENSMUSG00000009291	3.432657598	5.23673791	3.534136867	4.268776091	4.34112047	3.924120552	4.518514458	3.682606256	5.232038908	5.76470353	3.312505682	3.602676772
ENSMUSG00000009292	1.986761143	2.13389633	1.987806163	2.177255019	1.939826677	2.251315046	1.180067071	1.091912169	1.33398237	1.413732368	1.280470627	1.152210347
ENSMUSG00000009293	15.26809341	12.83725474	28.98646155	15.78546133	19.40222958	16.29584213	12.67027491	11.39338804	11.09384363	15.38606735	23.24806523	14.092617
ENSMUSG00000009350	0.051200277	0.025827135	0.105857569	0.057774898	0.050811925	0.044224883	0.040802643	0.08911182	0.010975102	0.041124708	0.06791213	0.035227147
ENSMUSG00000009356	0.0778428	0.16404679	0.145965659	0.162393467	0.114303467	0.204169467	0.44835135	0.569787695	0.333210995	0.295742533	0.375904983	0.33233834
ENSMUSG00000009376	0.641762659	1.052442264	0.542592797	0.619947967	0.691332073	0.666104778	4.028270422	3.188234953	3.400308652	2.880475758	2.512700945	3.129999546
ENSMUSG00000009378	1.1495	1.995972	0.509229	1.143094	1.334748	1.077885	0.458788	0.415186	0.320634	1.387414	0.809997	0.721697
ENSMUSG00000009394	60.77642224	94.56354823	114.2597888	66.93235559	99.02510639	53.70578983	36.31694102	63.15888888	36.42133643	36.82993142	34.24839262	63.82725744
ENSMUSG00000009406	14.15433163	12.72600038	17.1785175	16.59235834	15.6182876	15.05612549	7.37770829	7.225479827	7.305148051	7.46562602	7.632397538	7.028623566
ENSMUSG00000009418	3.38094863	6.974787404	6.230197148	7.641574285	6.462737349	6.874927927	21.86501925	18.31717517	24.19192786	25.29084064	19.94757724	21.4373369
ENSMUSG00000009470	4.942183368	6.507136665	4.775006026	5.961692535	6.153354672	6.523522131	7.811644078	6.383207594	8.441312152	8.843579655	6.610744461	7.139644703
ENSMUSG00000009471	0.038003	0	0.130546	0	0.048138	0.097941	0	0	0	0	0.041236	0
ENSMUSG00000009487	0.006833782	0	0	0	0	0.008835783	0	0.01375102	0	0.017857888	0	0
ENSMUSG00000009535	6.583597835	7.756625757	7.185508875	7.866418597	7.347070352	7.380065588	9.008743922	8.361811417	9.783487099	9.193270422	4.299067259	8.845960399
ENSMUSG00000009545	0.144976835	0.091336968	0.04913374	0.330771536	0.053478538	0.189158941	0.324902247	0.448246022	0.299054051	0.289268276	0.297691473	0.213806106
ENSMUSG00000009549	45.41637126	65.19863993	40.71448346	46.57967717	48.2702438	46.76694424	51.18541696	48.28405933	47.20845613	46.35608163	59.02673028	66.70667169
ENSMUSG00000009551	0.448381767	0.469902872	0.640613816	0.556714245	0.798389065	0.681367862	0.583339939	1.100897306	0.895502945	1.158896878	1.065117719	1.130841908
ENSMUSG00000009555	8.521819623	8.228797528	9.213616043	9.046569068	8.445388052	8.441348559	10.43933099	6.604033709	9.309337038	8.056678677	8.871491016	8.666239652
ENSMUSG00000009563	4.271238634	5.388430775	5.982020923	5.250581965	5.867266146	4.878346663	5.057843398	6.138575046	3.443865206	5.100142353	5.281161224	4.804877831
ENSMUSG00000009566	1.812873156	1.73899009	1.486362517	1.486017445	1.721359725	1.711244107	3.200274385	3.308180637	3.019511383	3.782446648	3.988151456	3.553063205
ENSMUSG00000009569	19.95076108	22.20257268	23.47001795	24.6277619	23.92958095	22.31784917	13.81092884	11.54134637	15.01759778	12.6526525	11.38492493	11.75186873
ENSMUSG00000009575	20.96498646	24.58580623	21.3698499	23.48903849	21.41781841	21.12739653	27.36473811	24.97720577	28.78263031	27.52211654	24.75521286	27.78742553
ENSMUSG00000009580	0	0	0	0	0	0	0	0	0	0	0	0
ENSMUSG00000009585	0.210836016	0.239333619	0.268201288	0.329951027	0.353354748	0.197255427	0.264095407	0.189694701	0.183098294	0.229257711	0.254125389	0.275358888
ENSMUSG00000009588	0	0	0	0	0	0	0	0	0	0	0	0
ENSMUSG00000009596	0.031082123	0.015072234	0	0.051224931	0	0.040729903	0	0.09783477	0.030330449	0	0	0.029947146
ENSMUSG00000009614	2.708390304	2.996194131	2.507058682	1.857809594	1.799771677	2.339838701	2.323038652	2.45535946	2.504617516	2.990932057	2.431912755	2.357554793
ENSMUSG00000009621	1.855190437	1.942117038	2.004686901	2.495946869	2.687380477	2.066563902	8.528760598	8.323879764	9.330376255	9.211642596	8.10181426	9.736685305
ENSMUSG00000009628	0.055052663	0.075147968	0.053139346	0.12030956	0.080566818	0.069969938	0.101578033	0.123674399	0.241802158	0.25126876	0.142786917	0.137853621
ENSMUSG00000009630	50.788631	50.887268	57.695683	55.629368	53.426304	59.238594	65.717339	61.393467	59.248344	61.819675	64.249405	64.591606
ENSMUSG00000009633	5.339277	6.115457	6.476402	4.19129	4.736738	4.525404	2.547877	3.706003	2.193216	2.646986	2.43346	1.775375
ENSMUSG00000009640	7.267369823	6.80813321	6.717124734	6.903420035	5.428541298	6.785280319	8.117773956	8.722745723	7.818871436	8.099713999	8.399770479	8.282825778
ENSMUSG00000009646	0	0	0	0	0	0	0.051605592	0	0	0	0.061677497	0
ENSMUSG00000009647	5.914725108	5.105535472	5.835623694	5.763743344	6.051394268	5.295199903	7.687293087	6.935436529	7.349957566	6.906399639	6.298316823	6.170218299
ENSMUSG00000009654	0.189913982	0.248978746	0	0	0	0.06559489	0	0	0.025006923	0.033254989	0.055049461	0.041864019
ENSMUSG00000009670	0	0	0	0	0	0.023713038	0	0	0.01923835	0.049632212	0	0
ENSMUSG00000009681	15.18760448	16.37554793	17.87147777	18.3892888	18.53807866	17.85249062	13.89660993	13.69927305	13.31473994	12.75389187	11.75070474	13.7861914
ENSMUSG00000009687	0.803379971	0.719289491	0.786619873	1.301164108	1.262870963	1.058486185	1.147622505	1.388744533	0.792615193	1.188126058	1.478261934	0.984804928
ENSMUSG00000009731	1.451871302	1.38993603	1.854456129	1.878889806	1.467106113	1.852037899	2.690152241	2.625695347	2.643778769	2.218659402	2.555465807	2.897689094
ENSMUSG00000009733	2.138992826	2.000392519	2.189170043	1.994551477	1.766528107	2.019381297	2.594721229	2.61923512	2.45207864	1.96028218	1.930446048	1.985573555
ENSMUSG00000009734	0.066689552	0.038675511	0.039746138	0.1058267	0.162454903	0.149714223	0.055814142	0.10550496	0.107209214	0.045483409	0.054088213	0.033419003
ENSMUSG00000009739	11.04755095	5.966117971	14.06846904	12.86557768	15.34678156	14.63149842	12.9274239	12.15008837	12.22986991	13.63281097	13.20805029	13.35379457
ENSMUSG00000009741	4.793441164	5.302326862	5.027520858	6.79105675	6.75302306	6.068199571	5.129791668	4.258906825	5.20489017	4.471987398	4.411336939	5.484154159
ENSMUSG00000009772	0.366041682	0.165331589	0.399225836	0.244772155	0.259957013	0.272535554	0.854705315	1.100758775	1.052656284	1.148315309	1.119639273	1.11481884
ENSMUSG00000009828	2.196705791	2.498165815	2.059169178	1.708851853	2.107361472	2.124831502	3.631807236	4.246969277	4.022508513	3.920929416	3.183536941	4.040574787
ENSMUSG00000009863	48.18476466	44.27345523	43.93190288	39.15244131	35.24061936	43.88008346	42.68062623	49.42731267	44.1005404	44.02792398	45.06143779	42.20190913
ENSMUSG00000009876	1.838977226	1.621742204	1.178763532	1.259384369	1.755325341	1.30621522	1.927026321	0.810000211	1.312385089	1.730767541	0.958918994	0.985137069
ENSMUSG00000009894	97.88543713	79.09178021	91.55445317	76.27598411	81.25515332	84.46317433	77.69609462	85.68668486	83.61706626	82.66150661	82.20856384	82.67989906
ENSMUSG00000009900	0	0.055911	0.043996	0.031622	0	0	0	0	0	0	0	0
ENSMUSG00000009905	3.235969556	3.150985356	3.387506255	3.16300083	3.099015008	3.005916098	2.766306944	2.490832328	2.658573952	2.597770176	3.096034897	2.724712262
ENSMUSG00000009907	3.387627076	4.269729314	2.688339904	3.933296295	3.477414784	3.95945759	2.422845568	2.619530778	2.207796413	2.713910167	2.883626747	2.358762342
ENSMUSG00000009927	31.58766499	30.33603435	29.71762186	26.77313086	25.34917904	27.76320665	40.2850673	27.73585435	25.44256958	37.8709721	35.34777605	44.88001341
ENSMUSG00000009941	0	0.030056937	0.031534857	0	0	0	0	0	0	0	0.027895969	0
ENSMUSG00000009995	1.794187449	2.180964962	1.600801249	2.4549064	2.402123631	1.965353096	1.332735057	1.057414946	1.929562066	1.829361117	1.226293104	0.97752578
ENSMUSG00000010021	1.336432371	1.958517099	1.31013401	1.144135717	1.095933502	1.190797237	1.009318502	0.960948206	0.87874757	1.109134993	0.877805147	1.002535773
ENSMUSG00000010025	8.834865369	8.959503734	7.97262571	8.779516678	7.716035629	8.947766618	8.390405337	8.34627344	9.040074319	8.736511057	8.421529317	7.34104265
ENSMUSG00000010044	1.787812177	2.074388687	1.286370261	1.148196508	1.071351871	1.234050707	1.51473847	1.186715899	0.643472403	1.433734391	1.828418108	1.592191904
ENSMUSG00000010045	14.155349	13.738223	13.22007	14.167889	13.496857	15.85858	13.997853	14.584963	14.298888	15.155781	13.797945	14.650738
ENSMUSG00000010047	2.313732964	2.245357971	1.411088292	1.61993542	2.467765948	2.511049252	2.941085943	5.914846406	2.610221678	2.829967318	2.726888077	5.000454874
ENSMUSG00000010048	2.144455921	2.209512055	1.992296535	1.909704493	2.56616271	1.930915826	2.084850808	1.972557093	2.37912381	2.494832791	1.784125127	1.840210642
ENSMUSG00000010051	1.110366537	1.00950458	0.455256979	0.695225226	1.770687558	1.261581542	0.276165213	0.416414977	0.289980302	0.564042554	0.344956501	0.457325859
ENSMUSG00000010054	43.34568885	37.88048481	45.35303897	47.28665987	40.11303304	44.37068956	37.47854368	40.31439842	35.30271755	34.36102154	37.43025876	36.44239186
ENSMUSG00000010057	10.05584643	10.90933748	11.90609124	10.65457567	8.65696227	8.504864581	7.679086384	9.321640465	9.084922877	8.241455666	9.172378562	9.562744343
ENSMUSG00000010064	11.64909148	15.18646738	8.052608617	11.61850266	12.54923767	10.3707276	14.17445955	14.50665989	14.63979565	17.5699656	16.20885136	15.46560781
ENSMUSG00000010066	3.274431905	4.286063489	3.123151828	3.586035555	2.693651738	3.41931719	5.093802171	4.332657669	4.397736608	3.794586518	4.171442331	4.443004277
ENSMUSG00000010067	1.623787265	1.836223967	1.476899664	1.964772575	2.072745725	2.202045857	2.58522306	2.267325759	1.826962653	2.475064356	2.541017906	2.428923831
ENSMUSG00000010080	1.897819376	2.909270711	0.263965884	2.525398071	2.651027736	1.862372405	0.993380684	1.082749757	1.08611901	2.089313808	1.756177663	0.907817911
ENSMUSG00000010086	61.25002828	48.17197085	63.66819295	47.94396107	47.4055997	55.27301622	19.29133103	17.4513659	22.06404101	27.68284509	22.51173239	24.23871814
ENSMUSG00000010095	31.48636837	30.00181038	26.70984301	33.06874129	29.96973462	31.00827798	36.77911106	35.16854313	34.95932153	37.39132445	36.96247211	36.6022883
ENSMUSG00000010097	12.31855084	12.37083138	12.06776425	11.56753284	10.91613144	11.68160253	13.21716422	14.157724	13.76638646	13.96992409	12.82953693	14.42438109
ENSMUSG00000010110	3.021042407	3.041766314	4.228757039	3.330950616	3.248444659	3.37403195	3.237723721	4.404371697	3.81787808	3.528639919	3.569119446	3.554800319
ENSMUSG00000010122	0.041741184	0.432751798	0.310874917	0.338050364	0.346935261	0.155055585	0.044908304	0.385025448	0.389088757	0.054812289	0.134212806	0.124585183
ENSMUSG00000010136	2.140725602	2.83671878	0.560719143	2.109219122	1.813697021	0.970101567	1.383707776	2.166286322	0.673115672	2.84727818	1.929948909	1.298220613
ENSMUSG00000010142	0.532667394	0.713520152	0.683036924	0.422991769	0.32767902	0.531674137	0.416725865	0.413561882	0.549849474	0.261211872	0.121766001	0.344993709
ENSMUSG00000010154	5.859507207	6.124961972	6.664627104	7.274980351	6.9947285	7.392466191	8.315627972	9.700393386	7.872142641	6.690103936	7.042807454	8.58592004
ENSMUSG00000010175	12.05104858	11.75579941	12.97522326	13.18994846	14.35066947	11.84703311	14.70299509	12.45498367	18.14214556	17.405976	13.13267305	15.64309335
ENSMUSG00000010205	9.266536	10.299508	10.982552	10.671222	7.939599	8.823463	9.738403	11.745349	14.909244	11.658199	12.573027	12.077787
ENSMUSG00000010277	31.74641997	35.61825743	35.21180751	34.74544194	34.34470917	33.68226139	32.26458346	27.7863785	33.53952049	33.64137707	27.88822801	28.8677414
ENSMUSG00000010290	9.021991	7.95938	8.793908	9.324237	8.911806	9.756833	10.914948	9.006664	9.702342	9.192363	9.286701	9.310204
ENSMUSG00000010307	7.863858755	8.813939135	5.466330665	6.31586809	6.351832151	7.778525616	6.082140092	5.611001012	6.10644613	7.488481437	8.890684913	6.780125821
ENSMUSG00000010311	0.117918894	0.139882722	0.07851844	0.19812265	0.069232573	0.142040872	0.452493998	0.631204698	0.749899235	0.274489674	0.446277548	0.397982568
ENSMUSG00000010342	0.056138614	0.076385639	0.087593033	0.041732771	0.052989562	0.077384976	0.091226434	0.027343078	0.06493506	0.054857145	0.119685812	0.0690578
ENSMUSG00000010358	1.00880432	1.651865461	1.909825188	1.912427407	2.511873868	2.574089885	0.465189641	0.48153443	0.477207891	0.477595723	0.663564532	0.40364901
ENSMUSG00000010362	2.023353138	2.193095159	1.814803451	2.566532213	2.15957166	2.653179347	1.516151046	2.114787738	1.443080948	1.876792446	1.611918498	2.469578345
ENSMUSG00000010376	54.82530152	51.48047356	39.15473692	34.1687694	47.24577641	49.5634543	50.52789326	70.83746312	47.14109303	43.0647906	65.02979815	46.67313578
ENSMUSG00000010392	11.664534	11.774582	11.026053	12.572021	13.907331	12.67822	13.165495	9.906515	12.454453	14.28390084	12.767992	13.222439
ENSMUSG00000010406	16.21621546	14.25897516	16.72049183	13.6228478	14.26747072	15.31361543	24.09164525	22.09229184	22.23559622	22.28531992	18.90465741	22.4773505
ENSMUSG00000010435	0	0	0	0	0	0	0	0	0	0	0	0
ENSMUSG00000010453	7.965569746	8.840307803	8.361341197	10.33094036	9.477619542	10.07848683	9.584460275	9.234227656	9.077116441	10.05697357	7.778570192	8.48410504
ENSMUSG00000010461	0.277647546	0.3362174	0.280581638	0.409172039	0.319792788	0.429494609	0.248278743	0.193597405	0.228094594	0.262932262	0.13592911	0.238195588
ENSMUSG00000010476	0.166026818	0.561033745	0.077220097	0.100393635	0.11961953	0.039573675	0.29120062	0.430289768	0.379056346	0.424726999	0.455186029	0.373212189
ENSMUSG00000010492	0.576521856	0.70432567	0.927477816	0.256566252	0.393863462	0.721337607	0.748284286	0.942987684	0.669849266	0.488340722	0.492461762	0.94603289
ENSMUSG00000010505	1.106406655	1.803543242	1.33423696	1.804899468	1.422409184	1.266307819	2.522522832	2.363866704	3.00761836	3.051095034	2.316033961	2.387866307
ENSMUSG00000010517	5.533975758	5.888220384	5.633901272	5.345585399	4.732615235	4.957045037	8.992648156	9.25582733	9.248439618	8.799001264	8.903791274	9.789607338
ENSMUSG00000010529	2.788065	2.725734	2.018196	1.334606	1.321536	2.100712	3.614158	2.139402	2.279388	3.676824	2.491453	1.920816
ENSMUSG00000010538	0.519822554	0.52976	0.439624331	0.820731698	0.070541633	0.616719245	0.571736712	0.629450777	0.592741695	0.250131259	0.88379182	0.171434755
ENSMUSG00000010554	1.739798402	2.170536115	1.926190761	2.567787312	2.367571251	2.105503687	2.023020734	1.818674869	2.081099925	1.650465494	1.789477278	1.792114738
ENSMUSG00000010592	0.887964	0.812656	0.792113	0.539612	0.756948	0.89688	0.404637	0.277426	0.684232	0.234152	0.329844	0.340211
ENSMUSG00000010601	0	0	0.079761614	0.143254028	0.088727468	0.030187854	0.025827623	0.0704762	0	0.059279733	0.025335262	0.123047521
ENSMUSG00000010607	26.1999794	23.6811109	24.01462887	17.22738648	23.15995889	21.41576971	22.96906626	21.44149719	18.29673131	17.98027727	19.45745188	23.08340659
ENSMUSG00000010608	3.874764743	4.54181676	4.140438638	4.138168784	3.813496626	4.139908289	3.616824621	3.596990593	4.812164008	4.989740413	4.307442374	4.997230081
ENSMUSG00000010609	3.51123819	3.340100336	3.79957954	3.586433645	3.145850331	3.53095031	3.35866559	4.204878772	4.158202808	3.616442431	3.396880744	3.219378498
ENSMUSG00000010651	0.071852229	0.148115854	0.083311087	0	0.426306355	0.244956297	0.350778495	0.780853291	0.33270287	0.138192396	0.511053666	0.680317768
ENSMUSG00000010660	3.150408876	2.95542324	2.591926258	2.137127368	2.030952869	2.314181509	3.369343264	3.171117326	3.968980871	3.299603938	3.088768793	2.759660309
ENSMUSG00000010663	59.43256	67.269638	60.020599	62.116802	61.67226	61.537189	56.472839	59.279411	59.497837	62.044514	57.964394	57.46682
ENSMUSG00000010721	4.554535109	3.835413744	4.671310258	4.249806976	4.46504827	4.705170269	7.261106827	7.047356581	7.550142757	7.233286353	6.054224138	7.107162328
ENSMUSG00000010751	0.252830956	0.254051401	0.447927116	0.139335822	0.308402077	0.124002682	0.416765077	0.616196659	0.579117345	0.638613376	0.450317895	0.376538101
ENSMUSG00000010755	4.33018141	4.035403286	3.908180316	3.382541785	3.763598726	3.853167349	6.307267544	6.399479234	6.363131715	5.456091237	5.221545798	6.174193774
ENSMUSG00000010760	0	0.06816579	0	0	0	0	0	0	0	0	0	0
ENSMUSG00000010796	0	0	0	0	0	0	0	0	0	0	0	0
ENSMUSG00000010797	2.005021	1.979551	2.508352	1.182554	1.779124	2.302665	2.52299	3.024892	3.27961	2.895628	2.978035	3.202705
ENSMUSG00000010803	27.23011415	30.4547331	31.83847348	31.3607955	31.29788193	34.60249458	13.71232095	10.28792816	12.87318982	10.99876656	10.39419257	9.964782028
ENSMUSG00000010825	0.126771007	0.217304169	0.141292149	0.09725667	0.13355031	0.077538531	0.26955984	0.152053068	0.269953084	0.236451239	0.125022664	0.249207108
ENSMUSG00000010830	0.617403	0.952094	0.286584	0.185629	0.444222	0.386018	1.531387	1.142584	1.081932	2.054503	1.636674	1.581206
ENSMUSG00000010841	0	0	0	0	0.073214476	0	0	0	0	0	0	0
ENSMUSG00000010911	6.376531937	9.247654604	7.370282252	7.487774996	5.911431216	5.340477015	9.734705648	8.892213476	8.917532287	9.094894485	10.17796539	8.115601884
ENSMUSG00000010914	10.70396016	10.51413585	10.28915606	9.957561746	10.29154916	10.55791448	12.97498178	12.07479183	12.55298057	12.99648481	13.14744118	12.59550018
ENSMUSG00000010936	3.039544575	3.189237184	2.519266817	2.899446922	3.239922406	2.94721597	5.620393195	6.330843469	6.757558206	5.795865791	6.230228684	6.240756752
ENSMUSG00000011008	0	0	0	0	0.026973504	0	0.023793613	0	0	0.049007409	0	0.059429497
ENSMUSG00000011034	0.085647	0.264306	0.078141	0.08467	0.084332	0.055627	0.075805	0.058951	0.075766	0.067774	0.10233	0.047968
ENSMUSG00000011052	0.479904	0.287052	0	0	0.31041	0	0	0.642511	0	0	0.253899	0
ENSMUSG00000011096	13.95337805	13.03453383	17.26334907	14.41523424	12.94428642	9.142587898	14.8568836	15.24216452	15.88584371	11.17387635	18.4567632	15.03537619
ENSMUSG00000011114	9.807165586	7.627159314	7.473663199	8.429173237	8.312704785	9.271118546	13.34008065	13.49268356	12.75800577	11.15115564	11.72799517	11.82080494
ENSMUSG00000011118	0	0	0	0	0	0	0	0	0	0.026729542	0	0
ENSMUSG00000011148	6.684340195	8.475264811	6.121745362	5.152692844	7.670527955	7.703399252	0.857190539	0.612571623	0.698520199	1.221270687	1.139648496	0.915611716
ENSMUSG00000011154	0.624251084	0.849610601	0.390805589	0.351548195	0.575385474	0.22735421	0.447700817	0.533973343	0.337763567	0.644697537	0.568386873	0.447954579
ENSMUSG00000011158	4.416829051	4.483188207	4.850794671	4.985656727	5.473762156	4.614914719	4.708621272	4.697962266	4.935035883	6.344956387	5.145220584	5.132656674
ENSMUSG00000011171	0.103108352	0.252268862	0.19917403	0.058557054	0.080023906	0.040976521	0.209298774	0.326756331	0.30696158	0.375853088	0.205360605	0.352891529
ENSMUSG00000011179	19.76642362	21.71049042	21.54570864	18.65733505	18.70196132	20.25847548	25.95384581	27.24853915	28.87800913	33.58381624	31.14003651	33.77087663
ENSMUSG00000011254	2.451496154	2.947722184	2.841269502	2.017964134	2.363278261	2.747614946	3.042685031	2.983111659	3.456410642	3.791741411	3.199402353	3.299778972
ENSMUSG00000011256	2.745026407	2.896905203	2.696672656	2.44861567	2.81642609	2.473562863	10.29675506	8.445271914	10.6571844	10.06697939	7.728683502	9.264775795
ENSMUSG00000011257	7.414544744	8.386451412	7.399171072	8.000427385	9.272007183	7.739727747	11.44817329	13.79883018	12.11600312	13.66446874	14.81889446	12.37819997
ENSMUSG00000011263	0.275696	0.300657	0.059487	0.173774	0.111238	0.090468	0.272594	0.272746	0.233263	0.394087	0.331531	0.173063103
ENSMUSG00000011267	0.478314764	0.184049912	0.28211628	0.470611144	0.179099381	0.28364863	0.144405804	0.064414303	0.237928542	0.042660486	0.353693439	0.083850844
ENSMUSG00000011305	0.430498568	0.478719257	0.28973047	0.744377922	0.310019644	0.453324722	0.90140705	1.180839249	0.719457286	0.964175879	0.701575673	1.116139613
ENSMUSG00000011306	7.088335567	5.940087707	6.665378956	7.348981772	5.906630179	6.549309198	5.649427102	6.11998805	5.994600625	5.811470951	5.440452439	6.412655106
ENSMUSG00000011349	0	0	0	0	0	0	0	0	0	0	0	0
ENSMUSG00000011350	0	0	0	0	0	0	0	0	0	0	0	0
ENSMUSG00000011382	0.939376436	1.055625431	0.856222264	0.685054904	1.180038856	1.211820952	0.551910049	0.439148011	0.574962724	0.395548425	0.497313017	0.383842184
ENSMUSG00000011427	2.801340172	3.319379177	4.146882077	4.871123458	4.343470695	4.774043434	4.468228808	4.369272055	4.349187743	5.090615239	3.957038687	5.737113818
ENSMUSG00000011463	0	0	0.024659808	0	0.103233513	0	0.133025166	0.066158967	0.200267352	0	0	0
ENSMUSG00000011486	0	0	0.060843201	0	0	0	0	0	0	0	0	0
ENSMUSG00000011589	19.951921	17.702274	20.570297	17.350431	18.90592	18.692492	32.3423	33.530861	30.406647	32.201214	34.239716	33.252136
ENSMUSG00000011632	0	0	0	0	0	0	0	0.083284	0	0	0	0
ENSMUSG00000011658	4.052645762	3.996710431	3.631768626	3.523992224	3.462342847	3.257319678	2.523120737	2.595637841	2.407267232	2.387309933	2.466886127	2.842786569
ENSMUSG00000011751	15.83998969	17.72888369	20.89896338	17.44387655	17.55925374	16.63299731	10.24669985	9.294111026	10.79149136	11.1331125	10.12663535	10.30270689
ENSMUSG00000011752	223.85968	201.697235	220.999771	221.283554	209.972061	208.561371	178.382751	168.727646	166.172577	179.458435	184.745575	163.600204
ENSMUSG00000011831	4.818528622	5.928362092	5.061096958	5.77543245	5.306965044	5.58627247	4.571732137	3.937617297	5.764689715	5.647017396	4.504681792	5.515132972
ENSMUSG00000011832	12.37792925	12.01718887	7.769786789	12.89854452	9.017436348	12.73294251	21.37976723	13.39608366	15.80111407	21.7429489	14.1964763	15.84583593
ENSMUSG00000011837	13.46562133	11.21644523	12.09200623	9.68256599	10.84166727	12.31274834	15.00923	17.11876534	15.08996443	13.66958771	14.31709459	15.96940135
ENSMUSG00000011877	66.92879494	70.46959806	90.70354325	69.68954781	84.30565332	77.12248	36.57013462	37.52043186	37.92142329	40.33684506	41.11608443	40.66704585
ENSMUSG00000011884	32.619553	35.273762	27.047668	21.768139	36.733849	29.431475	14.399049	13.922168	17.684874	16.384468	15.744073	14.074755
ENSMUSG00000011958	3.630075472	4.982084954	4.328606144	4.454709573	5.081911411	4.48603572	4.908914217	4.331340447	5.498472693	5.976635637	4.608075134	6.130643267
ENSMUSG00000011960	3.166417622	3.477915074	3.324685025	3.78973352	3.589455826	4.134749631	4.468150503	4.144467335	4.62739444	4.204609104	3.480127448	3.913502371
ENSMUSG00000012017	0.951966	1.565992	0.841704	1.146872	0.791372	0.69073	1.495262	1.556466	1.963045	1.524297	2.063196	1.895302
ENSMUSG00000012042	0	0	0	0	0	0	0	0	0	0	0	0
ENSMUSG00000012076	13.46576673	15.45813355	14.8770828	13.49036976	13.25076373	16.72145473	13.13620385	12.09898527	13.59495911	12.62133594	11.65103615	13.84452954
ENSMUSG00000012114	17.64382078	9.742773522	15.99117543	11.86618995	16.92703657	15.62851111	11.28789293	11.77949305	14.90291821	10.84639635	14.5017443	11.08040071
ENSMUSG00000012117	17.95114258	13.32336883	17.30934254	13.711387	11.32234712	7.464657975	10.99829981	16.13690315	13.328549	14.37234804	10.78025017	14.04127338
ENSMUSG00000012123	0.008824266	0.046540024	0.014052628	0.015444789	0	0.042314304	0.066382015	0.147932003	0.08296117	0.098126402	0.118579939	0.058515621
ENSMUSG00000012126	2.999544703	3.182171036	2.476901542	2.724787017	3.257808235	2.680680735	2.318855196	2.631546507	2.195294539	2.425215707	2.941858939	2.350474538
ENSMUSG00000012187	0.068090343	0.212366845	0.103956496	0	0.110828345	0	0	0.090430915	0	0	0	0
ENSMUSG00000012211	0	0	0	0	0	0.069498442	0	0	0	0	0	0
ENSMUSG00000012282	0	0	0	0	0	0	0	0	0	0	0	0
ENSMUSG00000012296	2.794795576	1.980689674	1.85000419	2.241395283	2.102609601	1.770995055	2.125052849	1.220645476	1.867803559	1.689304873	1.316894035	1.510374296
ENSMUSG00000012350	0.031982684	0.088591353	0	0.069676647	0.071655478	0.032578978	0.014030544	0.025395397	0.018755213	0.066510037	0.013762051	0
ENSMUSG00000012396	0	0.034427302	0.034675817	0	0	0.040649067	0	0.095215009	0	0	0.032583158	0
ENSMUSG00000012405	62.17451268	68.88170371	64.71902287	60.26529202	64.52657684	67.3551857	121.4444779	128.1138097	124.4560281	122.2202468	116.1819571	127.4100508
ENSMUSG00000012422	2.854228126	3.831840585	3.426273624	2.667669325	3.373901126	3.66473326	3.750977605	3.638508901	4.326866907	3.994468132	3.601206944	3.664082597
ENSMUSG00000012428	0.331012	0.532755	0.025668	0.442395	0.453842	0.433961	0	0.045108	0.154022	0.566088	0.650309	0.024663
ENSMUSG00000012429	1.925220708	1.425953951	1.812670152	1.861846113	1.336153994	1.724254784	2.33813329	2.118373053	1.716992787	1.766914768	1.49935131	1.743848149
ENSMUSG00000012443	0.30516	0.463656	0.419687	0.144274	0.23984	0.293433	1.489787	1.801449	2.130211	1.802074	1.288545	1.609303
ENSMUSG00000012483	3.540819683	3.766410375	2.289742004	2.733224718	3.113665349	2.173820104	4.983891032	5.322177009	5.146045097	4.202122254	3.7588376	4.892110526
ENSMUSG00000012519	0.06100844	0	0.070327652	0.189551813	0.155208955	0.140761412	0.269607739	0.077244714	0.127202189	0.098654925	0.065531933	0.114536289
ENSMUSG00000012520	0	0	0	0	0	0	0	0	0	0	0	0
ENSMUSG00000012535	4.56188116	5.494340766	4.971153817	5.288697832	5.847764329	5.492957641	6.990657047	5.582721143	7.373535746	5.530491141	5.894404346	5.598428122
ENSMUSG00000012609	1.502677818	2.34322718	1.674224068	2.162798347	1.666746351	1.839849788	1.490982405	1.201402521	1.677795451	1.321979579	1.216920356	1.104884538
ENSMUSG00000012640	4.228907645	4.636492926	4.349809598	3.871116987	4.293095761	4.467236921	3.699947122	4.022782735	5.528481632	4.033623397	3.709316231	4.410161265
ENSMUSG00000012705	0	0.073323664	0.049577041	0	0	0	0	0.212570431	0.21512727	0.112542402	0.048599738	0.042245184
ENSMUSG00000012777	0.762559492	0.518915985	0.677911005	0.612928441	0.443275519	0.642822513	1.107886567	1.237979687	1.00267341	0.905840459	1.013593836	1.184308999
ENSMUSG00000012819	0.045020915	0.088258395	0.08239793	0.074352345	0.0707605	0.073839239	0.048417079	0.051138286	0.068214098	0.066028769	0.05865303	0.06569114
ENSMUSG00000012848	81.98959101	85.81792088	86.4151593	67.00938241	73.72933543	75.49591684	127.1365018	147.4297794	128.9989937	132.3327213	128.0408839	137.1971915
ENSMUSG00000012889	0	0	0	0.024600438	0	0.025764454	0.066130859	0	0	0	0.021622526	0
ENSMUSG00000013033	51.38249881	51.10167164	59.76059415	53.68893041	54.06284822	35.80060503	70.83970149	62.08003354	65.39468947	80.88556952	76.02807111	74.70311004
ENSMUSG00000013076	1.96012774	3.036505471	1.964953906	2.641916476	2.994828818	2.482909009	3.461354477	2.84255664	3.592565625	3.886476891	3.281964114	3.406687329
ENSMUSG00000013083	0	0	0	0	0	0	0	0	0	0	0	0
ENSMUSG00000013089	18.46655277	17.37203851	20.03009475	20.46003513	21.42855191	22.97925411	15.66332813	14.22221479	15.54956559	13.49658972	13.45976659	15.38124748
ENSMUSG00000013091	0.316564379	0.25255433	0.327873041	0.267863	0.15524106	0	0.495801248	0.517058519	0.744400072	0.41534682	0.405668363	0.385734886
ENSMUSG00000013150	4.232106845	4.468048371	4.293473755	4.438926667	4.661426215	4.432908228	9.346563945	10.6302524	9.304597423	9.354344889	8.931114923	9.972568897
ENSMUSG00000013155	1.586659451	0.939730528	1.397462551	1.564533361	1.105828767	1.05262986	1.646107137	2.152642047	1.811136064	2.011258883	2.073668326	1.545220085
ENSMUSG00000013158	0.15058581	0.190375017	0.171175907	0.072173134	0.184090366	0.202264098	0.190575001	0.222100034	0.157886114	0.176282252	0.187186907	0.236179463
ENSMUSG00000013160	128.9341607	107.8460416	128.7430817	122.4868345	114.0455689	116.0995984	130.0783924	128.1246998	129.8090039	121.7251719	131.2813971	119.3594157
ENSMUSG00000013236	25.18442307	26.13033898	29.29077311	27.73533048	26.3474846	23.98409883	35.68259154	32.20137814	36.31879929	39.02619392	36.30848663	35.07957402
ENSMUSG00000013275	15.35539782	18.32278612	18.64298536	20.03678347	19.85196129	19.60944663	18.03181856	15.09978713	16.64205458	17.97494125	17.21835726	18.13633994
ENSMUSG00000013338	0	0	0	0	0	0	0	0	0	0	0	0
ENSMUSG00000013353	0	0	0	0	0	0	0	0	0	0	0	0
ENSMUSG00000013367	10.010912	9.045192	10.171415	9.047793	9.446881	7.835835	27.08349	28.146727	24.653242	23.897985	24.180538	27.071201
ENSMUSG00000013415	0.007231455	0.007786123	0	0	0	0.009444071	0.048077017	0.054851585	0.080769562	0.047848573	0.115692894	0.08233589
ENSMUSG00000013418	0	0.114598	0	0	0	0	0	0.041894	0	0.023486	0	0
ENSMUSG00000013419	12.64043634	13.73182487	14.39162967	14.98122023	14.5788538	14.45704343	16.49221886	16.99616262	16.39413062	13.50851258	11.72017185	12.12128263
ENSMUSG00000013465	10.96023759	11.26072125	10.12200639	9.451283037	9.84602594	10.20141012	14.01649252	14.67078603	10.97503439	11.46971818	11.67413195	12.30891643
ENSMUSG00000013483	0.396050843	0.561803777	0.597588115	0.509737059	0.444146181	0.55560301	0.322578736	0.23413948	0.396906657	0.310611045	0.213892225	0.375201687
ENSMUSG00000013495	6.514135076	7.068052896	7.54038403	6.552132803	6.522093384	6.647533401	4.829406609	4.294576316	5.075768591	4.873012179	4.685562518	4.637195215
ENSMUSG00000013523	23.63575909	45.32622646	32.56084477	28.39047884	56.95807383	46.89499844	6.161700679	5.774137107	6.41065627	7.383592137	6.699676244	4.386872632
ENSMUSG00000013539	4.887168511	4.716103756	5.1159629	5.097360271	4.329491984	5.858380579	5.360368297	3.687906787	4.683134201	5.724386207	3.644424606	4.668937887
ENSMUSG00000013562	0	0	0	0	0	0	0	0	0	0	0	0
ENSMUSG00000013584	1.656451	1.706389	0.743886	2.873098	2.312702	1.779773	3.814938	1.99894	5.03674	3.163	3.202787	4.737588
ENSMUSG00000013593	83.55501492	71.52784584	83.36296852	75.69109631	73.9053664	78.78368535	66.4970716	63.07587582	65.0671146	65.24766487	65.9378376	61.90863612
ENSMUSG00000013611	0.024015986	0.02629863	0.079464485	0.059493877	0.030523129	0.060855196	0.07801039	0.359306529	0.128272696	0.182944038	0.141800414	0.078830673
ENSMUSG00000013622	11.67386095	14.04182089	13.52169741	10.27498002	12.1374828	13.95972447	12.92484204	11.75855331	10.55061178	11.57024953	13.46314246	10.86299701
ENSMUSG00000013629	1.658576936	1.623161365	1.602402103	1.823133564	1.686576716	1.928561712	3.822138822	3.48428295	3.684165093	3.592434757	3.307717792	3.744175427
ENSMUSG00000013643	0	0.178772426	0.062439572	0	0.139541322	0.032411729	0	0	0	0	0.257591599	0.058378138
ENSMUSG00000013646	7.272175369	5.782232015	7.067031853	6.745820692	4.417610641	6.347454023	6.385585053	8.256729735	7.595617278	7.040529095	5.673455634	6.101523112
ENSMUSG00000013653	0	0	0	0	0	0	0	0	0	0	0	0
ENSMUSG00000013662	34.156734	36.894089	33.735699	33.044285	30.950542	34.752205	35.985996	32.440357	39.244862	40.553486	38.749924	41.34396
ENSMUSG00000013663	10.03903779	11.39701309	10.10348044	12.36158147	10.78853006	10.80416133	12.2269912	11.10815663	12.84333655	12.65595458	11.79755243	12.29731824
ENSMUSG00000013668	0	0	0	0	0	0	0	0	0	0	0	0
ENSMUSG00000013698	167.9093306	144.3673499	160.010722	162.5722684	143.254133	161.6161484	163.789481	145.9904536	166.0787874	165.6824141	162.2933868	160.9894759
ENSMUSG00000013701	21.9301578	22.89536999	20.14798101	26.31772496	20.84383979	24.98152272	26.93653624	24.5238216	25.87659031	26.66018913	29.19331433	27.10404791
ENSMUSG00000013707	1.26129	1.427448	2.023591	1.538125	2.568058	2.678242	0.857864	1.592899	0.927303	1.190433	1.410058	1.224253
ENSMUSG00000013736	5.85532439	5.41514892	4.967833152	6.143901303	5.892181617	5.574606453	3.93845902	4.186660949	5.312989926	4.792383334	4.323308258	5.96012084
ENSMUSG00000013766	3.509810441	1.894459537	1.30256168	1.679350327	1.382523464	1.635543712	0.736349514	1.153286116	1.922038203	0.375785668	1.469489699	1.205698094
ENSMUSG00000013787	28.43843248	27.13173403	32.40505059	31.83153894	30.95471939	32.01770876	35.39698021	39.30870575	35.36762578	33.80946158	33.35105622	34.42080011
ENSMUSG00000013822	14.1739475	13.65540852	11.51281305	14.18694151	13.30823294	13.15885061	16.76346068	20.01556057	18.77316803	15.91549174	18.34810065	16.62850886
ENSMUSG00000013833	12.28955824	10.4217419	12.81339828	13.27318886	10.68780169	11.73081718	11.95766257	12.40083509	11.65457467	11.53313137	11.63600853	11.72430011
ENSMUSG00000013846	2.733090037	3.399674568	2.612895012	4.828844149	3.447868161	3.608861883	4.684382801	5.042804455	4.418408751	3.446039504	3.469845182	3.779587057
ENSMUSG00000013858	19.08427186	16.71585915	18.5207117	17.18390244	17.10847658	15.18949732	16.92310044	17.94739	17.95943664	17.39028948	18.4294158	17.91065711
ENSMUSG00000013878	3.500159956	3.407530627	0.730401811	0.813207198	0.814511552	0.688328722	0.429840776	0.249566281	0.498882948	0.543481883	1.955785169	0.378791565
ENSMUSG00000013921	101.0760058	93.45938111	103.1033138	106.0150639	102.7720129	99.92140907	130.3873793	126.5688513	127.4006978	124.6505075	126.3665627	125.9888507
ENSMUSG00000013928	0	0.092324077	0.024307887	0.053849118	0	0	0.135749026	0.058420079	0.071668026	0.038123145	0.015777092	0.047991434
ENSMUSG00000013936	0.051138311	0	0.080843836	0	0.180089517	0.185222498	0.067133169	0	0	0.189709847	0.039091367	0.048351168
ENSMUSG00000013973	3.158033277	3.285447356	3.156188242	3.443781206	1.896818551	4.199189898	5.022443398	3.966575469	3.848895728	4.34287672	4.295497414	3.889217227
ENSMUSG00000013974	0.046549	0	0.087669	0.05688	0	0.05794	0.023808	0.047152	0.046666	0.060817	0.415772	0.096872
ENSMUSG00000013997	4.831307557	3.802382844	3.492786647	5.217370693	5.0331535	5.14937754	5.30393807	5.528315712	4.931409237	5.834733716	5.283123439	5.084259049
ENSMUSG00000014030	0.063127592	0.065389055	0.013799202	0.049276179	0.03035788	0.023273452	0.1659892	0.111293783	0.138733244	0.11931113	0.154351757	0.08840322
ENSMUSG00000014039	1.179365684	1.545996204	1.257915693	1.370817524	1.559108128	1.411405225	1.208440705	1.408902533	1.409727196	1.299592077	1.17691773	1.290387448
ENSMUSG00000014074	6.503231193	7.271575817	7.027315866	8.058096646	7.472062802	7.335196082	7.483596651	6.965711253	8.243542309	8.092552832	7.09326906	7.508647219
ENSMUSG00000014075	2.513439468	3.313134231	1.455528025	2.115023938	2.401210032	2.278496121	2.324129425	2.323813704	2.482636662	2.491460982	2.991981171	2.227301571
ENSMUSG00000014077	16.15714604	14.84853289	14.53994807	17.20983859	14.61952617	16.35350484	12.62137347	11.04086085	12.9127331	10.84067664	10.65657126	12.05706914
ENSMUSG00000014104	0	0	0	0	0	0	0	0	0	0	0	0
ENSMUSG00000014158	3.694971648	5.438829927	0.118428636	4.37625867	3.481867312	2.8228814	0.223111345	0.16544002	0.157979555	1.68537682	1.352918495	0.171236055
ENSMUSG00000014164	10.70290244	11.30263735	12.0981164	13.73655802	13.03671898	12.70631604	7.181179287	6.117833395	7.724595066	6.295332071	5.697919106	5.997665851
ENSMUSG00000014177	8.774945749	9.328956005	8.061316338	8.932656559	8.514807171	9.417416543	7.794450858	7.60034515	7.77095264	6.945433585	6.221961513	6.696682014
ENSMUSG00000014195	21.30911611	22.1144435	19.80934943	21.18039077	22.25229129	22.94600706	27.55350486	26.69035715	28.57029661	29.52546694	25.59302182	30.16451108
ENSMUSG00000014198	0	0.049780864	0.068660308	0	0.07516457	0.06752929	0.049952123	0.124755431	0.103411472	0	0	0.159630579
ENSMUSG00000014226	27.40001266	28.31187346	22.44498529	27.27405248	27.38377511	26.89769946	27.6559923	30.33969981	34.82669628	32.34879643	30.62508058	37.96335555
ENSMUSG00000014232	7.484395479	8.028298162	8.502179956	7.580447234	7.452536139	8.782192838	8.262273612	9.731224981	9.662993661	8.389155054	9.857380405	9.590549843
ENSMUSG00000014243	9.071934	7.502728	6.857669	8.478678	6.468006	7.563279	7.631786	7.222978	7.382154	6.326479	8.383158	4.772085
ENSMUSG00000014245	1.63180555	2.351408384	1.930824489	1.672763595	1.95701122	2.407461527	2.469205811	1.787497377	2.539750578	2.135631009	1.747954472	2.027426581
ENSMUSG00000014294	74.110794	78.116684	69.009674	53.288048	59.820076	64.784676	61.20023	67.251884	55.703407	56.747704	52.640537	50.738388
ENSMUSG00000014301	6.753915662	6.225512759	6.430952191	6.996787632	6.494772494	8.2236172	6.624554005	6.966158234	6.001022857	6.252137486	4.840491382	6.092185311
ENSMUSG00000014303	0.989926164	1.338532532	0.963024412	0.962470437	1.013501585	0.970230493	1.638695893	1.705347515	1.951573617	1.923858652	1.621742449	1.835260478
ENSMUSG00000014313	28.32516094	31.63269563	28.46923623	26.03748121	28.05067004	31.35900811	23.21123571	27.37280122	23.2760252	22.41352242	18.2715118	20.04221902
ENSMUSG00000014329	0.69194958	1.229751669	0.898229461	0.978300688	1.105538967	0.99221154	0.986660984	0.700313765	1.311920668	1.102779065	1.045400049	1.051518676
ENSMUSG00000014349	25.382284	27.874281	25.48702	26.195936	25.148642	25.836918	33.071404	31.176191	31.867363	32.462772	31.105204	34.058609
ENSMUSG00000014351	0	0	0	0	0	0	0	0	0	0	0	0
ENSMUSG00000014353	1.387716141	2.410272312	1.543676625	1.807816457	1.767527667	2.266356764	1.708778959	1.07906545	1.546003842	1.773902704	1.329406998	1.310275694
ENSMUSG00000014355	4.664074466	5.514016591	5.252092054	4.577210685	5.347598905	5.072921066	9.235095614	8.172225045	8.98359096	8.998223831	7.389598134	8.132897459
ENSMUSG00000014361	4.486029559	6.515235498	4.6170963	8.565294898	10.08336687	9.030330581	1.753530322	1.459348331	1.950974859	3.026796318	2.432560741	2.657650896
ENSMUSG00000014402	21.02782582	18.07878797	21.45807632	21.21522209	19.26522849	21.31629069	24.95635539	25.36187127	25.86886762	26.8337415	24.24103325	26.92996885
ENSMUSG00000014418	1.476484951	1.699021504	1.231933579	1.617737711	1.819112455	1.423256711	1.477801404	1.065455649	1.347303308	1.614761544	1.20975065	1.489873419
ENSMUSG00000014426	8.178808	8.344339	8.73447	8.43925	9.228715	8.15053	6.281278	6.323672	6.534475	6.29734	5.402839	5.60748
ENSMUSG00000014444	0.793632378	1.229152811	0.703557366	1.212588105	1.137536426	1.081779543	2.187508474	2.40586144	2.399318269	2.588670034	2.591260387	2.5271349
ENSMUSG00000014453	0.025776529	0	0	0	0	0	0.053740256	0	0	0	0	0
ENSMUSG00000014470	13.01682844	13.30757603	12.99671532	14.57121471	14.71273493	13.30074743	7.161149741	7.385169994	7.835951772	7.550665501	10.71014912	9.762170194
ENSMUSG00000014496	4.514055469	4.928802154	4.219173797	3.424552877	4.188619669	4.300128201	4.804991495	4.252982944	4.947901236	5.296440708	4.488021728	5.22897584
ENSMUSG00000014498	7.66193049	9.454310163	9.362803624	10.94626433	10.1976396	9.926997681	17.66086953	15.46930493	18.87438165	18.93267505	15.18447514	17.59737404
ENSMUSG00000014503	3.534281547	3.537098164	3.378662264	3.751418051	3.709625843	3.595005962	4.960784601	4.333336121	4.093587715	3.213081339	3.64436018	4.139511229
ENSMUSG00000014504	6.904942926	6.959690163	6.219803799	5.543764225	6.225699428	5.796977652	6.141881293	6.59873312	6.79572461	6.315387975	6.877018055	6.509220974
ENSMUSG00000014529	0	0	0	0	0	0	0.057830763	0	0.013180418	0	0	0
ENSMUSG00000014542	0	0	0	0	0	0	0	0	0	0	0	0
ENSMUSG00000014543	0	0	0	0	0	0	0	0	0	0	0	0
ENSMUSG00000014547	2.415491247	2.87096259	2.429092761	2.629615564	3.356155876	2.924931512	2.183917056	2.435889941	2.699329275	2.793446198	2.186097581	2.488867662
ENSMUSG00000014550	5.332413907	6.037187189	6.022764928	5.415683149	5.199031021	6.475525641	5.294610367	4.917415973	5.884320615	5.849636011	5.387342064	5.502961334
ENSMUSG00000014551	13.83486361	13.47235399	13.6007023	13.43434984	12.77061888	14.12824178	14.21519114	13.44801737	14.34551879	14.07811662	13.20040923	15.0098099
ENSMUSG00000014554	2.269765461	1.898781779	2.105093038	1.842052516	1.979556275	1.718866066	2.435563117	2.346841702	1.99751784	1.633631524	1.629605847	1.759906308
ENSMUSG00000014592	16.81444722	16.9625687	19.10927324	20.70825377	18.00556485	19.27899216	15.40008751	13.11876434	17.963943	15.62180397	14.09407844	14.93394027
ENSMUSG00000014599	3.942188593	4.356152721	3.301923359	4.660159078	3.922978188	4.246618516	2.859323539	2.115371826	2.668512689	2.486502907	2.764397885	2.711812416
ENSMUSG00000014601	16.96870184	16.5843165	18.25912497	15.36537958	15.62146276	15.07855396	27.57436968	27.55378334	26.19473352	26.70738574	26.73698143	27.36360862
ENSMUSG00000014602	90.58769088	102.2884114	100.220417	108.0062802	106.6046266	103.8196346	150.2674244	132.2722248	147.8437429	149.5736396	129.2842212	131.9415825
ENSMUSG00000014603	0.104356	0.595983	0.043213	0.604101	0.143413	0.194198	0.333414	0.682715	0.214866	0.405692	0.523062	0.415072
ENSMUSG00000014606	48.13068399	46.9641956	48.27119786	46.18955494	47.11168878	47.25863092	41.73021477	39.91451726	39.77613962	39.42087589	39.08845975	35.65075753
ENSMUSG00000014609	0.041847707	0	0	0	0.209084582	0	0.164458121	0.144564264	0.040429212	0	0.119101783	0
ENSMUSG00000014633	2.574269879	1.896251314	2.129341294	2.360175219	2.671536779	1.592309135	1.989921661	2.060143355	1.707684226	1.84540971	1.387733161	1.305667512
ENSMUSG00000014668	3.374490072	4.180352367	3.98038509	4.201651286	4.376016178	4.222418383	10.23099799	10.6054136	10.6275809	9.209541608	8.074859431	9.436129575
ENSMUSG00000014686	0.148147	0.401079	0.084822	0.240025	0.343597	0.323003	1.486089	1.723764	1.22088	1.145082	0.996896	1.242152
ENSMUSG00000014704	0	0	0	0	0	0	0	0	0	0	0	0
ENSMUSG00000014725	0	0.010790091	0	0	0	0	0	0	0.007515348	0	0	0
ENSMUSG00000014747	0.135486	0	0.117586	0.100411	0.051908	0.0806	0.036103	0.025816	0.11826	0	0	0.174671
ENSMUSG00000014748	11.22440012	11.22685018	10.91684903	11.13300854	11.07896903	10.90483584	13.22224575	13.48074615	11.9365908	13.14948995	11.80975519	10.86414537
ENSMUSG00000014763	12.59547	13.032536	12.915767	12.74502	13.704139	13.66156	11.868757	10.640799	11.997355	9.415538	9.542495	10.176529
ENSMUSG00000014767	1.406616917	1.517946925	1.488387988	1.720509734	1.619080119	1.787317559	1.722403436	1.588856911	1.86852854	1.911128531	1.51076661	2.085586537
ENSMUSG00000014769	110.702423	104.081116	100.573929	100.963974	93.243347	98.567741	103.002327	120.699455	116.695	106.073578	113.259048	111.368027
ENSMUSG00000014771	3.29415016	3.20633488	3.752320715	3.639624655	3.627404333	3.419037597	4.125728216	2.972914246	3.086850762	3.731512299	2.839721031	3.798544863
ENSMUSG00000014773	1.151082066	1.339297463	1.209425489	1.478464809	1.748296158	1.490404794	4.836626577	5.008089368	4.288557937	4.868365511	4.831915005	5.021859717
ENSMUSG00000014776	8.536569	7.716351	7.849013	8.736972	8.606502	9.756745	17.43461	20.193106	17.640612	15.751217	17.313896	19.032505
ENSMUSG00000014778	0.661567784	0.620746052	0.807087919	0.502424474	0.661420145	0.493622351	0.65707772	0.541340057	0.590455937	0.455666562	0.76277255	0.759436436
ENSMUSG00000014782	0.081150859	0	0.058837307	0.015937495	0.096725823	0.033098668	0.121451352	0.124067173	0.012727401	0.142146152	0.173531256	0.078028144
ENSMUSG00000014786	2.332675236	2.458317902	2.066229866	1.820781736	1.980982475	1.91626355	1.308164074	1.029105712	1.339066525	1.22611592	1.745432096	1.516591442
ENSMUSG00000014791	0.806994269	1.037059166	0.390785728	0.596929072	0.923755931	0.856250218	0.229329161	0.111526657	0.192068778	0.611193583	0.181303679	0.460181169
ENSMUSG00000014813	0.807268	1.100433	0.710459	1.355064	0.989486	1.05898	1.335442	1.675255	1.582083	1.18606	1.409236	1.579938
ENSMUSG00000014837	4.406738327	4.010110113	4.594136837	4.290050521	4.344784928	4.569682916	22.12071436	21.95625555	20.12208729	21.2992339	20.29253476	24.26929806
ENSMUSG00000014846	13.20467776	14.82449282	7.982248269	7.58547915	13.26472159	14.69537184	18.27127181	21.34062498	15.42009515	14.76122425	10.33260102	15.13793174
ENSMUSG00000014850	1.652544319	1.531479611	1.547560254	1.505474034	1.62706787	1.332203229	1.723283332	1.594291733	2.027226918	1.742205947	1.54718845	1.989249616
ENSMUSG00000014852	0.184359001	0.100968696	0.218913261	0.233957561	0.17098306	0.110778752	0.204960581	0.142225103	0.258137811	0.069624645	0.299068198	0.205013649
ENSMUSG00000014856	9.725867749	10.40542921	8.410318569	7.961145473	5.347383171	9.536962878	9.671061405	10.58290113	11.96356245	12.1877729	10.04544531	11.12756418
ENSMUSG00000014859	11.73101391	11.88397292	13.11098278	11.87223481	12.11502026	10.47749877	12.29084465	11.13627237	12.04295708	9.762985415	10.61531196	11.53706013
ENSMUSG00000014867	24.64037629	25.420124	23.22879875	25.76734926	26.523077	25.823246	32.68018825	33.422714	31.005426	33.68868295	33.53913821	33.78286992
ENSMUSG00000014873	4.995454952	3.680638276	4.059966669	4.752652588	3.949789544	4.225417563	5.315636338	4.289248912	4.723523303	4.545282661	4.848971341	4.539782926
ENSMUSG00000014905	15.24988821	16.66253214	15.44622851	13.93927199	13.98874784	17.7867638	9.700568788	10.52128477	11.10274019	10.28975671	10.10046632	9.410810899
ENSMUSG00000014907	4.351727563	5.406496933	4.837350336	3.988985672	4.827536681	5.595705897	5.488084926	4.286529328	4.670480504	5.438568403	4.768022731	4.802581681
ENSMUSG00000014932	1.084154191	1.424485162	0.958746406	1.363290464	1.388989097	1.459363043	1.957432355	1.437590517	2.088539572	1.598914065	1.354409723	1.690832771
ENSMUSG00000014956	22.97353352	23.69962769	25.13826404	23.36779977	23.81763751	23.48442242	20.63140229	21.20286311	23.35136841	21.0782298	20.75153103	23.37225143
ENSMUSG00000014959	25.49112944	20.76542954	23.682006	22.19845442	25.12178282	24.32822623	26.5316622	24.33943724	23.90293434	24.12156941	24.384685	25.15743229
ENSMUSG00000014980	3.239249805	2.254486774	3.101795993	2.764609903	2.56157196	2.865014123	1.978002215	2.088364902	2.251803065	1.674452	2.044905416	2.086354962
ENSMUSG00000015001	0.073978432	0.118965046	0	0	0	0	0	0	0	0	0	0
ENSMUSG00000015002	10.6031666	10.87099637	10.9068845	12.80175918	11.44375716	11.78156362	4.18879441	3.474106205	3.947010501	4.343001375	3.809955682	3.600263515
ENSMUSG00000015013	15.2875425	12.46472717	13.09895251	12.32228404	11.49732498	11.98941718	13.92735942	14.27904067	14.17807375	13.18737958	13.06024612	13.89220784
ENSMUSG00000015016	3.503127539	3.024489951	2.929260754	3.389558751	3.274969031	3.215730435	2.802329801	2.649591765	2.636001286	2.189892716	2.417402898	2.754482794
ENSMUSG00000015023	7.559205821	7.887783151	7.704549518	7.611241193	7.648935631	7.37403584	11.32582264	11.28508378	11.33140344	12.82354659	9.941696456	11.11651868
ENSMUSG00000015027	3.771093512	3.177511127	2.860554496	2.68280826	2.739168399	3.320482228	2.502955064	3.270905376	2.861620804	2.587811624	2.907218274	2.298716511
ENSMUSG00000015053	0.764703154	1.083664701	0.937040802	0.910058786	1.220248719	0.922238163	0.499197634	0.456277738	0.529016364	0.484875091	0.674757657	0.59472445
ENSMUSG00000015083	0.291024458	0.501304587	0.44998612	0.343731429	0.213320162	0.484771425	0.326689775	0.579437416	0.351291839	0.52956522	0.853163168	0.182417708
ENSMUSG00000015085	4.936534912	3.359202273	4.679514542	3.027468136	3.440953593	3.410813869	6.777636915	6.947783649	6.18763149	6.939922804	6.345678722	5.986433256
ENSMUSG00000015087	18.75314239	19.60222629	21.67692848	18.92644535	18.46102058	18.95994243	11.40948204	11.05787179	10.75317792	10.59760485	10.6539837	10.80798795
ENSMUSG00000015090	186.7428778	308.9948343	124.8896613	247.4609102	217.6444567	154.7438509	134.3111026	73.60943535	162.5919936	41.21731055	87.29015983	79.67006665
ENSMUSG00000015092	57.13500013	44.60902642	56.01238706	49.84386785	43.33595324	52.33833055	50.5085352	50.42678711	49.03368269	48.77368437	52.17609879	51.75816413
ENSMUSG00000015093	1.334936595	2.348761174	0.630722488	1.038029447	1.3043013	0.982634243	0.165944828	0.312509992	0	0.287082955	0.151242314	0.135301393
ENSMUSG00000015094	40.93329566	34.70851377	44.02172519	37.66387188	37.49797431	41.29121617	40.24543392	41.74558727	34.11172805	38.37339218	39.6706256	41.35834758
ENSMUSG00000015095	22.9594767	20.81103651	24.1379892	20.75520999	21.99521256	19.36335068	26.85999491	27.87654172	25.6863574	28.50008953	26.9843709	24.75062283
ENSMUSG00000015112	0.633776372	1.05937124	0.311991685	1.090308226	0.898604698	0.582329424	0.217114937	0.223742399	0.271072326	0.455602725	0.466740702	0.254723891
ENSMUSG00000015120	12.65118311	12.79027404	12.51267685	13.39911137	12.44796038	12.55536661	14.83446743	15.67038373	15.99941348	14.99845131	14.00567995	15.20893725
ENSMUSG00000015126	10.901484	9.920353	10.650082	10.87241	10.527019	11.008849	12.870003	14.165284	11.028255	12.949053	12.920706	13.454491
ENSMUSG00000015127	6.322770875	6.525974169	6.441963181	7.577015637	7.204080228	7.196706825	6.874824842	6.193423117	7.274788174	5.910951181	6.080286957	6.531281572
ENSMUSG00000015133	0.41730203	0.39357349	0.299963192	0.546557029	0.472206275	0.395346281	0.578177814	0.415975537	0.462445812	0.447391013	0.352939455	0.56828115
ENSMUSG00000015134	0.128076319	0.131080834	0.07544622	0.194149554	0.234769481	0.170849399	0.140683636	0.109755151	0.172881554	0.162740476	0.158049136	0.181793681
ENSMUSG00000015143	10.77072533	11.38889722	11.6406056	10.85369562	11.6030097	10.61636439	7.769309183	6.52499023	7.328387331	7.646799569	6.653334704	6.509659581
ENSMUSG00000015149	21.29058822	22.19234083	18.26263558	16.5612535	29.80450037	27.70695982	16.70008633	15.21740924	13.17763855	17.31410092	13.10752106	16.43442415
ENSMUSG00000015165	19.03531072	17.28461287	19.53332819	17.71473988	18.65214841	18.22254607	26.34281803	27.19429139	25.35179556	25.35365024	26.39968476	26.03058617
ENSMUSG00000015176	12.64774522	11.21285057	13.12710634	12.97367424	13.53954388	12.96751049	13.35491547	12.15333223	12.69551438	12.27273932	12.35490905	14.60910477
ENSMUSG00000015189	13.47218891	17.24390328	14.41573718	15.54562209	16.44707476	13.69669553	17.0341554	13.52673016	17.24829077	15.11666837	14.57308023	14.54859994
ENSMUSG00000015202	2.455153646	2.915792243	1.715602812	2.37772592	2.668023473	2.667783169	0.897525114	0.885246039	0.794728987	1.836348338	1.854186644	1.047611214
ENSMUSG00000015214	7.03886592	7.970452536	7.274956595	7.66016345	8.740544368	8.460446842	3.807324531	3.228459851	3.785606188	4.188605315	3.630113571	3.210837345
ENSMUSG00000015217	5.655708838	6.153919325	4.749675405	5.952760715	6.022619152	5.580983978	23.44565504	18.81707732	22.39308845	22.05115474	20.22679786	27.79646601
ENSMUSG00000015222	19.36425288	27.25649329	24.72951143	27.11783944	28.256906	26.72683483	28.18286492	26.69722863	36.60600556	35.85155016	27.34405394	32.32493414
ENSMUSG00000015224	5.35124176	5.280501029	5.314357521	5.668091736	5.752838076	6.289198503	1.84996794	1.651912681	1.971531297	1.421433454	1.921667818	1.631833213
ENSMUSG00000015242	0	0	0	0	0	0	0	0	0	0	0	0
ENSMUSG00000015243	2.85305466	3.776165001	3.195053005	4.156335387	3.794052752	3.692940601	7.092380313	6.11518563	7.663610351	7.642355412	6.322620108	8.071779431
ENSMUSG00000015247	7.411448823	7.743785472	6.080781333	6.79179016	6.727833126	7.606538807	20.88633706	23.92097875	20.05573564	17.74765078	22.63154561	24.38458081
ENSMUSG00000015289	5.258648282	6.107269002	5.441546405	4.081724768	4.297560282	4.017617694	7.207397629	7.88956966	6.348550857	7.104992619	8.241615915	5.786109993
ENSMUSG00000015290	16.59775601	14.41466238	20.41946878	16.47855228	16.62917144	19.20021034	14.1165417	16.03354397	13.67749233	16.1854194	15.23144493	16.97216666
ENSMUSG00000015291	93.58346913	114.4612766	126.9615541	121.2960304	114.422766	118.9100164	110.3379694	104.535393	143.9676958	141.1843879	146.3427345	151.6309266
ENSMUSG00000015305	7.665141936	9.362231053	10.02511648	9.62618929	9.379947905	9.55932053	11.92694806	9.943968008	11.61189494	12.55844336	10.44249953	10.4710871
ENSMUSG00000015312	4.754637336	3.941120916	3.944637887	11.99178111	11.55600713	11.07186578	3.60379313	2.793842239	2.760665113	4.709857395	3.790618356	2.462030529
ENSMUSG00000015314	0.01954363	0.00705439	0.011039623	0	0.014170065	0.058461129	0.003611301	0	0.019287639	0.008559122	0	0.007183464
ENSMUSG00000015316	0.011488558	0	0	0.030634133	0	0	0.050833208	0.023118122	0.044093411	0	0	0
ENSMUSG00000015335	3.21891209	3.084243376	2.130626885	3.102393699	2.88738706	3.710286765	3.350346778	4.422871798	5.076636956	3.92308273	5.180907602	4.365740601
ENSMUSG00000015337	17.956861	16.918457	17.365326	16.59758	14.047099	13.474408	14.423864	13.987339	13.464071	12.511064	11.379651	14.585477
ENSMUSG00000015340	0.048585234	0.164435727	0.120933818	0.271011273	0.077071091	0.047178818	0.086656091	0.024340091	0.233835961	0.063587455	0.129264088	0.066271105
ENSMUSG00000015341	10.88992439	11.23554039	11.72715117	10.15873741	13.56960908	13.04464177	8.346190394	9.686385385	9.742467637	8.906201221	10.00428621	8.706718535
ENSMUSG00000015342	3.346293	4.315092	4.867224	4.664537	3.918678	4.646102	3.144053	3.109554	3.688889	3.015932	3.126422	3.287421
ENSMUSG00000015354	1.972344116	3.184599409	0.518443802	2.721348015	2.618406566	2.249561267	0.611371203	0.583001588	0.570687458	1.177803939	1.115445481	0.357002316
ENSMUSG00000015355	0.414413023	0.693521729	0.200241487	0.50984386	0.373711314	0.072263209	0.131593781	0.239385472	0.289272727	0	0	0.455911766
ENSMUSG00000015357	8.086370018	8.068529089	6.872403533	6.093892873	6.218104362	7.490933141	5.267014048	4.62358196	5.340174022	5.701496755	5.75810545	6.024659013
ENSMUSG00000015363	3.524165891	3.378466237	2.868432327	3.8390948	3.776476875	3.597244037	4.363993506	4.037687003	4.653885318	4.642929924	3.828060014	4.027204059
ENSMUSG00000015365	0.012004769	0.02219252	0.011044388	0	0	0	0.018702739	0.034135043	0.007000312	0.055010497	0.053935502	0.01860097
ENSMUSG00000015377	3.334094608	3.175496882	3.553869761	3.182130636	3.766158108	3.122132391	2.043057852	2.603037449	1.724575522	1.841978679	2.226800919	2.146271045
ENSMUSG00000015396	4.077297462	4.086642465	5.447613285	3.6591376	4.344582809	4.041514418	5.777215516	6.548936455	5.691761212	5.493035127	5.717368641	5.607871804
ENSMUSG00000015401	0.114207466	0.777352767	0	0.504769758	0.492796288	0.295123817	0	0	0	0.05944812	0	0
ENSMUSG00000015405	0.437460432	0.354681376	0.171350249	0.653684051	0.327908197	0.236011043	0.10231349	0.132088309	0.170929867	0.098416875	0.121218303	0.123479044
ENSMUSG00000015437	0.04925	0.05375	0	0	0.12477	0	0	0	0	0	0	0
ENSMUSG00000015441	0	0	0	0	0	0	0	0	0	0	0	0
ENSMUSG00000015443	0	0	0	0	0	0	0	0	0	0	0	0
ENSMUSG00000015451	0.060861236	0.120639381	0.076603823	0.105704673	0.246991895	0.06809849	0.063576162	0	0.01602732	0.014790588	0.060917267	0.059290473
ENSMUSG00000015452	0.248818153	0.099364353	0.2052576	0.11519744	0.062624753	0	0.24067827	0	0	0.085165859	0.104451806	0
ENSMUSG00000015461	33.77420916	29.63255002	33.28562703	26.93452833	27.48649857	30.52681359	32.42403695	33.1860315	30.79861924	31.51877941	34.02277833	28.92958064
ENSMUSG00000015467	0.929485422	0.834334277	0.710622495	0.246694528	1.030805288	0.68138714	1.890555686	1.287775386	1.316068905	1.209004945	1.260486637	1.230090244
ENSMUSG00000015468	0.819807885	1.047560231	0.619541638	1.220180432	1.449250142	1.224083865	1.01026342	0.820782369	0.827277838	0.856088218	0.766632684	0.743290297
ENSMUSG00000015474	7.059161249	8.437122644	8.096697486	7.371241538	9.361149889	6.299104902	6.85605953	5.409050372	5.503560114	5.541109312	5.570065433	5.316843242
ENSMUSG00000015476	96.51458047	80.41112059	105.2121863	89.17747822	87.1412095	82.12994159	48.81645182	46.81691643	47.98795222	59.64018698	63.03296483	59.94351128
ENSMUSG00000015478	32.07732108	30.74700988	34.31875558	32.82111266	26.80227691	32.89866456	38.2056608	42.22411632	33.17902428	39.87048971	41.52800745	38.58511389
ENSMUSG00000015484	2.627731	2.937034	3.33462	3.833924	3.901566	3.691318	10.018434	8.934339	11.177253	9.207194	9.003148	10.245431
ENSMUSG00000015488	8.011307886	8.19783846	8.432330485	8.578393118	7.640530008	8.731405603	11.09074585	12.10380105	11.13039098	11.09779941	10.5845192	10.89703923
ENSMUSG00000015501	12.6301059	12.4073778	15.2964259	14.4295944	14.91209567	13.91785987	20.1244631	14.7770428	17.91597325	18.11454019	15.75689842	16.62197616
ENSMUSG00000015519	0	0	0	0	0	0	0	0	0.075046674	0	0	0
ENSMUSG00000015522	1.607623755	2.013456387	1.425864292	1.528766149	1.717921736	1.528344121	1.735519226	1.248135884	1.554447674	1.977372326	1.686904534	1.795808215
ENSMUSG00000015533	0.019730604	0.048531307	0.022706139	0	0.025076801	0.089562992	0.082075328	0.165444106	0.272990846	0.077685766	0.08581617	0.09995843
ENSMUSG00000015536	4.412605921	3.544523042	3.525403902	3.196184328	3.036694131	4.437098719	4.102677226	3.963617782	3.808690505	4.291383102	3.455673013	3.77061203
ENSMUSG00000015542	3.848900485	4.278517468	3.323754589	2.930325619	3.529381252	3.792897524	3.129600445	3.340821093	2.849251629	3.119332721	2.697041412	3.38983644
ENSMUSG00000015568	4.077436178	3.354682707	4.125052418	2.946610762	3.583092356	3.767129527	21.52566287	20.64285965	23.53620071	24.44587358	20.1374219	25.29092557
ENSMUSG00000015575	7.457399345	8.694420442	5.43097272	6.633729857	7.477645626	7.12275842	4.604239034	5.499392336	5.158950373	6.673893943	6.197719554	5.320740482
ENSMUSG00000015579	0	0	0	0	0	0	0	0	0	0	0	0
ENSMUSG00000015597	4.235893074	4.847644691	4.173059566	4.341751883	4.034241147	4.48969878	7.081731748	6.072788625	7.619441482	7.419464524	6.358227978	7.093523892
ENSMUSG00000015599	10.08897222	10.92298489	12.32246506	13.14378549	12.15578795	11.63364226	12.96560002	11.33041697	12.32147079	14.33266819	12.1928195	12.27875923
ENSMUSG00000015605	15.048046	15.334763	16.760845	18.433258	18.35582	17.628244	11.125301	10.289894	9.515496	12.676062	12.499488	12.352261
ENSMUSG00000015619	0	0.077288503	0	0.073816497	0	0.022985876	0	0.024787343	0	0	0.06738973	0.019559937
ENSMUSG00000015627	0	0	0	0	0	0	0	0	0	0	0	0
ENSMUSG00000015647	1.340797877	1.871619724	0.824552451	1.622139598	1.499457	1.220854729	0.925901643	0.571637068	0.868033	1.388166507	1.310041167	0.798486572
ENSMUSG00000015652	2.605161438	5.741351481	0.191330654	5.000044684	4.578367277	4.107336231	0	0	0.253154009	1.879222048	0.987897233	0.056318279
ENSMUSG00000015653	1.053307736	2.254232187	0.551205996	2.084061281	1.555889832	1.540801	0.542033994	0.465000306	0.449731672	1.018922554	0.590971292	0.521967
ENSMUSG00000015656	353.4067092	333.469497	336.2945163	296.5483751	243.7691477	276.2887519	414.9151385	360.566969	278.4906279	374.2770828	275.6710228	372.1857037
ENSMUSG00000015659	3.275169603	2.677797405	2.783167903	2.738843888	3.861130487	3.587541753	2.675392146	2.294755456	2.652015674	2.383899288	2.097779617	2.457699976
ENSMUSG00000015665	0	0	0	0	0	0	0	0	0	0	0	0
ENSMUSG00000015668	11.71763121	11.35304704	9.725755391	10.63033702	10.55652848	11.13870458	9.957075821	9.116526528	9.579590495	9.11538777	9.151546371	9.636694402
ENSMUSG00000015671	20.982637	20.08497511	21.52661041	18.47116759	19.62356377	19.80018769	22.2702548	21.70270887	21.93176169	22.13282507	22.84619532	23.64640964
ENSMUSG00000015672	1.982115041	2.645503223	2.43777143	2.390552308	2.927706871	2.96461449	3.894046738	2.969962125	2.872039719	3.37592674	3.65607512	3.070137508
ENSMUSG00000015697	4.737065572	4.108742886	4.612445338	3.816724549	4.346723189	4.927397913	8.988489866	8.701498898	8.695793255	7.418422676	6.584663638	7.500876378
ENSMUSG00000015702	0.300837534	0.325220637	0	0.170926507	0.128421187	0.08821879	0.230081851	0.300324444	0.033519907	0.059679939	0.156272718	0.110855271
ENSMUSG00000015709	31.79013949	32.46046568	30.19291691	35.6444699	32.25445376	33.23038521	48.6858882	45.49636626	47.71857512	50.25563904	48.96239445	49.95974319
ENSMUSG00000015711	8.799262443	7.23212906	8.431087646	7.327740238	7.946694893	7.799672344	20.52300095	20.99594262	19.31207791	20.2530003	20.1586542	21.32385022
ENSMUSG00000015714	22.04955767	20.68608532	15.81868651	11.88822607	20.26056023	17.09762114	8.295501174	7.960968354	9.336066567	8.846421516	8.160987073	8.585863276
ENSMUSG00000015721	0	0	0	0	0	0	0	0	0	0	0	0.003772891
ENSMUSG00000015733	41.90642086	42.46188628	43.58785141	40.5826934	39.81213783	41.06247612	30.90402183	29.42726528	35.12941976	32.86515375	31.98946995	28.73631089
ENSMUSG00000015745	5.851035106	6.61431874	7.907991127	6.861490866	7.406038152	6.434499227	9.829184402	10.70193471	9.563443684	9.936625506	8.778451999	10.68199087
ENSMUSG00000015747	9.398342804	8.542433053	8.728387967	8.345979855	8.052820873	9.361934464	9.926492688	10.12272519	9.690650695	8.953774597	8.488624517	8.812185145
ENSMUSG00000015748	2.666902971	2.423804465	2.170693026	2.550797312	3.020593931	2.677366769	2.378098948	2.382769056	2.51948083	1.898972243	2.230880203	2.716445925
ENSMUSG00000015749	9.780559027	14.92643809	11.69434484	22.51593326	13.80271826	21.98097453	19.84030667	16.93520378	31.87622762	16.24488796	15.72136372	18.85875523
ENSMUSG00000015750	11.00759956	11.24547156	9.42068961	8.712411043	9.536360839	10.4521142	10.94693704	11.26472083	12.23581341	14.60329253	11.75109285	12.47879707
ENSMUSG00000015755	9.053575966	9.576661992	9.862515616	10.2579224	10.03639506	9.985311586	13.42922431	11.97971107	13.82665177	12.33465894	11.98490945	13.41475155
ENSMUSG00000015757	4.257909806	4.461362779	4.477639347	5.0999118	5.258120306	5.194449219	3.976843183	4.004733878	4.994764344	4.947832377	4.01751647	4.746842153
ENSMUSG00000015759	30.47676373	31.46048798	30.34300505	32.5319046	31.48562589	32.4147218	35.03076483	32.25773031	35.73794169	35.67709076	38.85372656	35.90272659
ENSMUSG00000015766	3.028342045	3.988659014	2.990083623	3.690471582	3.247551809	3.210585442	4.311759457	4.042785363	4.779355952	3.637530889	3.244197277	3.753803071
ENSMUSG00000015776	8.761928328	8.73126266	9.057109678	8.818082233	8.279423426	9.881000146	10.21932096	11.11304881	10.06083645	12.54291686	11.61908981	11.6378241
ENSMUSG00000015787	0	0	0	0	0	0	0	0	0	0	0	0
ENSMUSG00000015790	14.73801349	17.54458205	17.20105612	16.05287352	14.87481616	15.46966257	14.86339387	15.21801199	13.10518456	15.19501167	12.41315899	13.4661764
ENSMUSG00000015804	6.618442409	6.433776395	10.36350237	4.657445984	5.33662933	10.08443645	7.366171543	5.698464171	5.218580424	4.842018455	8.935479852	5.882944947
ENSMUSG00000015806	49.64088574	89.51025753	79.16324318	61.49145045	89.29832926	94.33054577	32.85345664	21.19457676	33.1108878	21.42219694	33.7233952	22.26898791
ENSMUSG00000015812	0.147809556	0.086142364	0.095992187	0	0	0	0.158911037	0	0.271479773	0.144416265	0	0
ENSMUSG00000015829	13.76473315	19.53015973	16.34145702	17.11628798	18.10805648	15.6160401	7.335788657	4.997974489	9.303940763	10.13216929	6.270305571	6.678078431
ENSMUSG00000015837	119.0058998	107.7542486	116.9750536	120.3305243	115.1567649	125.1907776	81.84905737	75.95949576	78.79775966	81.28507943	82.37386223	80.44088261
ENSMUSG00000015839	4.526881467	4.819951661	3.657637634	4.592609152	5.442532172	4.747950571	3.532356217	2.890652893	3.631332726	4.281536166	3.990006787	4.175098518
ENSMUSG00000015843	2.887010026	2.463413518	2.143541376	2.075815612	1.233080509	2.31868148	2.682231633	3.400698115	3.628485337	2.659767527	2.731372495	3.042971441
ENSMUSG00000015846	6.263514376	7.079744703	5.934416095	9.301259886	7.521449101	7.899907929	3.906496321	3.482430563	4.035127787	4.117113496	4.212377467	4.17576533
ENSMUSG00000015850	0.999129005	1.200436616	0.90511672	0.636649038	1.313068024	1.060434615	0.236977927	0.168429452	0.090677325	0.342033214	0.293163135	0.156621412
ENSMUSG00000015852	11.7218201	11.91104297	11.71650474	10.779013	11.59387952	11.23685305	8.793861088	8.262958796	9.489181604	7.698612561	7.242573647	6.712115437
ENSMUSG00000015854	0	0.03791	0	0	0	0	0	0	0	0.045538	0.037189	0
ENSMUSG00000015869	7.05465836	6.722574239	7.215674308	7.196006537	7.984821115	7.053973468	11.89099741	12.15501592	11.71307499	9.501860549	10.75395296	12.00418131
ENSMUSG00000015879	0.472433664	0.612509919	0.626108221	0.48982418	0.499293524	0.420903159	3.162913918	3.11583907	2.871751708	2.965266946	2.907421801	2.720468916
ENSMUSG00000015880	0.184676515	0.269134627	0.141329083	0.221123431	0.168688355	0.079733927	0.414160259	0.496521476	0.694989501	0.545344886	0.528270668	0.568758395
ENSMUSG00000015882	0.832290796	1.059972546	0.825391601	0.921639566	0.746109661	0.987382022	0.829397105	0.765868177	1.214744806	1.187317754	0.907041103	1.133909931
ENSMUSG00000015889	3.915215574	3.993556551	3.562428447	3.728711092	4.09505614	4.082535933	6.459555384	5.993169235	5.802221534	5.880199585	5.894260386	5.987565877
ENSMUSG00000015890	0.116265	0.183426	0	0.107827	0	0.141025	0.249574	0.33678	0.262854	0.451285	0.40578	0.297216
ENSMUSG00000015932	94.13649	100.503433	92.354546	90.925133	92.187927	92.790787	130.123306	139.420517	127.253304	135.185074	139.289413	150.890823
ENSMUSG00000015937	10.41782744	10.83334515	10.29275798	10.63425509	9.239551738	9.882569881	10.14236747	9.951723901	10.24374963	11.20784103	10.9121764	11.76138475
ENSMUSG00000015942	1.963724057	2.140596023	1.639268477	1.072331913	1.827795204	1.616103243	1.815659138	1.736862883	1.593931771	1.345667448	1.419779342	1.703568771
ENSMUSG00000015943	9.961575086	11.02043548	7.860457344	8.883246177	6.198383043	9.08219962	10.12759193	2.129054074	8.538922632	5.115567518	1.667119174	7.954111425
ENSMUSG00000015944	15.63688138	16.50938594	16.82232558	21.99355201	19.69810527	19.08063393	19.9502024	17.72176481	19.40992841	18.99211387	17.35760948	19.32057367
ENSMUSG00000015947	1.217233	1.018505	1.54916	1.28134	1.275324	1.322903	0.887383	0.485467	0.756609	0.392253	0.527899	0.311362
ENSMUSG00000015950	1.825989972	1.83549863	1.829681241	2.162081877	1.998470983	2.134414895	1.004431544	0.926003933	0.976803956	0.728780193	0.812998964	0.251473107
ENSMUSG00000015957	0.173247755	0.148871528	0.156535425	0.063311869	0.354641613	0.296757925	0.462676301	0.535272736	0.496325203	0.434815776	0.514587021	0.524378469
ENSMUSG00000015961	13.77243122	13.89147534	13.6064353	14.25446063	13.51273194	14.67169542	20.2139219	21.59563141	21.52453899	22.38514082	21.09807961	21.93402251
ENSMUSG00000015962	0	0.198994	0	0	0	0	0	0	0.032806	0.08963	0	0
ENSMUSG00000015966	0.313554117	0.282365175	0.342765084	0.016066138	0.467209847	0.189738428	0.111913904	0.16419994	0.163059103	0.148927065	0.126562046	0.218959646
ENSMUSG00000015968	2.666416645	2.98744272	2.797602246	3.146912326	3.071582626	2.614765789	3.847004711	3.238999435	4.249593222	3.43198579	3.224730778	3.404378749
ENSMUSG00000015970	1.463527124	2.060511271	0.804871871	1.880636981	2.056555636	1.713614799	0.535339582	0.585610553	0.583997914	0.637826394	0.914028897	0.585066905
ENSMUSG00000015971	3.388431781	3.469965599	3.382209167	3.939957724	3.24160296	3.528251632	2.987098218	2.891425671	3.074804123	2.888796713	2.388194611	2.465278733
ENSMUSG00000015980	0.978635029	0.739712149	0.985543997	1.012689481	0.869937781	1.111520839	0.703094758	0.598893859	0.926083023	0.929432445	0.776890254	0.94593823
ENSMUSG00000015981	34.69978873	30.45307192	30.47936287	33.63939366	32.08185417	34.84278104	27.57952125	28.44218416	26.38294832	27.80766113	27.04523226	30.25033081
ENSMUSG00000015994	13.61768674	12.05269524	11.63731211	11.52623116	13.15021385	11.67922019	13.29244677	12.25664943	11.69056298	13.36013729	12.52549945	12.90930333
ENSMUSG00000016018	9.48296042	9.846680995	8.891853338	9.597019134	9.606435757	10.23455958	6.578541161	7.380528844	8.617997196	7.510800456	6.832724034	7.894504686
ENSMUSG00000016024	3.770895155	7.678262264	0.530577285	5.45092642	5.576031576	4.200354794	0.874496948	0.726407324	0.702141008	3.137247104	2.391508194	0.437907862
ENSMUSG00000016028	1.025086733	1.379587053	0.955604015	0.870048592	1.047168116	1.016770587	2.300712111	1.928775013	2.569082535	2.928368321	2.366838829	2.68058727
ENSMUSG00000016087	0.935814964	0.891049091	0.981651145	1.157670759	0.781750687	0.86675659	1.462618373	1.377353578	1.322840816	1.423447699	1.235037458	2.27895488
ENSMUSG00000016128	2.438160928	3.241954191	1.984158247	2.386064028	2.888256334	2.541583846	1.201046354	1.013907679	1.268593733	1.581759722	1.444155465	1.122557358
ENSMUSG00000016150	2.165369478	3.187704396	2.39712675	3.052011456	2.534158454	2.570464873	3.226703055	2.497715331	3.82666907	3.730815899	2.86349663	3.16414779
ENSMUSG00000016179	9.877580435	8.983886293	10.24842147	10.8977603	10.70736696	11.39105364	12.71520567	12.02937318	12.85084195	11.23512678	11.76604059	13.91759052
ENSMUSG00000016181	1.99040027	2.075985331	2.678623856	1.736156642	1.953444859	2.847255531	2.620878952	2.142880908	2.510803969	2.587769982	2.032710209	2.041168105
ENSMUSG00000016194	10.06279363	7.523481274	9.898389499	6.183734354	7.827346237	7.388904936	3.018519923	2.512682102	3.103918855	3.667906657	2.79989101	2.438671829
ENSMUSG00000016200	1.324056711	1.644093913	1.389650269	1.461914762	1.344901876	1.838290028	1.781906532	1.38223638	1.799521366	1.660715462	1.278892424	1.979305467
ENSMUSG00000016206	0.772068	0.63666	0.915695	0.847574	0.708648	1.654548	0.675644	1.015896	0.382491	0.867838	0.444149	0.489319
ENSMUSG00000016239	1.558485308	2.301247045	2.014253951	2.871395852	3.175980488	1.917532864	0.914630792	0.486443772	1.092647063	1.510152648	1.020542568	1.647243786
ENSMUSG00000016252	27.82125783	26.34516251	27.12948226	17.55874289	21.78756298	25.07279965	27.96077016	27.55310465	25.00788112	27.2401548	25.75802234	24.69666523
ENSMUSG00000016253	11.99910793	10.94881457	12.03891915	10.94191927	10.98122555	11.04083978	18.11071146	15.07969166	16.05192757	15.40069931	16.75661166	16.05750037
ENSMUSG00000016255	0	0.073469	0	0.071802	0	0	0	0	0	0	0.10916	0.165501
ENSMUSG00000016256	24.976036	24.32634	19.189566	19.871672	23.654816	25.363876	18.389849	18.505653	20.086647	19.686005	20.601604	19.394094
ENSMUSG00000016257	21.98431559	20.82152283	22.46409808	19.73992122	20.95845225	19.35329749	25.0181312	27.8747011	25.13033494	27.64040545	25.60442013	25.6493428
ENSMUSG00000016262	3.568314555	4.178636857	5.77866615	2.997436205	3.927338746	4.629500986	11.36473926	11.4261822	10.44300895	12.26965166	10.31365189	11.31672432
ENSMUSG00000016283	0	0	0	0	0	0	0	0	0	0	0	0
ENSMUSG00000016308	7.646035401	7.943093091	8.584929359	8.314588174	11.95764721	8.410393513	9.142067788	8.167873863	8.194206155	17.52723099	8.731505214	7.835670297
ENSMUSG00000016319	132.8328181	126.5379625	123.4098279	102.6237352	115.0579705	122.386966	126.8570059	118.9070192	117.5696243	133.8552425	117.2179875	113.4421876
ENSMUSG00000016327	0	0	0	0	0	0	0	0	0	0	0	0
ENSMUSG00000016344	26.80272359	23.12785335	23.07296342	25.1490177	23.09313425	22.78282981	42.2314156	44.07168742	38.57549313	42.03051359	40.90957572	42.89198889
ENSMUSG00000016346	4.747555868	5.816662013	29.14387902	7.319862327	6.14753649	5.646675262	4.779513809	4.038666054	5.450520212	5.749912094	4.10474058	4.660615164
ENSMUSG00000016349	363.69516	315.388153	378.115875	368.118469	353.062042	365.516022	197.339462	182.486725	186.620438	170.40451	181.626892	166.169907
ENSMUSG00000016356	0.370385046	0.180871831	0.269025835	0.30439064	0.22097472	0.210669702	0.089671133	0.134094881	0.11161301	0.13907374	0.038312266	0.078139244
ENSMUSG00000016382	59.72626467	58.77468598	59.8200717	60.44218432	51.6956082	40.89988203	27.18713672	22.22015513	27.3025465	26.1460688	25.41065735	25.44652944
ENSMUSG00000016386	8.662347976	7.916740515	11.18065959	8.263489288	7.709839917	8.8393173	15.6652091	14.62171784	15.71519694	14.64994165	13.85447879	14.9071651
ENSMUSG00000016409	3.403538096	3.639780555	3.039638577	3.645175106	3.980944513	3.376151596	4.143927272	4.332185868	4.457980232	4.234242224	4.213839875	4.322258803
ENSMUSG00000016427	70.524872	84.558739	70.503532	63.406914	63.904137	73.449738	64.118034	67.389587	57.325134	61.296711	57.013798	56.60482
ENSMUSG00000016458	0	0	0	0	0	0	0	0.034458862	0	0.014168111	0	0.030563317
ENSMUSG00000016477	5.928567456	5.045922327	6.354194627	6.330806568	5.750930214	2.094428671	6.664582186	5.852897903	7.248655185	5.795325603	6.512181086	6.11805257
ENSMUSG00000016481	1.005036401	1.668802253	1.121621102	1.278949942	1.693367344	1.730910188	1.730742701	1.499149713	1.84850174	1.110937534	1.250065604	1.348910472
ENSMUSG00000016487	1.523176561	2.119097332	1.471143833	2.122878128	2.22289397	2.349305034	2.120827906	1.676260829	2.110436955	2.332630882	1.928210193	2.037195522
ENSMUSG00000016493	0.634576061	0.722349173	0.44681438	0.469115566	0.735324658	0.74196524	0.158495975	0.15371898	0.112759045	0.151700998	0.206360201	0.160048099
ENSMUSG00000016494	5.092255629	4.287572975	5.383250527	5.466733732	5.587213814	5.003014912	3.928950849	3.695438827	4.001124224	4.484952411	4.191537893	3.922833219
ENSMUSG00000016495	1.639454577	1.322708705	1.396046444	1.064823045	1.538985122	1.491119802	2.713688691	2.726893065	2.781869966	2.137903426	1.639999272	2.347970954
ENSMUSG00000016496	0.534361	0.529984	0.453503	0.808072	0.63854	0.962944	0.918277	0.991002	1.350293	1.285823	0.999887	1.808199
ENSMUSG00000016498	0.042993	0	0	0	0	0.055586	0.047558	0	0	0	0.069975	0.276396
ENSMUSG00000016503	7.270030889	7.413541267	7.309288312	5.639593495	6.004551391	7.169600203	11.52967376	11.98869778	10.4559466	10.89124974	10.50624675	12.49352738
ENSMUSG00000016510	3.214711763	2.876791929	2.565057241	3.228563537	3.922352606	3.190802807	3.492090163	3.79086045	4.391742734	3.782067392	2.688588201	3.675975117
ENSMUSG00000016520	1.473952	1.560702	1.474484	1.755408	1.517923	1.52766	2.623522	2.352076	2.371535	2.292285	2.198618	2.150471
ENSMUSG00000016524	0	0	0	0	0	0	0	0	0	0	0	0
ENSMUSG00000016526	5.685658867	4.702446714	4.47109141	4.816467556	4.931730185	6.352001797	3.821509787	3.770459551	3.899853792	4.341406238	3.876734948	4.156822892
ENSMUSG00000016528	10.39460962	10.54236535	9.477180477	10.17993363	11.1901539	10.82578229	11.19392952	12.77612856	11.52581377	13.34907868	12.34957428	12.94442727
ENSMUSG00000016529	0	0	0.058349	0	0	0	0	0	0	0	0	0
ENSMUSG00000016534	8.031609847	10.04251603	5.56780462	8.86577243	8.719226956	8.829696571	4.813320005	4.552103314	5.222706273	5.996302734	5.680959139	4.901025856
ENSMUSG00000016541	141.621979	123.185272	136.172943	118.495049	123.625084	132.430573	181.112106	180.971649	177.877121	172.966827	176.916077	178.020767
ENSMUSG00000016552	1.689073318	2.533582335	2.341850858	2.417724761	3.14639184	2.841108585	2.680601838	2.759742168	2.974932424	3.724601189	3.90399777	3.538345542
ENSMUSG00000016554	14.54311369	12.09809166	13.47549365	11.56094156	12.23355075	11.91382048	16.45066092	16.26185063	17.13227641	18.10294353	16.67251861	18.48468087
ENSMUSG00000016559	42.44648331	44.06296399	42.41378984	37.76859227	41.27163614	41.80155949	73.73072897	79.03868746	76.70319483	96.16760979	92.60093233	100.6161866
ENSMUSG00000016619	8.641382577	7.708128539	7.584808532	9.286922035	9.916919261	9.584394837	9.609481098	9.444303263	8.68942593	9.951253159	8.385255993	9.066031472
ENSMUSG00000016624	1.137632186	1.333507871	1.019897333	0.92515871	1.488148631	1.098157526	1.831343606	1.273937483	1.791780296	1.26568289	1.4006933	2.058651201
ENSMUSG00000016626	0	0	0	0	0	0	0	0	0	0	0	0
ENSMUSG00000016637	2.945557649	4.01436749	3.55333737	4.469677664	4.050507673	4.040992339	5.018851359	5.612824941	5.306552671	4.144840966	5.360148437	5.037386998
ENSMUSG00000016664	5.025286591	9.615637949	8.836784777	10.47928772	10.00988071	8.193109532	5.065412535	4.45429613	4.761125677	5.725715445	6.097398082	3.991938564
ENSMUSG00000016756	0.019903076	0.035840963	0	0.016380505	0.029133754	0.042860393	0	0	0.013080161	0	0.02486002	0.01457435
ENSMUSG00000016757	5.048917744	4.547584859	4.431440056	4.602902638	4.46426784	4.571924344	13.86596662	13.30996515	13.05027774	11.57579345	12.17425235	14.06474288
ENSMUSG00000016758	0	0	0	0.109751585	0.056307464	0	0	0	0	0.058275556	0.02889675	0
ENSMUSG00000016763	2.155454904	1.937636169	2.076625254	2.196406086	1.7182044	1.81639106	1.217420402	1.377539909	1.550522931	1.35047462	1.192971511	1.599971073
ENSMUSG00000016831	9.422384461	9.800246156	9.795193972	9.332080137	9.50841872	10.64543303	9.924768594	8.910596422	10.278117	10.40025774	9.63530473	9.429909405
ENSMUSG00000016833	12.1076881	9.932614629	10.76923952	10.48761574	7.714713422	10.28139477	9.700792353	10.05294485	8.730909294	9.474218496	10.81117995	9.413400572
ENSMUSG00000016918	3.94790987	7.845529543	0.410981645	4.88426443	4.57145528	3.477821366	0.57961509	0.363489828	0.735809208	4.022200854	3.005684048	0.37177065
ENSMUSG00000016921	13.93610231	14.56213409	13.84468208	11.3213851	11.42983616	13.91635421	17.41152534	18.19015246	17.80323206	22.43429252	21.16072092	22.41867329
ENSMUSG00000016933	7.635485736	8.442953409	8.513205647	7.736983862	7.792024023	7.264752705	12.38097465	13.06282098	13.07432255	12.65329052	11.99584331	12.98469997
ENSMUSG00000016940	13.53665381	13.69434435	14.49482155	12.77867532	12.36680502	14.98408644	12.13812774	12.34117586	13.19015352	12.9509618	12.31730363	13.15570917
ENSMUSG00000016942	0	0.134737369	0.300800353	0	0.229764445	0.19377043	0	0	0	0	0.045691499	0.010638416
ENSMUSG00000016946	10.35870008	9.125232952	9.596379293	11.17434564	11.69715504	11.38286206	31.71417756	34.2465229	32.75179572	36.79780927	33.38578783	33.43094319
ENSMUSG00000016982	0	0	0	0	0	0	0	0.020135371	0	0.02168824	0	0.006605139
ENSMUSG00000016984	1.966162	1.54838	1.151488	1.619516	2.271562	1.465098	1.682984	1.14118	1.909308	1.916009	1.772862	2.137786
ENSMUSG00000016995	2.180910702	1.920836966	1.521741188	1.483049882	2.055346494	1.89876253	2.464970403	2.04958632	1.893704189	2.284078719	1.809222626	1.861443607
ENSMUSG00000016998	0	0	0	0	0	0	0	0	0	0	0	0
ENSMUSG00000017000	0	0	0	0	0	0	0	0	0	0	0	0
ENSMUSG00000017002	0.325491675	0.118612443	0.094060575	0.160670219	0.172729947	0.064300888	0.240443802	0.315245382	0	0	0.297260712	0.26943594
ENSMUSG00000017003	0	0	0	0	0	0	0	0	0	0	0	0
ENSMUSG00000017004	0	0	0	0	0	0	0	0	0	0	0	0
ENSMUSG00000017007	0.059347241	0.09327255	0.111841949	0.174299931	0.112476427	0.172551718	0.081799698	0.125838761	0.078248864	0.105138402	0.026058794	0.011538766
ENSMUSG00000017009	21.72845268	25.4884988	21.76788491	28.77156554	31.97217492	29.15520269	7.070636284	5.03380836	6.940021619	9.953532514	10.40537217	6.630480574
ENSMUSG00000017049	0	0	0	0	0	0	0	0	0	0	0	0
ENSMUSG00000017057	1.348253	1.440896	1.238039	2.386449	1.60584	1.413384	1.622823	1.309821	1.786039	1.891609	1.788313	1.467189
ENSMUSG00000017064	0	0	0	0	0	0	0	0	0	0	0	0
ENSMUSG00000017119	18.99517971	19.09889044	14.7093264	18.51358123	21.51102589	19.54796672	17.65927449	15.32384649	17.82461542	17.0885402	14.64541755	16.17515847
ENSMUSG00000017132	19.403537	19.88029525	20.75078078	19.17897355	22.76093606	21.48994456	13.12581217	11.93784116	13.20715984	12.16475929	11.43022282	11.42760002
ENSMUSG00000017144	2.51370926	2.621019128	2.476907613	2.226458014	2.21638599	2.421075432	6.227533294	7.557428557	7.369607387	7.131100963	7.354947401	8.622972561
ENSMUSG00000017146	0.252320039	0.192367901	0.151467925	0.177452472	0.249658211	0.165203429	0.464372255	0.442790632	0.73024996	0.597646499	0.22696005	0.435665143
ENSMUSG00000017165	0.147596	0	0	0	0.3908	0	0	0	0	0	0	0.247421
ENSMUSG00000017167	33.89866147	32.4663565	38.25399674	39.58775899	38.31696967	36.42755728	4.20440094	2.628725421	4.142547022	4.285222053	3.042190525	2.64676742
ENSMUSG00000017176	7.523040674	6.223967136	7.270709142	5.960420979	5.573359066	6.202022157	10.15724024	11.7378846	10.75399834	10.56325718	10.16396196	10.90058411
ENSMUSG00000017188	61.055141	58.35714	65.275627	52.866966	54.311642	62.715118	53.034004	54.143215	47.620419	50.316803	48.322178	50.58815
ENSMUSG00000017195	0	0	0.096235418	0	0	0	0	0	0.094551686	0	0	0
ENSMUSG00000017204	0	0	0	0.064055	0	0	0.083151	0	0.037937	0.034011	0.056302	0
ENSMUSG00000017210	12.19325147	11.31385207	12.99140598	13.22764171	12.91024407	13.73245975	9.465194256	9.600581262	9.233312121	10.55960509	9.465474233	9.793413744
ENSMUSG00000017211	0	0	0	0	0	0	0.037093064	0	0.012871735	0.062971112	0.122215825	0
ENSMUSG00000017221	23.65722756	21.09819711	22.96910019	19.80078822	21.85599121	18.09334339	28.09694676	23.11587827	20.41360643	21.90155152	28.6442918	29.74699652
ENSMUSG00000017264	11.1313407	11.53588763	11.3139401	9.764223137	10.16960315	10.36529102	15.2674713	13.85294517	14.0928398	13.44574991	15.37451651	15.29176921
ENSMUSG00000017286	6.417685614	7.638293343	7.426713508	6.661736924	7.026752955	7.289972092	7.387912036	5.967130463	7.482463436	7.71609432	5.480503143	6.696362725
ENSMUSG00000017288	13.07713699	12.55504373	13.67181247	13.47901572	13.13661482	13.04798189	12.33544819	12.06503271	12.16960863	11.54381515	11.28569717	12.52335719
ENSMUSG00000017291	3.231299617	11.72451692	10.54568457	11.34402124	12.0715808	10.84462929	7.917045522	6.132492891	10.29614163	10.06326087	7.863462649	9.212454928
ENSMUSG00000017299	10.31499146	8.639520484	9.90514535	9.569883122	10.33221808	9.278187589	9.909923951	10.35756863	8.31304938	9.900045293	10.2319456	10.00778454
ENSMUSG00000017300	0	0	0	0	0.06868225	0	0	0	0	0	0	0
ENSMUSG00000017307	4.476909394	5.180805522	4.423524113	6.300003627	4.036850194	5.391563637	4.1019276	4.187636802	3.484731139	5.348087003	4.104668745	4.306273866
ENSMUSG00000017309	0.128767	0.436124	0.029588	0.424043598	0.450356974	0.508690814	0.046398	0	0.05086	0.101007	0.083669	0
ENSMUSG00000017310	0	0	0	0	0	0	0	0	0	0	0	0
ENSMUSG00000017311	0	0	0	0	0	0	0	0	0	0	0	0
ENSMUSG00000017314	35.48538095	33.9817	40.45806433	40.95143304	35.88936823	36.79043097	21.71776683	19.84144357	22.22753545	20.49341774	23.35629543	19.88724184
ENSMUSG00000017316	0	0	0	0	0	0	0	0	0	0	0	0
ENSMUSG00000017344	28.578831	23.93144365	22.16973817	26.18279119	25.28804865	20.57540571	27.61660274	23.23875545	35.4116232	22.36473346	25.25512966	27.07557769
ENSMUSG00000017376	7.216379852	7.600830845	7.876072661	9.09282467	8.081517745	9.395471997	7.2339509	6.704962287	6.625317874	5.39114371	6.118117893	6.387182227
ENSMUSG00000017386	4.084843225	3.846138538	4.077646777	3.362194861	3.637766372	3.084581515	20.17190578	22.87813997	19.03036909	20.56105097	18.99835012	20.35260159
ENSMUSG00000017390	178.971455	168.6084546	185.0307851	186.3685369	192.0973564	191.9365885	74.83622502	73.04522241	82.50102105	82.70865044	73.93077564	70.88574806
ENSMUSG00000017400	22.81487545	21.90525368	24.20819527	24.22274151	27.41821943	27.72982212	4.127675088	3.100184438	3.424334788	4.463435632	3.077726919	3.003676728
ENSMUSG00000017404	209.6827891	209.0380606	217.1039558	195.8475178	191.2133202	192.1251615	233.6214265	248.5111524	233.3869363	231.6849424	230.1054519	241.4916483
ENSMUSG00000017405	0.34807796	0.339629817	0.18556281	0.429710151	0.639761329	0.657964582	1.071198137	0.918184086	0.951814535	0.990745253	0.789356894	0.743939456
ENSMUSG00000017412	8.916547031	12.6493016	10.54749067	11.4559431	12.20119525	11.13251363	4.065082837	3.492774944	5.167005321	3.717738969	3.129369716	3.821647111
ENSMUSG00000017417	1.147830933	1.574777309	2.014211854	2.266245724	1.899892371	1.786701589	0.800876699	0.855143515	0.832625051	0.894562283	0.782310574	0.673750308
ENSMUSG00000017418	2.013454271	2.691977276	2.757027468	4.019059036	3.198574251	4.107686478	0.720162192	4.1959762	4.389026117	4.78063791	4.272262279	0.777056742
ENSMUSG00000017421	10.25758025	10.59713786	8.894949904	10.16828993	9.768463884	10.38425227	14.29645545	15.25816562	15.0206549	14.3264354	12.41504534	14.50788325
ENSMUSG00000017428	7.881422316	5.976705525	7.641077941	6.594082274	6.928671392	7.816740066	7.315590824	7.87503187	7.763979687	8.156785078	7.958787062	8.536791728
ENSMUSG00000017446	0.878352023	1.295598761	0.881931346	1.164063265	0.603016691	0.907964156	1.739406886	1.323434733	1.576807936	1.476886766	2.002142353	1.581604298
ENSMUSG00000017453	0.640377719	0.552484768	0.150379938	0.190285246	0.178687297	0.037019623	0.183314203	0.437506185	0.161634964	0.371293921	0.475764328	0.201613569
ENSMUSG00000017466	87.40955503	96.86486001	74.10980855	123.5806775	77.3878759	82.99301986	150.9175312	147.4698673	153.7673044	153.8420566	169.5559078	167.9488894
ENSMUSG00000017478	3.529608213	3.761311978	3.915855112	3.961983296	3.961951806	3.578168716	4.436455516	3.737645463	3.897374131	4.301374302	3.463010182	4.303573371
ENSMUSG00000017485	5.018905149	6.609658677	5.174782426	5.510689491	5.974516066	5.799599879	9.058938713	8.773728109	11.71491693	10.16716524	8.324522102	10.86486796
ENSMUSG00000017491	1.028973356	1.095841866	1.285407417	1.093017893	0.899325305	0.903468484	0.750766958	0.988352783	1.6418892	0.895250436	0.98471726	0.909014906
ENSMUSG00000017493	21.52271373	22.69369193	26.53011714	19.97614325	24.88779334	24.40210226	25.78656348	26.01272654	26.86511497	27.73187145	30.42843061	28.51711465
ENSMUSG00000017499	0.086515829	0.108516568	0.079035894	0.11557396	0.075839668	0.084869443	0.235440105	0.320285763	0.326038576	0.369373218	0.292801045	0.59852777
ENSMUSG00000017548	6.718814056	6.903329501	5.670005676	6.50061952	6.8333286	6.528312495	4.909913656	5.074395732	7.245945228	5.585925948	4.653121209	5.319060499
ENSMUSG00000017550	0.561611716	0.721915925	0.53649151	0.361964834	0.375373071	0.448982278	0.796661503	0.849314688	0.771901733	1.261441104	0.902158008	1.288603976
ENSMUSG00000017561	2.50292234	2.590696431	2.594470161	2.017582004	2.618133591	3.125657096	2.181616791	2.399632344	2.490422151	2.26826123	2.424773501	2.581924393
ENSMUSG00000017588	0	0	0	0	0	0.081017	0	0	0	0	0	0
ENSMUSG00000017607	0.025367055	0.376293786	0.05433326	0.333166462	0.138299214	0.212065885	0	0	0.026985798	0.016926906	0.014852128	0
ENSMUSG00000017615	12.04358357	13.72665347	12.55587164	14.4515967	6.362895323	14.41793229	23.34221755	23.92925382	22.41765166	24.86440109	21.49144719	22.74997312
ENSMUSG00000017631	57.49499076	35.36856331	42.41312325	63.30224199	65.12450811	64.03673909	37.61187378	33.18610435	35.59516341	35.33669821	28.50497232	34.62994555
ENSMUSG00000017639	37.47569756	37.71653844	40.90026437	40.67189462	40.12159191	39.51815911	37.1771238	32.20842344	34.83535727	38.91339811	33.72524381	34.8814439
ENSMUSG00000017652	0.0557863	0.164751743	0.106676297	0.124065407	0.08916445	0.159087347	0.477845798	0.467459766	0.344808089	0.266949803	0.322097447	0.343441392
ENSMUSG00000017664	11.07253123	11.03480886	13.47137257	11.12255893	11.73418592	12.17046376	8.217950867	8.107947153	8.456949834	7.961313471	8.015297469	8.160720552
ENSMUSG00000017667	2.344849	2.520699	2.510545	2.996011	3.173698	3.020363	3.834022	3.228729	3.525345	4.167431	3.996094	3.784021
ENSMUSG00000017670	27.92704977	25.63357522	30.64815968	31.05349069	29.54163047	30.13795708	15.26579556	13.62067469	15.84128791	14.55703731	14.64173583	13.60357966
ENSMUSG00000017677	4.861345817	5.832913731	4.931022482	4.205159328	4.701335858	4.620496526	4.928684081	5.742851664	5.682890276	7.349785593	8.11167715	7.598026424
ENSMUSG00000017679	1.001975679	0.985179205	1.070021466	1.349693228	1.32883967	1.24107273	1.134009858	1.351270255	1.409602963	1.126540814	1.004056623	2.320912889
ENSMUSG00000017686	9.301680224	8.772777747	9.43039316	8.867649621	9.103864158	9.023730567	8.769998251	9.138705222	8.421467825	9.064749305	7.852601983	8.956639308
ENSMUSG00000017688	0	0	0	0	0.034062679	0	0	0	0	0	0	0
ENSMUSG00000017692	5.399518167	5.434606634	6.472298135	6.921242383	6.829882354	6.982406467	3.149224623	2.768879078	3.319760091	3.147684517	2.971701355	2.468651729
ENSMUSG00000017697	0.086667275	0.232095784	0	0.5819988	0.524026194	0.686324316	2.285694496	2.821449309	2.619034439	2.190762016	2.672400959	2.746747441
ENSMUSG00000017707	62.54130424	64.97138983	60.39789372	62.85251444	67.3088054	64.44679626	52.84405337	47.56413543	55.82547581	53.18314285	50.3661909	48.27199779
ENSMUSG00000017713	0.848740057	0.636771326	0.633076868	0.561172944	0.954724575	0.680224518	0.565820907	0.452540993	0.463673251	0.581800263	0.504169718	0.615489392
ENSMUSG00000017715	12.69705049	12.06917891	13.61180454	13.42732864	12.06309271	11.08322785	10.14390514	9.80350086	9.520254994	9.574862182	9.125987467	9.105682834
ENSMUSG00000017716	0.309404739	0.225445571	0.197734153	0.050985188	0.115812156	0.110394535	0.919920561	1.122912347	1.098584312	1.135116743	0.587241046	1.165771185
ENSMUSG00000017718	0.146617471	0.132940557	0.072642858	0.220560303	0.119245782	0.154983914	0.193050158	0.830881505	0.617370026	0.427756797	0.908712197	0.200028141
ENSMUSG00000017720	0.026281	0	0	0	0.041495	0.142632	0	0.122848	0	0.092051	0	0
ENSMUSG00000017721	18.25074222	16.82111531	17.84007194	19.65048784	17.91981823	18.02634021	24.46149621	27.23971191	24.4599661	24.6746383	26.37958551	27.01435477
ENSMUSG00000017723	3.238782908	3.701060908	0.142073902	2.135542125	2.433077605	3.086550984	0	0.153133534	0.116605611	1.624417809	0.705801388	0.099424428
ENSMUSG00000017724	1.468966592	1.924478536	1.134924884	1.479503865	1.402477888	1.69348553	6.312275073	6.459657159	6.593448594	6.348699246	7.250994133	6.061952206
ENSMUSG00000017733	0	0	0	0	0	0	0	0.091462	0	0	0	0
ENSMUSG00000017734	25.09517459	28.79411763	26.40228774	21.11457965	29.14991638	32.01599782	7.816454658	8.308811498	9.62092129	8.247950073	8.869113698	7.462463308
ENSMUSG00000017737	0.27626776	0.522365346	0.280390467	0.501048912	0.537748025	0.410040619	1.067493	1.195872824	1.149041189	0.955656661	1.270100958	1.261367701
ENSMUSG00000017740	56.80354305	59.55160521	65.64043046	40.1515048	38.73779178	64.88178236	40.83537745	35.54074583	36.39541632	36.93912758	36.26271142	33.82770719
ENSMUSG00000017747	1.585736075	2.622735127	1.731449661	1.795870269	1.89253812	1.674341998	2.598505577	2.736152528	2.509388013	2.224302235	2.519593606	2.709151099
ENSMUSG00000017754	30.7741349	33.08467085	23.24613125	25.53686589	25.20038449	24.37716078	16.90216113	15.76578313	18.44806447	20.95383735	19.46044913	13.88658123
ENSMUSG00000017756	0.370557474	0.586487477	0.284097192	0.435531383	0.316447197	0.401263793	0.564451582	0.35639224	0.428592382	0.604010947	0.466290813	0.521521218
ENSMUSG00000017760	15.29912217	13.67558714	12.8522288	13.92394075	14.02629034	15.02444766	9.095763919	9.311602708	10.73042734	10.67901107	10.62228157	10.11224115
ENSMUSG00000017764	9.042678826	7.56237171	8.81650293	9.436379209	9.083941505	8.982559933	8.496168641	6.17902829	6.549185147	8.388732188	8.108736967	7.555150595
ENSMUSG00000017765	6.600384482	8.079182311	4.620330555	6.332687805	6.03211387	6.024259419	5.539732324	5.059732682	6.12263259	6.287620161	5.690880914	5.379973851
ENSMUSG00000017767	1.141706077	1.586306944	1.484789142	0.96713496	1.291520594	1.276642875	1.264502784	1.18012781	1.047468534	0.810310109	0.580991462	1.116049761
ENSMUSG00000017774	2.485631408	2.364571244	2.806670138	3.51212093	3.209550303	3.22739859	5.090412773	4.726600167	5.190034368	5.032631395	4.502263595	4.622230853
ENSMUSG00000017776	24.15499625	26.68301509	27.80914256	15.51222292	13.48159484	20.46348668	13.86461533	25.17086288	10.94441769	13.73137616	26.34896827	10.19607174
ENSMUSG00000017778	95.20323837	97.85935245	101.108769	91.31849367	92.85717086	97.67786536	83.15105895	90.17321357	85.92947733	86.30127341	90.4912207	87.7059714
ENSMUSG00000017781	73.95673071	63.24890307	74.09839554	75.39769188	69.65936365	71.4046956	70.10952722	75.42258111	75.32519371	69.10831737	41.95459751	76.18199405
ENSMUSG00000017801	13.34280929	11.68969629	11.94824156	11.42323398	11.17559218	11.64835283	13.9029286	14.25797042	14.30135161	13.37040978	14.24380386	15.14900513
ENSMUSG00000017802	19.04884504	18.79427866	18.14408728	17.59240401	18.99128924	18.53616898	19.98365602	19.85348978	19.75707916	21.95140492	17.99158598	20.03532083
ENSMUSG00000017817	0.384668665	0.325491002	0.320892055	0.341900541	0.23938768	0.118623524	0.553804395	0.698081865	0.540107511	0.527957465	0.829797387	0.425960216
ENSMUSG00000017830	0.252927396	0.299339584	0.174322656	0.577979932	0.324694234	0.416724137	0.160514375	0.10460502	0.044532803	0.085007617	0.160203389	0.1660686
ENSMUSG00000017831	40.878475	42.409866	40.850464	43.733486	39.036278	40.678158	39.691067	37.963741	43.747845	43.859844	41.103886	43.769909
ENSMUSG00000017832	0	0.098165515	0.20003827	0.080171752	0	0.34426049	0.057111967	0.222734234	0.136364094	0.076198683	0.396734369	0.366901967
ENSMUSG00000017837	2.804014454	2.823470327	3.582169873	3.020716894	3.365562028	1.954613308	10.38549513	11.84009401	8.711132048	7.296332784	12.66691199	7.67654928
ENSMUSG00000017843	19.26232228	19.99110951	21.36077947	20.74086131	20.85857864	21.31613405	18.38099221	20.56948127	20.90066923	21.21091393	21.38590887	22.15313016
ENSMUSG00000017858	7.081445837	7.653214085	7.148017334	7.323283754	7.498289071	7.434577604	7.381289388	5.360074792	6.405902623	6.067868946	5.371972464	5.558041375
ENSMUSG00000017861	0.091915817	0.171800586	0.061074766	0.056043706	0.067486749	0.182269396	0.476186813	0.655633053	0.621336871	0.806775966	0.556417314	0.492726111
ENSMUSG00000017868	1.305017944	1.322882223	0.642097781	0.150365289	0.79878487	0.507130761	0	0	0.020433261	0	0	0.022728699
ENSMUSG00000017897	1.085543638	1.021485787	0.735951798	1.47529375	1.248206218	0.772741494	1.970235927	1.938956124	1.943740949	1.651966472	2.414191163	2.044446089
ENSMUSG00000017922	0	0	0	0	0	0	0	0	0	0	0	0
ENSMUSG00000017929	10.64463221	10.09042695	12.13595728	11.87599467	10.65750848	11.43418996	20.24585873	21.29157758	20.99812078	20.45156747	18.82093957	20.68166898
ENSMUSG00000017943	26.23808707	23.40288356	26.77180122	29.71460326	27.62136124	25.56412173	40.45363253	40.22221767	41.71041398	40.45159071	43.43258371	44.36975422
ENSMUSG00000017950	0	0	0	0	0	0	0	0	0	0	0	0
ENSMUSG00000017969	0.871900661	1.00949448	1.084169641	0.860502584	1.11229815	0.723128451	0.646722272	0.704178685	0.827877202	1.152904031	0.80979573	0.903980506
ENSMUSG00000017978	8.727073876	8.829741491	10.35693051	7.580593202	8.276805765	10.33587045	9.391119461	7.798209532	9.657430414	9.847714488	8.834514127	8.290249278
ENSMUSG00000017999	4.858237046	4.937392616	4.659180371	4.662476163	4.437011802	5.168846463	6.538487836	6.188910204	6.488754576	6.48984486	5.832670687	7.243250922
ENSMUSG00000018001	4.902427731	4.801959423	4.834992081	4.960322035	5.701224924	5.297388463	8.602362255	7.647109445	8.131649528	7.95490563	6.982738939	7.811930765
ENSMUSG00000018008	2.141847958	2.31816788	1.756888229	1.06852032	1.429334043	1.785890516	1.016353628	1.177045848	1.32908461	0.908250338	1.017044639	0.975544618
ENSMUSG00000018012	11.80216359	9.279013476	9.827879401	11.65786747	7.969598835	9.752570884	123.7767569	145.9005366	123.4274881	118.7207757	125.3090949	133.8261204
ENSMUSG00000018040	17.6324949	16.8991056	18.81528013	19.90194236	18.51815315	18.3212443	18.00927572	18.85410487	18.1836534	18.55746172	18.76740476	19.75024482
ENSMUSG00000018042	17.44160737	17.73743431	16.54424873	17.08776965	16.42118198	16.95256408	31.61604519	31.68125993	32.06343986	32.85121777	32.67770614	32.36537929
ENSMUSG00000018068	1.23028151	1.299995851	1.226120918	1.19639443	1.256042806	1.267681505	1.352676533	1.198831189	1.60022189	1.556791874	1.139264623	1.207951342
ENSMUSG00000018076	4.686614779	5.11972234	5.198800632	5.87727224	5.541047093	5.382769709	4.271111016	3.88451641	4.16865727	3.892406699	3.237094155	3.679409967
ENSMUSG00000018102	38.012192	38.165539	36.349983	37.724369	43.123447	40.191151	12.840496	12.415549	14.452813	18.826658	15.739852	14.204166
ENSMUSG00000018126	0.381130103	0.574902866	0.40372993	0.697963311	0.366367105	0.726510209	0.471150308	1.078414463	0.7479749	0.662070528	1.072808403	0.537998783
ENSMUSG00000018143	3.893784088	3.304006852	3.927942079	3.948831824	4.861245239	4.522722328	3.901073379	4.192457923	4.360765921	4.427230018	3.437767169	4.146827961
ENSMUSG00000018160	3.794499931	4.002201639	3.738135219	4.214795406	3.935826588	4.143658385	4.002309272	3.790111445	4.307249404	4.736927791	4.307770015	4.343780132
ENSMUSG00000018166	2.718024	2.902342	1.879177	1.465858	2.401448	2.777922	0.116344	0.079011	0.156179	0.22186	0.086442	0
ENSMUSG00000018167	6.616124482	7.47525182	6.120048303	5.657492464	6.619343989	7.188094196	4.590073345	4.842685062	5.262995669	4.032036995	4.552250114	4.055869548
ENSMUSG00000018168	0	0	0	0.019946839	0.010233541	0	0	0	0	0	0.008766413	0
ENSMUSG00000018169	1.83993919	1.585395563	1.330505357	1.54891991	1.332155857	1.269429644	2.690861831	3.020422914	2.579044654	2.369322667	2.293031044	2.569927182
ENSMUSG00000018171	16.55744708	17.43220605	15.57019744	15.80297953	15.42668429	18.59727857	14.89391381	14.83185465	14.35056495	16.07603035	13.27659235	14.12039124
ENSMUSG00000018189	6.087534252	5.321191543	5.33164536	6.293651039	4.870865363	5.718804134	4.723467604	3.929851953	4.55314006	4.231272032	4.5406355	4.365221955
ENSMUSG00000018196	2.044640412	2.355582671	2.438083285	1.838607575	1.988648374	1.869349071	2.443498439	2.173529351	2.257207642	2.405701335	2.291666798	2.582479588
ENSMUSG00000018199	4.052509053	5.742830825	4.201265385	4.82232698	5.887171433	5.465378665	5.147756277	4.257749091	6.680565732	6.382266888	4.419427812	5.823393461
ENSMUSG00000018209	8.573983343	9.203593442	9.136126032	9.735844712	9.740481709	8.581423082	8.974933395	7.488283628	8.686885907	7.795078224	6.525276673	7.916268759
ENSMUSG00000018211	0	0	0	0	0	0	0	0	0	0	0	0
ENSMUSG00000018217	5.998210249	5.885439816	5.575377896	5.163058964	7.560497638	5.828360978	5.09615277	5.473180173	5.982411734	5.700993321	5.437304234	6.452152983
ENSMUSG00000018238	0.794632705	0.6252866	0.15949225	0.334011799	0.91952385	0.596086425	0.59065407	0.680390972	0.639387121	0.628035592	0.828983089	0.974768931
ENSMUSG00000018239	5.148645324	4.056070509	4.764032035	4.774046891	3.438823815	4.035977037	3.463167833	3.848254272	4.02841056	3.512323477	4.334317167	3.057781079
ENSMUSG00000018259	0	0	0	0	0	0	0	0	0	0	0	0
ENSMUSG00000018263	0	0	0	0	0	0	0	0.015220758	0.029229825	0	0	0.033288187
ENSMUSG00000018286	42.89087346	44.19653515	43.299998	38.19084388	40.9745595	44.68091806	57.98317323	61.83888463	55.79471953	59.00050427	61.43452005	59.78499378
ENSMUSG00000018287	22.77970228	22.40490315	22.04414208	22.314278	19.7581999	20.15392079	20.69708403	24.78904612	21.25856988	21.71034603	22.55805862	23.45354578
ENSMUSG00000018293	63.23236955	56.50069702	64.90481097	34.45131143	43.28821273	59.62887601	56.7450906	62.1074834	53.96770021	55.6364037	58.62539649	57.07206484
ENSMUSG00000018322	29.85615174	24.45063848	29.70082371	27.81333415	27.59311084	30.20401811	11.52579856	10.39736854	11.45096138	12.46619734	10.85421503	11.71446883
ENSMUSG00000018326	173.4731959	172.8287316	179.4139054	176.2456239	163.182073	167.7619551	185.5050168	181.7863294	194.240139	195.5720044	187.8186895	189.941608
ENSMUSG00000018334	18.6987361	19.19283795	23.21840014	23.00780084	22.63737092	23.69167005	11.32452478	10.16834583	5.484655853	11.41858858	10.04089102	10.02850671
ENSMUSG00000018339	3.065444875	4.2355455	1.974749539	2.122248787	2.873348972	2.879510446	5.737641245	6.778066938	6.661662657	6.106367822	7.499979251	6.931259745
ENSMUSG00000018340	34.01174136	29.27310334	31.06173504	31.97910596	31.24989572	30.9547222	22.25560475	21.12512914	23.43653119	23.33631393	23.48572587	20.52262022
ENSMUSG00000018341	1.016375909	1.030516236	1.178537375	1.091459304	1.07605208	0.685430311	0.5266165	0.645581234	1.016637691	0.902212335	0.686703585	0.912704164
ENSMUSG00000018347	4.409922585	3.705451443	5.137422307	3.594786744	4.857603733	5.767990536	3.428468794	3.416407444	3.947237784	5.372441685	6.020752307	5.201394256
ENSMUSG00000018362	7.231144361	6.881182513	5.637031468	6.34583518	6.648939197	8.038282863	14.13610294	15.30135719	18.54878576	16.31330117	18.79393331	17.74102745
ENSMUSG00000018363	5.074402959	5.387179546	4.921085351	5.752918501	5.794210942	5.354346126	6.022368031	6.014035161	7.651884801	6.962062792	7.061548733	7.178875882
ENSMUSG00000018372	1.046260005	1.094286558	0.941565848	0.815877237	0.944900082	0.934064653	0.765633334	0.68028265	1.059198561	0.863983134	0.675664416	0.855209302
ENSMUSG00000018377	5.606160421	6.910891879	4.856054529	6.081086221	6.513573151	6.685331281	7.707815319	7.928183213	8.973365128	9.927553236	9.447941705	8.920425964
ENSMUSG00000018378	2.573281961	3.204157724	2.44914252	2.947993414	3.459301269	3.349571865	5.225836505	5.784807505	7.470324684	5.548316838	5.162560107	6.391892302
ENSMUSG00000018379	9.106932026	8.920924273	8.62407419	7.596620187	8.030003047	7.768109828	10.45036665	12.07386201	12.1688611	10.76165239	9.620047553	14.0276625
ENSMUSG00000018381	8.102974991	7.467736465	8.168575357	8.622868637	7.836020403	7.891497377	1.251209388	1.125863487	1.69838899	1.850365117	1.393894115	1.407424614
ENSMUSG00000018387	1.153392795	0.834893248	1.167253463	1.149969621	0.863553753	1.129139613	1.020822403	0.646706139	0.735936214	0.573294676	1.229097775	0.535379241
ENSMUSG00000018395	27.81811859	28.12630427	27.43244738	27.47697537	25.68144278	25.59715418	36.04887724	32.71265317	39.40308473	38.8556539	34.83659461	38.39718395
ENSMUSG00000018398	41.63987476	42.54970587	42.40553897	44.08542585	43.01763888	42.78474317	16.48837191	12.82291203	14.78140496	13.39701044	12.190287	12.34543051
ENSMUSG00000018401	11.74945516	11.70027781	12.78550505	14.92613191	14.24109928	14.61852235	17.19748284	16.46489028	18.34571782	17.5176575	15.39895349	17.07751185
ENSMUSG00000018405	2.796372899	2.926900907	2.41230867	2.866840961	2.884876547	3.528313653	5.070495801	5.040269005	5.403728688	4.836480515	4.353492857	4.082275658
ENSMUSG00000018411	14.79016499	13.95808586	15.31946153	19.05541333	17.33246896	39.30705653	59.32215227	248.9629906	63.40522803	66.86518457	224.7167763	60.02382928
ENSMUSG00000018412	9.292277587	10.21032836	10.11303775	9.130523344	10.00893538	9.720354973	10.05757718	9.673381863	11.09512955	11.24468809	10.19726181	10.76511334
ENSMUSG00000018415	14.60505261	16.25374662	16.94965462	17.15764221	17.27070894	16.38358997	12.10736461	12.28198592	13.20147786	11.84511288	11.51937582	11.18065439
ENSMUSG00000018417	1.063630467	1.201898002	1.121104786	1.431087253	1.216939995	1.187301737	3.214477916	3.785766048	4.610325932	3.137104121	3.343368234	3.570889634
ENSMUSG00000018425	6.260760112	7.426082316	6.225275722	6.404709349	7.181505805	6.401550657	6.656156088	6.627585923	7.356087542	7.72862388	6.671811115	7.053022954
ENSMUSG00000018427	5.697286	7.320251	5.398921	6.136497	5.92679	6.905993	1.888404	1.633127	1.854417	1.608828	1.634691	1.644554
ENSMUSG00000018428	8.152370479	9.253889095	9.49280316	9.465318863	6.82242029	9.073384322	13.26003685	13.64612066	14.26672446	11.7965374	11.41889206	13.4159204
ENSMUSG00000018433	2.920006887	3.65702609	3.976132666	2.763754374	3.227888585	3.505037392	4.067809954	4.773250473	5.034931572	5.397690385	4.339118182	4.565786199
ENSMUSG00000018442	1.922354804	2.932754583	2.686125677	2.881996046	2.317647712	2.525758277	2.615869604	2.776565826	3.011402545	3.37111658	2.447367172	2.855348176
ENSMUSG00000018446	18.91440085	17.69942724	19.0452929	15.32490967	17.21111911	18.07696164	23.30705306	24.29629837	21.80156987	22.81770242	23.52147714	24.23454386
ENSMUSG00000018449	1.702120321	2.214519994	1.896105999	2.393514513	1.882166637	1.691497894	2.030012115	2.076112596	2.182020992	1.513224915	1.779648744	1.869124401
ENSMUSG00000018451	141.538651	133.193344	135.210022	120.249489	108.525467	123.830971	139.591446	146.869812	128.104172	135.363342	122.741699	131.85437
ENSMUSG00000018459	2.118711971	2.672805655	1.989326166	2.24447985	2.619096716	1.659894951	3.627466607	3.390565568	3.992458424	2.748308802	3.018594291	2.991613691
ENSMUSG00000018470	6.799412734	6.522300068	7.324613839	8.24338791	9.287032914	9.605613867	2.129569313	1.605127972	2.47604835	3.090954737	2.231484843	2.372213213
ENSMUSG00000018474	81.03222726	96.17480578	94.83911194	101.7194285	93.0874895	92.33986056	94.97514953	83.06077523	92.893267	92.22247475	83.50241097	87.98849018
ENSMUSG00000018476	4.394899104	4.700528471	4.158962795	6.248325361	7.251520927	5.479123737	10.04848799	9.639819324	9.126960198	9.54761764	9.253170518	10.31597264
ENSMUSG00000018479	0	0.077573198	0	0.175492589	0	0	0	0	0.173537288	0	0.230861379	0
ENSMUSG00000018481	12.812233	15.397248	13.840287	14.543333	14.649143	13.920088	18.933372	17.6889	20.040543	19.68541	19.005669	19.559256
ENSMUSG00000018486	0.130969	0.17815	0.157755	0.154337	0.183744	0.079741	0.332059	0.186582	0.385011	0.327726	0.145054	0.458761
ENSMUSG00000018500	3.428182	4.245963	2.727496	2.642094	2.476178	3.321041	2.091577	2.965463	2.442483	3.586171	2.256986	2.541243
ENSMUSG00000018501	12.60500046	15.69794576	15.19325868	16.37688096	15.24487353	15.09356269	16.16554819	13.62971386	17.60199619	17.48726872	13.6488791	15.37474787
ENSMUSG00000018507	2.868044573	2.895050702	2.554788797	2.613864904	2.950298414	3.065657717	6.635350229	6.914780257	6.675599916	5.36205538	5.266078008	5.694154344
ENSMUSG00000018509	8.329508147	7.820858669	10.14258003	9.448807145	7.772133034	5.65552238	8.979510329	13.42745328	11.11639498	12.01862152	12.48593149	14.19031505
ENSMUSG00000018537	3.000419432	3.489922948	2.416929396	2.503742102	2.778298241	2.582950078	5.737226087	6.11110206	5.634348161	5.225219898	6.257324286	6.268007197
ENSMUSG00000018541	3.25571238	3.141081623	3.301041476	3.944614055	4.830535773	3.919857651	4.22505068	3.816339249	4.410685338	4.623112629	4.138635734	5.788014143
ENSMUSG00000018543	0.111817	0.424938	0.254338	0.359117	0	0.198605	0	0	0	0.076196	0.214063	0
ENSMUSG00000018547	29.94980001	29.87957821	32.30989773	33.92810205	31.15344228	30.94247856	62.60927903	58.26748781	61.9151887	63.95543552	60.26576975	63.74349208
ENSMUSG00000018548	37.38714858	42.45187722	45.45004457	43.51642642	45.18117598	43.55305871	34.31197907	31.99219361	37.79870174	37.68446232	34.58371327	34.03188415
ENSMUSG00000018554	0.476776374	0.332454975	0.593456029	0.66843281	0.45687888	0.447713538	0.768565999	0.397957283	0.503459541	1.387556241	0.538459294	0.81654571
ENSMUSG00000018559	27.62552377	23.45517937	25.78981487	25.02189033	26.5888064	24.58534611	24.93609918	25.94269966	22.00500313	23.60948136	23.80732355	23.93120188
ENSMUSG00000018565	18.30115312	15.60662373	16.43500007	16.54010257	13.65486429	18.67930169	23.99754794	21.89165707	25.49936745	25.57844913	20.01805996	24.56715009
ENSMUSG00000018566	0.390121297	0.210680365	0.428350098	0.356017315	0.254142786	0.297549802	0.297205714	0.350040261	0.463769989	0.825790659	0.592550589	0.49628933
ENSMUSG00000018567	66.66765583	65.88998127	65.20448246	62.26519217	63.41107454	58.84453994	84.3632955	90.6874169	85.03077756	80.08363036	86.63875487	90.72437373
ENSMUSG00000018569	0	0.043814453	0	0	0	0	0.06112011	0	0	0.078355865	0	0
ENSMUSG00000018570	0.089598728	0.081276959	0.034198339	0	0.146282412	0	0.796127387	0.746728468	0.525287448	0.516732302	0.700420866	0.642838497
ENSMUSG00000018572	9.987730343	5.730847601	9.866456531	9.529568899	8.667767226	8.238950759	11.63565194	10.04184577	10.9383704	11.68015297	10.21066781	7.868202496
ENSMUSG00000018574	12.74299214	13.80363865	10.166893	12.32399592	12.14375836	13.45930905	11.38181022	11.54340441	11.1988317	11.68835413	11.19630297	11.03910957
ENSMUSG00000018581	0.077827256	0.317129003	0.024352989	0.15943757	0.268871752	0.158206872	0.116721293	0.207997587	0.150504116	0.283608517	0.201824252	0.163494805
ENSMUSG00000018583	9.863186321	11.10504401	10.48727203	10.03586923	10.15975802	11.05761742	14.06139368	13.39645649	13.32631466	13.11860114	12.75225113	14.08861393
ENSMUSG00000018585	46.546467	45.87703391	37.73803282	29.22216	35.863075	40.505524	53.05387157	56.22736738	52.2043579	56.888912	50.787281	45.726887
ENSMUSG00000018589	2.720142	3.262245	2.75447	2.980462	2.307412	3.020581	16.551804	16.480291	16.346266	15.348286	15.77211	18.651913
ENSMUSG00000018593	81.12787452	82.2115709	76.96295343	80.4698919	72.4232635	69.39753655	82.75966549	78.36332584	92.37999534	102.6037328	94.48900159	79.16513451
ENSMUSG00000018595	0.024895223	0.011183675	0	0	0	0	0.077584298	0	0	0	0	0.033773296
ENSMUSG00000018599	5.75326417	4.105309199	4.495870384	3.807312233	4.247880712	4.583202613	5.415419653	6.640515661	6.035963615	7.799381628	5.560097264	6.088673595
ENSMUSG00000018604	0.389560565	0.409464809	0.368282359	0.457449929	0.604724872	0.374004435	0.533846188	0.44413022	0.305264561	0.21904649	0.37458371	0.172950882
ENSMUSG00000018620	0	0	0	0	0	0	0	0	0	0	0	0
ENSMUSG00000018623	0	0	0	0	0	0	0	0	0	0	0	0
ENSMUSG00000018634	2.983543	2.382131	3.750307	2.87168	3.674088	3.616359	6.137398	6.245157	5.07696	5.050543	4.277757	4.462761
ENSMUSG00000018648	13.19180794	8.704370478	14.04072197	14.08843818	8.391108463	9.447724219	5.26080338	5.534898714	6.726683632	5.678454135	6.164605138	2.75639323
ENSMUSG00000018651	6.237435441	6.18981555	5.978082218	5.753642878	5.576193663	5.652629958	7.352104231	6.563124083	7.275869089	6.673210372	6.584764329	7.404471445
ENSMUSG00000018654	0.341086888	0.351215772	0.596233619	0.757383476	0.8244159	0.714058004	0.643667082	0.496142225	0.46929677	0.334569907	0.344355209	0.372881797
ENSMUSG00000018656	0	0	0	0	0	0	0	0	0.05030585	0	0	0
ENSMUSG00000018659	11.71730761	10.59092666	11.96837545	12.52270595	10.6432405	12.66382842	8.220981817	6.821693311	7.611277936	6.056718077	8.388543262	6.537726792
ENSMUSG00000018661	8.420273609	9.222226116	9.809787867	8.858021422	9.595801192	10.1805886	9.40897862	10.28881712	10.63203599	8.618046376	9.541719692	9.458743477
ENSMUSG00000018666	6.554393589	6.476131945	4.147069671	3.056034685	5.999822993	6.240873447	8.627848623	8.741006899	9.207052564	6.131924873	7.818731498	8.280772246
ENSMUSG00000018669	5.22582819	5.042547404	5.158825362	4.455212654	5.741631955	5.657936593	8.207831386	7.396821019	7.252354069	7.937565232	7.086650927	8.357831004
ENSMUSG00000018672	2.066438689	2.042545837	1.649045478	2.247486265	2.128867339	1.460758506	1.201171677	1.031909075	1.001317789	1.1363378	1.391980594	1.065840073
ENSMUSG00000018677	16.74334019	16.63952565	13.79687267	16.61594876	17.58690248	13.27622318	15.21541514	17.23606144	17.66234774	17.18008843	16.45014263	17.01542884
ENSMUSG00000018678	4.707203776	5.407422482	6.189181233	4.792461428	4.997805706	4.997980895	4.0133008	3.552998109	4.589708869	5.381245589	4.618678574	4.936879105
ENSMUSG00000018697	3.783315738	3.248341005	3.504052321	3.052969471	3.357965035	3.739253454	4.894383946	5.427444461	4.90452516	6.252558344	5.887549339	6.870951835
ENSMUSG00000018698	0.03473584	0.132098577	0.106928291	0.095983768	0.088000862	0.022156058	0.362921562	0.491460619	0.659019854	0.51192319	0.602432739	0.593132606
ENSMUSG00000018707	30.28998598	34.53530478	34.42786805	34.84378178	36.4001347	35.28288362	51.44779423	41.37408888	51.84966265	50.83629725	41.4277958	48.8793344
ENSMUSG00000018727	0.052877504	0.050777752	0.034955365	0.051211886	0.161906408	0.065070681	0.019229185	0.07404434	0.124061691	0.019142865	0.015417019	0.006475234
ENSMUSG00000018733	1.92127903	2.329724545	2.026835332	1.528462761	1.595556469	1.941554939	2.217112273	1.854612361	2.099394976	2.019725579	2.082385901	2.148053265
ENSMUSG00000018736	21.24245493	20.62728336	22.54234158	26.64358849	23.74118602	22.49516782	26.43528133	24.25709242	23.1259005	22.51242573	22.60152117	24.5550304
ENSMUSG00000018740	2.05339249	2.342693228	1.450714346	2.273344168	1.747503781	1.806123376	1.202892644	0.833839331	1.273076849	1.222884575	0.920977776	1.033600832
ENSMUSG00000018750	10.68159939	10.36350503	11.03973806	11.64612708	10.86842973	10.56030958	6.821186181	5.965057793	6.249236092	6.279432163	5.659012463	4.997152795
ENSMUSG00000018752	1.66682251	2.064098369	1.38257855	1.708631295	0.979102987	1.29213257	0.909344221	0.463162114	0.844437718	0.644434	0.891597966	0.35655
ENSMUSG00000018761	9.697525166	9.552552071	8.691675488	8.468403205	9.459787975	9.215649288	15.43594726	14.63897047	13.68735445	18.73395853	14.48720202	13.31172028
ENSMUSG00000018765	27.10568165	26.54780353	28.53194608	29.06221292	29.43388188	31.63052898	19.10294025	18.94491085	19.76629452	19.77905065	18.50699556	20.60263183
ENSMUSG00000018770	69.52242002	64.65466434	66.15543288	45.69757121	52.22856007	64.136849	73.86659034	74.36708007	67.28782458	74.75290959	67.63148918	72.96049295
ENSMUSG00000018774	4.685199842	5.219786659	6.397181551	4.18200442	5.200742134	4.928070138	4.196475862	3.762220134	3.673032024	3.789015905	3.453130654	4.163711647
ENSMUSG00000018776	0.17484	0.143112	0.113761	0	0.162959	0.36715	0.299193	0.153778	0.071131	0.269513	0.15374	0
ENSMUSG00000018796	4.615837013	4.675001169	2.597838345	4.259674847	4.65288808	4.326366303	4.080373858	3.623021964	3.967638688	4.990705106	4.743491252	4.963075313
ENSMUSG00000018800	2.919466814	3.795973687	3.058503829	3.576404444	3.752296465	3.326782231	2.07711227	1.870354794	2.289814195	2.433932416	2.191597955	2.323274263
ENSMUSG00000018809	2.335433401	2.497266118	2.236502306	2.255859594	2.361188716	2.371343201	2.433906299	2.675231755	2.276874794	2.636356751	2.308490856	2.520398485
[truncated: 51,802 more rows]
