# Supplementary material for: Egr2 Upregulation Induced Mitochondrial Iron Overload Implicating in Cognitive Deficits after Sevoflurane Administration
Source: Research Square preprint supplement (doi:10.21203/rs.3.rs-104467/v1), 2020-11-13
Supplement: Supplementary file 4 [file f2fdc28ed01acc2be4710fbb.csv]

id	name	log2FC	pval	fdr	regulate	significant	mean_P30-sev	mean_P30-com	count_P30-sev-1	count_P30-sev-2	count_P30-sev-3	count_P30-com-1	count_P30-com-2	count_P30-com-3	fpkm_P30-sev-1	fpkm_P30-sev-2	fpkm_P30-sev-3	fpkm_P30-com-1	fpkm_P30-com-2	fpkm_P30-com-3	gene_description
ENSMUSG00000098650	Gm28048	5.945455932	5.32E-10	3.85E-07	up	yes	6.062551667	0	1156	0	1082	0	0	0	9.187984	0	8.999671	0	0	0	_
ENSMUSG00000096764	Gm21985	4.762086194	2.01E-52	3.27E-48	up	yes	2.613506	0	651	690	259	0	0	0	3.131257	3.405788	1.303473	0	0	0	_
ENSMUSG00000103144	Pcdhga1	3.971070856	1.24E-08	5.44E-06	up	yes	18.31917869	1.074515679	3620	398	9057	217	313	369	14.72200215	1.655810509	38.57972341	0.712326206	1.122150038	1.389070792	protocadherin gamma subfamily A, 1 [Source:HGNC Symbol;Acc:HGNC:8696]
ENSMUSG00000038155	Gstp2	3.799219499	0.000312942	0.035664482	up	yes	7.280109	0.430131667	193	220	338	0	52	0	5.443897	6.385488	10.010942	0	1.290395	0	Glutathione S-transferase P 2 [Source:UniProtKB/Swiss-Prot;Acc:P46425]
ENSMUSG00000099913	Gm28551	3.358188542	7.59E-11	6.51E-08	up	yes	1.932532	0.098208333	346	164	307	0	26	22	2.401703	1.165096	2.230797	0	0.159256	0.135369	predicted gene 28551 [Source:MGI Symbol;Acc:MGI:5579257]
ENSMUSG00000026822	Lcn2	3.139699695	1.10E-18	3.58E-15	up	yes	1.192179278	0.046615196	163	122	143	6	13	2	1.339823053	1.017708484	1.219006296	0.040443845	0.083964958	0.015436787	Neutrophil gelatinase-associated lipocalin [Source:UniProtKB/Swiss-Prot;Acc:P11672]
ENSMUSG00000021250	Fos	2.943073986	7.11E-38	5.80E-34	up	yes	15.30452299	1.903063444	1688	1526	1623	175	300	232	15.6506339	14.50140201	15.76153306	1.297475388	2.432850102	1.978864842	Proto-onco c-Fos [Source:UniProtKB/Swiss-Prot;Acc:P01101]
ENSMUSG00000079017	Ifi27l2a	2.913515281	1.06E-07	3.67E-05	up	yes	9.906428	1.228078	311	132	176	17	62	12	14.659348	6.370936	8.689	0.610998	2.557842	0.515394	Interferon alpha-inducible protein 27-like protein 2A [Source:UniProtKB/Swiss-Prot;Acc:Q8R412]
ENSMUSG00000078886	Gm2026	2.790711835	8.17E-08	2.89E-05	up	yes	0.591971124	0	0	107	133	0	0	0	0	0.783607274	0.992306097	0	0	0	_
ENSMUSG00000078901	Gm14440	2.696715722	4.32E-08	1.68E-05	up	yes	0.548324333	0	134	119	0	0	0	0	0.861659	0.783314	0	0	0	0	_
ENSMUSG00000116417	CT025619.2	2.651407656	7.81E-10	5.09E-07	up	yes	0.52828	0	89	143	3	0	0	0	0.59007	0.977225	0.017545	0	0	0	_
ENSMUSG00000096862	Gm13301	2.478849311	1.43E-07	4.74E-05	up	yes	0.457452667	0	79	74	0	0	0	0	0.698771	0.673587	0	0	0	0	predicted gene 13301 [Source:MGI Symbol;Acc:MGI:3707230]
ENSMUSG00000037868	Egr2	2.399540783	1.23E-15	2.11E-12	up	yes	2.389865041	0.371891393	308	367	414	84	79	40	1.972766851	2.416974111	2.779854161	0.433473751	0.444910553	0.237289875	E3 SUMO-protein ligase EGR2 [Source:UniProtKB/Swiss-Prot;Acc:P08152]
ENSMUSG00000066952	Myo1h	2.252621038	3.24E-06	0.00072253	up	yes	1.374116507	0.209332327	498	65	535	61	89	48	1.823935221	0.239089467	2.059324833	0.180058937	0.286529683	0.16140836	Unconventional myosin-Ih [Source:UniProtKB/Swiss-Prot;Acc:Q9D6A1]
ENSMUSG00000003545	Fosb	2.228055536	6.76E-18	1.79E-14	up	yes	3.966229435	0.76792127	1285	902	1145	336	160	267	4.488565884	3.224739977	4.185382444	0.94946828	0.489517497	0.864778032	Protein fosB [Source:UniProtKB/Swiss-Prot;Acc:P13346]
ENSMUSG00000035370	Adat3	2.194166066	0.000120019	0.016032404	up	yes	3.014085373	0.58048838	214	178	1414	143	162	113	1.021380555	0.875962278	7.144913287	0.556642208	0.685190106	0.499632825	Probable inactive tRNA-specific adenosine deaminase-like protein 3 [Source:UniProtKB/Swiss-Prot;Acc:Q6PAT0]
ENSMUSG00000107482	Gm45233	2.192298392	0.014415895	0.503346393	up	no	2.554583992	0.480829807	62	95	178	0	69	5	1.356669161	2.162701826	4.144380989	0	1.349204404	0.093285018	_
ENSMUSG00000034459	Ifit1	2.071294031	8.05E-09	3.86E-06	up	yes	2.384516333	0.491180667	339	282	233	42	113	50	2.77865	2.374099	2.0008	0.277283	0.815639	0.38062	Interferon-induced protein with tetratricopeptide repeats 1 [Source:UniProtKB/Swiss-Prot;Acc:Q64282]
ENSMUSG00000024066	Xdh	2.067732922	2.10E-11	2.02E-08	up	yes	2.092359333	0.422952333	425	425	439	88	163	57	2.017759	2.072387	2.186932	0.338109	0.683288	0.24746	xanthine dehydrogenase [Source:MGI Symbol;Acc:MGI:98973]
ENSMUSG00000046093	Hpcal4	2.063616264	1.59E-06	0.000386673	up	yes	138.8503522	33.13910007	48279	9170	42211	6166	10792	10552	197.363474	38.46413786	180.7234447	20.41415988	38.99499328	40.00814705	hippocalcin-like 4 [Source:MGI Symbol;Acc:MGI:2157521]
ENSMUSG00000078922	Tgtp1	2.052691118	1.94E-08	8.12E-06	up	yes	2.62589265	0.557032951	353	444	333	63	166	53	2.40365458	3.099053287	2.374970082	0.342900694	0.996211597	0.331986562	T-cell-specific guanine nucleotide triphosphate-binding protein 1 [Source:UniProtKB/Swiss-Prot;Acc:Q62293]
ENSMUSG00000033880	Lgals3bp	2.051971912	2.19E-09	1.28E-06	up	yes	18.22881341	4.320071091	3407	1853	1747	698	973	288	26.1123908	14.56695105	14.00709839	4.324575658	6.591410761	2.044226853	Galectin-3-binding protein [Source:UniProtKB/Swiss-Prot;Acc:Q07797]
ENSMUSG00000078921	Tgtp2	1.95027933	1.11E-09	6.93E-07	up	yes	1.953130447	0.431280609	212	321	238	81	81	42	1.571712001	2.441403176	1.846276164	0.47935405	0.530521879	0.283965899	T-cell-specific guanine nucleotide triphosphate-binding protein 1 [Source:UniProtKB/Swiss-Prot;Acc:Q62293]
ENSMUSG00000059005	Hnrnpa3	1.792692187	0.011950798	0.453764358	up	no	7.202689784	2.007796752	222	4388	590	776	305	641	0.896727756	18.21198146	2.499360136	2.537237185	1.084796114	2.401356957	Heteroous nuclear ribonucleoprotein A3 [Source:UniProtKB/Swiss-Prot;Acc:Q8BG05]
ENSMUSG00000052336	Cx3cr1	1.777930132	1.78E-05	0.003294886	up	yes	5.77708997	1.613768039	355	1738	1377	333	343	463	1.712279262	8.636242817	6.982747832	1.304881762	1.463779216	2.07264314	CX3C chemokine receptor 1 [Source:UniProtKB/Swiss-Prot;Acc:Q9Z0D9]
ENSMUSG00000103472	Pcdhga7	1.773249574	0.000733581	0.066788655	up	no	9.540427059	2.720297754	473	4387	1786	595	590	1023	1.972643605	18.82880093	7.819836648	2.013155079	2.181357658	3.966380526	protocadherin gamma subfamily A, 7 [Source:MGI Symbol;Acc:MGI:1935219]
ENSMUSG00000026276	2-Sep	1.771186528	0.005080049	0.269672832	up	no	4.263036251	1.178228653	1761	2652	197	950	415	181	4.805931487	7.436596791	0.546580477	2.095537702	0.992012902	0.447135354	septin 2 [Source:MGI Symbol;Acc:MGI:97298]
ENSMUSG00000033355	Rtp4	1.763308773	1.61E-06	0.000386673	up	yes	2.529748053	0.674649616	285	320	123	95	65	70	2.918440564	3.35934117	1.311462425	0.780132709	0.580935781	0.662880359	Receptor-transporting protein 4 [Source:UniProtKB/Swiss-Prot;Acc:Q9ER80]
ENSMUSG00000017697	Ada	1.757664751	0.000581353	0.056394747	up	no	0.59744977	0.106254353	54	47	61	11	25	0	0.5819988	0.524026194	0.686324316	0.086667275	0.232095784	0	Adenosine deaminase [Source:UniProtKB/Swiss-Prot;Acc:P03958]
ENSMUSG00000045903	Npas4	1.743011796	1.11E-13	1.29E-10	up	yes	5.512599333	1.576738	778	815	832	207	326	275	5.17548	5.563653	5.798665	1.116634	1.919388	1.694192	Neuronal PAS domain-containing protein 4 [Source:UniProtKB/Swiss-Prot;Acc:Q8BGD7]
ENSMUSG00000004328	Hif3a	1.677616515	8.80E-09	4.06E-06	up	yes	1.367134747	0.358624351	394	420	421	97	202	81	1.276705311	1.394544741	1.430154188	0.254994236	0.576818549	0.244060269	Hypoxia-inducible factor 3-alpha [Source:UniProtKB/Swiss-Prot;Acc:Q0VBL6]
ENSMUSG00000025498	Irf7	1.631865442	8.29E-11	6.76E-08	up	yes	2.396800566	0.705644427	378	460	388	123	168	135	2.163056597	2.711366494	2.315978608	0.561545924	0.841136089	0.714251268	interferon regulatory factor 7 [Source:MGI Symbol;Acc:MGI:1859212]
ENSMUSG00000030107	Usp18	1.618574744	1.03E-05	0.002074199	up	yes	1.192460535	0.320898854	103	195	152	65	54	30	0.790669552	1.559660854	1.227051199	0.400465349	0.360694959	0.201536252	ubiquitin specific peptidase 18 [Source:MGI Symbol;Acc:MGI:1344364]
ENSMUSG00000022602	Arc	1.563907664	3.44E-19	1.40E-15	up	yes	81.57445182	27.52505242	9171	12851	11383	4586	3821	4825	65.47120429	94.14323582	85.10891534	26.51843501	24.11110941	31.94561285	Activity-regulated cytoskeleton-associated protein [Source:UniProtKB/Swiss-Prot;Acc:Q9WV31]
ENSMUSG00000037095	Lrg1	1.546090516	3.79E-05	0.006177806	up	yes	1.616936	0.487942	126	99	70	38	28	39	2.034372	1.638086	1.17835	0.494239	0.399543	0.570044	leucine rich alpha-2-glycoprotein 1 [Source:HGNC Symbol;Acc:HGNC:29480]
ENSMUSG00000048924	Ccdc125	1.52751922	0.000289399	0.033449132	up	yes	0.496828132	0.107023755	67	69	31	7	28	9	0.585238993	0.619460786	0.285784618	0.043474586	0.212464072	0.065132608	Coiled-coil domain-containing protein 125 [Source:UniProtKB/Swiss-Prot;Acc:Q5U465]
ENSMUSG00000040441	Slc26a10	1.521295635	0.028538895	0.682416538	up	no	2.52843794	0.815676585	77	101	1168	206	190	130	0.412513162	0.552479855	6.620320803	0.899713656	0.901279379	0.646036721	solute carrier family 26 member 10 [Source:HGNC Symbol;Acc:HGNC:14470]
ENSMUSG00000073409	H2-Q6	1.517656557	2.49E-05	0.004358276	up	yes	1.387878461	0.419645667	120	182	89	54	48	38	1.249940919	1.946288465	0.967406	0.453187	0.43908	0.36667	histocompatibility 2, Q region locus 6 [Source:MGI Symbol;Acc:MGI:95935]
ENSMUSG00000025453	Nnt	1.505422078	0.0017741	0.125239141	up	no	2.820281585	0.928602388	1313	158	1204	311	369	350	4.066119653	0.493529472	3.90119563	0.774175186	1.009515069	1.002116908	_
ENSMUSG00000074874	Ctla2b	1.501849374	0.001532013	0.11558895	up	no	0.802834976	0.21879145	33	90	66	8	33	20	0.39101647	1.152627611	0.864860847	0.080860832	0.347923822	0.227589695	Protein CTLA-2-beta [Source:UniProtKB/Swiss-Prot;Acc:P12400]
ENSMUSG00000079362	Gm43302	1.49099	0.004892398	0.2640113	up	no	0.252797	0.025514	77	72	0	12	7	0	0.388276	0.370115	0	0.048445	0.028097	0	_
ENSMUSG00000058883	Zfp708	1.490621117	0.09726846	1	up	no	1.008818214	0.294583284	144	113	102	126	6	0	1.182246976	0.95939561	0.884812056	0.839778285	0.043971567	0	zinc finger protein 708 [Source:MGI Symbol;Acc:MGI:3040674]
ENSMUSG00000029561	Oasl2	1.483671279	5.43E-10	3.85E-07	up	yes	1.254769041	0.384435214	379	408	298	134	143	116	1.28011557	1.423876587	1.060314965	0.366685604	0.422492551	0.364127486	2'-5'-oligoadenylate synthase-like protein 2 [Source:UniProtKB/Swiss-Prot;Acc:Q9Z2F2]
ENSMUSG00000035692	Isg15	1.459080833	7.02E-05	0.01030107	up	yes	4.850466333	1.700607333	170	212	112	76	52	76	4.90777	6.263857	3.379772	1.772753	1.310586	2.018483	Ubiquitin-like protein ISG15 [Source:UniProtKB/Swiss-Prot;Acc:Q64339]
ENSMUSG00000015312	Gadd45b	1.432157483	2.34E-11	2.12E-08	up	yes	11.53988468	4.213465379	875	821	772	429	326	311	11.99178111	11.55600713	11.07186578	4.754637336	3.941120916	3.944637887	Growth arrest and DNA damage-inducible protein GADD45 beta [Source:UniProtKB/Swiss-Prot;Acc:P22339]
ENSMUSG00000072620	Slfn2	1.420406176	2.08E-05	0.003769516	up	yes	2.537506	0.885391	162	227	178	95	94	48	2.122871	3.044499	2.445148	1.002618	1.081554	0.572001	schlafen 2 [Source:MGI Symbol;Acc:MGI:1313258]
ENSMUSG00000089865	Gm44503	1.415458499	0.276778609	1	up	no	0.422858333	0.096014667	255	0	0	0	0	63	1.268575	0	0	0	0	0.288044	_
ENSMUSG00000046718	Bst2	1.41537984	2.27E-08	9.25E-06	up	yes	16.46020701	6.108604199	643	623	729	298	376	200	15.52082757	15.44444468	18.41534879	5.831450392	8.022407442	4.471954764	Bone marrow stromal antigen 2 [Source:UniProtKB/Swiss-Prot;Acc:Q8R2Q8]
ENSMUSG00000052776	Oas1a	1.403610356	5.26E-05	0.00832105	up	yes	1.107515	0.356419	113	83	87	39	28	40	1.300811	0.977422	1.044312	0.359254	0.28663	0.423373	2'-5'-oligoadenylate synthase 1A [Source:UniProtKB/Swiss-Prot;Acc:P11928]
ENSMUSG00000052837	Junb	1.395698495	7.29E-22	3.96E-18	up	yes	53.79033045	20.38159313	5828	5252	5535	2483	2272	2618	55.27471777	51.10877405	54.98749953	19.07112166	19.04278664	23.0308711	Transcription factor jun-B [Source:UniProtKB/Swiss-Prot;Acc:P09450]
ENSMUSG00000002831	Plin4	1.384433145	1.03E-06	0.000259195	up	yes	0.730356089	0.218059572	156	216	195	61	91	48	0.585928319	0.836675588	0.76846436	0.185618795	0.301605035	0.166954887	Perilipin-4 [Source:UniProtKB/Swiss-Prot;Acc:O88492]
ENSMUSG00000078606	Gm4070	1.367691501	1.97E-07	6.07E-05	up	yes	0.860720552	0.272289609	363	376	335	94	196	108	0.853462957	0.906280907	0.822417792	0.177620953	0.404203064	0.23504481	Interferon-induced very large GTPase 1 [Source:UniProtKB/Swiss-Prot;Acc:Q80SU7]
ENSMUSG00000083621	Gm14586	1.359805835	0.00766381	0.354821329	up	no	2.519380667	0.920601667	22	63	54	20	26	15	1.13414	3.442152	2.98185	0.827972	1.22557	0.708263	predicted gene 14586 [Source:MGI Symbol;Acc:MGI:3705507]
ENSMUSG00000071341	Egr4	1.358191156	1.29E-15	2.11E-12	up	yes	30.76817967	11.94078333	3074	3142	2661	1392	1159	1482	31.234209	32.754776	28.315554	11.4532	10.408527	13.960623	Early growth response protein 4 [Source:UniProtKB/Swiss-Prot;Acc:Q9WUF2]
ENSMUSG00000028862	Map3k6	1.356860234	1.35E-06	0.000334132	up	yes	1.458648431	0.508544773	253	329	323	132	158	84	1.18814562	1.59256428	1.595235392	0.501321905	0.6607968	0.363515613	mitogen-activated protein kinase kinase kinase 6 [Source:HGNC Symbol;Acc:HGNC:6858]
ENSMUSG00000085711	Gm15163	1.337329394	0.000806887	0.072651045	up	no	2.37106	0.877928333	162	96	158	91	37	56	2.709525	1.639185	2.76447	1.223982	0.54421	0.865593	predicted gene 15163 [Source:MGI Symbol;Acc:MGI:3642430]
ENSMUSG00000034422	Parp14	1.332822778	4.24E-08	1.68E-05	up	yes	0.809131932	0.260916949	318	416	281	143	148	96	0.741062705	0.996450074	0.689883018	0.268843446	0.306274439	0.207632961	Poly [ADP-ribose] polymerase 14 [Source:UniProtKB/Swiss-Prot;Acc:Q2EMV9]
ENSMUSG00000044595	Dnd1	1.329944081	0.000493439	0.051881183	up	no	0.667704094	0.205380144	96	37	89	26	28	27	0.853422752	0.327800315	0.821889216	0.183453385	0.216077615	0.216609432	Dead end protein homolog 1 [Source:UniProtKB/Swiss-Prot;Acc:Q6VY05]
ENSMUSG00000030921	Trim30a	1.321099363	7.77E-06	0.001603832	up	yes	1.125724256	0.390571422	218	246	161	65	99	89	1.151338332	1.335134508	0.890699926	0.277662557	0.460183681	0.433868027	Mus musculus tripartite motif-containing 30A (Trim30a), transcript variant 2, mRNA. [Source:RefSeq mRNA;Acc:NM_001357467]
ENSMUSG00000045868	Gvin1	1.32077256	5.33E-08	2.02E-05	up	yes	0.875785078	0.290626781	360	379	323	119	187	108	0.869540868	0.939141779	0.818672586	0.231786	0.398972654	0.241121689	_
ENSMUSG00000026628	Atf3	1.301305794	0.000977185	0.083377908	up	no	0.949642429	0.325901628	44	122	108	36	44	31	0.44302241	1.260737129	1.145167747	0.294624921	0.393213326	0.289866637	Cyclic AMP-dependent transcription factor ATF-3 [Source:UniProtKB/Swiss-Prot;Acc:Q60765]
ENSMUSG00000093989	Rnasek	1.298063546	4.89E-05	0.007811072	up	yes	60.86760687	24.69379948	1045	3105	3034	1375	1076	1016	25.75213527	78.52972496	78.32096037	27.44187157	23.4334454	23.20608147	ribonuclease, RNase K [Source:MGI Symbol;Acc:MGI:106369]
ENSMUSG00000032567	Aste1	1.286870345	3.97E-05	0.006405351	up	yes	1.186673938	0.427329333	199	491	393	196	121	152	0.626295972	1.615443427	1.318282415	0.503904514	0.333835845	0.444247639	1 [Source:UniProtKB/Swiss-Prot;Acc:Q8BIR2]
ENSMUSG00000027514	Zbp1	1.286347147	1.34E-05	0.002601453	up	yes	0.284423333	0.057608873	39	56	41	9	16	8	0.23642738	0.35312461	0.263718008	0.04008129	0.08692675	0.045818579	Z-DNA binding protein 1 [Source:MGI Symbol;Acc:MGI:1927449]
ENSMUSG00000107062	Gm43580	1.284408238	0.147785502	1	up	no	7.382421333	2.971827	133	136	16	123	8	11	10.183078	10.698852	1.265334	7.650083	0.497764	0.767634	predicted gene 43580 [Source:MGI Symbol;Acc:MGI:5663717]
ENSMUSG00000002325	Irf9	1.282182926	7.25E-10	4.92E-07	up	yes	3.019714212	1.182741929	725	671	795	345	375	296	2.925562312	2.776147955	3.357432369	1.118830382	1.330769814	1.098625591	Interferon regulatory factor 9 [Source:UniProtKB/Swiss-Prot;Acc:Q61179]
ENSMUSG00000024737	Slc15a3	1.266915249	0.0172088	0.545152664	up	no	8.019723439	3.274129487	565	2605	2690	337	803	1607	2.242576242	10.62175607	11.19483801	1.081461331	2.82003351	5.92089362	Solute carrier family 15 member 3 [Source:UniProtKB/Swiss-Prot;Acc:Q8BPX9]
ENSMUSG00000109118	Gm32031	1.25826926	0.002825	0.174444653	up	no	1.591273758	0.607028826	54	61	51	32	29	16	1.545741221	1.766744057	1.461335997	0.70369365	0.711854191	0.405538638	predicted gene, 32031 [Source:MGI Symbol;Acc:MGI:5591190]
ENSMUSG00000003032	Klf4	1.249562446	5.17E-07	0.000142828	up	yes	3.636821672	1.471616557	522	541	430	230	301	180	3.727101306	3.966157198	3.217206511	1.327091207	1.897948286	1.189810178	Krueppel-like factor 4 [Source:UniProtKB/Swiss-Prot;Acc:Q60793]
ENSMUSG00000035929	H2-Q4	1.248794436	1.40E-05	0.002676517	up	yes	3.279099606	1.321924083	363	437	345	217	226	106	3.050057864	3.759941894	3.027299059	1.472894347	1.669746551	0.823131352	_
ENSMUSG00000060550	H2-Q7	1.247739499	0.000149383	0.019169219	up	yes	0.425733987	0.121390529	89	101	59	44	19	25	0.448525033	0.518024427	0.310652499	0.169543801	0.076334654	0.118293131	Mus musculus histocompatibility 2, Q region locus 9 (H2-Q9), mRNA. [Source:RefSeq mRNA;Acc:NM_001201460]
ENSMUSG00000038418	Egr1	1.241454121	8.96E-16	1.83E-12	up	yes	50.60478333	21.34539267	9348	10596	10473	4622	4882	5495	45.499481	52.922958	53.391911	18.221481	21.008226	24.806471	Early growth response protein 1 [Source:UniProtKB/Swiss-Prot;Acc:P08046]
ENSMUSG00000023032	Slc4a8	1.236616835	6.79E-08	2.46E-05	up	yes	7.185027511	2.991522671	2725	5102	4688	1588	2297	2204	4.561316725	8.769694495	8.224071314	2.151004698	3.401268391	3.422294924	solute carrier family 4 (anion exchanger), member 8 [Source:MGI Symbol;Acc:MGI:1928745]
ENSMUSG00000116075	AC102103.1	1.236564613	0.004292014	0.239544344	up	no	6.499941333	2.700896333	72	116	65	29	46	48	5.390233	8.973394	5.136197	1.749157	3.058884	3.294648	_
ENSMUSG00000099227	Mir8114	1.221539701	0.460255998	1	up	no	284.1464653	121.791938	2125	2151	4	3	3	1999	417.692749	433.993774	0.752873	0.438385	0.430929	364.5065	microRNA 8114 [Source:MGI Symbol;Acc:MGI:5530764]
ENSMUSG00000023034	Nr4a1	1.21858461	1.07E-14	1.34E-11	up	yes	25.78064005	11.0210167	3699	3714	4709	2113	1889	2090	22.99322685	23.68780839	30.66088492	10.63597966	10.37606988	12.05100054	nuclear receptor subfamily 4, group A, member 1 [Source:MGI Symbol;Acc:MGI:1352454]
ENSMUSG00000028214	Gem	1.217847325	0.001743269	0.12406134	up	no	1.347788718	0.522438737	95	124	163	32	70	70	0.981654274	1.302902686	1.758809194	0.265415538	0.63672957	0.665171104	GTP-binding protein GEM [Source:UniProtKB/Swiss-Prot;Acc:P55041]
ENSMUSG00000024042	Sik1	1.197033453	6.01E-08	2.22E-05	up	yes	4.620719333	1.959042	1069	885	849	511	568	324	5.170445	4.389631	4.302082	2.000422	2.425867	1.450837	Serine/threonine-protein kinase SIK1 [Source:UniProtKB/Swiss-Prot;Acc:Q60670]
ENSMUSG00000115819	AC108858.2	1.18019911	0.007413351	0.348245814	up	no	0.791478333	0.293401	83	30	40	21	30	16	1.26703	0.467939	0.639466	0.248813	0.404072	0.227318	_
ENSMUSG00000042138	Msantd2	1.171036527	0.000285912	0.033282199	up	yes	0.939519622	0.361652903	173	143	105	80	61	55	1.136488128	0.962468399	0.719602339	0.421184166	0.337706015	0.326068528	Myb/SANT-like DNA-binding domain-containing protein 2 [Source:UniProtKB/Swiss-Prot;Acc:Q6NZR2]
ENSMUSG00000058447	Gm26920	1.162947897	0.193536769	1	up	no	0.531118667	0.181857	44	45	81	0	0	64	0.401891	0.416394	0.775071	0	0	0.545571	_
ENSMUSG00000028268	Gbp3	1.144052113	2.42E-06	0.000555705	up	yes	3.032836116	1.31756726	441	418	475	188	265	225	2.936853303	2.856301655	3.305353392	1.005393205	1.560649639	1.386658936	Mus musculus guanylate binding protein 3 (Gbp3), transcript variant 4, mRNA. [Source:RefSeq mRNA;Acc:NM_001355403]
ENSMUSG00000043659	Npsr1	1.142426555	0.00087943	0.07747064	up	no	0.41738603	0.134374326	95	64	65	12	36	34	0.518365174	0.361429482	0.372363433	0.05376764	0.175734072	0.173621267	Neuropeptide S receptor [Source:UniProtKB/Swiss-Prot;Acc:Q8BZP8]
ENSMUSG00000024190	Dusp1	1.135739593	1.63E-09	9.84E-07	up	yes	9.753164511	4.384190448	1317	1015	1204	668	588	612	10.64377542	8.413798895	10.20191922	4.370283702	4.196369807	4.585917835	Dual specificity protein phosphatase 1 [Source:UniProtKB/Swiss-Prot;Acc:P28563]
ENSMUSG00000103793	Pcdhga6	1.134747766	0.012529642	0.465137984	up	no	5.088607667	2.262967333	391	2240	594	599	507	582	1.802894	10.598226	2.864703	2.234313	2.065539	2.48905	protocadherin gamma subfamily A, 6 [Source:HGNC Symbol;Acc:HGNC:8704]
ENSMUSG00000037465	Klf10	1.133779623	4.25E-09	2.23E-06	up	yes	7.309825701	3.276807605	1183	1535	1378	853	661	661	6.173802256	8.219980208	7.535694639	3.598690065	3.041744193	3.189988559	Mus musculus Kruppel-like factor 10 (Klf10), transcript variant 3, mRNA. [Source:RefSeq mRNA;Acc:NM_001357677]
ENSMUSG00000091243	Vgll3	1.130780051	0.009208058	0.392827401	up	no	1.243847531	0.513693162	546	350	298	323	228	44	1.675474032	1.10165319	0.954415369	0.801972069	0.618576232	0.120531183	vestigial like family member 3 [Source:MGI Symbol;Acc:MGI:1920819]
ENSMUSG00000114321	Gm8971	1.120274729	0.018908698	0.569351296	up	no	3.257488667	1.444465667	53	69	32	36	28	18	3.299947	4.411781	2.060738	1.796378	1.497632	1.039387	predicted gene 8971 [Source:MGI Symbol;Acc:MGI:3648536]
ENSMUSG00000059645	Gm7361	1.118419325	0.000961294	0.082453758	up	no	0.315268667	0.091272	52	28	48	20	17	9	0.375174	0.205792	0.36484	0.116652	0.103086	0.054078	_
ENSMUSG00000091549	Gm6548	1.11249391	0.000277348	0.032517552	up	yes	3.252237	1.450389	174	185	151	103	80	86	3.257228	3.548584	2.950899	1.559239	1.309549	1.482379	predicted gene 6548 [Source:MGI Symbol;Acc:MGI:3644071]
ENSMUSG00000109941	Exosc6	1.11160512	0.141041147	1	up	no	5.498100667	2.490682667	396	337	250	314	223	4	6.505421	5.680832	4.308049	4.18058	3.239416	0.052052	Exosome complex component MTR3 [Source:UniProtKB/Swiss-Prot;Acc:Q8BTW3]
ENSMUSG00000060143	Gm10076	1.102464043	0.031354871	0.702875284	up	no	48.76799176	22.65882026	178	1526	794	468	349	550	10.08910968	88.96428826	47.25057735	21.50401375	17.51601129	28.95643573	predicted gene 10076 [Source:MGI Symbol;Acc:MGI:3704451]
ENSMUSG00000096842	Gm10736	1.086215288	0.060775312	0.9036554	up	no	106.690285	50.19772733	59	658	392	187	159	267	16.410561	188.862778	114.797516	42.198067	39.142002	69.253113	predicted gene 10736 [Source:MGI Symbol;Acc:MGI:3704412]
ENSMUSG00000052751	Repin1	1.076564671	0.014396215	0.503346393	up	no	2.682653741	1.21941346	224	968	247	238	291	245	1.210085441	5.440192166	1.397683616	1.039190747	1.393304129	1.225745503	replication initiator 1 [Source:MGI Symbol;Acc:MGI:1889817]
ENSMUSG00000029009	Mthfr	1.07542979	3.72E-07	0.000108176	up	yes	3.314614395	1.520335854	1062	1157	1043	440	701	604	3.161518857	3.530574672	3.251749656	1.057737284	1.840030561	1.663239716	Methylenetetrahydrofolate reductase [Source:UniProtKB/Swiss-Prot;Acc:Q9WU20]
ENSMUSG00000074476	Spc24	1.064104202	0.008950947	0.385908969	up	no	0.53032919	0.201467248	63	66	58	12	29	44	0.526286904	0.556845769	0.507854896	0.074775237	0.203396957	0.326229549	Kinetochore protein Spc24 [Source:UniProtKB/Swiss-Prot;Acc:Q9D083]
ENSMUSG00000026393	Nek7	1.05591211	0.002830944	0.174444653	up	no	6.465980736	3.058190963	2251	2217	1942	2279	880	517	6.656302834	6.727873252	6.013766121	5.460323266	2.297621842	1.416627779	Serine/threonine-protein kinase Nek7 [Source:UniProtKB/Swiss-Prot;Acc:Q9ES74]
ENSMUSG00000091228	Gm20390	1.05575943	0.529678678	1	up	no	0.965085667	0.412353	132	0	0	70	0	0	2.895257	0	0	1.237059	0	0	_
ENSMUSG00000064288	Hist1h4k	1.050660457	0.01746434	0.547690146	up	no	3.324683333	1.553256	52	48	41	23	30	25	3.599379	3.393137	2.981534	1.262209	1.79522	1.602339	Histone H4 [Source:UniProtKB/Swiss-Prot;Acc:P62806]
ENSMUSG00000048572	Tmem252	1.046091291	0.000351089	0.039487716	up	yes	1.674708333	0.759453	170	225	160	104	110	83	1.506662	2.037925	1.479538	0.742438	0.857232	0.678689	Transmembrane protein 252 [Source:UniProtKB/Swiss-Prot;Acc:Q8C353]
ENSMUSG00000007682	Dio2	1.039750788	2.99E-12	3.04E-09	up	yes	14.22347333	6.867102	3550	4078	3470	2017	2228	2034	13.324877	15.704712	13.640831	6.130746	7.391435	7.079125	Type II iodothyronine deiodinase [Source:UniProtKB/Swiss-Prot;Acc:Q9Z1Y9]
ENSMUSG00000024679	Ms4a6d	1.031443904	0.010826564	0.429295636	up	no	0.862513069	0.370880907	60	51	93	52	33	20	0.734858613	0.644738474	1.20794212	0.52665175	0.35308018	0.232910791	_
ENSMUSG00000055447	Cd47	1.027470705	0.002836585	0.174444653	up	no	11.00817693	5.349332235	5534	1951	1880	1499	2512	1277	19.23598842	6.953613686	6.834928688	4.217287566	7.715020341	4.115688799	Leukocyte surface antigen CD47 [Source:UniProtKB/Swiss-Prot;Acc:Q61735]
ENSMUSG00000025085	Ablim1	1.025461091	0.002246342	0.149397162	up	no	4.31693576	2.069834125	4269	1470	1275	1153	1465	1279	7.787734923	2.741526385	2.42154597	1.696507549	2.357614587	2.155380239	actin-binding LIM protein 1 [Source:MGI Symbol;Acc:MGI:1194500]
ENSMUSG00000034738	Nostrin	1.020014114	0.001912541	0.132632656	up	no	2.85647117	1.357870016	195	279	251	88	155	158	2.244651473	3.30440418	3.020357856	0.807620737	1.581863997	1.684125314	Nostrin [Source:UniProtKB/Swiss-Prot;Acc:Q6WKZ7]
ENSMUSG00000073591	Pcdhb22	1.019763974	0.074322444	0.953291103	up	no	1.559668	0.718543333	486	384	515	49	601	89	1.601899	1.298531	1.778574	0.130488	1.754004	0.271138	_
ENSMUSG00000097635	Gm26826	1.018145295	0.011761332	0.449219521	up	no	1.312532	0.597438667	58	109	80	68	33	34	0.900891	1.737333	1.299372	0.855098	0.456347	0.480871	predicted gene, 26826 [Source:MGI Symbol;Acc:MGI:5477320]
ENSMUSG00000097692	A230060F14Rik	1.009946815	0.017325299	0.547190698	up	no	1.059126567	0.475581166	113	62	96	20	57	62	1.293252365	0.727271711	1.156855625	0.185850221	0.582261164	0.658632113	RIKEN cDNA A230060F14 gene [Source:MGI Symbol;Acc:MGI:3642156]
ENSMUSG00000089837	Npcd	0.992352055	0.299904382	1	up	no	0.660853578	0.282448844	0	56	72	0	30	33	0	0.856031725	1.12652901	0	0.389467532	0.457879	_
ENSMUSG00000075256	Cerkl	0.990785035	0.005854366	0.295382655	up	no	1.304215221	0.606606554	362	285	288	110	307	92	1.48740219	1.190318536	1.234924937	0.358344022	1.113310072	0.34816557	ceramide kinase-like [Source:MGI Symbol;Acc:MGI:3037816]
ENSMUSG00000028037	Ifi44	0.988143283	0.000296412	0.034018452	up	no	0.352608534	0.128171801	94	114	85	56	43	28	0.333665014	0.413147877	0.311012712	0.1602779	0.132021507	0.092215996	Interferon-induced protein 44 [Source:UniProtKB/Swiss-Prot;Acc:Q8BV66]
ENSMUSG00000032265	Fam46a	0.986892493	2.13E-05	0.003809534	up	no	1.755346905	0.83614017	440	449	456	233	312	208	1.681390684	1.761963073	1.822686958	0.719506722	1.051694689	0.737219099	family with sequence similarity 46 member A [Source:HGNC Symbol;Acc:HGNC:18345]
ENSMUSG00000027322	Siglec1	0.984600112	2.66E-05	0.004517713	up	no	0.138814794	0.020688825	39	50	46	8	16	0	0.116402024	0.154834006	0.145208351	0.01976903	0.042297445	0	sialic acid binding Ig-like lectin 1, sialoadhesin [Source:MGI Symbol;Acc:MGI:99668]
ENSMUSG00000073489	Ifi204	0.981283787	0.000839765	0.075195852	up	no	0.227867493	0.066074329	47	23	41	10	16	12	0.28260712	0.142097319	0.258898041	0.049518421	0.080631809	0.068072757	Interferon-activable protein 204 [Source:UniProtKB/Swiss-Prot;Acc:P0DOV2]
ENSMUSG00000057596	Trim30d	0.981124439	0.00367218	0.213734002	up	no	0.564906417	0.236831453	138	73	78	35	61	46	0.795245151	0.432152848	0.46732125	0.159462476	0.312876431	0.238155451	tripartite motif-containing 30D [Source:MGI Symbol;Acc:MGI:3035181]
ENSMUSG00000097960	A330074K22Rik	0.977688801	0.003638086	0.212508563	up	no	0.992129667	0.454575333	139	116	79	62	68	51	1.217299	1.036581	0.722509	0.434837	0.520812	0.408077	RIKEN cDNA A330074K22 gene [Source:MGI Symbol;Acc:MGI:3045392]
ENSMUSG00000079737	3110001I22Rik	0.974374972	0.015216316	0.520546732	up	no	1.007619331	0.463734265	47	102	83	52	49	29	0.592552835	1.329362873	1.100942284	0.526759202	0.535211148	0.329232445	RIKEN cDNA 3110001I22 gene [Source:MGI Symbol;Acc:MGI:1913848]
ENSMUSG00000100863	Gm12669	0.973224053	0.046895218	0.833208589	up	no	0.831993	0.374726	15	45	54	24	25	13	0.305446	0.984639	1.205894	0.408871	0.463826	0.251481	predicted gene 12669 [Source:MGI Symbol;Acc:MGI:3651683]
ENSMUSG00000070327	Rnf213	0.968729771	1.56E-07	5.10E-05	up	no	1.460135539	0.697160207	1058	1177	1076	611	754	495	1.365434305	1.559868664	1.455103649	0.638981176	0.860466196	0.592033248	ring finger protein 213 [Source:MGI Symbol;Acc:MGI:1289196]
ENSMUSG00000040253	Gbp7	0.968166539	0.000142598	0.018591335	up	no	1.317979612	0.624807732	340	279	375	166	235	153	1.320033112	1.109840725	1.524065	0.520804	0.804698196	0.548921	_
ENSMUSG00000020641	Rsad2	0.960751708	0.002713103	0.170059397	up	no	0.565933983	0.242149646	99	107	124	54	80	34	0.498302567	0.548282604	0.651216778	0.216275123	0.353253973	0.156919843	Radical S-adenosyl methionine domain-containing protein 2 [Source:UniProtKB/Swiss-Prot;Acc:Q8CBB9]
ENSMUSG00000027692	Tnik	0.959368082	2.51E-10	1.95E-07	up	no	7.258109485	3.684144188	6543	7032	5253	3463	4036	3672	7.399115301	8.15675564	6.218457513	3.16861499	4.031981959	3.851835617	TRAF2 and NCK interacting kinase [Source:MGI Symbol;Acc:MGI:1916264]
ENSMUSG00000069874	Irgm2	0.955329628	0.000115551	0.015692839	up	no	2.439107476	1.209478012	490	329	393	243	269	195	2.897154349	1.994344485	2.425823593	1.161020741	1.401842673	1.065570623	_
ENSMUSG00000047907	Tshz2	0.946688316	8.91E-07	0.000230494	up	no	8.407407043	4.313830312	3405	2696	2699	1331	2042	1872	9.546419476	7.755770678	7.920030974	3.018640267	5.056455824	4.866394845	teashirt zinc finger family member 2 [Source:MGI Symbol;Acc:MGI:2153084]
ENSMUSG00000040495	Chrm4	0.943969711	1.75E-05	0.003294886	up	no	10.73361967	5.531322333	805	686	589	499	395	369	12.199594	10.656082	9.345183	6.118196	5.289521	5.18625	cholinergic receptor, muscarinic 4 [Source:MGI Symbol;Acc:MGI:88399]
ENSMUSG00000050370	Ch25h	0.943673905	0.100433905	1	up	no	0.703477333	0.317733667	36	50	42	4	16	46	0.5786	0.820866	0.710966	0.044355	0.227173	0.681673	Cholesterol 25-hydroxylase [Source:UniProtKB/Swiss-Prot;Acc:Q9Z0F5]
ENSMUSG00000043505	Gimap5	0.943557636	0.015427629	0.520546732	up	no	0.269146131	0.091937207	70	60	24	9	12	39	0.358858202	0.318478101	0.130102091	0.036028119	0.0552691	0.184514401	GTPase IMAP family member 5 [Source:UniProtKB/Swiss-Prot;Acc:Q8BWF2]
ENSMUSG00000050423	Ppp1r3g	0.942717967	0.001396037	0.107825687	up	no	2.828262991	1.423434172	427	342	260	227	140	240	3.455774825	2.833623619	2.195390529	1.478821893	0.995678731	1.795801892	Protein phosphatase 1 regulatory subunit 3G [Source:UniProtKB/Swiss-Prot;Acc:Q9CW07]
ENSMUSG00000040296	Ddx58	0.939636988	0.000189607	0.023953624	up	no	1.361553195	0.662001293	561	387	357	198	300	241	1.722016096	1.218398119	1.14424537	0.48708734	0.814063849	0.68485269	Probable ATP-dependent RNA helicase DDX58 [Source:UniProtKB/Swiss-Prot;Acc:Q6Q899]
ENSMUSG00000040483	Xaf1	0.937119686	0.000851172	0.075800804	up	no	0.919055188	0.432226592	190	220	175	142	96	92	0.876416662	1.040276645	0.840472258	0.528776414	0.383774267	0.384129094	XIAP associated factor 1 [Source:MGI Symbol;Acc:MGI:3772572]
ENSMUSG00000051136	Ghsr	0.933323745	0.008046239	0.365263409	up	no	0.458613	0.192518	58	106	109	66	24	47	0.284686	0.531752	0.559401	0.262468	0.103309	0.211777	Growth hormone secretagogue receptor type 1 [Source:UniProtKB/Swiss-Prot;Acc:Q99P50]
ENSMUSG00000032394	Igdcc3	0.933018845	0.000871982	0.077232043	up	no	0.964928657	0.457768334	156	161	154	92	98	74	0.936031478	0.989224458	0.969530034	0.442378689	0.518104379	0.412821935	Immunoglobulin superfamily DCC subclass member 3 [Source:UniProtKB/Swiss-Prot;Acc:Q8BQC3]
ENSMUSG00000038496	Slc19a3	0.928787874	0.007055358	0.341190432	up	no	1.343571578	0.658307433	242	221	95	120	100	101	1.721550114	1.607486921	0.7016777	0.688078807	0.624366315	0.662477178	Thiamine transporter 2 [Source:UniProtKB/Swiss-Prot;Acc:Q99PL8]
ENSMUSG00000042622	Maff	0.928136062	0.005349227	0.276750312	up	no	1.071161358	0.515488496	142	147	86	67	73	72	1.189678215	1.267454764	0.756351095	0.451609641	0.541547022	0.553308824	Transcription factor MafF [Source:UniProtKB/Swiss-Prot;Acc:O54791]
ENSMUSG00000055148	Klf2	0.927155047	8.72E-05	0.012554988	up	no	10.38632767	5.414700667	1011	974	600	625	463	497	11.940206	11.798381	7.420396	5.974251	4.831434	5.438417	Krueppel-like factor 2 [Source:UniProtKB/Swiss-Prot;Acc:Q60843]
ENSMUSG00000025213	Kazald1	0.924410356	0.0086873	0.37854793	up	no	0.84948085	0.400277493	61	58	75	32	37	37	0.779745761	0.757113504	1.011583284	0.335734087	0.42365519	0.4414432	Kazal-type serine protease inhibitor domain-containing protein 1 [Source:UniProtKB/Swiss-Prot;Acc:Q8BJ66]
ENSMUSG00000086083	Gm15829	0.923438066	0.211909412	1	up	no	1.287604667	0.631616	40	55	56	41	0	46	0.998325	1.391716	1.472773	0.827822	0	1.067026	predicted gene 15829 [Source:MGI Symbol;Acc:MGI:3801893]
ENSMUSG00000029135	Fosl2	0.92328933	8.96E-09	4.06E-06	up	no	8.471549402	4.419824267	4223	3403	3401	2395	2601	1773	9.518262738	7.869616926	8.026768543	4.371762945	5.182652092	3.705057764	Fos-related antigen 2 [Source:UniProtKB/Swiss-Prot;Acc:P47930]
ENSMUSG00000036503	Rnf13	0.914949734	4.15E-09	2.23E-06	up	no	8.604542025	4.516561356	3375	4138	4047	2617	2651	1905	7.345439927	9.243609647	9.224576502	4.61025417	5.098529239	3.840900658	ring finger protein 13 [Source:MGI Symbol;Acc:MGI:1346341]
ENSMUSG00000017309	Cd300lg	0.911993995	0.060834673	0.9036554	up	no	0.461030462	0.198159667	54	56	62	20	62	4	0.424043598	0.450356974	0.508690814	0.128767	0.436124	0.029588	CMRF35-like molecule 9 [Source:UniProtKB/Swiss-Prot;Acc:Q1ERP8]
ENSMUSG00000002910	Arrdc2	0.909355861	0.000226816	0.027380914	up	no	3.677539607	1.911248049	400	634	564	323	347	311	2.688062101	4.378078261	3.966478459	1.748214866	2.057972672	1.927556609	Arrestin domain-containing protein 2 [Source:UniProtKB/Swiss-Prot;Acc:Q9D668]
ENSMUSG00000027881	Prpf38b	0.908997534	0.001594982	0.119235876	up	no	5.754740813	3.017971564	1823	1798	1758	1157	1677	509	5.712253722	5.784312926	5.767655791	2.933051529	4.648270486	1.472592676	Pre-mRNA-splicing factor 38B [Source:UniProtKB/Swiss-Prot;Acc:Q80SY5]
ENSMUSG00000095648	Gm2004	0.906556509	0.007153063	0.343613977	up	no	1.731082323	0.876803412	165	154	95	78	84	83	2.034128235	1.95151652	1.207602216	0.773793311	0.914036712	0.942580213	_
ENSMUSG00000037235	Mxd4	0.905866013	4.65E-07	0.000130739	up	no	11.58849613	6.138293385	3345	5099	4717	2464	3070	2641	8.602737936	13.4558711	12.70687937	5.13347481	6.981237964	6.300167381	MAX dimerization protein 4 [Source:HGNC Symbol;Acc:HGNC:13906]
ENSMUSG00000021738	Atxn7	0.904965778	0.001614426	0.120052493	up	no	1.751439028	0.888752444	697	727	465	243	555	318	1.898297465	2.028479921	1.327539698	0.532210531	1.336616923	0.797429877	Ataxin-7 [Source:UniProtKB/Swiss-Prot;Acc:Q8R4I1]
ENSMUSG00000072662	Mansc4	0.903973012	0.037715485	0.752324676	up	no	0.914026263	0.44190881	62	48	49	18	50	23	1.044774191	0.834525548	0.862779049	0.242369191	0.735687135	0.347670103	MANSC domain-containing protein 4 [Source:UniProtKB/Swiss-Prot;Acc:Q3UU94]
ENSMUSG00000035829	Ppp1r26	0.902281291	0.016458264	0.536440655	up	no	3.193170117	1.661977803	970	713	735	899	443	184	3.758932498	2.834321799	2.986256054	2.817938939	1.513032379	0.65496209	Protein phosphatase 1 regulatory subunit 26 [Source:UniProtKB/Swiss-Prot;Acc:Q6A025]
ENSMUSG00000026826	Nr4a2	0.900381755	3.51E-07	0.000103946	up	no	14.99464449	7.986879525	2483	2539	3138	1928	1901	1316	13.33772619	13.99170952	17.65449777	8.392386769	9.021729105	6.546522702	Nuclear receptor subfamily 4 group A member 2 [Source:UniProtKB/Swiss-Prot;Acc:Q06219]
ENSMUSG00000104713	Gbp6	0.899096188	0.003578429	0.209775744	up	no	0.359473579	0.146380097	77	96	116	33	74	32	0.279345554	0.359402954	0.439672228	0.095586901	0.23806986	0.105483529	_
ENSMUSG00000000686	Abhd15	0.888380475	0.017746469	0.550884201	up	no	0.813676066	0.393586279	119	145	71	39	88	62	0.852659016	1.057738127	0.530631054	0.222824924	0.550107279	0.407826632	abhydrolase domain containing 15 [Source:MGI Symbol;Acc:MGI:1914727]
ENSMUSG00000046667	Rbm12b1	0.881538618	0.011547695	0.447013756	up	no	3.09678841	1.635179171	408	385	506	124	400	272	2.840129433	2.751290405	3.698945392	0.69059413	2.463213696	1.751729687	RNA-binding protein 12B-A [Source:UniProtKB/Swiss-Prot;Acc:Q80YR9]
ENSMUSG00000082674	Gm11914	0.880074064	0.024902676	0.643167833	up	no	3.215940667	1.701681667	69	80	71	37	45	54	2.965926	3.495061	3.186835	1.279373	1.684783	2.140889	predicted gene 11914 [Source:MGI Symbol;Acc:MGI:3649889]
ENSMUSG00000078853	Igtp	0.878372472	0.004450966	0.245831614	up	no	2.920752773	1.543231386	246	265	283	109	215	164	2.64772	2.917944318	3.196594	0.947404	2.045425157	1.636865	_
ENSMUSG00000105569	Gm44450	0.877993739	0.009622964	0.398454939	up	no	37.735278	20.487067	210	206	164	180	104	91	40.03587	40.46529	32.704674	27.778708	17.587885	16.094608	predicted gene, 44450 [Source:MGI Symbol;Acc:MGI:5690842]
ENSMUSG00000105843	Gm19439	0.87779567	0.005746818	0.290856832	up	no	2.315983333	1.214774	155	284	266	161	165	113	1.486149	2.794113	2.667688	1.245743	1.394232	1.004347	predicted gene, 19439 [Source:MGI Symbol;Acc:MGI:5011624]
ENSMUSG00000025488	Cox8b	0.876012909	0.289209073	1	up	no	3.030116	1.60551	24	64	59	28	65	0	1.438147	3.963318	3.688883	1.373205	3.443325	0	Cytochrome c oxidase subunit 8B, mitochondrial [Source:UniProtKB/Swiss-Prot;Acc:P48772]
ENSMUSG00000044916	1700029I15Rik	0.875767066	0.058705386	0.893297547	up	no	1.110397649	0.55962319	75	78	52	22	30	68	1.195348316	1.28348973	0.852354901	0.272444202	0.407435681	0.998989687	RIKEN cDNA 1700029I15 gene [Source:MGI Symbol;Acc:MGI:1916742]
ENSMUSG00000005268	Prlr	0.871446384	0.105168995	1	up	no	2.428285112	1.281957051	1770	1880	1367	966	2051	119	2.515181566	2.737327549	2.032346221	1.110988155	2.578164946	0.156718052	prolactin receptor [Source:MGI Symbol;Acc:MGI:97763]
ENSMUSG00000021118	Plek2	0.871303114	0.163285427	1	up	no	0.630594667	0.299381667	50	40	46	33	44	0	0.680995	0.556141	0.654648	0.368135	0.53001	0	Pleckstrin-2 [Source:UniProtKB/Swiss-Prot;Acc:Q9WV52]
ENSMUSG00000109517	Gm44763	0.86966918	0.033477501	0.720009845	up	no	0.582866	0.273713667	60	40	59	50	23	18	0.646337	0.434245	0.668016	0.436341	0.211792	0.173008	predicted gene 44763 [Source:MGI Symbol;Acc:MGI:5753339]
ENSMUSG00000023067	Cdkn1a	0.867797227	0.000570373	0.055996241	up	no	6.01462321	3.250708944	562	705	530	387	490	269	5.509045828	7.094147157	5.440676646	3.070073071	4.241781685	2.440272076	Cyclin-dependent kinase inhibitor 1 [Source:UniProtKB/Swiss-Prot;Acc:P39689]
ENSMUSG00000064365	mt-Ts2	0.867289135	0.475153533	1	up	no	23.99945933	13.11074333	113	79	2	2	118	2	41.633976	29.794985	0.569417	0.416995	38.524685	0.39055	mitochondrially encoded tRNA serine 2 [Source:MGI Symbol;Acc:MGI:102474]
ENSMUSG00000025492	Ifitm3	0.867054086	0.000107628	0.01473965	up	no	29.08069	15.898758	890	761	993	614	677	417	28.650908	25.130995	33.460167	16.008993	19.251945	12.435336	Interferon-induced transmembrane protein 3 [Source:UniProtKB/Swiss-Prot;Acc:Q9CQW9]
ENSMUSG00000061232	H2-K1	0.86674877	2.06E-06	0.000479671	up	no	16.71214347	9.119464768	2042	2051	1772	1563	1252	977	17.06099945	17.58364269	15.49178825	10.56304645	9.242410497	7.552937358	histocompatibility 2, K1, K region [Source:MGI Symbol;Acc:MGI:95904]
ENSMUSG00000074151	Nlrc5	0.866232297	0.000895581	0.078049685	up	no	0.212790075	0.071589638	58	66	120	44	29	28	0.147052733	0.170989931	0.32032756	0.087296785	0.061361537	0.066110593	Protein NLRC5 [Source:UniProtKB/Swiss-Prot;Acc:C3VPR6]
ENSMUSG00000033383	Rtp1	0.863887617	0.015359707	0.520546732	up	no	0.350300667	0.147426667	72	36	40	16	36	20	0.502671	0.255548	0.292683	0.090519	0.222155	0.129606	receptor transporter protein 1 [Source:MGI Symbol;Acc:MGI:2685450]
ENSMUSG00000073686	Gm10564	0.861515991	0.012209249	0.459337613	up	no	0.486937333	0.223035	97	68	41	40	41	30	0.678528	0.488551	0.293733	0.225974	0.248111	0.19502	_
ENSMUSG00000105504	Gbp5	0.857786197	0.000664236	0.062212964	up	no	0.697777742	0.340212672	225	179	221	132	121	107	0.737132066	0.599785274	0.756415885	0.346882298	0.351489015	0.322266703	Guanylate-binding protein 5 [Source:UniProtKB/Swiss-Prot;Acc:Q8CFB4]
ENSMUSG00000030450	Oca2	0.857547537	0.064603866	0.921127915	up	no	1.028394535	0.522749579	187	160	202	157	158	20	1.021817892	0.90266201	1.160703702	0.700326586	0.766243029	0.101679123	P protein [Source:UniProtKB/Swiss-Prot;Acc:Q62052]
ENSMUSG00000025324	Atp10a	0.856882484	0.000159674	0.020329734	up	no	2.967083388	1.593472909	873	753	608	383	562	451	3.406058882	3.013212695	2.481978587	1.211375888	1.938175532	1.630867305	Probable phospholipid-transporting ATPase VA [Source:UniProtKB/Swiss-Prot;Acc:O54827]
ENSMUSG00000054072	Iigp1	0.85610434	0.010657879	0.425714346	up	no	1.000942553	0.508207222	112	133	175	60	109	80	0.78085281	0.952495646	1.269479203	0.334316	0.671528665	0.518777	Interferon-inducible GTPase 1 [Source:UniProtKB/Swiss-Prot;Acc:Q9QZ85]
ENSMUSG00000032712	2810474O19Rik	0.852245881	0.025253982	0.644504759	up	no	0.785925249	0.390733274	424	190	407	373	156	90	0.955282923	0.437457679	0.965035146	0.683013362	0.305720042	0.183466416	RIKEN cDNA 2810474O19 gene [Source:MGI Symbol;Acc:MGI:1914496]
ENSMUSG00000034936	Arl4d	0.852101578	0.000124131	0.01644684	up	no	10.80792067	5.942739	597	729	677	384	459	446	9.418923	11.810298	11.194541	4.901996	6.398232	6.527989	ADP-ribosylation factor-like protein 4D [Source:UniProtKB/Swiss-Prot;Acc:Q99PE9]
ENSMUSG00000085837	Kcnmb4os2	0.845189203	0.004775295	0.259409922	up	no	6.081797334	3.341022092	630	654	380	530	254	300	6.754851497	7.2234637	4.267076806	4.61908832	2.411412143	2.992565811	_
ENSMUSG00000028967	Errfi1	0.844581705	4.96E-09	2.53E-06	up	no	19.99470786	11.09018508	3336	3285	2999	2293	2043	1940	20.3231441	20.5315626	19.12941688	11.31212826	11.00134344	10.95708355	Mus musculus ERBB receptor feedback inhibitor 1 (Errfi1), transcript variant 1, mRNA. [Source:RefSeq mRNA;Acc:NM_001356323]
ENSMUSG00000044583	Tlr7	0.844408895	0.009576561	0.398135761	up	no	1.006127262	0.516045359	131	275	148	106	138	90	0.695038288	1.501029946	0.822313551	0.457684131	0.646470803	0.443981143	toll-like receptor 7 [Source:MGI Symbol;Acc:MGI:2176882]
ENSMUSG00000100252	Mir124-2hg	0.84326162	0.029242754	0.689833456	up	no	1.430743926	0.753209147	454	342	365	478	139	131	1.64296354	1.267622877	1.38164536	1.401441049	0.433153127	0.425033265	Mir124-2 host gene (non-protein coding) [Source:MGI Symbol;Acc:MGI:1917691]
ENSMUSG00000103280	Gm37277	0.842809873	0.060549318	0.90275484	up	no	0.791745667	0.397198667	43	42	34	39	16	18	0.840854	0.836451	0.697932	0.614079	0.267243	0.310274	predicted gene, 37277 [Source:MGI Symbol;Acc:MGI:5610505]
ENSMUSG00000022906	Parp9	0.842790748	0.001187869	0.097279915	up	no	1.16760027	0.606768244	220	270	276	147	176	145	0.977584835	1.231574458	1.293641517	0.529161878	0.691293441	0.599849413	Poly [ADP-ribose] polymerase 9 [Source:UniProtKB/Swiss-Prot;Acc:Q8CAS9]
ENSMUSG00000046223	Plaur	0.841788672	0.093653318	1	up	no	0.396833066	0.177208697	8	48	87	26	37	13	0.066723224	0.390310564	0.73346541	0.175658915	0.26622723	0.089739947	plasminogen activator, urokinase receptor [Source:MGI Symbol;Acc:MGI:97612]
ENSMUSG00000106237	Gm8066	0.840430545	0.066993238	0.931750237	up	no	2.466114	1.333115333	83	34	46	44	34	27	3.732916	1.533108	2.132318	1.57146	1.321965	1.105921	predicted gene 8066 [Source:MGI Symbol;Acc:MGI:3646351]
ENSMUSG00000033083	Tbc1d4	0.837410381	0.000668971	0.062298417	up	no	1.507506256	0.799636419	546	582	435	237	404	322	1.544678078	1.687668043	1.290172646	0.543225058	1.012320431	0.843363769	TBC1 domain family member 4 [Source:HGNC Symbol;Acc:HGNC:19165]
ENSMUSG00000054404	Slfn5	0.837389031	0.000562311	0.055539328	up	no	2.039820481	1.097562322	545	599	590	282	488	324	1.876065166	2.11680822	2.126588058	0.782113586	1.483682482	1.026890898	Schlafen family member 5 [Source:UniProtKB/Swiss-Prot;Acc:Q8CBA2]
ENSMUSG00000043079	Synpo	0.828427961	7.00E-07	0.00019011	up	no	14.04170691	7.863796733	6452	5462	6065	4335	3111	4368	14.76732571	12.82464057	14.53315445	8.035525686	6.287474408	9.268390104	Synaptopodin [Source:UniProtKB/Swiss-Prot;Acc:Q8CC35]
ENSMUSG00000026452	Syt2	0.828176126	0.005673064	0.290329824	up	no	4.087833226	2.258758742	1338	1492	1364	1290	1099	386	3.815949251	4.369388873	4.078161555	2.98030067	2.775275252	1.020700304	synaptotagmin II [Source:MGI Symbol;Acc:MGI:99666]
ENSMUSG00000102422	Gm21949	0.827050307	0.089149174	1	up	no	7.059462333	3.935649667	192	561	1463	463	520	483	1.764419	5.298983	14.114985	3.448965	4.234755	4.123229	predicted gene, 21949 [Source:MGI Symbol;Acc:MGI:5439400]
ENSMUSG00000050447	Lypd6	0.821455583	0.002496829	0.161471546	up	no	5.151321998	2.871569406	893	816	876	447	869	376	5.21465774	4.88389087	5.355417385	2.103901576	4.481143033	2.02966361	Ly6/PLAUR domain-containing protein 6 [Source:UniProtKB/Swiss-Prot;Acc:Q8BPP5]
ENSMUSG00000041836	Ptpre	0.819697009	0.003830035	0.220558564	up	no	4.892940055	2.7288047	3097	2568	1085	1273	1683	1419	6.618711363	5.63503741	2.425071393	2.202702861	3.175112469	2.808598769	Receptor-type tyrosine-protein phosphatase epsilon [Source:UniProtKB/Swiss-Prot;Acc:P49446]
ENSMUSG00000035208	Slfn8	0.816886238	0.010441751	0.418527485	up	no	0.368423385	0.165907941	52	71	80	25	39	43	0.274727518	0.386462938	0.444079698	0.103725186	0.181967628	0.21203101	schlafen 8 [Source:MGI Symbol;Acc:MGI:2672859]
ENSMUSG00000044968	Napepld	0.814601662	0.012501017	0.465134858	up	no	8.456006464	4.764649663	1667	1475	1357	662	623	1623	9.192584767	8.344418304	7.83101632	2.955129665	3.037671869	8.301147453	N-acyl-phosphatidylethanolamine-hydrolyzing phospholipase D [Source:UniProtKB/Swiss-Prot;Acc:Q8BH82]
ENSMUSG00000014361	Mertk	0.813652174	1.15E-05	0.002250237	up	no	9.226330784	5.206120452	1702	1953	1713	1101	1465	990	8.565294898	10.08336687	9.030330581	4.486029559	6.515235498	4.6170963	Tyrosine-protein kinase Mer [Source:UniProtKB/Swiss-Prot;Acc:Q60805]
ENSMUSG00000109128	Gm45022	0.813255275	0.017189144	0.545152664	up	no	8.199295333	4.623098333	269	156	178	110	175	112	10.751361	6.408375	7.43815	3.546705	6.167712	4.154878	predicted gene 45022 [Source:MGI Symbol;Acc:MGI:5753598]
ENSMUSG00000097976	Gm26918	0.812293248	0.037306108	0.749314686	up	no	2.409070667	1.328855333	86	87	63	41	68	44	2.575494	2.675221	1.976497	0.981386	1.790811	1.214369	predicted gene, 26918 [Source:MGI Symbol;Acc:MGI:5504033]
ENSMUSG00000008384	Sertad1	0.811092165	0.002827222	0.174444653	up	no	5.284452298	2.968869797	274	389	291	254	184	195	4.431846705	6.475600406	4.945909781	3.341101567	2.633721609	2.931786214	SERTA domain-containing protein 1 [Source:UniProtKB/Swiss-Prot;Acc:Q9JL10]
ENSMUSG00000053560	Ier2	0.811028997	0.000710018	0.065199805	up	no	7.623512333	4.302210333	565	560	435	309	339	379	8.102341	8.236702	6.531494	3.578126	4.295571	5.032934	Immediate early response 2 protein [Source:UniProtKB/Swiss-Prot;Acc:P17950]
ENSMUSG00000048489	8430408G22Rik	0.809010689	0.05636857	0.887644797	up	no	0.742947635	0.381131856	52	57	29	30	16	36	0.835571496	0.915204039	0.47806737	0.390070026	0.22716066	0.526164881	Protein DEPP1 [Source:UniProtKB/Swiss-Prot;Acc:Q8K2F3]
ENSMUSG00000066687	Zbtb16	0.808363376	9.48E-07	0.00024138	up	no	14.03669254	7.97246534	3403	3106	3443	1949	2647	2018	14.05671898	13.16124253	14.89211613	6.520338376	9.666045451	7.731012194	zinc finger and BTB domain containing 16 [Source:MGI Symbol;Acc:MGI:103222]
ENSMUSG00000043794	D830025C05Rik	0.802597085	0.024490156	0.637163265	up	no	0.513245667	0.251583667	62	44	47	30	36	23	0.609217	0.447926	0.482594	0.233859	0.311061	0.209831	_
ENSMUSG00000029108	Pcdh7	0.800787743	0.000888419	0.077841715	up	no	4.348216153	2.453434677	1802	1404	2963	1473	1518	1126	3.702939423	2.959066799	6.382642238	2.453922065	2.758748681	2.147633285	protocadherin 7 [Source:MGI Symbol;Acc:MGI:1860487]
ENSMUSG00000026896	Ifih1	0.800394859	0.003103711	0.186398369	up	no	0.795757189	0.414336614	306	279	290	157	261	118	0.8150831	0.764226537	0.80796193	0.336421564	0.614142583	0.292445695	Interferon-induced helicase C domain-containing protein 1 [Source:UniProtKB/Swiss-Prot;Acc:Q8R5F7]
ENSMUSG00000108351	Gm36736	0.800125863	0.05214459	0.863528249	up	no	2.130687333	1.181081667	64	53	69	45	51	27	2.146963	1.82371	2.421389	1.214042	1.498051	0.831152	predicted gene, 36736 [Source:MGI Symbol;Acc:MGI:5595895]
ENSMUSG00000024079	Eif2ak2	0.799021123	0.004053447	0.23017082	up	no	1.901585326	1.050389166	432	477	402	231	424	193	1.832948724	2.079809507	1.791997746	0.796031757	1.594932827	0.760202914	Interferon-induced, double-stranded RNA-activated protein kinase [Source:UniProtKB/Swiss-Prot;Acc:Q03963]
ENSMUSG00000003847	Nfat5	0.798122773	0.010740128	0.426906984	up	no	3.756100666	2.11763194	3295	3028	2966	1155	3657	1285	3.907021642	3.681029727	3.68025063	1.106324701	3.834697307	1.41187381	nuclear factor of activated T cells 5 [Source:MGI Symbol;Acc:MGI:1859333]
ENSMUSG00000082988	Gm5903	0.797742583	0.014084268	0.502256699	up	no	0.890836	0.469977	103	103	73	60	56	57	0.966702	0.988584	0.717222	0.454858	0.460124	0.494949	predicted gene 5903 [Source:MGI Symbol;Acc:MGI:3644470]
ENSMUSG00000033107	Rnf125	0.793813879	0.04577945	0.823474281	up	no	0.928406667	0.493202667	57	46	64	30	28	46	0.929323	0.768929	1.086968	0.387899	0.403211	0.688498	E3 ubiquitin-protein ligase RNF125 [Source:UniProtKB/Swiss-Prot;Acc:Q9D9R0]
ENSMUSG00000035840	Lysmd3	0.793117743	0.029785287	0.694377057	up	no	1.849575101	1.025091229	283	418	353	292	98	301	1.448342303	2.202111	1.898272	1.212165	0.4347954	1.428313286	LysM and putative peptidoglycan-binding domain-containing protein 3 [Source:UniProtKB/Swiss-Prot;Acc:Q99LE3]
ENSMUSG00000052557	Gan	0.792227892	0.092635086	1	up	no	2.291317076	1.280870037	1400	1552	1193	159	1241	1237	2.267757065	2.581289127	2.024905036	0.207499154	1.777027366	1.858083592	Gigaxonin [Source:UniProtKB/Swiss-Prot;Acc:Q8CA72]
ENSMUSG00000042523	Dnal1	0.79013857	0.233429212	1	up	no	10.71586845	6.154692827	680	4749	4465	5339	927	789	2.127223535	15.32168481	14.69869699	13.59712676	2.573808709	2.293143017	Mus musculus dynein, axonemal, light chain 1 (Dnal1), transcript variant 2, mRNA. [Source:RefSeq mRNA;Acc:NM_001346528]
ENSMUSG00000026104	Stat1	0.789542722	1.93E-06	0.000456103	up	no	4.896215421	2.790447685	1568	1622	1485	1129	1048	964	4.80945427	5.106904764	4.77228723	2.802978219	2.835044675	2.733320161	signal transducer and activator of transcription 1 [Source:MGI Symbol;Acc:MGI:103063]
ENSMUSG00000017405	Nek8	0.789120643	0.013357436	0.482674374	up	no	0.575812021	0.291090196	104	151	155	106	94	50	0.429710151	0.639761329	0.657964582	0.34807796	0.339629817	0.18556281	Serine/threonine-protein kinase Nek8 [Source:UniProtKB/Swiss-Prot;Acc:Q91ZR4]
ENSMUSG00000020482	Ccdc117	0.786860293	6.70E-05	0.009926967	up	no	6.117066667	3.503437333	830	896	1038	627	693	544	5.371874	5.947316	7.03201	3.283034	3.964296	3.262982	Coiled-coil domain-containing protein 117 [Source:UniProtKB/Swiss-Prot;Acc:Q6PB51]
ENSMUSG00000036779	Papd5	0.778134596	0.003765344	0.217602139	up	no	5.136644268	2.953593472	865	820	1702	728	873	697	3.816984316	3.714155831	7.878792659	2.601545019	3.405252751	2.853982647	poly(A) RNA polymerase D5, non-canonical [Source:HGNC Symbol;Acc:HGNC:30758]
ENSMUSG00000018411	Mapt	0.776393171	0.001775188	0.125239141	up	no	25.23164627	14.68923746	6579	5832	12955	6303	5451	5703	19.05541333	17.33246896	39.30705653	14.79016499	13.95808586	15.31946153	Microtubule-associated protein tau [Source:UniProtKB/Swiss-Prot;Acc:P10637]
ENSMUSG00000037669	Ldah	0.776335829	0.046650551	0.832709775	up	no	4.23443126	2.430648043	1447	1250	1462	493	535	1702	4.315612792	3.823629989	4.564051	1.179902048	1.403972806	4.708069275	lipid droplet associated hydrolase [Source:HGNC Symbol;Acc:HGNC:26145]
ENSMUSG00000064215	Ifi27	0.774795493	0.00165724	0.121657851	up	no	28.86396062	16.82860862	2067	1747	1884	1479	1744	716	30.6874144	26.61798547	29.286482	17.77920279	22.8763315	9.830291562	_
ENSMUSG00000027580	Helz2	0.772616705	0.00050488	0.052743734	up	no	0.724626175	0.382698904	443	391	294	267	240	195	0.836709224	0.756584619	0.580584683	0.40838112	0.399850706	0.339864885	Helicase with zinc finger domain 2 [Source:UniProtKB/Swiss-Prot;Acc:E9QAM5]
ENSMUSG00000030589	Rasgrp4	0.772051246	0.008817026	0.382149385	up	no	0.391593015	0.187869146	75	128	131	62	54	73	0.257019976	0.447514401	0.470244667	0.171538376	0.16330293	0.228766134	RAS guanyl releasing protein 4 [Source:MGI Symbol;Acc:MGI:2386851]
ENSMUSG00000032807	Alox12b	0.771729382	0.006631528	0.327314772	up	no	2.856946333	1.631927667	212	360	357	198	223	204	1.899921	3.314335	3.356583	1.437346	1.762842	1.695595	Arachidonate 12-lipoxygenase, 12R-type [Source:UniProtKB/Swiss-Prot;Acc:O70582]
ENSMUSG00000045534	Kcna5	0.770861671	0.00937548	0.395834729	up	no	1.173673333	0.646458333	175	159	120	103	89	101	1.33066	1.239336	0.951024	0.632603	0.596645	0.710127	Potassium voltage-gated channel subfamily A member 5 [Source:UniProtKB/Swiss-Prot;Acc:Q61762]
ENSMUSG00000003541	Ier3	0.769112968	0.026203834	0.658002904	up	no	3.155729667	1.810391	209	151	122	153	89	86	4.033175	2.971389	2.462625	2.389117	1.510722	1.531334	immediate early response 3 [Source:HGNC Symbol;Acc:HGNC:5392]
ENSMUSG00000045349	Sh2d5	0.767816595	0.012900381	0.472443828	up	no	13.40683869	7.832642586	2099	2379	2252	1087	2665	859	12.23478346	14.23363881	13.7520938	5.125010621	13.73564438	4.637272754	SH2 domain-containing protein 5 [Source:UniProtKB/Swiss-Prot;Acc:Q8JZW5]
ENSMUSG00000043913	Ccdc60	0.76765298	0.086173779	0.984930054	up	no	0.313905583	0.143116655	79	96	26	27	73	9	0.365652947	0.452593101	0.123470701	0.097143661	0.297767389	0.034438914	Coiled-coil domain-containing protein 60 [Source:UniProtKB/Swiss-Prot;Acc:Q8C4J0]
ENSMUSG00000037902	Sirpa	0.764327843	0.000557275	0.055377548	up	no	41.16354687	24.19298871	8906	6250	11918	5821	5492	7303	39.55410349	28.49054527	55.44599183	20.93227584	21.55819564	30.08849465	signal-regulatory protein alpha [Source:MGI Symbol;Acc:MGI:108563]
ENSMUSG00000096972	Gm26883	0.763468792	8.86E-05	0.012554988	up	no	12.44639133	7.290806333	3060	2722	2768	1423	2346	2049	13.054286	11.916095	12.368793	4.91879	8.847047	8.106582	predicted gene, 26883 [Source:MGI Symbol;Acc:MGI:5477377]
ENSMUSG00000002289	Angptl4	0.762213114	0.009120838	0.390137256	up	no	1.021351895	0.561139205	181	130	143	110	106	79	1.197733895	0.884220712	0.982101079	0.584805876	0.61212743	0.486484308	Angiopoietin-related protein 4 [Source:UniProtKB/Swiss-Prot;Acc:Q9Z1P8]
ENSMUSG00000038007	Acer2	0.761281475	0.002150279	0.146012888	up	no	1.252130108	0.697718978	496	388	326	209	276	297	1.508011097	1.21192656	1.036452669	0.514786224	0.741021905	0.837348807	alkaline ceramidase 2 [Source:MGI Symbol;Acc:MGI:1920932]
ENSMUSG00000028645	Slc2a1	0.761096421	1.94E-08	8.12E-06	up	no	50.91274112	29.99995235	7829	8480	7645	5636	5815	5124	48.72803396	54.16619559	49.8439938	28.4157386	32.00211346	29.58200499	solute carrier family 2 (facilitated glucose transporter), member 1 [Source:MGI Symbol;Acc:MGI:95755]
ENSMUSG00000030413	Pglyrp1	0.760339587	0.006597022	0.327314772	up	no	3.030426653	1.748070396	259	268	225	210	143	159	3.049910081	3.254156813	2.787213066	2.007746314	1.494533358	1.741931517	Peptidoglycan recognition protein 1 [Source:UniProtKB/Swiss-Prot;Acc:O88593]
ENSMUSG00000044456	Rin3	0.756525911	0.00649399	0.32364697	up	no	0.734366771	0.393878372	291	230	156	121	160	143	0.928468915	0.753512242	0.521119155	0.310972793	0.450013141	0.420649182	Ras and Rab interactor 3 [Source:MGI Symbol;Acc:MGI:2385708]
ENSMUSG00000020806	Rhbdf2	0.751436732	0.025551611	0.647612134	up	no	0.507429764	0.26082039	107	121	133	93	97	35	0.438689241	0.509928455	0.573671596	0.308049487	0.345632202	0.128779483	Inactive rhomboid protein 2 [Source:UniProtKB/Swiss-Prot;Acc:Q80WQ6]
ENSMUSG00000090698	Apold1	0.748374998	0.018935289	0.569351296	up	no	1.146888667	0.64224	256	185	112	123	126	114	1.564207	1.160062	0.716397	0.60598	0.678014	0.642726	apolipoprotein L domain containing 1 [Source:MGI Symbol;Acc:MGI:2685921]
ENSMUSG00000103473	Gm37696	0.74798534	0.015417698	0.520546732	up	no	0.508473333	0.262306	85	70	75	56	40	44	0.552591	0.465715	0.507114	0.294662	0.229167	0.263089	predicted gene, 37696 [Source:MGI Symbol;Acc:MGI:5610924]
ENSMUSG00000055320	Tead1	0.747036853	0.100875007	1	up	no	1.960565306	1.127738523	509	1725	1322	1644	462	400	0.813437555	2.844359595	2.22389877	2.139914422	0.651636058	0.591665088	TEA domain family member 1 [Source:MGI Symbol;Acc:MGI:101876]
ENSMUSG00000020227	Irak3	0.746605308	0.019065831	0.571168833	up	no	0.264601974	0.117304351	42	34	55	28	28	14	0.246013514	0.205766837	0.342025569	0.131049606	0.145300355	0.075563093	Mus musculus interleukin-1 receptor-associated kinase 3 (Irak3), transcript variant 2, mRNA. [Source:RefSeq mRNA;Acc:NM_001359184]
ENSMUSG00000073411	H2-D1	0.744194721	8.03E-07	0.000214658	up	no	25.68718512	15.29497558	3152	3053	2698	2274	2188	1780	26.66475714	26.50319075	23.89360748	15.57767227	16.35496425	13.95229022	H-2 class I histocompatibility antigen, D-B alpha chain [Source:UniProtKB/Swiss-Prot;Acc:P01899]
ENSMUSG00000030888	Rrp8	0.741700554	0.001359687	0.106532766	up	no	2.926327948	1.709847049	423	478	501	330	378	259	2.576276877	2.992287784	3.210419184	1.63210756	2.033250427	1.464183161	Ribosomal RNA-processing protein 8 [Source:UniProtKB/Swiss-Prot;Acc:Q9DB85]
ENSMUSG00000030711	Sult1a1	0.741261346	0.009748961	0.401209131	up	no	5.403291496	3.192157598	397	289	412	196	343	219	5.721125132	4.249434141	6.239315214	2.276236329	4.376952109	2.923284356	sulfotransferase family 1A, phenol-preferring, member 1 [Source:MGI Symbol;Acc:MGI:102896]
ENSMUSG00000001348	Acp5	0.738819224	0.134885533	1	up	no	0.391845175	0.194728184	8	47	52	13	36	14	0.086017378	0.518063066	0.57145508	0.108274092	0.340806992	0.135103467	Tartrate-resistant acid phosphatase type 5 [Source:UniProtKB/Swiss-Prot;Acc:Q05117]
ENSMUSG00000044726	Erich5	0.738043786	0.046904767	0.833208589	up	no	0.449705667	0.229577	50	36	59	25	42	21	0.454617	0.334899	0.559601	0.17884	0.339231	0.17066	Glutamate-rich protein 5 [Source:UniProtKB/Swiss-Prot;Acc:Q8K0S2]
ENSMUSG00000040055	Gjb6	0.737862322	1.06E-05	0.002109338	up	no	19.2303456	11.49100057	2059	2467	2370	1544	1662	1628	16.79389072	20.64965586	20.24749023	10.19451375	11.97126109	12.30722687	gap junction protein, beta 6 [Source:MGI Symbol;Acc:MGI:107588]
ENSMUSG00000036819	Jmjd4	0.736102606	0.001185279	0.097279915	up	no	3.220444775	1.893458951	866	866	1337	621	834	665	2.649290279	2.721019608	4.291024436	1.540317934	2.254077311	1.885981608	JmjC domain-containing protein 4 [Source:UniProtKB/Swiss-Prot;Acc:Q8BFT6]
ENSMUSG00000065968	Ifitm7	0.735182029	0.406432634	1	up	no	6.990062394	4.159299841	800	734	701	755	5	803	7.334921956	6.909481542	6.725783684	5.611032654	0.039780623	6.827086246	interferon induced transmembrane protein 7 [Source:RefSeq peptide;Acc:NP_001257647]
ENSMUSG00000046879	Irgm1	0.734765512	0.000523922	0.05389459	up	no	2.099068882	1.221454987	539	512	588	373	373	375	2.020141955	1.967432126	2.309632564	1.129351181	1.234523935	1.300489845	Mus musculus immunity-related GTPase family M member 1 (Irgm1), transcript variant 2, mRNA. [Source:RefSeq mRNA;Acc:NM_001355757]
ENSMUSG00000113029	Gm40578	0.730938739	0.064707303	0.921796258	up	no	2.649085946	1.556356561	123	136	123	73	59	129	2.507908052	2.829834064	2.609515721	1.199122519	1.037171526	2.432775637	predicted gene, 40578 [Source:MGI Symbol;Acc:MGI:5623463]
ENSMUSG00000060647	Gm7099	0.729057771	0.132493737	1	up	no	2.617871667	1.539686	36	63	96	46	67	24	1.379478	2.540944	3.933193	1.455737	2.316955	0.846366	predicted gene 7099 [Source:MGI Symbol;Acc:MGI:3646387]
ENSMUSG00000092609	Gm20481	0.727969927	0.01427244	0.503346393	up	no	8.018332	4.801466333	205	198	205	128	143	155	7.906191	7.843059	8.305746	3.987693	4.888184	5.528522	_
ENSMUSG00000091971	Hspa1a	0.726961075	0.00013797	0.018132978	up	no	11.059453	6.642265	1215	1682	1500	1065	984	1054	8.937488	12.690032	11.550839	6.344492	6.397011	7.185292	Heat shock 70 kDa protein 1A [Source:UniProtKB/Swiss-Prot;Acc:Q61696]
ENSMUSG00000090877	Hspa1b	0.72687179	0.000102059	0.01409541	up	no	13.04374467	7.841616333	1363	1800	1735	1175	1081	1203	10.606003	14.382199	14.143032	7.406173	7.435516	8.68316	Heat shock 70 kDa protein 1B [Source:UniProtKB/Swiss-Prot;Acc:P17879]
ENSMUSG00000045314	Sowahb	0.72615786	0.011210591	0.439180305	up	no	0.969075	0.546268333	176	207	127	128	101	108	0.980007	1.187579	0.739639	0.579324	0.499528	0.559953	Ankyrin repeat domain-containing protein SOWAHB [Source:UniProtKB/Swiss-Prot;Acc:Q8BZW2]
ENSMUSG00000031431	Tsc22d3	0.725417675	1.82E-07	5.81E-05	up	no	21.50537589	12.96740486	3929	4056	4534	3092	3013	2778	19.74201783	20.91401358	23.86009625	12.58470821	13.37993813	12.93756824	TSC22 domain family protein 3 [Source:UniProtKB/Swiss-Prot;Acc:Q9Z2S7]
ENSMUSG00000022237	Ankrd33b	0.725301679	3.15E-05	0.005188063	up	no	7.625531928	4.572946732	3639	2685	2667	2035	1933	2323	9.062290216	6.859627254	6.954678314	4.101581386	4.252480756	5.364778056	Ankyrin repeat domain-containing protein 33B [Source:UniProtKB/Swiss-Prot;Acc:Q3U0L2]
ENSMUSG00000092283	Gm20412	0.724912177	0.016148473	0.530588029	up	no	5.687828	3.401832	170	153	162	118	107	116	5.830627	5.393377	5.83948	3.277667	3.245677	3.682152	predicted gene 20412 [Source:MGI Symbol;Acc:MGI:5141877]
ENSMUSG00000073421	H2-Ab1	0.722340979	0.075287482	0.955612706	up	no	1.409345653	0.814834231	136	100	80	84	100	32	1.790059885	1.350801772	1.087175302	0.904955106	1.169018261	0.370529324	histocompatibility 2, class II antigen A, beta 1 [Source:MGI Symbol;Acc:MGI:103070]
ENSMUSG00000013584	Aldh1a2	0.721369385	0.036787846	0.749314686	up	no	2.321857667	1.368908667	299	234	177	213	201	84	2.873098	2.312702	1.779773	1.656451	1.706389	0.743886	Retinal dehydrogenase 2 [Source:UniProtKB/Swiss-Prot;Acc:Q62148]
ENSMUSG00000034282	Evpl	0.720664365	0.018218914	0.559159411	up	no	0.517733333	0.274851667	177	110	159	60	134	80	0.603544	0.383131	0.566525	0.166025	0.404854	0.253676	Envoplakin [Source:UniProtKB/Swiss-Prot;Acc:Q9D952]
ENSMUSG00000024521	Pmaip1	0.719343774	0.082012453	0.968371979	up	no	0.460283333	0.240301333	77	58	30	14	40	44	0.631873	0.489796	0.259181	0.093549	0.291511	0.335844	phorbol-12-myristate-13-acetate-induced protein 1 [Source:MGI Symbol;Acc:MGI:1930146]
ENSMUSG00000021903	Galnt15	0.717759434	0.006836898	0.332599769	up	no	0.886707	0.499958333	227	252	273	132	171	192	0.782059	0.892123	0.985939	0.36867	0.519685	0.61152	Polypeptide N-acetylgalactosaminyltransferase 15 [Source:UniProtKB/Swiss-Prot;Acc:Q9D2N8]
ENSMUSG00000071103	1700029J07Rik	0.717051544	0.073391874	0.950768974	up	no	0.667415633	0.3668492	61	106	80	40	92	28	0.483594	0.859670015	0.658982883	0.254784599	0.641928	0.203835	RIKEN cDNA 1700029J07 gene [Source:MGI Symbol;Acc:MGI:1916729]
ENSMUSG00000046410	Kcnk6	0.717039612	0.008032565	0.365263409	up	no	1.288795026	0.744865782	248	232	240	206	169	119	1.298989448	1.248495821	1.318899809	0.873743809	0.784745864	0.576107674	potassium inwardly-rectifying channel, subfamily K, member 6 [Source:MGI Symbol;Acc:MGI:1891291]
ENSMUSG00000060802	B2m	0.715891775	2.39E-07	7.21E-05	up	no	139.3387653	84.79431933	5818	5288	4992	4138	4087	3298	147.653732	137.693222	132.669342	85.06472	91.686806	77.631432	Beta-2-microglobulin [Source:UniProtKB/Swiss-Prot;Acc:P01887]
ENSMUSG00000085595	Gm16090	0.715710477	0.304141081	1	up	no	0.658523667	0.361869	52	42	57	30	69	0	0.662448	0.550051	0.763072	0.309975	0.775632	0	predicted gene 16090 [Source:MGI Symbol;Acc:MGI:3801885]
ENSMUSG00000000275	Trim25	0.714988054	0.000769881	0.069704169	up	no	2.082536483	1.229623435	545	546	521	392	422	307	2.061146561	2.120215161	2.066247726	1.200021407	1.414037027	1.074811872	E3 ubiquitin/ISG15 ligase TRIM25 [Source:UniProtKB/Swiss-Prot;Acc:Q61510]
ENSMUSG00000057143	Trim12c	0.712201744	0.042994986	0.799873623	up	no	0.697853291	0.386999991	109	83	159	49	94	83	0.631326	0.492275873	0.969958	0.229299972	0.484786	0.446914	tripartite motif-containing 12C [Source:MGI Symbol;Acc:MGI:4821183]
ENSMUSG00000022679	Mpv17l	0.712116137	0.005248642	0.275038972	up	no	12.92556074	7.851116387	1256	2569	2671	1469	1518	1653	7.267290077	15.2875525	16.22183963	6.8902521	7.774164866	8.888932195	Mpv17-like protein [Source:UniProtKB/Swiss-Prot;Acc:Q99MS3]
ENSMUSG00000045391	1700120B22Rik	0.710209787	0.102252672	1	up	no	2.208261667	1.310881667	50	52	37	39	34	25	2.333281	2.480203	1.811301	1.473321	1.394965	1.064359	RIKEN cDNA 1700120B22 gene [Source:MGI Symbol;Acc:MGI:3604190]
ENSMUSG00000018654	Ikzf1	0.708513084	0.014146328	0.502421317	up	no	0.765285793	0.429512093	202	213	181	112	107	171	0.757383476	0.8244159	0.714058004	0.341086888	0.351215772	0.596233619	IKAROS family zinc finger 1 [Source:MGI Symbol;Acc:MGI:1342540]
ENSMUSG00000089945	Pakap	0.705456259	0.029333117	0.689833456	up	no	2.345789395	1.399876715	1440	779	467	563	508	781	3.716575414	2.062645976	1.258146794	1.17380638	1.157169456	1.86865431	paralemmin A kinase anchor protein [Source:RefSeq peptide;Acc:NP_001291473]
ENSMUSG00000019890	Nts	0.702853641	0.012899727	0.472443828	up	no	5.454600333	3.312501	260	263	388	193	246	211	4.543297	4.715428	7.105076	2.72295	3.798659	3.415894	Neurotensin/neuromedin N Large neuromedin N Neuromedin N Neurotensin Tail peptide [Source:UniProtKB/Swiss-Prot;Acc:Q9D3P9]
ENSMUSG00000006205	Htra1	0.702198843	1.94E-07	6.07E-05	up	no	54.5045541	33.46185449	7092	7220	6754	5524	4898	4787	53.75176761	56.15525026	53.60664443	33.9176561	32.81616629	33.6517411	Serine protease HTRA1 [Source:UniProtKB/Swiss-Prot;Acc:Q9R118]
ENSMUSG00000060477	Irak2	0.701515885	0.006772105	0.331426409	up	no	3.184032249	1.919435978	659	754	482	361	413	553	3.252554633	3.813392741	2.486149375	1.438944783	1.794769343	2.524593808	Interleukin-1 receptor-associated kinase-like 2 [Source:UniProtKB/Swiss-Prot;Acc:Q8CFA1]
ENSMUSG00000026842	Abl1	0.699648303	0.014979986	0.519423044	up	no	5.474260995	3.332196733	2653	3060	2808	1214	1644	3111	4.988605079	5.905271679	5.528906227	1.843769048	2.728272846	5.424548306	c-abl oncogene 1, non-receptor tyrosine kinase [Source:MGI Symbol;Acc:MGI:87859]
ENSMUSG00000037003	Tns2	0.699007089	0.000460126	0.049660107	up	no	4.294499963	2.606994442	1192	1108	857	734	887	632	4.759136802	4.540845016	3.58351807	2.367292637	3.123694716	2.329995972	Mus musculus tensin 2 (Tns2), transcript variant 2, mRNA. [Source:RefSeq mRNA;Acc:NM_001355636]
ENSMUSG00000078887	Gm6710	0.698910016	0.036101351	0.747356616	up	no	1.915587875	1.141677633	277	305	304	343	185	108	1.750628615	1.98091806	2.015216952	1.758384182	1.035979308	0.63066941	_
ENSMUSG00000025736	Jmjd8	0.697226675	0.027548638	0.669227522	up	no	9.418685105	5.770712555	2023	718	783	825	845	842	15.98716196	5.809713601	6.459179748	5.264754624	5.895748487	6.151634555	JmjC domain-containing protein 8 [Source:UniProtKB/Swiss-Prot;Acc:Q3TA59]
ENSMUSG00000026072	Il1r1	0.697056821	0.00053566	0.054560295	up	no	2.716767416	1.637464647	767	835	722	513	532	591	2.629391235	2.930468136	2.590442876	1.421102096	1.612526865	1.878764979	Interleukin-1 receptor type 1 Interleukin-1 receptor type 1, membrane form Interleukin-1 receptor type 1, soluble form [Source:UniProtKB/Swiss-Prot;Acc:P13504]
ENSMUSG00000024013	Fgd2	0.696838839	0.019279158	0.574392014	up	no	1.387339356	0.817573109	332	234	214	128	227	179	1.741911187	1.254342811	1.165764071	0.535815904	1.05608227	0.860821153	FYVE, RhoGEF and PH domain-containing protein 2 [Source:UniProtKB/Swiss-Prot;Acc:Q8BY35]
ENSMUSG00000091562	Crybg3	0.696763687	0.072686151	0.948411694	up	no	0.828096333	0.472593333	90	92	138	42	116	55	0.677875	0.714809	1.091605	0.254068	0.777322	0.38639	_
ENSMUSG00000078920	Ifi47	0.696613694	0.047231791	0.836670101	up	no	0.719781177	0.405820382	102	56	82	56	44	59	0.897787044	0.506036282	0.755520206	0.399324111	0.34280342	0.475333615	_
ENSMUSG00000101316	Gm12663	0.695773453	0.03724788	0.749314686	up	no	3.915216	2.378907	206	126	173	131	149	83	4.685862	2.944717	4.115069	2.401974	2.994223	1.740524	predicted gene 12663 [Source:MGI Symbol;Acc:MGI:3652168]
ENSMUSG00000034009	Rxfp1	0.695430462	0.014417505	0.503346393	up	no	0.529870988	0.288961106	246	141	330	165	180	118	0.532378155	0.311665378	0.745569432	0.289778169	0.34236765	0.234737499	Relaxin receptor 1 [Source:UniProtKB/Swiss-Prot;Acc:Q6R6I7]
ENSMUSG00000019577	Pdk4	0.695111498	0.004477032	0.245831614	up	no	3.334169916	2.02115482	453	585	534	383	469	272	2.813556472	3.722469663	3.466483614	1.926569431	2.574530979	1.56236405	pyruvate dehydrogenase kinase, isoenzyme 4 [Source:MGI Symbol;Acc:MGI:1351481]
ENSMUSG00000083557	Gm6877	0.694329928	0.1886504	1	up	no	1.261355	0.741312333	52	97	38	28	22	76	1.026913	1.973153	0.783999	0.446863	0.38324	1.393834	predicted pseudogene 6877 [Source:MGI Symbol;Acc:MGI:3644703]
ENSMUSG00000112022	Gm2436	0.692458653	0.648806102	1	up	no	1.269489667	0.747438	47	0	85	99	0	0	1.323072	0	2.485397	2.242314	0	0	predicted gene 2436 [Source:MGI Symbol;Acc:MGI:3780603]
ENSMUSG00000024014	Pim1	0.690293098	0.030908994	0.69972847	up	no	0.937686	0.543083	126	103	105	92	82	55	1.042289	0.868358	0.902411	0.614284	0.598891	0.416074	Pim-1 proto-oncogene, serine/threonine kinase [Source:HGNC Symbol;Acc:HGNC:8986]
ENSMUSG00000009734	Pou6f2	0.68980965	0.003122461	0.186398369	up	no	0.139331942	0.0483704	34	52	46	28	14	14	0.1058267	0.162454903	0.149714223	0.066689552	0.038675511	0.039746138	POU domain, class 6, transcription factor 2 [Source:MGI Symbol;Acc:MGI:2443631]
ENSMUSG00000086810	Gm13110	0.688467307	0.15479047	1	up	no	0.364489	0.188221333	17	121	30	20	30	50	0.107184	0.791835	0.194448	0.100194	0.168358	0.296112	predicted gene 13110 [Source:MGI Symbol;Acc:MGI:3651716]
ENSMUSG00000037266	Rsrp1	0.688369906	0.000216746	0.026360573	up	no	34.8995555	21.61913571	5349	6199	4163	3192	3770	4352	34.85156092	41.44275255	28.40435302	16.84230174	21.71490043	26.30020496	Arginine/serine-rich protein 1 [Source:UniProtKB/Swiss-Prot;Acc:Q3UC65]
ENSMUSG00000028270	Gbp2	0.687575178	0.023928402	0.632906475	up	no	2.064622	1.244006333	246	222	231	172	224	101	2.129477	1.974305	2.090084	1.204859	1.717446	0.809714	Guanylate-binding protein 2 [Source:UniProtKB/Swiss-Prot;Acc:Q9Z0E6]
ENSMUSG00000047281	Sfn	0.686623345	0.120374121	1	up	no	1.112829	0.653538333	123	75	47	92	45	35	1.652147	1.030073	0.656267	1.000996	0.527011	0.432608	stratifin [Source:MGI Symbol;Acc:MGI:1891831]
ENSMUSG00000089762	Ier5l	0.685483852	0.001840537	0.128734887	up	no	5.360052	3.295045333	580	701	648	559	406	437	4.713993	5.848361	5.517802	3.679572	2.913558	3.292006	Immediate early response 5-like protein [Source:UniProtKB/Swiss-Prot;Acc:Q99J55]
ENSMUSG00000005087	Cd44	0.684996519	0.056427564	0.887644797	up	no	0.545662119	0.301606569	259	144	98	124	154	51	0.831069149	0.475885921	0.330031285	0.322529105	0.435249942	0.147040659	CD44 molecule (Indian blood group) [Source:HGNC Symbol;Acc:HGNC:1681]
ENSMUSG00000049999	Ppp1r3d	0.684815258	0.002692139	0.17005343	up	no	2.907315	1.770807	386	455	434	318	299	296	2.573702	3.114232	3.034011	1.720559	1.761852	1.83001	protein phosphatase 1 regulatory subunit 3D [Source:HGNC Symbol;Acc:HGNC:9294]
ENSMUSG00000046079	Lrrc8d	0.683161483	0.232939682	1	up	no	3.89100846	2.38559605	2120	2021	2425	152	2049	2366	3.675807198	3.59640419	4.400813993	0.211554132	3.13905239	3.806181628	Volume-regulated anion channel subunit LRRC8D [Source:UniProtKB/Swiss-Prot;Acc:Q8BGR2]
ENSMUSG00000067825	Pex26	0.682761502	0.031008288	0.69972847	up	no	1.448927101	0.864937726	481	207	420	196	253	319	1.846435758	0.814452516	1.685893028	0.606560132	0.856510379	1.131742668	Peroxisome assembly protein 26 [Source:UniProtKB/Swiss-Prot;Acc:Q8BGI5]
ENSMUSG00000026380	Tfcp2l1	0.678272996	0.010231482	0.413753007	up	no	0.502445666	0.276476062	173	212	251	106	184	120	0.398289067	0.501155522	0.607892408	0.197121912	0.376094733	0.256211541	Transcription factor CP2-like protein 1 [Source:UniProtKB/Swiss-Prot;Acc:Q3UNW5]
ENSMUSG00000043461	Sptssb	0.677654373	0.072444801	0.946778607	up	no	0.560154162	0.312715778	58	47	35	40	27	26	0.676242089	0.575402683	0.428817714	0.375563272	0.274755912	0.287828152	Serine palmitoyltransferase small subunit B [Source:UniProtKB/Swiss-Prot;Acc:Q925E8]
ENSMUSG00000050288	Fzd2	0.677210401	0.001419502	0.109120869	up	no	4.192901333	2.584666	753	700	613	470	483	534	4.481208	4.276433	3.821063	2.265402	2.540254	2.948342	Frizzled-2 [Source:UniProtKB/Swiss-Prot;Acc:Q9JIP6]
ENSMUSG00000015749	Anp32e	0.675058643	0.001008617	0.084729016	up	no	19.43320868	12.13378065	3681	2199	3431	1974	2760	2061	22.51593326	13.80271826	21.98097453	9.780559027	14.92643809	11.69434484	Acidic leucine-rich nuclear phosphoprotein 32 family member E [Source:UniProtKB/Swiss-Prot;Acc:P97822]
ENSMUSG00000027520	Zdbf2	0.674423645	0.001256188	0.100847788	up	no	2.483000467	1.51846286	1548	1267	1410	799	1355	861	2.665625823	2.240054832	2.543320745	1.115444279	2.06482883	1.375115472	zinc finger, DBF-type containing 2 [Source:MGI Symbol;Acc:MGI:1921134]
ENSMUSG00000024793	Tnfrsf25	0.674200842	0.076942819	0.959234964	up	no	1.753059814	1.061274157	117	151	270	129	90	164	1.106776129	1.465823805	2.686579508	0.996878551	0.751953505	1.434990415	tumor necrosis factor receptor superfamily, member 25 [Source:MGI Symbol;Acc:MGI:1934667]
ENSMUSG00000090100	Ttbk2	0.672726579	0.025188715	0.644427774	up	no	6.804823447	4.231533716	3625	3434	3368	3273	1114	3237	6.930568207	6.738238729	6.745663404	5.070868244	1.881519113	5.742213791	tau tubulin kinase 2 [Source:MGI Symbol;Acc:MGI:2155779]
ENSMUSG00000056144	Trim34a	0.672675067	0.056803577	0.888502845	up	no	1.102644973	0.65447016	151	145	91	80	127	62	1.263127653	1.244585198	0.800222068	0.543519294	0.939059376	0.480831811	tripartite motif-containing 34A [Source:MGI Symbol;Acc:MGI:2137359]
ENSMUSG00000054728	Phactr1	0.670646451	0.01300171	0.475087161	up	no	18.57174921	11.63006199	6024	5105	12688	5930	6405	5296	13.66838973	11.8825726	30.1642853	10.89866618	12.84687215	11.14464764	Phosphatase and actin regulator 1 [Source:UniProtKB/Swiss-Prot;Acc:Q2M3X8]
ENSMUSG00000020420	Zfp607a	0.666677356	0.09548621	1	up	no	0.292224035	0.147083828	89	50	42	48	53	8	0.420797573	0.245279168	0.210595365	0.186323354	0.220012758	0.034915374	zinc finger protein 607A [Source:MGI Symbol;Acc:MGI:3584526]
ENSMUSG00000103529	A730089K16Rik	0.664373101	0.137395687	1	up	no	0.742813	0.431783667	133	83	29	63	71	34	1.193597	0.763954	0.270888	0.452077	0.561743	0.281531	RIKEN cDNA A730089K16 gene [Source:MGI Symbol;Acc:MGI:2443970]
ENSMUSG00000022346	Myc	0.663739639	0.031770413	0.705299052	up	no	1.73714719	1.059680654	254	239	150	191	150	129	2.015679269	1.952858223	1.242904076	1.22403774	1.020398918	0.934605304	myelocytomatosis oncogene [Source:MGI Symbol;Acc:MGI:97250]
ENSMUSG00000030168	Adipor2	0.663563938	6.25E-06	0.00132221	up	no	12.13393571	7.623489216	3381	3458	2909	2448	2518	2220	12.33634827	12.95167844	11.11378043	7.232357763	8.124911321	7.513198564	adiponectin receptor 2 [Source:MGI Symbol;Acc:MGI:93830]
ENSMUSG00000036214	Znrd1as	0.663017189	0.051843015	0.862306767	up	no	1.589072941	0.96674433	128	105	134	113	85	70	1.611427276	1.369227776	1.786563771	1.15290644	0.945282074	0.802044475	zinc ribbon domain containing 1, antisense [Source:MGI Symbol;Acc:MGI:1923666]
ENSMUSG00000015652	Steap1	0.662191134	0.30503775	1	up	no	4.561916064	2.845947858	316	282	248	203	410	14	5.000044684	4.578367277	4.107336231	2.605161438	5.741351481	0.191330654	Metalloreductase STEAP1 [Source:UniProtKB/Swiss-Prot;Acc:Q9CWR7]
ENSMUSG00000110360	Gm45380	0.662146318	0.173727861	1	up	no	2.627879667	1.623849333	49	43	21	30	30	22	3.36905	2.996413	1.518176	1.67041	1.826584	1.374554	predicted gene 45380 [Source:MGI Symbol;Acc:MGI:5791216]
ENSMUSG00000021702	Thbs4	0.662138982	0.018416249	0.562040468	up	no	3.2799799	2.035946757	334	521	590	276	378	395	2.209541028	3.537286875	4.093111797	1.475421053	2.209643801	2.422775419	thrombospondin 4 [Source:MGI Symbol;Acc:MGI:1101779]
ENSMUSG00000062861	Zfp28	0.66029835	0.023066021	0.62030848	up	no	0.7410973	0.432202156	215	118	168	104	132	107	0.938879402	0.522809349	0.76160315	0.361818177	0.505986999	0.428801292	zinc finger protein 28 [Source:MGI Symbol;Acc:MGI:99175]
ENSMUSG00000048109	Rbm15	0.659095653	0.001307451	0.104029316	up	no	1.932350666	1.187037149	652	574	700	437	498	453	1.916300945	1.727056457	2.153694597	1.037423222	1.290374656	1.23331357	RNA binding motif protein 15 [Source:MGI Symbol;Acc:MGI:2443205]
ENSMUSG00000036062	Phf24	0.65853054	0.147453122	1	up	no	19.73354365	12.46501093	8606	7595	2785	2613	2503	8491	26.37831836	23.89008923	8.93222337	6.480597911	6.775065329	24.13936955	Mus musculus PHD finger protein 24 (Phf24), transcript variant 5, mRNA. [Source:RefSeq mRNA;Acc:NM_001355695]
ENSMUSG00000056708	Ier5	0.657623766	0.000100448	0.013991426	up	no	16.91924033	10.68886333	2127	2504	2792	1927	1726	1862	14.167111	17.114719	19.475891	10.3966	10.165961	11.504029	Immediate early response 5 protein [Source:UniProtKB/Swiss-Prot;Acc:O89113]
ENSMUSG00000017830	Dhx58	0.65759827	0.053722164	0.872891428	up	no	0.439799434	0.242196545	87	48	61	48	52	29	0.577979932	0.324694234	0.416724137	0.252927396	0.299339584	0.174322656	Probable ATP-dependent RNA helicase DHX58 [Source:UniProtKB/Swiss-Prot;Acc:Q99J87]
ENSMUSG00000047777	Phf13	0.657328186	0.001078335	0.089640648	up	no	5.316541	3.334365667	789	735	765	645	589	460	5.36902	5.129931	5.450672	3.554025	3.544748	2.904324	PHD finger protein 13 [Source:MGI Symbol;Acc:MGI:2446217]
ENSMUSG00000019850	Tnfaip3	0.657042478	0.005997453	0.301053806	up	no	1.167227313	0.70364645	423	300	414	309	238	265	1.272206088	0.925813623	1.303662229	0.747324122	0.626587077	0.73702815	tumor necrosis factor, alpha-induced protein 3 [Source:MGI Symbol;Acc:MGI:1196377]
ENSMUSG00000044362	Ccdc89	0.654803442	0.158453301	1	up	no	0.388030333	0.209978333	20	41	48	16	46	8	0.203703	0.437297	0.523091	0.130318	0.42262	0.076997	Coiled-coil domain-containing protein 89 [Source:UniProtKB/Swiss-Prot;Acc:Q9DA73]
ENSMUSG00000032278	Paqr5	0.653881396	0.034007645	0.725068441	up	no	1.709153068	1.049839964	247	399	262	256	281	127	1.359367832	2.254824008	1.513267363	1.138130437	1.364256053	0.647133402	Membrane progestin receptor gamma [Source:UniProtKB/Swiss-Prot;Acc:Q9DCU0]
ENSMUSG00000037411	Serpine1	0.650586642	0.032795283	0.715169662	up	no	0.302714965	0.156537982	44	57	58	36	36	26	0.244397494	0.328046738	0.335700663	0.161966714	0.175970267	0.131676966	serine (or cysteine) peptidase inhibitor, clade E, member 1 [Source:MGI Symbol;Acc:MGI:97608]
ENSMUSG00000021217	Tshz3	0.65049359	0.002710449	0.170059397	up	no	2.084608259	1.291731601	500	515	513	368	344	396	2.000154889	2.10882167	2.144848218	1.192252703	1.215452527	1.467489574	teashirt zinc finger homeobox 3 [Source:HGNC Symbol;Acc:HGNC:30700]
ENSMUSG00000006010	BC003331	0.650009904	0.00908697	0.389711426	up	no	7.776579879	4.919554836	1516	1471	1305	790	879	1469	8.052226907	8.020356184	7.257156547	3.39750793	4.124665658	7.23649092	odr-4 GPCR localization factor homolog [Source:HGNC Symbol;Acc:HGNC:24299]
ENSMUSG00000028125	Abca4	0.649663708	0.285097377	1	up	no	1.623947126	0.998893687	1108	797	733	573	1305	43	2.002826622	1.480979285	1.388035469	0.83678871	2.089663713	0.070228639	ATP-binding cassette, sub-family A (ABC1), member 4 [Source:MGI Symbol;Acc:MGI:109424]
ENSMUSG00000058402	Zfp420	0.648895633	0.117692216	1	up	no	0.815829343	0.484086952	97	401	139	102	187	152	0.35737601	1.551111168	0.539000851	0.305427254	0.6188633	0.527970302	zinc finger protein 420 [Source:MGI Symbol;Acc:MGI:2444666]
ENSMUSG00000033792	Atp7a	0.647883515	0.009231938	0.392827401	up	no	1.187443418	0.721666876	562	401	436	268	457	268	1.399959975	1.024583721	1.137786557	0.541303467	1.006630557	0.617066603	Copper-transporting ATPase 1 [Source:UniProtKB/Swiss-Prot;Acc:Q64430]
ENSMUSG00000020423	Btg2	0.647679313	0.00047416	0.050785418	up	no	7.605709667	4.818602667	984	834	983	740	719	629	7.822336	6.804516	8.190277	4.765231	5.05199	4.638587	Protein BTG2 [Source:UniProtKB/Swiss-Prot;Acc:Q04211]
ENSMUSG00000049796	Crh	0.647144233	0.053845709	0.873157735	up	no	1.761005333	1.088332	106	108	99	74	68	84	1.74703	1.824508	1.711478	0.987265	0.993469	1.284262	Corticoliberin [Source:UniProtKB/Swiss-Prot;Acc:Q8CIT0]
ENSMUSG00000067869	Tcea1-ps1	0.646231833	0.055604615	0.881894609	up	no	8.086714	5.130876333	333	299	350	140	229	348	8.031185	7.390013	8.838944	2.733955	4.877182	7.781492	transcription elongation factor A (SII) 1, pseudogene 1 [Source:MGI Symbol;Acc:MGI:1861432]
ENSMUSG00000038963	Slco4a1	0.645783907	0.034566997	0.728768895	up	no	0.271264249	0.13729184	67	60	51	25	33	48	0.297172574	0.275780941	0.240839232	0.088422117	0.125793644	0.19765976	Mus musculus solute carrier organic anion transporter family, member 4a1 (Slco4a1), transcript variant 2, mRNA. [Source:RefSeq mRNA;Acc:NM_001355218]
ENSMUSG00000036106	Prr5	0.645373231	0.010996955	0.434993629	up	no	4.533155938	2.862103413	424	426	322	295	354	222	4.814512315	4.964127383	3.820828116	2.711925321	3.547754685	2.326630232	Proline-rich protein 5 [Source:UniProtKB/Swiss-Prot;Acc:Q812A5]
ENSMUSG00000043313	Pcdhb19	0.645050302	0.462905348	1	up	no	1.193785	0.727337333	359	462	325	0	360	427	1.095114	1.446483	1.039758	0	0.971251	1.210761	protocadherin beta 19 [Source:MGI Symbol;Acc:MGI:2136757]
ENSMUSG00000067212	H2-T23	0.64335547	0.016347516	0.534970807	up	no	3.4360322	2.163846191	479	325	532	430	294	276	3.61074029	2.501779008	4.195577301	2.612740012	1.950386195	1.928412366	H-2 class I histocompatibility antigen, D-37 alpha chain [Source:UniProtKB/Swiss-Prot;Acc:P06339]
ENSMUSG00000041308	Sntb2	0.642814404	0.000490479	0.051881183	up	no	3.988813168	2.518730759	1658	2091	1791	1336	1666	1112	3.494074408	4.520922424	3.951442672	2.279166749	3.103414681	2.173610848	syntrophin, basic 2 [Source:MGI Symbol;Acc:MGI:101771]
ENSMUSG00000027074	Slc43a3	0.640986249	0.06512058	0.924451298	up	no	0.552586124	0.318486784	163	66	107	82	96	51	0.791217106	0.325710211	0.540831054	0.322868578	0.406559929	0.226031844	Solute carrier family 43 member 3 [Source:UniProtKB/Swiss-Prot;Acc:A2AVZ9]
ENSMUSG00000020745	Pafah1b1	0.640670772	0.019981207	0.57637156	up	no	29.37222932	18.80391988	21277	8026	8908	9296	10437	8744	48.26954627	18.68248472	21.16465697	17.08305509	20.93086517	18.39783938	platelet-activating factor acetylhydrolase, isoform 1b, subunit 1 [Source:MGI Symbol;Acc:MGI:109520]
ENSMUSG00000086414	Gm15645	0.639481481	0.058060938	0.890474606	up	no	0.710456436	0.420267345	108	74	62	55	67	47	0.923236364	0.648046255	0.560086691	0.380295273	0.509581964	0.3709248	predicted gene 15645 [Source:MGI Symbol;Acc:MGI:3783089]
ENSMUSG00000023781	Hes7	0.637686369	0.079388604	0.963670826	up	no	0.705377	0.417650333	57	69	47	40	41	40	0.687268	0.842519	0.586344	0.386281	0.427692	0.438978	Transcription factor HES-7 [Source:UniProtKB/Swiss-Prot;Acc:Q8BKT2]
ENSMUSG00000041481	Serpina3g	0.636941416	0.065891441	0.929725383	up	no	1.066805753	0.65034344	97	79	129	80	78	64	0.987590599	0.8398571	1.372969561	0.660871481	0.684787982	0.605370858	serine (or cysteine) peptidase inhibitor, clade A, member 3G [Source:MGI Symbol;Acc:MGI:105046]
ENSMUSG00000096727	Psmb9	0.636736223	0.044053659	0.809405275	up	no	0.680863172	0.402224897	97	129	114	106	76	57	0.568704137	0.777385773	0.696499606	0.503120969	0.392648559	0.310905163	proteasome (prosome, macropain) subunit, beta type 9 (large multifunctional peptidase 2) [Source:MGI Symbol;Acc:MGI:1346526]
ENSMUSG00000033540	Idua	0.636186964	0.027545824	0.669227522	up	no	1.57878364	0.980148258	190	365	338	250	210	198	0.980528022	1.937497951	1.818324946	1.041621211	0.952123608	0.946699954	iduronidase, alpha-L- [Source:MGI Symbol;Acc:MGI:96418]
ENSMUSG00000096938	9530052E02Rik	0.635981813	0.061845871	0.905572466	up	no	0.915602454	0.553542958	88	74	67	58	51	54	1.029175872	0.890914938	0.826716551	0.545447117	0.524507014	0.590674743	RIKEN cDNA 9530052E02 gene [Source:MGI Symbol;Acc:MGI:3588277]
ENSMUSG00000026655	Fam107b	0.634668818	0.024368979	0.637163265	up	no	5.191803474	3.308390573	1047	1055	917	1048	406	822	5.27555327	5.457614883	4.84224227	4.277554839	1.806405465	3.841211415	Protein FAM107B [Source:UniProtKB/Swiss-Prot;Acc:Q3TGF2]
ENSMUSG00000103332	Pcdhga2	0.63444582	0.106413015	1	up	no	3.883603333	2.466190333	863	1316	278	476	788	548	4.014832	6.284448	1.35153	1.793276	3.24117	2.364125	protocadherin gamma subfamily A, 2 [Source:MGI Symbol;Acc:MGI:1935214]
ENSMUSG00000057101	Zfp180	0.634040132	0.103793772	1	up	no	10.84784017	6.954453095	2217	2316	2109	2354	2309	447	10.60681969	11.37232184	10.56437897	9.122670232	9.763703687	1.976985365	zinc finger protein 180 [Source:MGI Symbol;Acc:MGI:1923701]
ENSMUSG00000113188	Gm35638	0.632925532	0.169238916	1	up	no	1.224000333	0.753804667	23	45	41	28	31	21	0.751219	1.515072	1.40571	0.735794	0.892999	0.632621	predicted gene, 35638 [Source:MGI Symbol;Acc:MGI:5594797]
ENSMUSG00000034957	Cebpa	0.632270151	0.001220576	0.098963803	up	no	7.626011306	4.884516736	849	947	902	761	589	684	7.018719019	8.040062184	7.819252714	5.097905802	4.30785836	5.247786047	CCAAT/enhancer-binding protein alpha [Source:UniProtKB/Swiss-Prot;Acc:P53566]
ENSMUSG00000031785	Adgrg1	0.631824063	1.80E-05	0.003304127	up	no	12.00235151	7.710372874	3163	2834	2755	2174	2310	2106	12.72104567	11.69016377	11.5958451	7.072596629	8.208308414	7.850213579	Adhesion G-protein coupled receptor G1 ADGRG1 N-terminal fragment ADGRG1 C-terminal fragment [Source:UniProtKB/Swiss-Prot;Acc:Q8K209]
ENSMUSG00000113068	Gm48133	0.631312345	0.043619529	0.805972181	up	no	8.102688667	5.195564667	212	161	161	120	157	124	9.445043	7.356683	7.50634	4.328719	6.156974	5.101001	predicted gene, 48133 [Source:MGI Symbol;Acc:MGI:6097494]
ENSMUSG00000104204	Gm37397	0.629733932	0.104411973	1	up	no	0.327981667	0.176602667	19	41	66	34	23	24	0.139592	0.317606	0.526747	0.210301	0.15132	0.168187	predicted gene, 37397 [Source:MGI Symbol;Acc:MGI:5610625]
ENSMUSG00000114051	Gm48008	0.628183409	0.164411829	1	up	no	1.468558667	0.914842667	44	62	27	28	38	31	1.430344	2.053173	0.922159	0.734041	1.088435	0.922052	predicted gene, 48008 [Source:MGI Symbol;Acc:MGI:6097313]
ENSMUSG00000054611	Kdm2a	0.627387279	0.020171063	0.577407216	up	no	4.847297589	3.102621722	3711	3633	2002	1828	1835	3240	5.659639813	5.683715663	3.19853729	2.254336048	2.470717445	4.582811672	lysine demethylase 2A [Source:HGNC Symbol;Acc:HGNC:13606]
ENSMUSG00000106990	Gm42547	0.626659584	0.011026834	0.435119413	up	no	1.849819	1.162847667	298	351	295	236	273	190	1.709444	2.065084	1.774929	1.096846	1.383294	1.008403	predicted gene 42547 [Source:MGI Symbol;Acc:MGI:5662684]
ENSMUSG00000031145	Prickle3	0.625678839	0.060244809	0.902649713	up	no	0.249222123	0.126336007	40	71	56	20	26	52	0.171493728	0.321556421	0.25461622	0.070079075	0.099722448	0.209206498	Prickle planar cell polarity protein 3 [Source:UniProtKB/Swiss-Prot;Acc:Q80VL3]
ENSMUSG00000030847	Bag3	0.62417636	0.008246085	0.368973832	up	no	4.120073333	2.637941667	475	445	497	439	366	271	4.038905	3.888205	4.43311	3.02703	2.751399	2.135396	BAG family molecular chaperone regulator 3 [Source:UniProtKB/Swiss-Prot;Acc:Q9JLV1]
ENSMUSG00000073733	Rsg1	0.623783491	0.117752638	1	up	no	0.604530041	0.357216584	41	54	59	45	46	19	0.46388588	0.641892366	0.707811879	0.411383432	0.464836563	0.195429757	REM2- and Rab-like small GTPase 1 [Source:UniProtKB/Swiss-Prot;Acc:A2A825]
ENSMUSG00000098387	Pet117	0.62246305	0.477311115	1	up	no	8.638345667	5.576088667	292	235	278	293	333	1	9.165415	7.579957	9.169665	7.458731	9.269506	2.90E-05	, mitochondrial [Source:UniProtKB/Swiss-Prot;Acc:P0DJF2]
ENSMUSG00000033871	Ppargc1b	0.622412958	0.011770064	0.449219521	up	no	1.954847447	1.234795135	375	352	323	214	276	282	2.04960866	1.96889155	1.846042132	0.93983091	1.334332794	1.430221702	Peroxisome proliferator-activated receptor gamma coactivator 1-beta [Source:UniProtKB/Swiss-Prot;Acc:Q8VHJ7]
ENSMUSG00000051590	Map3k19	0.622297998	0.031619596	0.705265247	up	no	1.231840659	0.765210747	256	305	250	160	287	144	1.139089271	1.389446706	1.166986001	0.573509709	1.132242193	0.58988034	Mitogen-activated protein kinase kinase kinase 19 [Source:UniProtKB/Swiss-Prot;Acc:E9Q3S4]
ENSMUSG00000041046	Ramp3	0.622051707	0.039930453	0.77466908	up	no	3.352030035	2.142943548	162	210	248	162	155	152	2.555112841	3.39947871	4.101498554	2.061558746	2.145250433	2.222021465	Receptor activity-modifying protein 3 [Source:UniProtKB/Swiss-Prot;Acc:Q9WUP1]
ENSMUSG00000035021	Baz1a	0.61941721	0.091956002	1	up	no	0.331777714	0.181058719	94	116	115	70	122	20	0.281611829	0.354173657	0.359547656	0.169163529	0.320054547	0.053958081	Bromodomain adjacent to zinc finger domain protein 1A [Source:UniProtKB/Swiss-Prot;Acc:O88379]
ENSMUSG00000074170	Plekhf1	0.617492648	0.022519089	0.615093254	up	no	1.46677	0.921225	311	463	264	216	271	273	1.286691	1.968504	1.145115	0.725013	0.992034	1.046628	Pleckstrin homology domain-containing family F member 1 [Source:UniProtKB/Swiss-Prot;Acc:Q3TB82]
ENSMUSG00000064262	Gimap8	0.614364459	0.100680861	1	up	no	0.262689864	0.136915398	24	44	62	28	42	12	0.140950017	0.265854472	0.381265103	0.130917092	0.218618195	0.061210908	GTPase IMAP family member 8 [Source:UniProtKB/Swiss-Prot;Acc:Q75N62]
ENSMUSG00000034579	Pla2g3	0.614027416	0.032055142	0.707862658	up	no	0.340553111	0.187844279	79	83	58	52	42	49	0.356541679	0.383496961	0.281620692	0.18998506	0.165794707	0.207753069	phospholipase A2, group III [Source:MGI Symbol;Acc:MGI:2444945]
ENSMUSG00000041782	Lad1	0.613874605	0.063496656	0.915757263	up	no	0.751437252	0.456362663	129	93	123	57	90	96	0.823771313	0.609293813	0.821246629	0.29403232	0.508458763	0.566596907	Ladinin-1 [Source:UniProtKB/Swiss-Prot;Acc:P57016]
ENSMUSG00000035329	Fbxo33	0.612147237	0.012092285	0.45617585	up	no	9.143180645	5.947094571	1856	1899	1729	1763	1727	753	9.064110609	9.516441504	8.848989822	6.97216727	7.459208566	3.409907878	F-box only protein 33 [Source:UniProtKB/Swiss-Prot;Acc:Q8VE08]
ENSMUSG00000072082	Ccnf	0.611272225	0.024223341	0.636722237	up	no	1.42206	0.896369667	217	181	194	153	148	138	1.528044	1.30791	1.430226	0.870708	0.917156	0.901245	Cyclin-F [Source:UniProtKB/Swiss-Prot;Acc:P51944]
ENSMUSG00000032719	Sbspon	0.611083894	0.084469759	0.979786452	up	no	0.327482333	0.179874667	48	33	42	15	35	28	0.376913	0.263204	0.34233	0.090897	0.244739	0.203988	Somatomedin-B and thrombospondin type-1 domain-containing protein [Source:UniProtKB/Swiss-Prot;Acc:Q3UPR9]
ENSMUSG00000089922	Gm43517	0.61052903	0.050997007	0.85946042	up	no	0.399214333	0.226963667	71	88	52	45	46	50	0.392528	0.500852	0.304263	0.200532	0.224386	0.255973	_
ENSMUSG00000087639	Gm15512	0.609864135	0.084088161	0.979786452	up	no	1.050579667	0.653927	100	97	123	56	112	64	0.959131	0.954971	1.237637	0.433842	0.954928	0.573011	predicted gene 15512 [Source:MGI Symbol;Acc:MGI:3782960]
ENSMUSG00000040943	Tet2	0.609224156	0.001083586	0.089640648	up	no	1.250287578	0.785179867	825	954	1053	694	816	589	1.064477814	1.263565894	1.422819027	0.723722147	0.930463745	0.701353709	Mus musculus tet methylcytosine dioxygenase 2 (Tet2), transcript variant 2, mRNA. [Source:RefSeq mRNA;Acc:NM_001346736]
ENSMUSG00000087334	AW495222	0.609166994	0.125584752	1	up	no	1.424934442	0.899709078	68	41	69	40	52	40	1.601744017	0.983910668	1.68914864	0.757508696	1.073932296	0.867686242	expressed sequence AW495222 [Source:MGI Symbol;Acc:MGI:2145435]
ENSMUSG00000034917	Tjp3	0.607515672	0.133853135	1	up	no	1.027336818	0.639900381	190	221	107	184	156	46	1.113224452	1.324314637	0.644471365	0.869268627	0.804720044	0.245712472	tight junction protein 3 [Source:MGI Symbol;Acc:MGI:1351650]
ENSMUSG00000040152	Thbs1	0.607453191	0.067501558	0.931750237	up	no	0.988985899	0.614760633	263	279	266	249	270	81	0.940977898	1.027524236	0.998455562	0.723029977	0.853533967	0.267717955	thrombospondin 1 [Source:MGI Symbol;Acc:MGI:98737]
ENSMUSG00000034765	Dusp5	0.606199629	0.002212215	0.147756024	up	no	15.07878867	9.871324333	1570	1674	1756	1653	1004	1218	13.855505	15.15221	16.228651	11.811574	7.833811	9.968588	dual specificity phosphatase 5 [Source:HGNC Symbol;Acc:HGNC:3071]
ENSMUSG00000004655	Aqp1	0.605439015	0.394602727	1	up	no	9.222437	6.027370667	1200	1167	892	940	1572	29	9.962749	9.94287	7.761692	6.321817	11.544507	0.215788	Aquaporin-1 [Source:UniProtKB/Swiss-Prot;Acc:Q02013]
ENSMUSG00000107881	Gm44250	0.603033894	0.186031343	1	up	no	2.420255667	1.559255667	529	515	335	349	624	79	2.728503	2.722369	1.809895	1.457439	2.845705	0.374623	predicted gene, 44250 [Source:MGI Symbol;Acc:MGI:5690642]
ENSMUSG00000054720	Lrrc8c	0.602980435	0.000622346	0.059312097	up	no	5.131188661	3.344174805	1763	1743	1767	1345	1616	1081	5.025809516	5.096020884	5.271735583	3.104118822	4.071925968	2.856479625	Volume-regulated anion channel subunit LRRC8C [Source:UniProtKB/Swiss-Prot;Acc:Q8R502]
ENSMUSG00000040298	Btbd16	0.602133141	0.066219016	0.931122786	up	no	0.535052113	0.318359108	66	91	111	82	55	54	0.384247255	0.544963735	0.675945349	0.38785563	0.276074134	0.291147561	BTB/POZ domain-containing protein 16 [Source:UniProtKB/Swiss-Prot;Acc:E9Q173]
ENSMUSG00000069911	Fam196b	0.602081581	0.112912164	1	up	no	0.320083811	0.176752358	119	60	55	20	49	78	0.479500433	0.249304	0.231447	0.064345	0.173908074	0.292004	Protein FAM196B [Source:UniProtKB/Swiss-Prot;Acc:Q6GQV1]
ENSMUSG00000029343	Crybb1	0.60114296	0.051082392	0.86001006	up	no	3.667862814	2.383893777	141	164	181	126	110	135	3.106430863	3.716651293	4.180506286	2.247340477	2.146563247	2.757777606	Beta-crystallin B1 Beta-crystallin B1B [Source:UniProtKB/Swiss-Prot;Acc:Q9WVJ5]
ENSMUSG00000006362	Cbfa2t3	0.60060881	0.002966028	0.181038791	up	no	4.686444529	3.056543385	2314	1563	1415	1300	1270	1452	6.026036549	4.175257384	3.858039655	2.742624851	2.923901336	3.503103968	Protein CBFA2T3 [Source:UniProtKB/Swiss-Prot;Acc:O54972]
ENSMUSG00000006014	Prg4	0.600357242	0.085763741	0.983597248	up	no	0.37282375	0.211870104	117	57	45	32	53	57	0.590182959	0.29313902	0.235149271	0.130154968	0.237537746	0.267917598	proteoglycan 4 (megakaryocyte stimulating factor, articular superficial zone protein) [Source:MGI Symbol;Acc:MGI:1891344]
ENSMUSG00000034739	Mfrp	0.600177944	0.389725309	1	up	no	7.941533088	5.204778924	1674	1784	1176	1317	2255	46	8.418666165	9.209312168	6.196620932	5.367200228	10.03250567	0.214630876	Membrane frizzled-related protein [Source:UniProtKB/Swiss-Prot;Acc:Q8K480]
ENSMUSG00000056313	Tcim	0.598505736	0.129266803	1	up	no	1.359566	0.863952333	108	151	72	74	120	54	1.304693	1.871943	0.902062	0.724209	1.272882	0.594766	Transcriptional and immune response regulator [Source:UniProtKB/Swiss-Prot;Acc:Q9D915]
ENSMUSG00000001672	Marveld3	0.597597084	0.128921447	1	up	no	0.286041271	0.155116818	57	53	21	42	33	9	0.371313168	0.353903011	0.132907635	0.22562209	0.192023374	0.04770499	MARVEL domain containing 3 [Source:HGNC Symbol;Acc:HGNC:30525]
ENSMUSG00000054181	A930012O16Rik	0.596519834	0.070106488	0.938967994	up	no	1.894899667	1.219321667	135	109	149	128	86	86	1.906674	1.580458	2.197567	1.459743	1.07288	1.125342	RIKEN cDNA A930012O16 gene [Source:MGI Symbol;Acc:MGI:2442255]
ENSMUSG00000111375	Btbd8	0.595966821	0.000606212	0.058458252	up	no	10.25994163	6.754147073	2815	3964	3991	2686	3216	2441	7.830753291	11.31860235	11.63046925	6.053613	7.910843832	6.297984387	BTB/POZ domain-containing protein 8 [Source:UniProtKB/Swiss-Prot;Acc:D3YUB6]
ENSMUSG00000097546	Gm26749	0.594053584	0.098399371	1	up	no	0.937440333	0.587282333	82	84	78	51	87	42	0.924715	0.972822	0.914784	0.45734	0.8651	0.439407	predicted gene, 26749 [Source:MGI Symbol;Acc:MGI:5477243]
ENSMUSG00000034157	Cipc	0.593221796	0.015905263	0.527918668	up	no	15.52322278	10.25602454	3433	3456	3253	3789	2860	1368	15.39325157	15.90357773	15.27283905	13.76187985	11.32696061	5.679233175	CLOCK-interacting pacemaker [Source:UniProtKB/Swiss-Prot;Acc:Q8R0W1]
ENSMUSG00000024256	Adcyap1	0.591638256	0.033258161	0.717891718	up	no	2.687843333	1.749982	245	234	275	210	227	143	2.555804	2.507643	3.000083	1.776543	2.094052	1.379351	adenylate cyclase activating polypeptide 1 [Source:MGI Symbol;Acc:MGI:105094]
ENSMUSG00000037705	Tecta	0.590075938	0.023329434	0.623278335	up	no	0.179781119	0.085860819	71	50	60	27	28	47	0.205339104	0.150698816	0.183305438	0.060533207	0.072245288	0.124803961	tectorin alpha [Source:MGI Symbol;Acc:MGI:109575]
ENSMUSG00000109130	Gm45187	0.589843315	0.114151399	1	up	no	0.611932186	0.373018468	114	67	79	84	76	29	0.789817843	0.472976989	0.573001726	0.472194738	0.46216009	0.184700575	predicted gene 45187 [Source:MGI Symbol;Acc:MGI:5753763]
ENSMUSG00000026479	Lamc2	0.589562755	0.027142881	0.669227522	up	no	0.441661992	0.25995838	187	172	124	81	143	105	0.504265456	0.473124759	0.347595761	0.176116967	0.340231722	0.263526452	laminin subunit gamma 2 [Source:HGNC Symbol;Acc:HGNC:6493]
ENSMUSG00000015468	Notch4	0.589493538	0.01163472	0.447991777	up	no	1.297838146	0.828969918	455	527	434	377	441	250	1.220180432	1.449250142	1.224083865	0.819807885	1.047560231	0.619541638	notch 4 [Source:MGI Symbol;Acc:MGI:107471]
ENSMUSG00000068323	Slc4a5	0.588896816	0.582474079	1	up	no	4.891613885	3.218680001	1622	1163	1042	860	2120	0	6.094051348	4.481269325	4.099520984	2.613383327	7.042656675	0	solute carrier family 4 member 5 [Source:HGNC Symbol;Acc:HGNC:18168]
ENSMUSG00000019874	Fabp7	0.588863642	0.014227909	0.503346393	up	no	14.94285393	9.901488011	737	933	836	782	767	423	12.85572464	16.70119623	15.2716409	11.04269113	11.82860736	6.833165542	Fatty acid-binding protein, brain [Source:UniProtKB/Swiss-Prot;Acc:P51880]
ENSMUSG00000009687	Fxyd5	0.588124336	0.026550387	0.661608026	up	no	1.207507085	0.769763112	252	241	198	194	161	167	1.301164108	1.262870963	1.058486185	0.803379971	0.719289491	0.786619873	FXYD domain-containing ion transport regulator 5 [Source:UniProtKB/Swiss-Prot;Acc:P97808]
ENSMUSG00000034640	Tiparp	0.587867612	0.001726328	0.123938165	up	no	4.702953158	3.095527552	915	1020	820	745	759	628	4.575791843	5.237522995	4.295544636	3.019765454	3.350803393	2.91601381	TCDD-inducible poly(ADP-ribose) polymerase [Source:MGI Symbol;Acc:MGI:2159210]
ENSMUSG00000002897	Il17ra	0.587044013	0.008990577	0.386594813	up	no	0.909253073	0.571865319	377	321	361	307	224	254	0.94710284	0.828722042	0.951934335	0.624933253	0.498061723	0.59260098	Interleukin-17 receptor A [Source:UniProtKB/Swiss-Prot;Acc:Q60943]
ENSMUSG00000109669	Gm45472	0.585286207	0.120563574	1	up	no	1.089356333	0.692726333	69	85	55	54	68	35	1.055011	1.333936	0.879122	0.667223	0.917997	0.492959	predicted gene 45472 [Source:MGI Symbol;Acc:MGI:5791308]
ENSMUSG00000024866	Acy3	0.584609513	0.173470462	1	up	no	0.839236667	0.526311	32	59	79	58	42	28	0.45423	0.869165	1.194315	0.681071	0.526023	0.371839	N-acyl-aromatic-L-amino acid amidohydrolase (carboxylate-forming) [Source:UniProtKB/Swiss-Prot;Acc:Q91XE4]
ENSMUSG00000025509	Pnpla2	0.58453814	0.000945805	0.081554411	up	no	8.323491402	5.517312994	1101	1136	1138	899	881	847	7.948800453	8.419047447	8.602626305	5.257137732	5.620732782	5.674068469	patatin-like phospholipase domain containing 2 [Source:MGI Symbol;Acc:MGI:1914103]
ENSMUSG00000028152	Tspan5	0.583906208	0.058137386	0.890474606	up	no	18.76651584	12.48688955	6217	6388	6007	3208	3118	7905	18.36276361	19.3592481	18.5775358	7.669198881	8.13524609	21.65622367	tetraspanin 5 [Source:MGI Symbol;Acc:MGI:1928096]
ENSMUSG00000010358	Ifi35	0.58351008	0.072056367	0.945434597	up	no	2.332797053	1.523498323	153	195	195	100	148	164	1.912427407	2.511873868	2.574089885	1.00880432	1.651865461	1.909825188	Interferon-induced 35 kDa protein homolog [Source:UniProtKB/Swiss-Prot;Acc:Q9D8C4]
ENSMUSG00000007617	Homer1	0.583195869	8.83E-05	0.012554988	up	no	11.09087692	7.36972596	5628	5805	6379	4162	5066	4625	10.25354313	10.84842153	12.17066608	6.137480396	8.157514187	7.814183299	Homer protein homolog 1 [Source:UniProtKB/Swiss-Prot;Acc:Q9Z2Y3]
ENSMUSG00000086873	Gm15672	0.582987212	0.106352208	1	up	no	1.245640333	0.798322667	74	75	79	55	75	42	1.191196	1.227432	1.318293	0.716921	1.062525	0.615522	predicted gene 15672 [Source:MGI Symbol;Acc:MGI:3783114]
ENSMUSG00000017418	Arl5b	0.582684748	0.001431664	0.109539071	up	no	3.775106588	2.487486338	1921	1491	1875	1190	1456	1421	4.019059036	3.198574251	4.107686478	2.013454271	2.691977276	2.757027468	ADP ribosylation factor like GTPase 5B [Source:HGNC Symbol;Acc:HGNC:23052]
ENSMUSG00000103570	C630004M23Rik	0.582505036	0.136668856	1	up	no	0.731458	0.455250333	64	52	50	48	51	24	0.82532	0.691507	0.677547	0.496575	0.581261	0.287915	RIKEN cDNA C630004M23 gene [Source:MGI Symbol;Acc:MGI:3642399]
ENSMUSG00000004951	Hspb1	0.582136159	0.012251707	0.459337613	up	no	10.76847546	7.159858962	576	482	438	380	445	341	12.1752918	10.43181799	9.698316599	6.493482498	8.305226566	6.680867823	Heat shock protein beta-1 [Source:UniProtKB/Swiss-Prot;Acc:P14602]
ENSMUSG00000001123	Lgals9	0.581597999	0.010141546	0.413102518	up	no	4.532736755	2.995702229	452	453	399	344	341	326	4.599130596	4.737778517	4.261301151	2.833271434	3.076339878	3.077495375	Galectin-9 [Source:UniProtKB/Swiss-Prot;Acc:O08573]
ENSMUSG00000048949	Gm6206	0.581041756	0.026250961	0.658172182	up	no	4.284650333	2.831055	438	436	393	419	362	213	4.339605	4.437981	4.076365	3.36462	3.171119	1.957426	predicted pseudogene 6206 [Source:MGI Symbol;Acc:MGI:3644890]
ENSMUSG00000086717	Gm15655	0.580709763	0.198625544	1	up	no	2.568193667	1.684047	66	45	42	32	57	29	3.257395	2.288075	2.159111	1.26022	2.465955	1.325966	predicted gene 15655 [Source:MGI Symbol;Acc:MGI:3805551]
ENSMUSG00000031700	Gpt2	0.579481164	1.77E-05	0.003294886	up	no	16.69410491	11.1386889	4079	4359	4203	3555	3257	3111	15.77099935	17.29251723	17.01879814	11.13237093	11.13001466	11.1536811	glutamic pyruvate transaminase (alanine aminotransferase) 2 [Source:MGI Symbol;Acc:MGI:1915391]
ENSMUSG00000038894	Irs2	0.579430406	2.56E-05	0.004387683	up	no	19.04807867	12.71442933	5722	5345	5107	4784	3999	3925	19.750969	18.930119	18.463148	13.376378	12.201507	12.565403	Insulin receptor substrate 2 [Source:UniProtKB/Swiss-Prot;Acc:P81122]
ENSMUSG00000087301	Gm13629	0.579198669	0.173214806	1	up	no	1.067344276	0.681344907	65	52	49	53	53	20	1.227981963	1.011605512	0.962445354	0.814002524	0.88388311	0.346149085	_
ENSMUSG00000097247	1500012K07Rik	0.578310058	0.330673364	1	up	no	0.338859296	0.193925068	71	44	9	30	4	48	0.586926751	0.358724949	0.070926187	0.197320719	0.019615466	0.364839019	RIKEN cDNA 1500012K07 gene [Source:MGI Symbol;Acc:MGI:1916204]
ENSMUSG00000048546	Tob2	0.57790353	0.000680284	0.062992003	up	no	5.187514052	3.442299171	1586	1552	1507	1112	1325	1172	5.186760749	5.211064189	5.164717219	2.943801055	3.830528008	3.55256845	transducer of ERBB2, 2 [Source:MGI Symbol;Acc:MGI:1888525]
ENSMUSG00000048070	Pirt	0.577536993	0.09378335	1	up	no	0.749767	0.469434667	91	163	168	152	96	70	0.472638	0.866773	0.90989	0.636732	0.437874	0.333698	Phosphoinositide-interacting protein [Source:UniProtKB/Swiss-Prot;Acc:Q8BFY0]
ENSMUSG00000024610	Cd74	0.577359666	0.169389269	1	up	no	3.636799942	2.404362948	354	208	133	180	277	84	5.468527766	3.28739406	2.154478	2.238057391	3.781971081	1.19306037	CD74 antigen (invariant polypeptide of major histocompatibility complex, class II antigen-associated) [Source:MGI Symbol;Acc:MGI:96534]
ENSMUSG00000029516	Cit	0.576700196	0.007809351	0.358688348	up	no	2.44887805	1.609011558	1935	2122	1360	1074	1415	1640	2.570482245	2.890104212	1.886047693	1.151760002	1.657861769	2.017412902	citron rho-interacting serine/threonine kinase [Source:HGNC Symbol;Acc:HGNC:1985]
ENSMUSG00000016496	Cd274	0.575824891	0.056221531	0.886972213	up	no	0.803185333	0.505949333	135	104	153	110	100	82	0.808072	0.63854	0.962944	0.534361	0.529984	0.453503	CD274 antigen [Source:MGI Symbol;Acc:MGI:1926446]
ENSMUSG00000000440	Pparg	0.574966992	0.157892618	1	up	no	0.381160571	0.223003866	69	42	42	48	48	12	0.504222274	0.317122968	0.322136471	0.285319209	0.307669489	0.0760229	peroxisome proliferator activated receptor gamma [Source:MGI Symbol;Acc:MGI:97747]
ENSMUSG00000020893	Per1	0.573732684	9.55E-05	0.013410022	up	no	15.36544639	10.29086524	4126	4203	3304	3003	3027	3082	15.98506608	16.71179642	13.39947667	9.426483099	10.36972946	11.07638316	Period circadian protein homolog 1 [Source:UniProtKB/Swiss-Prot;Acc:O35973]
ENSMUSG00000005483	Dnajb1	0.57353817	7.11E-05	0.010340771	up	no	22.46616476	15.06371321	3267	3233	3162	2771	2433	2415	22.25040137	22.59088003	22.55721289	15.28219175	14.64964422	15.25930365	DnaJ homolog subfamily B member 1 [Source:UniProtKB/Swiss-Prot;Acc:Q9QYJ3]
ENSMUSG00000072487	Mroh5	0.573163503	0.020444786	0.580135463	up	no	0.201651342	0.102752331	81	48	78	39	40	44	0.230569879	0.139530038	0.234854109	0.091041075	0.100192158	0.117023758	_
ENSMUSG00000054453	Sytl5	0.571429283	0.175247326	1	up	no	0.649418	0.404320667	56	84	63	76	58	18	0.521755	0.809523	0.616976	0.579885	0.48071	0.152367	synaptotagmin-like 5 [Source:MGI Symbol;Acc:MGI:2668451]
ENSMUSG00000086213	A330040F15Rik	0.57136983	0.077680555	0.959452284	up	no	1.27660079	0.826421354	158	131	112	119	119	69	1.468847546	1.262086452	1.098868371	0.900050707	0.986608181	0.592605174	RIKEN cDNA A330040F15 gene [Source:MGI Symbol;Acc:MGI:3698434]
ENSMUSG00000073486	Gm10518	0.56990876	0.126727977	1	up	no	1.145485	0.739032667	49	75	77	49	49	54	0.813262	1.278567	1.344626	0.657777	0.725211	0.83411	_
ENSMUSG00000075010	AW112010	0.569741614	0.26390293	1	up	no	1.626008667	1.062876667	96	22	52	31	64	34	2.716357	0.63175	1.529919	0.709986	1.601513	0.877131	expressed sequence AW112010 [Source:MGI Symbol;Acc:MGI:2147706]
ENSMUSG00000097908	4933404O12Rik	0.569590396	0.156765298	1	up	no	2.410576116	1.591646437	498	528	512	578	535	110	2.285046387	2.48661335	2.460068612	2.143057221	2.167058625	0.464823466	RIKEN cDNA 4933404O12 gene [Source:MGI Symbol;Acc:MGI:1914002]
ENSMUSG00000037447	Arid5a	0.569460136	0.004822833	0.261121956	up	no	0.918187842	0.586125128	521	529	515	409	354	413	0.897813362	0.929168962	0.927581201	0.566785252	0.531618714	0.659971417	AT-rich interactive domain-containing protein 5A [Source:UniProtKB/Swiss-Prot;Acc:Q3U108]
ENSMUSG00000109511	Nup62	0.566520715	0.107282071	1	up	no	11.90308203	8.005000496	1550	1363	1646	1804	465	1369	11.8472761	10.68908799	13.172882	11.17468459	3.134943878	9.705373022	Nuclear pore glycoprotein p62 [Source:UniProtKB/Swiss-Prot;Acc:Q63850]
ENSMUSG00000029097	Trmt44	0.566388812	0.033081906	0.71718621	up	no	1.08164715	0.697972253	249	256	246	148	216	201	1.052013947	1.108252656	1.084674848	0.502955407	0.801855301	0.789106052	Probable tRNA (uracil-O(2)-)-methyltransferase [Source:UniProtKB/Swiss-Prot;Acc:Q9D2Q2]
ENSMUSG00000099784	Dalir	0.565832151	0.172231317	1	up	no	0.542271667	0.333896667	76	43	41	63	23	32	0.760956	0.43788	0.427979	0.507554	0.19658	0.297556	DNMT1 associated long intergenic non-coding RNA [Source:MGI Symbol;Acc:MGI:5579231]
ENSMUSG00000024529	Lox	0.565298334	0.195793371	1	up	no	0.301294796	0.171201304	113	64	20	34	78	20	0.511741683	0.297915279	0.094227426	0.121924382	0.310697846	0.080981683	Protein-lysine 6-oxidase [Source:UniProtKB/Swiss-Prot;Acc:P28301]
ENSMUSG00000021587	Pcsk1	0.564988542	0.008305235	0.369809894	up	no	5.544024783	3.715139422	1541	1350	1287	949	1498	831	5.99576382	5.391952953	5.244357575	2.992329752	5.154552898	2.998535617	Neuroendocrine convertase 1 [Source:UniProtKB/Swiss-Prot;Acc:P63239]
ENSMUSG00000026303	Mlph	0.564246891	0.051279366	0.86003753	up	no	0.346643163	0.202068509	107	63	84	76	44	53	0.426723903	0.260615752	0.352589836	0.247660236	0.15839564	0.200149651	melanophilin [Source:HGNC Symbol;Acc:HGNC:29643]
ENSMUSG00000091955	Gm9844	0.564208265	0.150767054	1	up	no	3.705493	2.473755667	78	58	105	69	59	62	3.501897	2.666931	4.947651	2.512166	2.32847	2.580631	predicted pseudogene 9844 [Source:MGI Symbol;Acc:MGI:3704288]
ENSMUSG00000079363	Gbp4	0.563743631	0.028861922	0.68738339	up	no	0.342413439	0.199312303	108	112	130	70	101	65	0.308374546	0.328024535	0.390841236	0.164932139	0.257655335	0.175349434	Mus musculus guanylate binding protein 4 (Gbp4), transcript variant 6, mRNA. [Source:RefSeq mRNA;Acc:NM_001359082]
ENSMUSG00000026077	Npas2	0.56266027	0.001642456	0.1211181	up	no	4.768488608	3.19622265	1112	978	981	867	836	719	5.062195102	4.56817364	4.675097082	3.195599563	3.361924961	3.031143427	neuronal PAS domain protein 2 [Source:HGNC Symbol;Acc:HGNC:7895]
ENSMUSG00000049734	Trex1	0.562300411	0.206804883	1	up	no	2.279383007	1.511369227	69	206	78	98	104	75	1.302105116	3.996641348	1.539402558	1.494910373	1.7346006	1.304596708	Three-prime repair exonuclease 1 [Source:UniProtKB/Swiss-Prot;Acc:Q91XB0]
ENSMUSG00000033053	1700028P14Rik	0.560542745	0.150461538	1	up	no	1.437121	0.942240333	67	50	52	53	45	33	1.66568	1.283229	1.362454	1.069265	0.998015	0.759441	RIKEN cDNA 1700028P14 gene [Source:MGI Symbol;Acc:MGI:1914733]
ENSMUSG00000049516	Spty2d1	0.560202887	0.00317637	0.188924445	up	no	4.206077431	2.820410911	1398	1344	1099	885	1135	986	4.490550703	4.430559722	3.697121868	2.301796916	3.22221589	2.937219927	SPT2 chromatin protein domain containing 1 [Source:HGNC Symbol;Acc:HGNC:26818]
ENSMUSG00000102543	Pcdhgc5	0.558915044	0.315106602	1	up	no	26.82540133	18.17729796	12504	11395	3753	16882	2790	3147	35.78039122	33.45652211	11.23929065	39.13015382	7.053530141	8.348209933	protocadherin gamma subfamily C, 5 [Source:MGI Symbol;Acc:MGI:1935205]
ENSMUSG00000050919	Zfp366	0.558514085	0.011972674	0.453764358	up	no	1.447667	0.950867667	451	436	356	355	298	306	1.539303	1.529303	1.274395	0.982905	0.900277	0.969421	zinc finger protein 366 [Source:MGI Symbol;Acc:MGI:2178429]
ENSMUSG00000049649	Gpr3	0.557997983	0.030118833	0.696702005	up	no	2.402953228	1.600116193	265	284	334	277	221	199	2.105404847	2.313575469	2.789879368	1.781785251	1.550577246	1.467986082	G-protein coupled receptor 3 [Source:UniProtKB/Swiss-Prot;Acc:P35413]
ENSMUSG00000085944	1700003D09Rik	0.557714733	0.360156594	1	up	no	0.570418667	0.355467333	42	40	26	4	63	11	0.651172	0.632404	0.42768	0.042733	0.869605	0.154064	RIKEN cDNA 1700003D09 gene [Source:MGI Symbol;Acc:MGI:1916588]
ENSMUSG00000031812	Map1lc3b	0.557689092	0.019936697	0.57637156	up	no	16.48816449	11.16982542	8685	4091	3970	4754	4204	4290	25.21477871	12.18286707	12.0668477	11.17867708	10.78297592	11.54782325	Microtubule-associated proteins 1A/1B light chain 3B [Source:UniProtKB/Swiss-Prot;Acc:Q9CQV6]
ENSMUSG00000018909	Arrb1	0.557389562	0.167656973	1	up	no	12.08943131	8.183091659	3321	11177	3621	3516	7785	3072	6.476179076	22.3947736	7.397341261	5.554636258	13.4381306	5.556508117	Beta-arrestin-1 [Source:UniProtKB/Swiss-Prot;Acc:Q8BWG8]
ENSMUSG00000032840	2410131K14Rik	0.555625802	0.000575397	0.056151193	up	no	7.070133333	4.778285333	1798	1729	1832	1471	1412	1370	6.94392	6.854247	7.412233	4.603443	4.822549	4.908864	UPF0454 [Source:UniProtKB/Swiss-Prot;Acc:Q8BTG6]
ENSMUSG00000078879	Zfp973	0.555228239	0.578464109	1	up	no	0.661311879	0.418110331	105	142	0	51	3	123	0.830471498	1.15346414	0	0.328614527	0.014753553	0.910962914	zinc finger protein 973 [Source:MGI Symbol;Acc:MGI:3615331]
ENSMUSG00000083695	Rnf138rt1	0.553771121	0.272379583	1	up	no	0.801560333	0.514176333	20	56	52	56	24	20	0.366041	1.050803	0.987837	0.820252	0.388195	0.334082	ring finger protein 138, retrogene 1 [Source:MGI Symbol;Acc:MGI:1921514]
ENSMUSG00000029298	Gbp9	0.553124039	0.029882377	0.694377057	up	no	0.947589332	0.613976866	244	194	223	164	180	157	1.026285424	0.835647859	0.980834714	0.55789363	0.670394628	0.61364234	_
ENSMUSG00000072845	Tmprss11a	0.552685247	0.244347154	1	up	no	0.165471823	0.080985422	36	60	32	12	62	0	0.135607887	0.234302303	0.126505279	0.036588494	0.206367772	0	Transmembrane protease serine 11A [Source:UniProtKB/Swiss-Prot;Acc:Q3UQ41]
ENSMUSG00000056738	A730036I17Rik	0.552506294	0.100737576	1	up	no	0.291255571	0.166771584	58	51	34	48	30	20	0.346391444	0.313242515	0.214132754	0.232560851	0.155938807	0.111815094	RIKEN cDNA A730036I17 gene [Source:MGI Symbol;Acc:MGI:3041182]
ENSMUSG00000040364	Sec1	0.552396934	0.118830775	1	up	no	0.893863667	0.577702	142	74	83	77	93	57	1.254233	0.663436	0.763922	0.547928	0.720267	0.464911	secretory blood group 1 [Source:MGI Symbol;Acc:MGI:1928893]
ENSMUSG00000048905	4930539E08Rik	0.551525299	0.04783485	0.842150236	up	no	1.076823345	0.702944664	275	174	226	158	168	189	1.28561113	0.837015984	1.107842921	0.598640283	0.692705838	0.817487872	Uncharacterized [Source:UniProtKB/Swiss-Prot;Acc:Q8CC96]
ENSMUSG00000027259	Adal	0.551278403	0.013989677	0.49997756	up	no	2.068795037	1.380018608	547	478	462	403	454	316	2.236784701	1.997112697	1.972487714	1.323375805	1.629314047	1.18736597	Adenosine deaminase-like protein [Source:UniProtKB/Swiss-Prot;Acc:Q80SY6]
ENSMUSG00000028655	Mfsd2a	0.550314109	0.001386745	0.107618036	up	no	14.89293321	10.13824581	1414	1559	1524	1198	1309	1090	13.70003571	15.50298428	15.47577966	9.403154669	11.22379103	9.787791744	Sodium-dependent lysophosphatidylcholine symporter 1 [Source:UniProtKB/Swiss-Prot;Acc:Q9DA75]
ENSMUSG00000035429	Ptprh	0.549916704	0.084545381	0.979786452	up	no	0.199626889	0.104663013	24	47	42	31	28	13	0.120472176	0.250048047	0.228360446	0.128152226	0.127812715	0.058024097	Receptor-type tyrosine-protein phosphatase H [Source:UniProtKB/Swiss-Prot;Acc:E9Q0N2]
ENSMUSG00000063268	Parp10	0.548962632	0.078519736	0.96213243	up	no	0.625445778	0.395850481	109	142	112	81	122	67	0.550105229	0.739772214	0.58645989	0.331854487	0.542996255	0.312700701	poly (ADP-ribose) polymerase family, member 10 [Source:MGI Symbol;Acc:MGI:3712326]
ENSMUSG00000089756	Zfp966	0.5489012	0.43322914	1	up	no	0.54363205	0.339948596	78	80	61	50	113	0	0.569738134	0.598596989	0.462561026	0.294553111	0.725292676	0	zinc finger protein 966 [Source:MGI Symbol;Acc:MGI:3709288]
ENSMUSG00000027078	Ube2l6	0.548389723	0.04844749	0.844931307	up	no	2.959541133	1.992061949	337	223	238	195	239	194	3.672145408	2.496888795	2.709589195	1.720811385	2.299320038	1.956054424	ubiquitin-conjugating enzyme E2L 6 [Source:MGI Symbol;Acc:MGI:1914500]
ENSMUSG00000035356	Nfkbiz	0.548243505	0.052724147	0.866448449	up	no	1.067530039	0.698418008	263	246	213	160	153	236	1.141190801	1.095030187	0.966369131	0.560513168	0.587435202	0.947305652	NF-kappa-B inhibitor zeta [Source:UniProtKB/Swiss-Prot;Acc:Q9EST8]
ENSMUSG00000031273	Col4a6	0.54609642	0.053292385	0.872668435	up	no	0.2402918	0.133055889	125	74	62	63	75	32	0.340052746	0.207417934	0.173404719	0.139700553	0.179192492	0.080274621	collagen, type IV, alpha 6 [Source:MGI Symbol;Acc:MGI:2152695]
ENSMUSG00000101800	Rnf170-ps	0.545209883	0.157973649	1	up	no	1.901416333	1.271554	61	70	89	80	53	42	1.539314	1.810303	2.354632	1.64348	1.184438	0.986744	ring finger protein 170, pseudogene [Source:MGI Symbol;Acc:MGI:3645710]
ENSMUSG00000063275	Hacd1	0.545177869	0.071022307	0.94227397	up	no	3.198132806	2.160233189	200	345	365	265	193	265	2.048829653	3.626368176	3.919200588	2.207839412	1.749855244	2.52300491	3-hydroxyacyl-CoA dehydratase 1 [Source:HGNC Symbol;Acc:HGNC:9639]
ENSMUSG00000039103	Nexn	0.544796507	0.095708421	1	up	no	0.247676212	0.1383279	31	41	59	46	21	20	0.167843801	0.233524054	0.341660779	0.210357235	0.099359944	0.105266522	Nexilin [Source:UniProtKB/Swiss-Prot;Acc:Q7TPW1]
ENSMUSG00000060534	Dcc	0.544697238	0.013281124	0.481375686	up	no	2.650952473	1.785874899	1074	941	861	554	907	790	2.90366338	2.61070965	2.438484389	1.212228247	2.166485811	1.97891064	Netrin receptor DCC [Source:UniProtKB/Swiss-Prot;Acc:P70211]
ENSMUSG00000024371	C2	0.544552823	0.156372428	1	up	no	0.474803647	0.29408761	110	68	76	43	110	32	0.603594321	0.382023752	0.438792867	0.183804005	0.535522957	0.162935866	Complement C2 Complement C2b fragment Complement C2a fragment [Source:UniProtKB/Swiss-Prot;Acc:P21180]
ENSMUSG00000091223	Gm8775	0.544502083	0.16993028	1	up	no	0.940193333	0.613185667	41	64	64	57	36	38	0.664981	1.066877	1.088722	0.74729	0.521161	0.571106	predicted gene 8775 [Source:MGI Symbol;Acc:MGI:3646219]
ENSMUSG00000039835	Nhsl1	0.54442476	0.002255121	0.149397162	up	no	3.417798571	2.312030444	1721	1703	1783	1661	1470	1043	3.308249473	3.357438024	3.587708217	2.584832918	2.493153449	1.858104964	NHS-like protein 1 [Source:UniProtKB/Swiss-Prot;Acc:Q8CAF4]
ENSMUSG00000005968	Tuft1	0.542891404	0.102502395	1	up	no	1.44098388	0.957721905	229	136	243	195	188	98	1.590639103	0.963183748	1.769128788	1.093471087	1.15310539	0.626589238	tuftelin 1 [Source:MGI Symbol;Acc:MGI:109572]
ENSMUSG00000039714	Cplx3	0.541675197	0.168518881	1	up	no	2.200418582	1.480324907	526	194	163	159	305	219	3.886702549	1.464772295	1.249780903	0.947923573	1.992583584	1.500467563	Complexin-3 [Source:UniProtKB/Swiss-Prot;Acc:Q8R1B5]
ENSMUSG00000028584	Lrrc38	0.541523238	0.186793874	1	up	no	0.537170667	0.337765	67	68	34	44	24	56	0.628258	0.652096	0.331158	0.327444	0.199052	0.486799	Leucine-rich repeat-containing protein 38 [Source:UniProtKB/Swiss-Prot;Acc:A2VDH3]
ENSMUSG00000031609	Sap30	0.541297584	0.034258005	0.725068441	up	no	7.104902333	4.850867333	400	402	324	378	250	280	7.40606	7.63173	6.276917	5.660643	4.086195	4.805764	Histone deacetylase complex subunit SAP30 [Source:UniProtKB/Swiss-Prot;Acc:O88574]
ENSMUSG00000020836	Coro6	0.541268464	0.07671647	0.958892195	up	no	2.103104812	1.413899745	263	408	186	268	195	214	1.895140672	3.011234331	1.402939434	1.564643278	1.243492747	1.43356321	Coronin-6 [Source:UniProtKB/Swiss-Prot;Acc:Q920M5]
ENSMUSG00000026773	Pfkfb3	0.541247182	0.00841772	0.370766434	up	no	5.996966641	4.089692816	2188	1959	1961	1948	1146	1803	6.294275903	5.785857915	5.910766104	4.544789442	2.904220447	4.820068557	6-phosphofructo-2-kinase/fructose-2,6-biphosphatase 3 [Source:HGNC Symbol;Acc:HGNC:8874]
ENSMUSG00000103789	Gm10129	0.54096774	0.240961058	1	up	no	0.690712888	0.44346465	58	19	47	20	33	39	0.949780122	0.321941216	0.800417325	0.258051064	0.481181581	0.591161307	_
ENSMUSG00000004931	Apba3	0.538958844	0.048701989	0.845090228	up	no	3.940697933	2.681080801	602	387	553	503	294	442	4.519359898	2.959363124	4.343370778	3.049309257	1.931781002	3.062152144	Amyloid-beta A4 protein-binding family A member 3 [Source:UniProtKB/Swiss-Prot;Acc:O88888]
ENSMUSG00000029072	Tas1r3	0.538497456	0.175722802	1	up	no	0.240814667	0.134646667	57	36	24	52	12	14	0.347377	0.222804	0.152263	0.260617	0.063099	0.080224	Taste receptor type 1 member 3 [Source:UniProtKB/Swiss-Prot;Acc:Q925D8]
ENSMUSG00000028871	Rspo1	0.536667513	0.287913052	1	up	no	0.480204593	0.299970668	52	56	21	28	59	6	0.573830214	0.628514314	0.238269251	0.255084038	0.582148318	0.062679647	R-spondin 1 [Source:MGI Symbol;Acc:MGI:2183426]
ENSMUSG00000052407	Ccdc171	0.536542007	0.075859633	0.956639484	up	no	0.338330095	0.202194149	106	80	90	84	79	32	0.38272663	0.290702715	0.341560939	0.24726006	0.2518229	0.107499487	Coiled-coil domain-containing protein 171 [Source:UniProtKB/Swiss-Prot;Acc:E9Q1U1]
ENSMUSG00000036553	Sh3tc1	0.535354101	0.103366228	1	up	no	0.438818078	0.27177871	96	140	106	112	46	92	0.357362296	0.54209393	0.416998007	0.343476637	0.150331453	0.321528038	SH3 domain and tetratricopeptide repeats 1 [Source:MGI Symbol;Acc:MGI:2678949]
ENSMUSG00000025958	Creb1	0.53530827	0.126480113	1	up	no	2.792795591	1.89606142	1273	2039	1833	1757	541	1817	2.018261109	3.317274055	3.042851608	2.258170398	0.757770236	2.672243626	Cyclic AMP-responsive element-binding protein 1 [Source:UniProtKB/Swiss-Prot;Acc:Q01147]
ENSMUSG00000038457	Tmem255b	0.534725552	0.249563878	1	up	no	1.6234051	1.089649272	179	44	128	82	129	66	2.437538956	0.610699724	1.821976619	0.904222853	1.548062235	0.816662727	transmembrane protein 255B [Source:MGI Symbol;Acc:MGI:2685533]
ENSMUSG00000041272	Tox	0.53196293	0.014840532	0.51568476	up	no	1.622860778	1.091553059	562	495	604	415	530	367	1.608721144	1.45136919	1.808492001	0.962677829	1.33906823	0.972913117	Thymocyte selection-associated high mobility group box protein TOX [Source:UniProtKB/Swiss-Prot;Acc:Q66JW3]
ENSMUSG00000110723	AC153912.1	0.531910186	0.053333605	0.872668435	up	no	7.134570667	4.903706667	242	228	225	198	183	180	7.275874	7.023903	7.103935	4.826383	4.861254	5.023483	_
ENSMUSG00000070780	Rbm47	0.531751453	0.32502306	1	up	no	0.680916597	0.440171312	230	221	208	211	287	14	0.696880484	0.689667085	0.656202223	0.516967069	0.76499507	0.038551797	RNA-binding protein 47 [Source:UniProtKB/Swiss-Prot;Acc:Q91WT8]
ENSMUSG00000003949	Hlf	0.531621022	0.036993071	0.749314686	up	no	17.43957757	12.03347656	6500	3372	5789	3363	3573	5575	21.22624311	11.29558572	19.79690389	8.897961997	10.3142184	16.88824928	Hepatic leukemia factor [Source:UniProtKB/Swiss-Prot;Acc:Q8BW74]
ENSMUSG00000033730	Egr3	0.531535757	0.001721088	0.123938165	up	no	22.80531054	15.74630379	4010	4872	4591	3349	3319	4197	19.85518002	24.75266871	23.8080829	13.4313019	14.52785862	19.27975085	Mus musculus early growth response 3 (Egr3), transcript variant 3, mRNA. [Source:RefSeq mRNA;Acc:NM_001289927]
ENSMUSG00000087034	Cbfa2t2-ps1	0.53132431	0.191741133	1	up	no	2.588934	1.760525333	107	80	68	45	97	60	3.193298	2.447027	2.126477	1.089264	2.550113	1.642199	core-binding factor, runt domain, alpha subunit 2; translocated to, (human), pseudogene 1 [Source:MGI Symbol;Acc:MGI:1333788]
ENSMUSG00000039236	Isg20	0.531099182	0.210568716	1	up	no	0.610762051	0.39186673	77	50	28	50	28	40	0.889802602	0.598358665	0.344124887	0.453235712	0.28799266	0.434371817	Interferon-stimulated 20 kDa protein [Source:UniProtKB/Swiss-Prot;Acc:Q9JL16]
ENSMUSG00000029213	Commd8	0.530566148	0.0025659	0.165282484	up	no	8.396538122	5.782009006	1509	1598	1524	1441	1091	1225	8.011293189	8.70400307	8.474318107	6.193708383	5.120403972	6.031914663	Mus musculus COMM domain containing 8 (Commd8), transcript variant 2, mRNA. [Source:RefSeq mRNA;Acc:NM_001356611]
ENSMUSG00000034570	Inpp5j	0.529282762	0.00210099	0.143262931	up	no	11.19938003	7.729330528	2666	2818	2184	2382	1744	2095	11.42175711	12.38375319	9.792629788	8.26535025	6.599114124	8.323527209	Phosphatidylinositol 4,5-bisphosphate 5-phosphatase A [Source:UniProtKB/Swiss-Prot;Acc:P59644]
ENSMUSG00000040734	Ppp1r13l	0.52906955	0.07651985	0.958892195	up	no	1.073961559	0.71355716	209	183	133	154	157	102	1.262475755	1.125477916	0.833931006	0.745961529	0.831579309	0.563130643	protein phosphatase 1, regulatory (inhibitor) subunit 13 like [Source:MGI Symbol;Acc:MGI:3525053]
ENSMUSG00000025402	Nab2	0.528354539	0.002726251	0.170228775	up	no	16.16650653	11.17830221	2154	2269	1965	1525	1732	1891	15.97279634	17.26530753	15.26141573	9.164800266	11.35710411	13.01300225	NGFI-A-binding protein 2 [Source:UniProtKB/Swiss-Prot;Acc:Q61127]
ENSMUSG00000052821	Cysltr1	0.528229694	0.120989782	1	up	no	0.171934667	0.088560879	40	54	26	17	48	8	0.168944	0.233981	0.112879	0.054205636	0.179979	0.031498	Cysteinyl leukotriene receptor 1 [Source:UniProtKB/Swiss-Prot;Acc:Q99JA4]
ENSMUSG00000096953	Gm26571	0.527626175	0.099565537	1	up	no	3.501055233	2.398034761	250	184	196	226	125	161	4.076612153	3.091369273	3.335184273	2.98571827	1.790791572	2.417594439	predicted gene, 26571 [Source:MGI Symbol;Acc:MGI:5477065]
ENSMUSG00000104950	4833413G10Rik	0.526787118	0.093071646	1	up	no	1.479236333	0.996146	126	141	120	95	98	112	1.408464	1.62214	1.407105	0.855291	0.969379	1.163768	RIKEN cDNA 4833413G10 gene [Source:MGI Symbol;Acc:MGI:1921834]
ENSMUSG00000028654	Mycl	0.526128028	0.019620333	0.57637156	up	no	10.86919495	7.517183833	2126	2026	1749	1365	1266	2105	11.48322263	11.22995391	9.894408297	5.962648724	6.03809311	10.55080967	Protein L-Myc [Source:UniProtKB/Swiss-Prot;Acc:P10166]
ENSMUSG00000005089	Slc1a2	0.525648774	0.109843838	1	up	no	174.4745853	121.1676526	105488	106858	95305	107198	33195	110553	175.3134704	182.2246197	165.8856658	144.3142735	48.76786763	170.4208167	solute carrier family 1 (glial high affinity glutamate transporter), member 2 [Source:MGI Symbol;Acc:MGI:101931]
ENSMUSG00000039219	Arid4b	0.525509143	0.001217002	0.098963803	up	no	2.450170146	1.671638633	1919	1820	1853	1781	1404	1323	2.462491934	2.398711258	2.489307247	1.852039073	1.589817758	1.573059069	AT-rich interactive domain-containing protein 4B [Source:UniProtKB/Swiss-Prot;Acc:A2CG63]
ENSMUSG00000061894	Zscan20	0.524607454	0.031809217	0.705299052	up	no	0.851173218	0.561206378	381	288	297	339	220	193	0.984378892	0.762412618	0.806728145	0.712940903	0.505155581	0.465522649	zinc finger and SCAN domains 20 [Source:MGI Symbol;Acc:MGI:2679268]
ENSMUSG00000023284	Zfp605	0.524526075	0.082018768	0.968371979	up	no	1.914711182	1.300601912	200	278	420	268	261	196	1.231555825	1.773252807	2.739324914	1.348570783	1.429429284	1.123805669	zinc finger protein 605 [Source:MGI Symbol;Acc:MGI:2444933]
ENSMUSG00000026162	Nhej1	0.524407182	0.221683979	1	up	no	0.917643977	0.607511616	53	61	26	40	43	26	1.017024698	1.207557419	0.528349814	0.624994116	0.727438395	0.470102337	non-homologous end-joining factor 1 [Source:RefSeq peptide;Acc:NP_083618]
ENSMUSG00000037872	Ackr1	0.524333077	0.490650615	1	up	no	12.73013273	8.820540415	1218	1106	104	140	341	1392	18.89687114	17.60900514	1.684521903	1.751169332	4.674176312	20.0362756	atypical chemokine receptor 1 (Duffy blood group) [Source:MGI Symbol;Acc:MGI:1097689]
ENSMUSG00000105604	Gm42838	0.523160034	0.177173551	1	up	no	5.939003333	4.102216333	163	100	90	80	86	116	8.065108	5.072866	4.679036	3.213326	3.777321	5.316002	predicted gene 42838 [Source:MGI Symbol;Acc:MGI:5662975]
ENSMUSG00000006586	Runx1t1	0.522658196	0.036078694	0.747356616	up	no	1.859203515	1.26377824	811	699	491	733	454	422	2.217513379	1.957334253	1.402762912	1.624908522	1.098668872	1.067757327	runt-related transcription factor 1; translocated to, 1 (cyclin D-related) [Source:MGI Symbol;Acc:MGI:104793]
ENSMUSG00000041189	Chrnb1	0.522651005	0.134798641	1	up	no	0.527943274	0.337106016	86	47	51	48	42	47	0.728508984	0.398835446	0.456485394	0.323934351	0.314977388	0.372406308	cholinergic receptor, nicotinic, beta polypeptide 1 (muscle) [Source:MGI Symbol;Acc:MGI:87890]
ENSMUSG00000057729	Prtn3	0.522188834	0.217843228	1	up	no	0.596390559	0.38490691	46	68	29	41	42	29	0.552989985	0.857813895	0.378367798	0.400164942	0.433510375	0.321045411	proteinase 3 [Source:MGI Symbol;Acc:MGI:893580]
ENSMUSG00000029798	Herc6	0.522042238	0.052337916	0.863528249	up	no	0.461070984	0.290721614	201	154	226	155	185	96	0.470721218	0.364509589	0.547982145	0.288168104	0.377020278	0.206976461	E3 ISG15--protein ligase Herc6 [Source:UniProtKB/Swiss-Prot;Acc:F2Z461]
ENSMUSG00000004031	Brinp2	0.520777559	0.050890437	0.85946042	up	no	5.776374337	3.995809859	1888	3455	1461	1856	1568	2080	4.698234391	8.823562917	3.807325703	3.739203435	3.447116849	4.801109293	BMP/retinoic acid-inducible neural-specific protein 2 [Source:UniProtKB/Swiss-Prot;Acc:Q6DFY8]
ENSMUSG00000089876	Tmem102	0.520606463	0.170985904	1	up	no	0.823723	0.543907667	89	73	54	70	69	30	0.997283	0.843637	0.630249	0.639581	0.686454	0.305688	Transmembrane protein 102 [Source:UniProtKB/Swiss-Prot;Acc:Q3UPR7]
ENSMUSG00000022768	Ccdc116	0.520251245	0.0876323	0.993836883	up	no	0.401224479	0.249478967	88	68	58	53	51	52	0.488027416	0.383014173	0.332631846	0.234963721	0.245935631	0.267537548	Coiled-coil domain-containing protein 116 [Source:UniProtKB/Swiss-Prot;Acc:Q80X53]
ENSMUSG00000020387	Jade2	0.519924983	0.000389809	0.04292377	up	no	6.31011556	4.370466487	2940	3053	3116	2513	2443	2450	5.96192003	6.350797743	6.617628909	4.126910359	4.377776116	4.606712988	Mus musculus jade family PHD finger 2 (Jade2), transcript variant 1, mRNA. [Source:RefSeq mRNA;Acc:NM_001357588]
ENSMUSG00000000317	Bcl6b	0.519833019	0.088949716	1	up	no	0.574311715	0.370300427	105	105	79	80	86	53	0.611101356	0.630878365	0.480955423	0.379445677	0.445111187	0.286344416	B-cell CLL/lymphoma 6 member B protein [Source:UniProtKB/Swiss-Prot;Acc:O88282]
ENSMUSG00000101711	Gm28306	0.51907217	0.223284679	1	up	no	2.232035333	1.527342	66	48	46	50	49	32	2.706548	2.023587	1.965971	1.637776	1.751643	1.192607	predicted gene 28306 [Source:MGI Symbol;Acc:MGI:5579012]
ENSMUSG00000001768	Rin2	0.518932918	0.003047809	0.184647381	up	no	6.606718814	4.580537449	1565	1727	1498	1395	1468	1055	6.31864184	7.163390327	6.338124274	4.561749469	5.234463167	3.945399711	Ras and Rab interactor 2 [Source:MGI Symbol;Acc:MGI:1921280]
ENSMUSG00000027315	Spint1	0.518585111	0.174883944	1	up	no	0.824594381	0.545418747	140	87	87	124	80	45	1.085272112	0.686660489	0.701850542	0.773619063	0.545699535	0.316937644	Kunitz-type protease inhibitor 1 [Source:UniProtKB/Swiss-Prot;Acc:Q9R097]
ENSMUSG00000094083	Gm1604a	0.518245322	0.204930444	1	up	no	1.488148667	1.008878	45	57	55	39	43	44	1.246981	1.627821	1.589644	0.861874	1.049398	1.115362	_
ENSMUSG00000058152	Chsy3	0.518135925	0.048090135	0.842714983	up	no	2.059134	1.407666	249	286	276	182	231	233	1.847823	2.184461	2.145118	1.094747	1.519568	1.608683	Chondroitin sulfate synthase 3 [Source:UniProtKB/Swiss-Prot;Acc:Q5DTK1]
ENSMUSG00000030790	Adm	0.517278906	0.17233801	1	up	no	0.74634976	0.49133476	68	57	41	50	32	45	0.909205265	0.76618683	0.563657185	0.544000455	0.380285627	0.549718199	ADM Adrenomedullin Proadrenomedullin N-20 terminal peptide [Source:UniProtKB/Swiss-Prot;Acc:P97297]
ENSMUSG00000037408	Cnnm4	0.517238534	0.009985476	0.408877646	up	no	4.101421184	2.835566393	927	784	949	684	662	803	4.186095141	3.628514296	4.489654116	2.503448022	2.640431463	3.362819693	Metal transporter CNNM4 [Source:UniProtKB/Swiss-Prot;Acc:Q69ZF7]
ENSMUSG00000024456	Diaph1	0.515891588	0.043802085	0.806601778	up	no	9.55539957	6.652605972	2825	2447	2860	1605	1728	3206	9.719258546	8.639720157	10.30722001	4.469215583	5.25388272	10.23471961	1 [Source:UniProtKB/Swiss-Prot;Acc:O08808]
ENSMUSG00000026117	Zap70	0.515757575	0.094876507	1	up	no	1.569753676	1.0678684	221	163	251	219	129	164	1.604081211	1.203509949	1.901669868	1.283967616	0.827325715	1.09231187	zeta-chain (TCR) associated protein kinase [Source:MGI Symbol;Acc:MGI:99613]
ENSMUSG00000034000	Neu4	0.515296521	0.028583194	0.682416538	up	no	2.656713689	1.8287323	446	648	559	503	491	352	2.094411745	3.122443177	2.753286146	1.914010903	2.037303398	1.534882599	Sialidase-4 [Source:UniProtKB/Swiss-Prot;Acc:Q8BZL1]
ENSMUSG00000032387	Rbpms2	0.515016521	0.185788731	1	up	no	1.068246026	0.717520951	98	128	138	91	151	47	0.842647605	1.127866647	1.234223825	0.632729676	1.1487458	0.371087377	RNA binding protein with multiple splicing 2 [Source:MGI Symbol;Acc:MGI:1919223]
ENSMUSG00000116029	AC124490.1	0.51499468	0.218778844	1	up	no	1.438488	0.976627	54	39	46	39	35	37	1.641777	1.211523	1.462164	0.950942	0.927312	1.051627	_
ENSMUSG00000052372	Il1rapl1	0.514867405	0.016104815	0.530222569	up	no	1.086706936	0.730525455	495	411	460	373	418	290	1.154525639	0.98324458	1.122350587	0.702649953	0.862185827	0.626740585	interleukin 1 receptor accessory protein like 1 [Source:HGNC Symbol;Acc:HGNC:5996]
ENSMUSG00000019970	Sgk1	0.514688042	0.000457003	0.049651895	up	no	19.5015684	13.62000544	4161	4750	3933	3689	3891	2977	18.50861513	21.6754042	18.32068588	13.28932216	15.30089705	12.26979709	Serine/threonine-protein kinase Sgk1 [Source:UniProtKB/Swiss-Prot;Acc:Q9WVC6]
ENSMUSG00000040033	Stat2	0.514015465	0.014423683	0.503346393	up	no	2.368819953	1.628842163	572	674	645	513	486	528	2.091474486	2.532798478	2.482186896	1.520500894	1.571112706	1.794912889	signal transducer and activator of transcription 2 [Source:MGI Symbol;Acc:MGI:103039]
ENSMUSG00000103378	Gm37176	0.513445012	0.261228579	1	up	no	0.266873	0.157012	75	38	35	5	43	51	0.401084	0.206696	0.192839	0.017458	0.200696	0.252882	predicted gene, 37176 [Source:MGI Symbol;Acc:MGI:5610404]
ENSMUSG00000038507	Parp12	0.513403799	0.025591826	0.647624195	up	no	2.860977191	1.974364725	579	452	508	456	480	316	3.15834198	2.528681307	2.895908287	2.014271069	2.314653665	1.594169442	Poly [ADP-ribose] polymerase 12 [Source:UniProtKB/Swiss-Prot;Acc:Q8BZ20]
ENSMUSG00000102861	Gm37637	0.513311608	0.203190347	1	up	no	0.763784333	0.505178	42	37	51	37	40	25	0.715513	0.648589	0.927251	0.517096	0.609002	0.389436	predicted gene, 37637 [Source:MGI Symbol;Acc:MGI:5610865]
ENSMUSG00000098573	Gm27232	0.512374023	0.155999673	1	up	no	4.372485333	3.035515667	91	141	119	81	108	96	3.322664	5.255109	4.539683	2.383233	3.490102	3.233212	predicted gene 27232 [Source:MGI Symbol;Acc:MGI:5521075]
ENSMUSG00000074207	Adh1	0.51218708	0.414396344	1	up	no	0.877607587	0.585458062	124	81	63	102	107	4	1.201372319	0.79756117	0.633889272	0.800661706	0.920602039	0.035110442	Alcohol dehydrogenase 1 [Source:UniProtKB/Swiss-Prot;Acc:P00329]
ENSMUSG00000106067	Gm7902	0.511562801	0.120788536	1	up	no	3.203751	2.217456333	139	126	143	142	115	79	3.195279	2.972773	3.443201	2.650308	2.323983	1.678078	predicted gene 7902 [Source:MGI Symbol;Acc:MGI:3645041]
ENSMUSG00000091515	Zfp422-ps	0.511555898	0.096326843	1	up	no	6.523075333	4.545859	246	199	176	173	138	194	7.580245	6.299305	5.689676	4.312167	3.765247	5.560163	zinc finger protein 422, pseudogene [Source:MGI Symbol;Acc:MGI:3028594]
ENSMUSG00000086360	Gm16214	0.511512532	0.155333487	1	up	no	1.877857667	1.287440667	82	121	147	84	109	89	1.279644	1.94434	2.409589	1.057833	1.513894	1.290595	predicted gene 16214 [Source:MGI Symbol;Acc:MGI:3801724]
ENSMUSG00000054146	Krt15	0.511255351	0.186536898	1	up	no	0.799813816	0.531319874	64	70	58	65	62	24	0.778865166	0.875403848	0.745172435	0.647727395	0.674152656	0.272079572	keratin 15 [Source:HGNC Symbol;Acc:HGNC:6421]
ENSMUSG00000098760	Gm2164	0.510733229	0.281075095	1	up	no	4.700977333	3.269641	48	119	100	41	83	92	2.440077	6.284348	5.378507	1.708028	3.750651	4.350244	predicted gene 2164 [Source:MGI Symbol;Acc:MGI:3780334]
ENSMUSG00000024222	Fkbp5	0.51061558	0.000212173	0.025998427	up	no	15.58124098	10.90702171	4629	4465	4220	3830	3448	3655	15.87536535	15.71066571	15.15769188	10.64001485	10.45302253	11.62802776	Peptidyl-prolyl cis-trans isomerase FKBP5 [Source:UniProtKB/Swiss-Prot;Acc:Q64378]
ENSMUSG00000027601	Mtfr1	0.51056152	0.061049555	0.9036554	up	no	1.719496348	1.17719396	431	306	283	345	297	184	2.140794272	1.554877949	1.462816824	1.386271389	1.301057935	0.844252556	mitochondrial fission regulator 1 [Source:MGI Symbol;Acc:MGI:1914722]
ENSMUSG00000089768	Tmsb15b1	0.510560826	0.327741226	1	up	no	2.415774	1.665946333	37	64	43	68	34	18	1.830284	3.214744	2.202294	2.703931	1.479598	0.81431	_
ENSMUSG00000078870	Gm14410	0.510483381	0.081993854	0.968371979	up	no	6.578643309	4.58832208	421	729	958	705	606	441	3.817749077	6.79447193	9.12370892	5.188943072	4.869619246	3.706403923	_
ENSMUSG00000092354	Gm20548	0.510237098	0.165598733	1	up	no	2.062477831	1.418290912	242	128	89	123	129	116	3.220520343	1.73566874	1.231244411	1.31667836	1.506668959	1.431525417	predicted gene 20548 [Source:MGI Symbol;Acc:MGI:5142013]
ENSMUSG00000036022	Fam122b	0.509706708	0.061275752	0.904712486	up	no	1.009873299	0.679536393	225	164	213	168	179	130	1.105818223	0.829912944	1.093888729	0.671482921	0.777278006	0.589848252	Protein FAM122B [Source:UniProtKB/Swiss-Prot;Acc:Q6NZE7]
ENSMUSG00000034165	Ccnd3	0.508788308	0.082375825	0.969999144	up	no	3.238995436	2.246687626	800	1517	1496	664	1450	971	1.975402901	3.859835734	3.881747672	1.3282962	3.179855585	2.231911093	G1/S-specific cyclin-D3 [Source:UniProtKB/Swiss-Prot;Acc:P30282]
ENSMUSG00000068696	Gpr88	0.508515022	0.276818505	1	up	no	1.837949295	1.262272956	459	140	273	92	429	169	2.847782771	0.889460906	1.776604209	0.457089062	2.3569733	0.972756507	Probable G-protein coupled receptor 88 [Source:UniProtKB/Swiss-Prot;Acc:Q9EPB7]
ENSMUSG00000018476	Kdm6b	0.508267751	0.003067805	0.185170459	up	no	6.326323342	4.418130123	1991	2253	1668	1729	1695	1430	6.248325361	7.251520927	5.479123737	4.394899104	4.700528471	4.158962795	Lysine-specific demethylase 6B [Source:UniProtKB/Swiss-Prot;Acc:Q5NCY0]
ENSMUSG00000035378	Shq1	0.508262654	0.110551339	1	up	no	0.927569419	0.622451781	247	341	287	289	117	285	0.763826981	1.086150652	0.932730623	0.725392996	0.321717992	0.820244356	SHQ1, H/ACA ribonucleoprotein assembly factor [Source:HGNC Symbol;Acc:HGNC:25543]
ENSMUSG00000021835	Bmp4	0.508197305	0.108215401	1	up	no	1.893540659	1.301659308	150	225	198	167	196	103	1.442991909	2.235395437	2.002234631	1.311892471	1.67250956	0.920575892	Bone morphotic protein 4 [Source:UniProtKB/Swiss-Prot;Acc:P21275]
ENSMUSG00000053080	2700081O15Rik	0.508169361	0.018114894	0.557015886	up	no	6.881452875	4.808757643	2995	1866	1670	1791	1581	1946	9.28617047	5.938011229	5.420176925	4.497113262	4.334462885	5.594696781	Uncharacterized [Source:UniProtKB/Swiss-Prot;Acc:Q4VA45]
ENSMUSG00000102774	Gm9748	0.508001904	0.050342116	0.855709266	up	no	9.818331333	6.874527667	380	392	264	315	286	251	10.568642	11.198524	7.687828	7.096014	7.039429	6.48814	_
ENSMUSG00000017631	Abr	0.507722801	0.00503426	0.268115454	up	no	64.1544964	45.09222577	28225	28298	27262	31643	17840	20388	63.30224199	65.12450811	64.03673909	57.49499076	35.36856331	42.41312325	active BCR-related gene [Source:MGI Symbol;Acc:MGI:107771]
ENSMUSG00000022032	Scara5	0.507447879	0.348620403	1	up	no	0.760237565	0.505147677	154	259	208	179	298	16	0.550009822	0.95147891	0.779223962	0.519115467	0.943207828	0.053119736	Scavenger receptor class A member 5 [Source:UniProtKB/Swiss-Prot;Acc:Q8K299]
ENSMUSG00000021962	Dcp1a	0.506965224	0.007287878	0.344599965	up	no	2.944381751	2.042334939	1025	1101	1130	1045	749	869	2.713040716	2.988181471	3.131923066	2.239655761	1.752313899	2.135035156	mRNA-decapping enzyme 1A [Source:UniProtKB/Swiss-Prot;Acc:Q91YD3]
ENSMUSG00000028776	Tinagl1	0.506937538	0.023849265	0.63198612	up	no	3.868543171	2.692721986	753	846	672	600	796	465	3.761606071	4.333250425	3.510773016	2.416281879	3.509847471	2.152036609	Tubulointerstitial nephritis antigen-like [Source:UniProtKB/Swiss-Prot;Acc:Q99JR5]
ENSMUSG00000045319	Proser2	0.50504414	0.049092144	0.847873808	up	no	0.288483487	0.173740545	108	137	126	92	71	101	0.24534567	0.319133306	0.300971485	0.16790217	0.141273596	0.21204587	Proline and serine-rich protein 2 [Source:UniProtKB/Swiss-Prot;Acc:Q8C5R2]
ENSMUSG00000106943	Dancr	0.504940991	0.45891028	1	up	no	0.342706078	0.211970192	37	71	3	64	14	7	0.333616511	0.672897263	0.02160446	0.477953392	0.108620151	0.049337034	_
ENSMUSG00000022014	Epsti1	0.504531015	0.312784924	1	up	no	0.376239252	0.23569604	22	46	51	7	43	38	0.198990237	0.432808657	0.496918863	0.045706635	0.35006693	0.311314555	epithelial stromal interaction 1 [Source:HGNC Symbol;Acc:HGNC:16465]
ENSMUSG00000037112	Sik2	0.504023236	0.010186877	0.413102518	up	no	2.871436272	1.995271511	1236	1276	1175	797	1162	1026	2.821070549	2.987583905	2.805654362	1.471875537	2.343476853	2.170462143	salt inducible kinase 2 [Source:HGNC Symbol;Acc:HGNC:21680]
ENSMUSG00000021906	Oxnad1	0.503940849	0.020758088	0.583266494	up	no	1.810675098	1.247365838	432	522	503	400	402	380	1.568238085	1.947572576	1.916214632	1.176654123	1.288847323	1.276596068	Oxidoreductase NAD-binding domain-containing protein 1 [Source:UniProtKB/Swiss-Prot;Acc:Q8VE38]
ENSMUSG00000015134	Aldh1a3	0.503698568	0.074600277	0.954286281	up	no	0.199922812	0.111534458	42	49	36	34	32	18	0.194149554	0.234769481	0.170849399	0.128076319	0.131080834	0.07544622	Aldehyde dehydrogenase family 1 member A3 [Source:UniProtKB/Swiss-Prot;Acc:Q9JHW9]
ENSMUSG00000041736	Tspo	0.503695958	0.124475962	1	up	no	4.062519265	2.835814861	180	181	213	186	195	96	3.725447977	3.839123886	4.622985933	3.10212327	3.574811072	1.83051024	Translocator protein [Source:UniProtKB/Swiss-Prot;Acc:P50637]
ENSMUSG00000078907	Fam186b	0.503674896	0.145952772	1	up	no	0.345728218	0.214375633	41	63	52	32	30	51	0.267637326	0.417346102	0.352201224	0.169195605	0.171471488	0.302459807	family with sequence similarity 186 member B [Source:HGNC Symbol;Acc:HGNC:25296]
ENSMUSG00000038168	P3h2	0.503652753	0.125798058	1	up	no	1.461679247	1.001481616	257	261	216	199	294	102	1.498843899	1.563708872	1.322484971	0.938065784	1.516671991	0.549707073	Prolyl 3-hydroxylase 2 [Source:UniProtKB/Swiss-Prot;Acc:Q8CG71]
ENSMUSG00000071256	Zfp213	0.502968151	0.032280057	0.710390987	up	no	3.793152	2.647216333	474	521	368	420	372	329	3.870182	4.362754	3.14652	2.775455	2.679246	2.486948	zinc finger protein 213 [Source:MGI Symbol;Acc:MGI:3053094]
ENSMUSG00000036745	Ttll7	0.502510682	0.006939646	0.336593486	up	no	12.50533754	8.797821545	5985	4207	3736	3323	4603	3495	15.79698275	11.3934617	10.32556818	7.102050205	10.73725082	8.554163609	tubulin tyrosine ligase-like family, member 7 [Source:MGI Symbol;Acc:MGI:1918142]
ENSMUSG00000055897	Ppp4r1l-ps	0.502499374	0.026993923	0.669227522	up	no	0.638927474	0.421596213	326	365	352	246	351	213	0.586193951	0.668315157	0.662273313	0.357715837	0.553962148	0.353110654	protein phosphatase 4, regulatory subunit 1-like, pseudogene [Source:MGI Symbol;Acc:MGI:1924560]
ENSMUSG00000036357	Gpr101	0.501959286	0.109944722	1	up	no	2.544329	1.767285333	585	524	735	444	806	262	2.358806	2.169089	3.105092	1.449451	2.872885	0.97952	G protein-coupled receptor 101 [Source:MGI Symbol;Acc:MGI:2685211]
ENSMUSG00000090370	Gm21989	0.501498701	0.256047249	1	up	no	0.903284	0.608692333	30	74	90	37	65	52	0.403615	1.02801	1.278227	0.404266	0.774201	0.64761	predicted gene 21989 [Source:MGI Symbol;Acc:MGI:5439458]
ENSMUSG00000042599	Kdm7a	0.50001	0.000192255	0.024101349	up	no	8.148550984	5.732565906	3744	3563	3691	3120	3159	2809	8.125006752	7.932364095	8.388282107	5.48395047	6.059478403	5.654268845	Lysine-specific demethylase 7A [Source:UniProtKB/Swiss-Prot;Acc:Q3UWM4]
ENSMUSG00000019312	Grb7	0.499349884	0.132606624	1	up	no	0.340691905	0.211756688	33	62	63	33	36	45	0.195377221	0.40954508	0.417153414	0.165756085	0.205904361	0.263609619	Growth factor receptor-bound protein 7 [Source:UniProtKB/Swiss-Prot;Acc:Q03160]
ENSMUSG00000048701	Ccdc6	0.499206514	0.000554471	0.055377548	up	no	10.96037406	7.725168177	3169	3090	3137	2584	2630	2551	10.82513208	10.82847553	11.22751456	7.149358622	7.943754847	8.082391063	Coiled-coil domain-containing protein 6 [Source:UniProtKB/Swiss-Prot;Acc:D3YZP9]
ENSMUSG00000013707	Tnfaip8l2	0.499169649	0.18440529	1	up	no	2.261475	1.570776333	80	129	132	81	83	113	1.538125	2.568058	2.678242	1.26129	1.427448	2.023591	Tumor necrosis factor alpha-induced protein 8-like protein 2 [Source:UniProtKB/Swiss-Prot;Acc:Q9D8Y7]
ENSMUSG00000060257	Scrt2	0.496785559	0.010452273	0.418527485	up	no	8.796055333	6.204492333	1380	1378	1253	1206	895	1216	8.866608	9.08835	8.433208	6.279801	5.085595	7.248081	Transcriptional repressor scratch 2 [Source:UniProtKB/Swiss-Prot;Acc:Q8BTH6]
ENSMUSG00000024571	Gm16286	0.496734048	0.067518692	0.931750237	up	no	15.05211257	10.63844358	1497	1472	3217	1783	1701	1681	10.58610784	10.68679669	23.88343317	10.23075789	10.63458145	11.0499914	thioredoxin-like protein 4A isoform b [Source:RefSeq peptide;Acc:NP_001033697]
ENSMUSG00000090110	Cmc4	0.495978413	0.141137796	1	up	no	2.269950204	1.580485779	121	155	128	111	145	76	1.992213176	2.609849395	2.207788041	1.484015959	2.113149494	1.144291883	Cx9C motif-containing protein 4 [Source:UniProtKB/Swiss-Prot;Acc:Q61908]
ENSMUSG00000034551	Hdx	0.495683592	0.043423839	0.8041799	up	no	0.485850761	0.315500326	186	249	189	150	193	133	0.424571	0.581605284	0.451376	0.277902	0.39011	0.278488979	Highly divergent homeobox [Source:UniProtKB/Swiss-Prot;Acc:Q14B70]
ENSMUSG00000039488	Cntn5	0.495045212	0.103668354	1	up	no	0.74180003	0.497290323	202	95	160	123	124	112	0.966909665	0.462980426	0.795509998	0.474122744	0.520372297	0.497375928	Contactin-5 [Source:UniProtKB/Swiss-Prot;Acc:P68500]
ENSMUSG00000045648	Vwc2l	0.494942951	0.063295023	0.915757263	up	no	0.985997997	0.670613033	390	247	386	230	368	215	1.101125789	0.714561889	1.142306314	0.526766608	0.920897568	0.564174925	von Willebrand factor C domain-containing protein 2-like [Source:MGI Symbol;Acc:MGI:2444069]
ENSMUSG00000038402	Foxf2	0.494021941	0.057870873	0.890474606	up	no	2.526288333	1.764777333	303	248	253	253	193	214	2.789921	2.348122	2.440822	1.886845	1.575936	1.831551	Forkhead box protein F2 [Source:UniProtKB/Swiss-Prot;Acc:O54743]
ENSMUSG00000097055	Gm4419	0.493715502	0.089366905	1	up	no	1.054350171	0.719812236	126	138	136	118	103	100	0.971743701	1.105808218	1.085498593	0.737227428	0.705495181	0.7167141	predicted gene 4419 [Source:MGI Symbol;Acc:MGI:3782604]
ENSMUSG00000054083	Capn12	0.493708287	0.341761962	1	up	no	0.606821161	0.401982457	152	104	137	166	15	127	0.688003257	0.48165303	0.650807196	0.610274347	0.057144352	0.538528671	calpain 12 [Source:HGNC Symbol;Acc:HGNC:13249]
ENSMUSG00000070473	Cldn3	0.493403135	0.417542192	1	up	no	1.029409667	0.702273333	56	67	52	70	70	4	0.967386	1.176918	0.943925	0.980048	1.062449	0.064323	Claudin-3 [Source:UniProtKB/Swiss-Prot;Acc:Q9Z0G9]
ENSMUSG00000020953	Coch	0.493050299	0.144397639	1	up	no	3.348864561	2.350491557	423	436	495	329	616	175	3.062785672	3.232291448	3.751516564	1.929765366	3.952718397	1.168990907	Cochlin [Source:UniProtKB/Swiss-Prot;Acc:Q62507]
ENSMUSG00000020399	Havcr2	0.492850319	0.127547045	1	up	no	1.086277667	0.742992333	118	130	149	131	123	69	0.946231	1.065299	1.247303	0.849491	0.866787	0.512699	Hepatitis A virus cellular receptor 2 homolog [Source:UniProtKB/Swiss-Prot;Acc:Q8VIM0]
ENSMUSG00000040323	Gm15429	0.492710211	0.331283284	1	up	no	2.119484	1.477362333	100	27	101	36	81	67	2.718419	0.748396	2.891637	0.775499	1.958413	1.698175	predicted pseudogene 15429 [Source:MGI Symbol;Acc:MGI:3642423]
ENSMUSG00000114493	Gm47071	0.492700502	0.195324654	1	up	no	0.682575	0.456171	79	70	80	76	30	74	0.689257	0.627772	0.730696	0.538742	0.229381	0.60039	predicted gene, 47071 [Source:MGI Symbol;Acc:MGI:6095789]
ENSMUSG00000037523	Mavs	0.492650653	0.040135424	0.77466908	up	no	2.97369858	2.084533216	433	449	455	350	469	284	2.821195563	2.996262887	3.103637291	1.840701553	2.70020852	1.712689576	Mitochondrial antiviral-signaling protein [Source:UniProtKB/Swiss-Prot;Acc:Q8VCF0]
ENSMUSG00000047735	Samd9l	0.492622358	0.098737965	1	up	no	0.69308333	0.463669733	187	185	136	157	167	77	0.750540017	0.759666917	0.569043057	0.510408146	0.593599163	0.287001889	sterile alpha motif domain containing 9 like [Source:HGNC Symbol;Acc:HGNC:1349]
ENSMUSG00000033721	Vav3	0.49243525	0.030922251	0.69972847	up	no	1.289591321	0.88775517	346	330	366	300	265	280	1.254795215	1.226848816	1.387129931	0.87877741	0.849946036	0.934542066	vav 3 oncogene [Source:MGI Symbol;Acc:MGI:1888518]
ENSMUSG00000034156	Tspoap1	0.491247498	0.005274481	0.275507111	up	no	14.54737404	10.32028361	6757	5578	6228	4310	4912	6091	15.51852166	13.14435153	14.97924892	8.015937324	9.968472365	12.97644115	Peripheral-type benzodiazepine receptor-associated protein 1 [Source:UniProtKB/Swiss-Prot;Acc:Q7TNF8]
ENSMUSG00000028341	Nr4a3	0.491134172	0.251930308	1	up	no	10.72137113	7.599032883	4906	1936	1847	1598	1303	4109	17.88148749	7.237793381	7.04483253	4.714295221	4.195383063	13.88742036	Nuclear receptor subfamily 4 group A member 3 [Source:UniProtKB/Swiss-Prot;Acc:Q9QZB6]
ENSMUSG00000087574	C030037D09Rik	0.491090279	0.081445348	0.968184837	up	no	1.308939185	0.902442205	304	261	178	188	192	218	1.576628233	1.382151763	0.968037558	0.7880818	0.876480212	1.042764603	RIKEN cDNA C030037D09 gene [Source:MGI Symbol;Acc:MGI:1924865]
ENSMUSG00000006456	Rbm14	0.490460954	0.016404863	0.535771651	up	no	6.611631863	4.677323692	1404	1004	1072	865	935	1066	7.833174186	5.743056619	6.258664782	3.908653597	4.607383625	5.515933853	RNA-binding protein 14 [Source:UniProtKB/Swiss-Prot;Acc:Q8C2Q3]
ENSMUSG00000031103	Elf4	0.489482025	0.125779403	1	up	no	0.35285545	0.222560235	121	100	72	43	109	62	0.427786966	0.363660956	0.267118427	0.123163171	0.340437831	0.204079702	ETS-related transcription factor Elf-4 [Source:UniProtKB/Swiss-Prot;Acc:Q9Z2U4]
ENSMUSG00000086108	Gm5602	0.489212105	0.202333909	1	up	no	0.66604	0.445737667	39	65	55	30	57	37	0.476122	0.817794	0.704204	0.297655	0.617746	0.421812	predicted gene 5602 [Source:MGI Symbol;Acc:MGI:3645136]
ENSMUSG00000021765	Fst	0.489163772	0.148585611	1	up	no	0.39763627	0.254534953	76	67	43	30	59	48	0.478266378	0.436906631	0.2777358	0.156702969	0.328077311	0.278824579	follistatin FST315 [Source:RefSeq peptide;Acc:NP_001288302]
ENSMUSG00000072941	Sod3	0.488260513	0.01757636	0.547690146	up	no	4.720016667	3.336113333	782	801	785	611	800	553	4.564759	4.796094	4.799197	2.886438	4.128942	2.99296	superoxide dismutase 3, extracellular [Source:MGI Symbol;Acc:MGI:103181]
ENSMUSG00000020303	Stc2	0.488189203	0.049396526	0.850967417	up	no	1.389948009	0.962212776	405	303	265	282	243	265	1.70630744	1.302910517	1.16062607	0.95544411	0.898169657	1.03302456	stanniocalcin 2 [Source:MGI Symbol;Acc:MGI:1316731]
ENSMUSG00000031792	Usb1	0.48770655	0.04443843	0.812384336	up	no	2.577320119	1.809352002	352	322	301	244	291	265	2.729484336	2.566053044	2.436422978	1.526962311	1.997617093	1.903476601	U6 snRNA biogenesis 1 [Source:MGI Symbol;Acc:MGI:2142454]
ENSMUSG00000074506	Gm10705	0.48769257	0.600991221	1	up	no	15.85099167	11.275686	27	150	788	639	175	46	1.233962	7.249387	39.069626	24.499224	7.3179	2.009934	predicted gene 10705 [Source:MGI Symbol;Acc:MGI:3708678]
ENSMUSG00000026222	Sp100	0.487249155	0.07143992	0.943354292	up	no	0.501883845	0.329374329	154	157	208	181	113	111	0.434618879	0.455505901	0.615526755	0.412254616	0.285847499	0.290020872	nuclear antigen Sp100 [Source:MGI Symbol;Acc:MGI:109561]
ENSMUSG00000102997	Gm17244	0.486446231	0.131476381	1	up	no	0.666193541	0.44689453	118	89	101	105	77	65	0.750266279	0.576866672	0.671447672	0.537117115	0.429158672	0.374407803	predicted gene, 17244 [Source:MGI Symbol;Acc:MGI:4936878]
ENSMUSG00000020059	Sycp3	0.486353156	0.179407449	1	up	no	1.454508899	1.009650784	62	104	83	59	67	75	1.060723092	1.817160904	1.485642702	0.81411538	1.014214782	1.20062219	synaptonemal complex protein 3 [Source:MGI Symbol;Acc:MGI:109542]
ENSMUSG00000010051	Hyal1	0.486256322	0.207063138	1	up	no	1.242498109	0.858376032	122	301	209	239	199	86	0.695225226	1.770687558	1.261581542	1.110366537	1.00950458	0.455256979	Mus musculus hyaluronoglucosaminidase 1 (Hyal1), transcript variant 2, mRNA. [Source:RefSeq mRNA;Acc:NM_001331161]
ENSMUSG00000070392	Gm20634	0.485742668	0.764856532	1	up	no	1.265615333	0.875226	515	0	0	255	170	0	3.796846	0	0	1.520059	1.105619	0	predicted gene 20634 [Source:MGI Symbol;Acc:MGI:5313081]
ENSMUSG00000022383	Ppara	0.485461083	0.189423769	1	up	no	0.463506968	0.30249542	116	82	44	85	52	52	0.656482009	0.478191907	0.255846988	0.387227805	0.255225401	0.265033053	peroxisome proliferator activated receptor alpha [Source:MGI Symbol;Acc:MGI:104740]
ENSMUSG00000087611	4930458D05Rik	0.484352658	0.157858271	1	up	no	0.370350667	0.236215	62	36	55	30	54	30	0.4423	0.260594	0.408158	0.173084	0.339313	0.196248	RIKEN cDNA 4930458D05 gene [Source:MGI Symbol;Acc:MGI:1923052]
ENSMUSG00000061393	Acvr2b	0.483576195	0.181691822	1	up	no	0.619189426	0.414366119	168	90	77	78	127	57	0.922736292	0.498940207	0.43589178	0.340873331	0.617397327	0.284827698	Activin receptor type-2B [Source:UniProtKB/Swiss-Prot;Acc:P27040]
ENSMUSG00000036432	Siah2	0.483189974	0.021352258	0.594833752	up	no	4.851459924	3.442244972	715	663	578	615	518	500	5.201762984	4.947451181	4.405165608	3.62088963	3.332174867	3.373670419	siah E3 ubiquitin protein ligase 2 [Source:MGI Symbol;Acc:MGI:108062]
ENSMUSG00000078713	Tomm5	0.483144262	0.460219958	1	up	no	18.82706047	13.44073549	172	992	1011	1398	267	258	4.298157388	25.57514189	26.60788213	28.43277947	5.895537811	5.993889202	Mitochondrial import receptor subunit TOM5 homolog [Source:UniProtKB/Swiss-Prot;Acc:B1AXP6]
ENSMUSG00000030500	Slc17a6	0.482988726	0.088215903	0.99629562	up	no	2.946418605	2.079693779	625	673	836	464	912	392	2.52187274	2.784549767	3.532833307	1.514356402	3.256301422	1.468423514	solute carrier family 17 member 6 [Source:HGNC Symbol;Acc:HGNC:16703]
ENSMUSG00000025931	Paqr8	0.482592722	0.000515831	0.053544533	up	no	35.4027888	25.30900062	8663	8436	8962	7034	7604	7192	34.45412909	34.42523851	37.32899881	22.66074849	26.73476429	26.53148908	Mus musculus progestin and adipoQ receptor family member VIII (Paqr8), transcript variant 2, mRNA. [Source:RefSeq mRNA;Acc:NM_001355122]
ENSMUSG00000030787	Lyve1	0.482240284	0.186285268	1	up	no	0.468526358	0.306988196	66	78	42	37	68	39	0.484143872	0.593040554	0.328394648	0.217814074	0.439032202	0.264118313	Lymphatic vessel endothelial hyaluronic acid receptor 1 [Source:UniProtKB/Swiss-Prot;Acc:Q8BHC0]
ENSMUSG00000106164	9430085M18Rik	0.481945816	0.32016993	1	up	no	0.860440667	0.587686333	34	71	33	19	32	57	0.617377	1.331864	0.632081	0.272084	0.519143	0.971832	RIKEN cDNA 9430085M18 gene [Source:MGI Symbol;Acc:MGI:1924611]
ENSMUSG00000028195	Cyr61	0.481381603	0.070054153	0.938967994	up	no	2.783133667	1.965163667	262	254	240	197	244	185	2.826356	2.814902	2.708143	1.718393	2.323079	1.854019	Protein CYR61 [Source:UniProtKB/Swiss-Prot;Acc:P18406]
ENSMUSG00000019916	P4ha1	0.480923616	0.001345872	0.105959821	up	no	13.4318564	9.59582898	2413	2609	2395	2293	2054	1893	12.79600747	14.19491184	13.3046499	9.850336575	9.624938168	9.312212198	Prolyl 4-hydroxylase subunit alpha-1 [Source:UniProtKB/Swiss-Prot;Acc:Q60715]
ENSMUSG00000021326	Trim27	0.48059658	0.024488158	0.637163265	up	no	4.805366665	3.415584079	1283	1178	1096	1006	761	1186	5.083177446	4.785673169	4.547249381	3.225135517	2.663536967	4.358079752	Zinc finger protein RFP [Source:UniProtKB/Swiss-Prot;Acc:Q62158]
ENSMUSG00000093445	Lrch4	0.480316908	0.078051596	0.959452284	up	no	2.038334149	1.432801	497	287	300	370	267	260	2.753926262	1.622695969	1.738380217	1.663382343	1.303602549	1.331418108	Leucine-rich repeat and calponin homology domain-containing protein 4 [Source:UniProtKB/Swiss-Prot;Acc:Q921G6]
ENSMUSG00000031822	Gse1	0.480020523	0.000449559	0.049170907	up	no	12.23848737	8.746293519	5507	5717	5774	5224	4965	4130	11.60491709	12.3629369	12.74760813	8.918940101	9.249520445	8.07042001	tic suppressor element 1 [Source:UniProtKB/Swiss-Prot;Acc:Q3U3C9]
ENSMUSG00000040749	Siah1b	0.479885945	0.11801846	1	up	no	2.14726199	1.511363947	162	247	203	153	157	195	1.658968814	2.599711285	2.183105872	1.270204398	1.42230631	1.841581132	siah E3 ubiquitin protein ligase 1B [Source:MGI Symbol;Acc:MGI:108063]
ENSMUSG00000060586	H2-Eb1	0.479575167	0.252298412	1	up	no	1.403629667	0.978386333	89	90	46	57	90	38	1.630869	1.701414	0.878606	0.845809	1.454397	0.634953	_
ENSMUSG00000106928	Gm43860	0.478018982	0.177612821	1	up	no	0.738887	0.502289667	97	101	72	100	48	69	0.780656	0.831934	0.604071	0.652761	0.341271	0.512837	predicted gene 43860 [Source:MGI Symbol;Acc:MGI:5663997]
ENSMUSG00000028211	Trp53inp1	0.477665606	0.015418791	0.520546732	up	no	2.665282625	1.885856439	811	790	723	589	754	580	2.725390851	2.726689615	2.54376741	1.60515969	2.24403768	1.808371949	transformation related protein 53 inducible nuclear protein 1 [Source:MGI Symbol;Acc:MGI:1926609]
ENSMUSG00000031502	Col4a1	0.477174066	0.002676841	0.169745023	up	no	6.703071227	4.787213489	2323	2442	1962	1860	1920	1846	6.791011186	7.318568825	5.999633669	4.400295236	4.958336894	5.003008337	Collagen alpha-1(IV) chain Arresten [Source:UniProtKB/Swiss-Prot;Acc:P02463]
ENSMUSG00000033326	Kdm4a	0.477056711	0.005477161	0.281581369	up	no	8.919513546	6.379995967	2551	2582	1808	1960	2000	1856	9.621036152	9.999476467	7.138028021	5.983564274	6.666661094	6.489762534	Lysine-specific demethylase 4A [Source:UniProtKB/Swiss-Prot;Acc:Q8BW72]
ENSMUSG00000025078	Nhlrc2	0.477007048	0.062081866	0.907397462	up	no	2.813763	1.993441333	550	511	428	380	564	294	3.04962	2.90503	2.486639	1.706653	2.761722	1.511949	NHL repeat-containing protein 2 [Source:UniProtKB/Swiss-Prot;Acc:Q8BZW8]
ENSMUSG00000039501	Znfx1	0.475323736	0.001734466	0.123976307	up	no	7.060313954	5.050452221	2609	2766	2391	2119	2223	2162	6.950905112	7.561107017	6.668929732	4.572024	5.23578864	5.343544023	zinc finger, NFX1-type containing 1 [Source:MGI Symbol;Acc:MGI:2138982]
ENSMUSG00000025350	Rdh5	0.47476166	0.27841558	1	up	no	3.034605397	2.155617091	385	450	321	372	525	79	2.962755836	3.561299098	2.579761258	2.326578821	3.584403571	0.55586888	Mus musculus retinol dehydrogenase 5 (Rdh5), transcript variant 2, mRNA. [Source:RefSeq mRNA;Acc:NM_001358527]
ENSMUSG00000071860	2900055J20Rik	0.474657035	0.236709964	1	up	no	4.086725333	2.912926	122	152	124	54	141	132	3.665492	4.705263	3.889421	1.315989	3.749493	3.673296	RIKEN cDNA 2900055J20 gene [Source:MGI Symbol;Acc:MGI:1920251]
ENSMUSG00000052137	Rbm12b2	0.474102169	0.030938191	0.69972847	up	no	3.644288417	2.595568176	597	495	607	434	537	445	3.752410873	3.188999057	3.991455321	2.208145984	2.982983427	2.595575118	Mus musculus RNA binding motif protein 12 B2 (Rbm12b2), transcript variant 3, mRNA. [Source:RefSeq mRNA;Acc:NM_001356563]
ENSMUSG00000001247	Lsr	0.473783864	0.034705138	0.730735955	up	no	4.514961832	3.223111849	475	446	403	417	371	324	4.754607257	4.567088779	4.223189461	3.384013306	3.285653314	2.999668928	Lipolysis-stimulated lipoprotein receptor [Source:UniProtKB/Swiss-Prot;Acc:Q99KG5]
ENSMUSG00000054412	Gm4793	0.473733133	0.121252574	1	up	no	1.500816333	1.052746	221	172	138	138	133	163	1.837039	1.46534	1.20007	0.926886	0.977432	1.25392	_
ENSMUSG00000078716	Tmem8b	0.472959621	0.028025627	0.676642436	up	no	12.32041125	8.848720492	2534	2421	4198	2615	2385	2733	9.941960864	9.754066209	17.26520668	8.312897248	8.282710878	9.950553349	Mus musculus transmembrane protein 8B (Tmem8b), transcript variant 2, mRNA. [Source:RefSeq mRNA;Acc:NM_001355718]
ENSMUSG00000111447	Gm48249	0.47196824	0.145778767	1	up	no	2.419464426	1.716484237	113	151	118	93	108	114	2.102619918	2.861595911	2.29417745	1.406482192	1.773665363	1.969305156	predicted gene, 48249 [Source:MGI Symbol;Acc:MGI:6097661]
ENSMUSG00000026525	Opn3	0.471801903	0.301112029	1	up	no	0.585073333	0.393981333	58	19	74	57	28	36	0.661005	0.212966	0.881249	0.526202	0.2787	0.377042	Opsin-3 [Source:UniProtKB/Swiss-Prot;Acc:Q9WUK7]
ENSMUSG00000062151	Unc13c	0.471780484	0.070718428	0.941043657	up	no	1.962802667	1.387433667	1050	618	659	460	857	591	2.605456	1.571228	1.711724	0.924561	1.879285	1.358455	unc-13 homolog C (C. elegans) [Source:MGI Symbol;Acc:MGI:2149021]
ENSMUSG00000020032	Nuak1	0.47172556	0.001310436	0.104029316	up	no	15.54927466	11.18471693	4089	4031	3629	3283	3049	3553	15.86107998	16.04372075	14.74302325	10.31541705	10.45636633	12.78236742	NUAK family SNF1-like kinase 1 [Source:UniProtKB/Swiss-Prot;Acc:Q641K5]
ENSMUSG00000041324	Inhba	0.471706347	0.082474474	0.970166566	up	no	1.259540553	0.880379918	287	404	388	206	333	338	0.980088	1.412401611	1.386132049	0.568219354	1.002282867	1.070637534	Inhibin beta A chain [Source:UniProtKB/Swiss-Prot;Acc:Q04998]
ENSMUSG00000050900	Gm7327	0.471596059	0.417743936	1	up	no	2.943022	2.094525	27	80	148	45	130	40	0.898963	2.743891	5.186212	1.218851	3.845852	1.218872	predicted gene 7327 [Source:MGI Symbol;Acc:MGI:3646274]
ENSMUSG00000074283	Zfp109	0.471174989	0.105429888	1	up	no	1.904900333	1.346288667	312	242	200	197	272	155	2.318187	1.844376	1.552138	1.182639	1.786769	1.069458	zinc finger protein 109 [Source:MGI Symbol;Acc:MGI:1929099]
ENSMUSG00000046480	Scn4b	0.471054806	0.041829756	0.79052617	up	no	4.563765	3.264612333	871	998	1176	733	742	1065	3.812091	4.485556	5.393648	2.598572	2.870257	4.325008	Sodium channel subunit beta-4 [Source:UniProtKB/Swiss-Prot;Acc:Q7M729]
ENSMUSG00000029032	Arhgef16	0.470799202	0.200894769	1	up	no	0.140411737	0.073472639	40	28	40	6	54	4	0.149655926	0.111835529	0.159743755	0.016767593	0.189220199	0.014430124	Rho guanine nucleotide exchange factor 16 [Source:UniProtKB/Swiss-Prot;Acc:Q3U5C8]
ENSMUSG00000091423	Gm17509	0.470674515	0.23852624	1	up	no	2.351038667	1.668736	340	221	192	204	342	84	3.123461	2.082653	1.847002	1.5165	2.775207	0.714501	_
ENSMUSG00000029313	Aff1	0.470503331	0.010070557	0.41132798	up	no	3.113020127	2.218877627	1412	1231	1314	959	1248	1088	3.254939958	2.911222354	3.172898069	1.789448625	2.543499784	2.323684472	AF4/FMR2 family member 1 [Source:HGNC Symbol;Acc:HGNC:7135]
ENSMUSG00000004110	Cacna1e	0.470068661	0.06121424	0.904712486	up	no	9.372384833	6.738401043	10143	14970	6686	6583	10207	9722	8.773011987	13.28763282	6.05650969	4.611768063	7.804022375	7.799412692	calcium voltage-gated channel subunit alpha1 E [Source:HGNC Symbol;Acc:HGNC:1392]
ENSMUSG00000030103	Bhlhe40	0.470046211	0.002649473	0.168665865	up	no	25.112156	18.10170104	4661	5704	5471	5316	4007	4164	21.61853269	27.14336511	26.57457019	19.96896623	16.42696024	17.90917664	Class E basic helix-loop-helix protein 40 [Source:UniProtKB/Swiss-Prot;Acc:O35185]
ENSMUSG00000079018	Ly6c1	0.469000819	0.016839682	0.53959148	up	no	20.27742214	14.62196999	1479	1284	1800	1559	1254	1083	19.22172214	17.10953163	24.50101266	16.41882889	14.40136276	13.04571831	Lymphocyte antigen 6C1 [Source:UniProtKB/Swiss-Prot;Acc:P0CW02]
ENSMUSG00000026414	Tnnt2	0.468718381	0.073216059	0.950743137	up	no	0.234413072	0.141648973	93	88	69	46	82	49	0.256848579	0.250330634	0.196060003	0.099920013	0.20094754	0.124079365	Troponin T, cardiac muscle [Source:UniProtKB/Swiss-Prot;Acc:P50752]
ENSMUSG00000082475	Gm7206	0.468085249	0.601067336	1	up	no	4.963393333	3.560445667	114	122	104	141	153	0	4.861162	5.364974	4.664044	4.872741	5.808596	0	predicted pseudogene 7206 [Source:MGI Symbol;Acc:MGI:3646634]
ENSMUSG00000043872	Zmym1	0.468052139	0.074223572	0.953291103	up	no	3.24266284	2.31654474	624	638	556	597	650	294	3.266478251	3.419267295	3.042242974	2.526229287	3.00760764	1.415797293	zinc finger, MYM domain containing 1 [Source:MGI Symbol;Acc:MGI:1915560]
ENSMUSG00000026004	Kansl1l	0.467857302	0.024221918	0.636722237	up	no	1.897570452	1.344318665	536	584	582	501	522	399	1.746796269	1.957433469	1.988481619	1.32432059	1.506255452	1.202379953	Mus musculus KAT8 regulatory NSL complex subunit 1-like (Kansl1l), transcript variant 3, mRNA. [Source:RefSeq mRNA;Acc:NM_001357156]
ENSMUSG00000092090	Gm3294	0.467844834	0.057584231	0.890474606	up	no	0.137812667	0.071949	50	45	43	20	46	18	0.146472	0.135689	0.131277	0.047957	0.119056	0.048834	predicted gene 3294 [Source:MGI Symbol;Acc:MGI:3781472]
ENSMUSG00000104965	Gm43437	0.467794948	0.168143306	1	up	no	0.893347	0.618258333	122	155	198	203	110	81	0.66829	0.872098	1.139653	0.907389	0.5335	0.413886	predicted gene 43437 [Source:MGI Symbol;Acc:MGI:5663574]
ENSMUSG00000019817	Plagl1	0.46779315	0.079828399	0.965483237	up	no	3.587836454	2.56656321	1690	980	1123	1057	1491	641	4.697274239	2.798509826	3.267725298	2.379892458	3.667694711	1.652102461	_
ENSMUSG00000035621	Midn	0.467000658	0.001707418	0.123920653	up	no	13.29737381	9.592559356	2631	2627	2440	2351	2095	2081	13.31931887	13.64170704	12.93109553	9.643582429	9.372658294	9.761437345	Mus musculus midnolin (Midn), transcript variant 4, mRNA. [Source:RefSeq mRNA;Acc:NM_001347117]
ENSMUSG00000031253	Srpx2	0.466747774	0.180264506	1	up	no	0.330401807	0.211436138	44	50	38	26	28	44	0.325087211	0.374473934	0.291644274	0.15296645	0.182705479	0.298636485	Sushi repeat-containing protein SRPX2 [Source:UniProtKB/Swiss-Prot;Acc:Q8R054]
ENSMUSG00000020681	Ace	0.466611529	0.327950904	1	up	no	15.73868248	11.361857	4567	3558	3077	3449	5604	551	18.84944942	15.06535483	13.30124318	11.53062584	20.45171729	2.103227868	angiotensin I converting enzyme (peptidyl-dipeptidase A) 1 [Source:MGI Symbol;Acc:MGI:87874]
ENSMUSG00000032596	Uba7	0.466343547	0.074281583	0.953291103	up	no	0.383706154	0.250104923	110	125	122	82	96	93	0.348600291	0.403423847	0.399094325	0.209489139	0.269229933	0.271595696	ubiquitin-like modifier activating enzyme 7 [Source:MGI Symbol;Acc:MGI:1349462]
ENSMUSG00000086822	5330413P13Rik	0.46589741	0.09110589	1	up	no	0.35732304	0.231111288	103	102	91	63	68	90	0.366441598	0.374450453	0.331077068	0.183926374	0.210435839	0.298971651	RIKEN cDNA 5330413P13 gene [Source:MGI Symbol;Acc:MGI:3041161]
ENSMUSG00000030302	Atp2b2	0.465243017	0.020928336	0.58502418	up	no	28.64354451	20.72035924	16471	17768	14282	9378	16413	14898	28.50193449	31.54821866	25.88048039	13.14246477	25.10780123	23.91081174	Plasma membrane calcium-transporting ATPase 2 [Source:UniProtKB/Swiss-Prot;Acc:Q9R0K7]
ENSMUSG00000093908	Gm5784	0.464758422	0.156691147	1	up	no	0.501713064	0.335996713	76	121	84	61	103	57	0.394305699	0.650427497	0.460405997	0.254516615	0.476096574	0.277376949	_
ENSMUSG00000036814	Slc6a20a	0.464142609	0.064255233	0.91937448	up	no	4.459998469	3.205550903	899	842	709	763	905	412	4.796933756	4.61478817	3.968273482	3.302139769	4.272410505	2.042102436	Sodium- and chloride-dependent transporter XTRP3A [Source:UniProtKB/Swiss-Prot;Acc:Q8VDB9]
ENSMUSG00000056260	Lrif1	0.463896655	0.03203914	0.707862658	up	no	1.107545811	0.775501324	532	413	433	360	380	391	1.255719164	0.996610508	1.070307761	0.687400897	0.78728241	0.851820666	Ligand-dependent nuclear receptor-interacting factor 1 [Source:UniProtKB/Swiss-Prot;Acc:Q8CDD9]
ENSMUSG00000097445	Gm26631	0.463576415	0.175977663	1	up	no	0.435279	0.288177	50	51	47	39	35	41	0.432987	0.448173	0.424677	0.273145	0.265432	0.325954	predicted gene, 26631 [Source:MGI Symbol;Acc:MGI:5477125]
ENSMUSG00000002324	Rec8	0.463331955	0.236569995	1	up	no	0.795646095	0.549620349	133	75	112	80	138	42	0.972925122	0.556558341	0.857454822	0.474619446	0.895957625	0.278283975	Meiotic recombination [Source:UniProtKB/Swiss-Prot;Acc:Q8C5S7]
ENSMUSG00000112964	E430024I08Rik	0.46131406	0.158695684	1	up	no	0.497528989	0.333999881	106	95	113	80	120	50	0.491777459	0.450304699	0.550504807	0.302560844	0.48799822	0.211440578	RIKEN cDNA E430024I08 gene [Source:MGI Symbol;Acc:MGI:3649010]
ENSMUSG00000027868	Tbx15	0.460819693	0.286764243	1	up	no	0.272037803	0.170312744	26	47	64	24	68	10	0.149745353	0.277299088	0.389068968	0.113184098	0.347577934	0.050176199	T-box transcription factor TBX15 [Source:UniProtKB/Swiss-Prot;Acc:O70306]
ENSMUSG00000040452	Cdh12	0.460061061	0.045888744	0.824530172	up	no	1.518245442	1.076392408	449	479	363	317	427	326	1.54792692	1.69608863	1.310720775	0.885878334	1.302417556	1.040881334	Cadherin-12 [Source:UniProtKB/Swiss-Prot;Acc:Q5RJH3]
ENSMUSG00000058571	Gpc6	0.459868816	0.234466646	1	up	no	0.844068619	0.586387324	332	287	119	131	338	127	1.121705197	0.99365301	0.41684765	0.355849014	1.009533127	0.39377983	glypican 6 [Source:MGI Symbol;Acc:MGI:1346322]
ENSMUSG00000019951	Uhrf1bp1l	0.459433251	0.002302562	0.151922497	up	no	6.719884458	4.859910358	2814	2725	2795	2219	2442	2395	6.645347681	6.60052711	6.913778584	4.241350413	5.095006646	5.243374015	UHRF1 (ICBP90) binding protein 1-like [Source:MGI Symbol;Acc:MGI:2442888]
ENSMUSG00000009739	Pou6f1	0.459211537	0.065241198	0.924552878	up	no	14.28128589	10.36071265	4100	4766	4452	4344	2153	4832	12.86557768	15.34678156	14.63149842	11.04755095	5.966117971	14.06846904	POU domain, class 6, transcription factor 1 [Source:MGI Symbol;Acc:MGI:102935]
ENSMUSG00000042608	Stk40	0.459074529	0.007553584	0.350714433	up	no	8.490974884	6.1495284	1706	1491	1500	1272	1326	1381	9.041698532	8.104630858	8.326595261	5.455019362	6.209119146	6.784446693	Serine/threonine-protein kinase 40 [Source:UniProtKB/Swiss-Prot;Acc:Q7TNL3]
ENSMUSG00000000732	Icosl	0.458935626	0.043284914	0.803433081	up	no	2.484060395	1.779962863	525	421	598	468	421	414	2.475347772	2.032344088	2.944489324	1.784455253	1.750370627	1.80506271	icos ligand [Source:MGI Symbol;Acc:MGI:1354701]
ENSMUSG00000081021	Gm11964	0.458874917	0.272958537	1	up	no	2.666438333	1.912731667	73	45	44	40	43	51	3.545388	2.220127	2.2338	1.566313	1.867052	2.30483	predicted gene 11964 [Source:MGI Symbol;Acc:MGI:3652241]
ENSMUSG00000020593	Lpin1	0.458860252	0.01796424	0.555527941	up	no	2.218351065	1.586741388	932	906	1044	976	686	770	2.09759806	2.095826774	2.461628361	1.784212133	1.36620265	1.609809382	Mus musculus lipin 1 (Lpin1), transcript variant 4, mRNA. [Source:RefSeq mRNA;Acc:NM_001355598]
ENSMUSG00000034538	Zfp418	0.458550195	0.103775853	1	up	no	0.702669083	0.484116094	178	163	167	186	112	118	0.722472799	0.677040915	0.708493535	0.612747757	0.399376103	0.440224421	zinc finger protein 418 [Source:MGI Symbol;Acc:MGI:2444763]
ENSMUSG00000020241	Col6a2	0.458070268	0.069013749	0.935704714	up	no	0.887889456	0.619143334	455	304	242	272	301	242	1.188730413	0.81248276	0.662455196	0.576986299	0.695383552	0.585060152	Mus musculus collagen, type VI, alpha 2 (Col6a2), transcript variant 2, mRNA. [Source:RefSeq mRNA;Acc:NM_001347207]
ENSMUSG00000097786	4933429H19Rik	0.457128906	0.360654381	1	up	no	1.032763924	0.725144286	51	51	37	18	37	59	1.116755285	1.138717275	0.84281921	0.309143279	0.701069572	1.165220007	RIKEN cDNA 4933429H19 gene [Source:MGI Symbol;Acc:MGI:1918530]
ENSMUSG00000027510	Rbm38	0.455055264	0.133987324	1	up	no	1.164957334	0.822763895	125	155	171	141	133	107	0.939109827	1.201547878	1.354214297	0.851279558	0.870991223	0.746020902	RNA-binding protein 38 [Source:UniProtKB/Swiss-Prot;Acc:Q62176]
ENSMUSG00000012428	Steap4	0.454770768	0.399718087	1	up	no	0.443399333	0.296478333	64	64	60	60	88	4	0.442395	0.453842	0.433961	0.331012	0.532755	0.025668	Metalloreductase STEAP4 [Source:UniProtKB/Swiss-Prot;Acc:Q923B6]
ENSMUSG00000039911	Spsb1	0.454305072	0.014150542	0.502421317	up	no	6.612271168	4.799029329	1198	1497	1210	1083	1136	1105	5.941479899	7.615498655	6.27983495	4.351119798	4.974441159	5.071527029	SPRY domain-containing SOCS box protein 1 [Source:UniProtKB/Swiss-Prot;Acc:Q9D5L7]
ENSMUSG00000038506	Dcun1d2	0.454155778	0.098932769	1	up	no	6.783843437	4.924773298	1612	1580	1362	719	1375	1709	7.042238393	7.082077209	6.227214709	2.539915841	5.309740663	6.924663388	DCN1-like protein 2 [Source:UniProtKB/Swiss-Prot;Acc:Q8BZJ7]
ENSMUSG00000105784	Gm35065	0.454144604	0.321741937	1	up	no	2.269519333	1.629613667	34	41	57	50	36	27	1.706125	2.102183	3.00025	2.05284	1.594103	1.241898	predicted gene, 35065 [Source:MGI Symbol;Acc:MGI:5594224]
ENSMUSG00000001036	Epn2	0.453947996	0.072099642	0.945434597	up	no	22.06386314	16.08055808	6092	5633	3817	5921	2647	4777	25.41166116	24.11916072	16.66076755	20.00785034	9.754690628	18.47913326	Epsin-2 [Source:UniProtKB/Swiss-Prot;Acc:Q8CHU3]
ENSMUSG00000037621	Atoh8	0.453845485	0.145751653	1	up	no	1.637391353	1.168459343	152	202	198	178	187	102	1.31918796	1.802505014	1.790481086	1.24895643	1.436155465	0.820266133	8 [Source:UniProtKB/Swiss-Prot;Acc:Q99NA2]
ENSMUSG00000037086	Prr32	0.453533752	0.541439198	1	up	no	6.818854333	4.952507	352	358	307	359	519	8	6.920619	7.220893	6.315051	5.707539	9.018173	0.131809	Proline-rich protein 32 [Source:UniProtKB/Swiss-Prot;Acc:A2AFE9]
ENSMUSG00000024188	Luc7l	0.453357962	0.00232863	0.1530229	up	no	10.46468123	7.615819373	3762	3164	3627	3375	2673	2987	10.92868809	9.428693927	11.03666168	7.939388018	6.862212632	8.04585747	Luc7-like [Source:MGI Symbol;Acc:MGI:1914228]
ENSMUSG00000031488	Rab11fip1	0.452659683	0.098608697	1	up	no	0.513077568	0.347972427	308	194	247	236	253	112	0.618408872	0.399961017	0.520862815	0.384250763	0.449813105	0.209853413	Rab11 family-interacting protein 1 [Source:UniProtKB/Swiss-Prot;Acc:Q9D620]
ENSMUSG00000074213	Gm10642	0.452356584	0.085338386	0.982427169	up	no	5.061975333	3.672619667	411	374	313	248	313	362	5.559114	5.19242	4.434392	2.721738	3.744689	4.551432	_
ENSMUSG00000031534	Smim19	0.452302514	0.129962619	1	up	no	9.518422163	6.929868658	585	679	606	455	360	764	8.719791388	10.38053429	9.454940811	5.489127891	4.727562632	10.57291545	Small integral membrane protein 19 [Source:UniProtKB/Swiss-Prot;Acc:Q80ZU4]
ENSMUSG00000087596	Gm11715	0.452164476	0.248105096	1	up	no	1.728796	1.23675	53	55	55	48	50	39	1.637981	1.753139	1.795268	1.209602	1.37108	1.129568	predicted gene 11715 [Source:MGI Symbol;Acc:MGI:3702026]
ENSMUSG00000021365	Nedd9	0.452125528	0.020504266	0.580135463	up	no	2.46811469	1.777202265	744	716	657	629	632	531	2.542234299	2.510120859	2.351988912	1.740973587	1.909982967	1.68065024	neural precursor cell expressed, developmentally down-regulated gene 9 [Source:MGI Symbol;Acc:MGI:97302]
ENSMUSG00000030792	Dkkl1	0.452005759	0.235164959	1	up	no	0.666175154	0.46009381	48	42	55	51	32	35	0.629331707	0.580437058	0.788756696	0.557347393	0.388049221	0.434884814	Dickkopf-like protein 1 [Source:UniProtKB/Swiss-Prot;Acc:Q9QZL9]
ENSMUSG00000038205	Prkab2	0.451138315	0.018928579	0.569351296	up	no	8.861572617	6.45508101	2011	1821	2227	1938	1368	1882	8.603820708	7.993613733	9.987283409	6.719218106	5.174343728	7.471681195	protein kinase, AMP-activated, beta 2 non-catalytic subunit [Source:MGI Symbol;Acc:MGI:1336185]
ENSMUSG00000002948	Map2k7	0.450799223	0.171164135	1	up	no	16.13242655	11.77625074	3370	1501	3426	1878	1669	3459	19.19480743	8.760095278	20.44237694	8.656864244	8.390526429	18.28136156	Dual specificity mitogen-activated protein kinase kinase 7 [Source:UniProtKB/Swiss-Prot;Acc:Q8CE90]
ENSMUSG00000010080	Epn3	0.450338073	0.374566703	1	up	no	2.34626607	1.69035199	472	482	334	437	614	54	2.525398071	2.651027736	1.862372405	1.897819376	2.909270711	0.263965884	Epsin-3 [Source:UniProtKB/Swiss-Prot;Acc:Q91W69]
ENSMUSG00000105352	C030018K13Rik	0.449929229	0.248912272	1	up	no	1.034827779	0.730783312	49	84	82	43	77	57	0.683759527	1.209641828	1.211081982	0.48923153	0.951293367	0.75182504	RIKEN cDNA C030018K13 gene [Source:MGI Symbol;Acc:MGI:1924632]
ENSMUSG00000034158	Lrrc58	0.449501721	0.002090979	0.143179368	up	no	13.44495367	9.818911667	5110	5226	5184	4031	5055	4182	12.962559	13.601555	13.770747	8.282806	11.335803	9.838126	Leucine-rich repeat-containing protein 58 [Source:UniProtKB/Swiss-Prot;Acc:Q3UGP9]
ENSMUSG00000047904	Sstr2	0.448234319	0.030961784	0.69972847	up	no	6.312338955	4.599855397	600	619	599	574	497	489	6.103763882	6.464936	6.368316983	4.734999	4.454072691	4.6104945	Somatostatin receptor type 2 [Source:UniProtKB/Swiss-Prot;Acc:P30875]
ENSMUSG00000024912	Fosl1	0.448114734	0.162363733	1	up	no	2.834391667	2.050909333	221	195	235	200	124	228	2.815931	2.55123	3.136014	2.063408	1.396116	2.693204	Fos-related antigen 1 [Source:UniProtKB/Swiss-Prot;Acc:P48755]
ENSMUSG00000043279	Trim56	0.44766008	0.055221942	0.878612932	up	no	1.52381133	1.090628997	703	559	641	502	718	380	1.651179569	1.345763066	1.574491354	0.955057117	1.490371176	0.826458697	tripartite motif containing 56 [Source:HGNC Symbol;Acc:HGNC:19028]
ENSMUSG00000028480	Glipr2	0.447604091	0.134137361	1	up	no	1.460638333	1.044353	128	159	168	124	130	129	1.202986	1.531058	1.647871	0.93769	1.07372	1.121649	Golgi-associated plant pathosis-related protein 1 [Source:UniProtKB/Swiss-Prot;Acc:Q9CYL5]
ENSMUSG00000021567	Nkd2	0.446488075	0.053931272	0.873675881	up	no	4.038651793	2.937054499	1059	837	731	920	546	782	4.786017795	3.875526919	3.454410666	3.364692979	2.176923423	3.269547095	Mus musculus naked cuticle 2 (Nkd2), transcript variant 2, mRNA. [Source:RefSeq mRNA;Acc:NM_001347535]
ENSMUSG00000078515	Ddi2	0.446402864	0.001974612	0.136357025	up	no	6.8304349	4.986040757	2898	2948	2911	2541	2599	2364	6.620402555	6.906860211	6.964041934	4.70193939	5.248897584	5.007285297	2 [Source:UniProtKB/Swiss-Prot;Acc:A2ADY9]
ENSMUSG00000030067	Foxp1	0.446360088	0.10027011	1	up	no	2.550108821	1.844893982	2536	1161	1066	1171	1451	1380	4.014185304	1.874369633	1.761771526	1.496329934	2.023108333	2.015243678	Mus musculus forkhead box P1 (Foxp1), transcript variant 4, mRNA. [Source:RefSeq mRNA;Acc:NM_001347345]
ENSMUSG00000112300	Gm47976	0.445997452	0.299218931	1	up	no	0.510805	0.348377667	17	45	44	34	31	21	0.234892	0.647488	0.650035	0.38787	0.384178	0.273085	predicted gene, 47976 [Source:MGI Symbol;Acc:MGI:6097260]
ENSMUSG00000039457	Ppl	0.44581167	0.115095919	1	up	no	0.270920379	0.172319041	64	112	76	48	80	59	0.202024089	0.361051396	0.249685651	0.121308615	0.223877841	0.171770668	periplakin [Source:MGI Symbol;Acc:MGI:1194898]
ENSMUSG00000001029	Icam2	0.445484459	0.176189193	1	up	no	1.247051675	0.889190807	96	109	116	87	89	93	1.083993163	1.269040797	1.388121065	0.797986364	0.890665748	0.978920309	Intercellular adhesion molecule 2 [Source:UniProtKB/Swiss-Prot;Acc:P35330]
ENSMUSG00000108325	Gm44898	0.445398001	0.236925041	1	up	no	0.518702333	0.354363667	74	55	29	48	40	38	0.722652	0.545249	0.288206	0.376574	0.344204	0.342313	predicted gene 44898 [Source:MGI Symbol;Acc:MGI:5753474]
ENSMUSG00000044434	Gm9791	0.444835515	0.275267236	1	up	no	4.665605667	3.401138333	74	74	131	93	69	80	3.606558	3.695308	6.694951	3.644266	2.947261	3.611888	predicted pseudogene 9791 [Source:MGI Symbol;Acc:MGI:3642317]
ENSMUSG00000033590	Myo5c	0.443357044	0.330258985	1	up	no	0.258751559	0.163833554	118	105	118	93	158	6	0.262642019	0.239107659	0.274504997	0.166997662	0.312179764	0.012323237	myosin VC [Source:HGNC Symbol;Acc:HGNC:7604]
ENSMUSG00000033498	Strc	0.443049046	0.127362122	1	up	no	0.174262331	0.101741437	38	57	52	43	45	16	0.131375225	0.200969393	0.190442375	0.11994177	0.134069019	0.051213523	Stereocilin [Source:UniProtKB/Swiss-Prot;Acc:Q8VIM6]
ENSMUSG00000021959	Lats2	0.442670375	0.019025801	0.571019309	up	no	11.50196497	8.436394726	3835	3560	3380	2630	2670	3879	12.00462284	11.42635964	11.07491243	6.668412421	7.383299417	11.25747234	Serine/threonine-protein kinase LATS2 [Source:UniProtKB/Swiss-Prot;Acc:Q7TSJ6]
ENSMUSG00000024486	Hbegf	0.442529466	0.055202629	0.878612932	up	no	4.438025333	3.239275667	480	499	436	492	396	333	4.41277	4.709297	4.192009	3.663609	3.217738	2.83648	Proheparin-binding EGF-like growth factor Heparin-binding EGF-like growth factor [Source:UniProtKB/Swiss-Prot;Acc:Q06186]
ENSMUSG00000025979	Mob4	0.442432807	0.097326136	1	up	no	8.843474668	6.481437103	2127	2284	1371	2318	1048	1646	9.556211751	10.53157343	6.442638825	8.434803114	4.154770443	6.854737753	MOB-like protein phocein [Source:UniProtKB/Swiss-Prot;Acc:Q6PEB6]
ENSMUSG00000037466	Tedc1	0.441916988	0.168378268	1	up	no	0.274801755	0.175912481	57	69	36	39	37	46	0.285624255	0.348841191	0.189939819	0.15708514	0.157391546	0.213260758	tubulin epsilon and delta complex 1 [Source:MGI Symbol;Acc:MGI:2144738]
ENSMUSG00000044033	Ccdc141	0.441854622	0.079468027	0.963670826	up	no	1.654202397	1.191422073	882	1004	726	656	1086	469	1.639384593	1.912451846	1.410770752	0.985585032	1.784376744	0.804304443	coiled-coil domain containing 141 [Source:MGI Symbol;Acc:MGI:1919735]
ENSMUSG00000070427	Il18bp	0.441574869	0.161608128	1	up	no	0.730641976	0.511626922	96	90	113	82	87	78	0.685076833	0.660965305	0.84588379	0.473114322	0.546822713	0.51494373	Interleukin-18-binding protein [Source:UniProtKB/Swiss-Prot;Acc:Q9Z0M9]
ENSMUSG00000031217	Efnb1	0.441186866	0.036690696	0.749314686	up	no	4.680342883	3.420858473	845	633	695	729	568	573	5.336997565	4.103654861	4.600376223	3.733173448	3.173834685	3.355567284	Ephrin-B1 [Source:UniProtKB/Swiss-Prot;Acc:P52795]
ENSMUSG00000035735	Dagla	0.441148886	0.194078041	1	up	no	25.15159002	18.49900376	7746	3798	7856	9597	3301	4229	29.41501971	14.79828357	31.24146679	29.52158842	11.07909142	14.89633145	Sn1-specific diacylglycerol lipase alpha [Source:UniProtKB/Swiss-Prot;Acc:Q6WQJ1]
ENSMUSG00000085614	1700123M08Rik	0.441097393	0.502111944	1	up	no	0.6439863	0.448001052	10	60	41	59	15	23	0.172745131	1.036116433	0.723097337	0.801901563	0.203337873	0.338763721	RIKEN cDNA 1700123M08 gene [Source:MGI Symbol;Acc:MGI:1923915]
ENSMUSG00000024565	Sall3	0.440981229	0.075179855	0.955612706	up	no	1.019746	0.724842333	287	319	336	259	218	308	0.90942	1.035404	1.114414	0.662896	0.608314	0.903317	Sal-like protein 3 [Source:UniProtKB/Swiss-Prot;Acc:Q62255]
ENSMUSG00000070366	Plpp4	0.43984431	0.135920471	1	up	no	3.475597928	2.535981429	225	227	231	258	183	153	3.356432628	3.469561892	3.600799265	3.096610129	2.399027923	2.112306235	Phospholipid phosphatase 4 [Source:UniProtKB/Swiss-Prot;Acc:Q0VBU9]
ENSMUSG00000028618	Tmem59	0.439654895	0.00180116	0.126523726	up	no	63.16252517	46.54415309	6008	5981	5452	5003	4861	5183	63.75195223	65.13075101	60.60487227	43.00396016	45.60237932	51.02611977	Transmembrane protein 59 [Source:UniProtKB/Swiss-Prot;Acc:Q9QY73]
ENSMUSG00000071645	Tut1	0.439122186	0.027947588	0.676642436	up	no	7.328686333	5.379274667	873	831	996	914	675	749	6.932521	6.771997	8.281541	5.881399	4.741267	5.515158	terminal uridylyl transferase 1, U6 snRNA-specific [Source:MGI Symbol;Acc:MGI:1917294]
ENSMUSG00000064201	Krt2	0.439028216	0.129982717	1	up	no	2.876377667	2.095469333	395	283	334	419	220	237	3.292154	2.423625	2.913354	2.830905	1.621395	1.834108	Keratin, type II cytoskeletal 2 epidermal [Source:UniProtKB/Swiss-Prot;Acc:Q3TTY5]
ENSMUSG00000047330	Kcne4	0.438927599	0.195359333	1	up	no	0.56599	0.391289333	60	87	56	53	68	44	0.490591	0.725808	0.481571	0.351175	0.492201	0.330492	Potassium voltage-gated channel subfamily E member 4 [Source:UniProtKB/Swiss-Prot;Acc:Q9WTW3]
ENSMUSG00000037321	Tap1	0.438900345	0.090808183	1	up	no	0.682907515	0.477548277	166	170	172	135	154	129	0.652098835	0.689170768	0.707452941	0.425061322	0.536074761	0.471508748	transporter 1, ATP-binding cassette, sub-family B (MDR/TAP) [Source:MGI Symbol;Acc:MGI:98483]
ENSMUSG00000079505	Gm11131	0.438799683	0.183075281	1	up	no	0.336383333	0.221941	40	63	40	40	41	30	0.273548	0.448705	0.286897	0.221826	0.252521	0.191476	predicted gene 11131 [Source:MGI Symbol;Acc:MGI:3779386]
ENSMUSG00000095334	Gm21984	0.438496088	0.235691911	1	up	no	5.760411	4.224417333	142	287	206	170	265	116	3.763303	7.815265	5.702665	3.642021	6.198751	2.83248	predicted gene 21984 [Source:MGI Symbol;Acc:MGI:5439453]
ENSMUSG00000020173	Cobl	0.438434602	0.051802858	0.862306767	up	no	2.423885966	1.762463466	1125	703	833	627	968	659	3.008742391	1.928068678	2.334846829	1.36122372	2.29086347	1.635303209	Protein cordon-bleu [Source:UniProtKB/Swiss-Prot;Acc:Q5NBX1]
ENSMUSG00000020484	Xbp1	0.438207057	0.028599773	0.682416538	up	no	21.62392938	15.93337365	3610	3180	2661	2324	2384	3373	24.2449791	21.91303563	18.71377341	12.63971336	14.1503108	21.0100968	X-box binding protein 1 [Source:MGI Symbol;Acc:MGI:98970]
ENSMUSG00000026969	Fam166a	0.438113288	0.700133954	1	up	no	1.682330333	1.215536667	130	120	8	7	2	196	2.519964	2.378827	0.1482	0.109324	0.026586	3.5107	Protein FAM166A [Source:UniProtKB/Swiss-Prot;Acc:Q9D4K5]
ENSMUSG00000021171	Esyt2	0.437830146	0.018628853	0.564830726	up	no	4.038412965	2.955159013	1631	1366	1958	1369	1492	1394	3.889542479	3.335394222	4.890302194	2.643107751	3.143460528	3.078908761	Extended synaptotagmin-2 [Source:UniProtKB/Swiss-Prot;Acc:Q3TZZ7]
ENSMUSG00000109812	Gm45640	0.437729026	0.333059427	1	up	no	0.855203333	0.605222667	131	43	48	39	82	60	1.49979	0.497696	0.568124	0.35461	0.824505	0.636553	predicted gene 45640 [Source:MGI Symbol;Acc:MGI:5791476]
ENSMUSG00000025981	Coq10b	0.437482916	0.024212567	0.636722237	up	no	4.02150168	2.94340676	819	806	971	763	837	637	3.708700835	3.745057006	4.610747199	2.801354245	3.352223964	2.676642071	coenzyme Q10B [Source:HGNC Symbol;Acc:HGNC:25819]
ENSMUSG00000054752	Fsd1l	0.437219469	0.135851773	1	up	no	0.653618053	0.45658964	259	354	247	173	373	158	0.575971812	0.806321002	0.578561346	0.30997757	0.735774384	0.324016966	Mus musculus fibronectin type III and SPRY domain containing 1-like (Fsd1l), transcript variant 3, mRNA. [Source:RefSeq mRNA;Acc:NM_001355377]
ENSMUSG00000030727	Rabep2	0.437168711	0.069208356	0.937563238	up	no	1.637467733	1.183263532	347	432	397	403	285	319	1.413483573	1.807493955	1.691425671	1.32808243	1.018183757	1.203524409	Rab GTPase-binding effector protein 2 [Source:UniProtKB/Swiss-Prot;Acc:Q91WG2]
ENSMUSG00000036594	H2-Aa	0.437111997	0.362678069	1	up	no	0.871096149	0.617262968	112	86	24	58	90	36	1.296566463	1.024286636	0.292435347	0.538914152	0.924384918	0.388489836	H-2 class II histocompatibility antigen, A-B alpha chain [Source:UniProtKB/Swiss-Prot;Acc:P14434]
ENSMUSG00000020085	Aifm2	0.437056033	0.06407409	0.91937448	up	no	1.599651463	1.15543114	298	286	311	294	248	218	1.56204396	1.534512392	1.702398036	1.250879665	1.158170116	1.057243638	Apoptosis-inducing factor 2 [Source:UniProtKB/Swiss-Prot;Acc:Q8BUE4]
ENSMUSG00000055775	Myh8	0.436961136	0.036786575	0.749314686	up	no	0.092848925	0.042455366	62	30	56	36	12	32	0.114625153	0.056263454	0.107658167	0.053586456	0.019342293	0.05443735	Myosin-8 [Source:UniProtKB/Swiss-Prot;Acc:P13542]
ENSMUSG00000040761	Spen	0.436946696	0.00415407	0.234252151	up	no	6.206834622	4.558835552	4207	4210	3341	3044	3767	3274	6.515299698	6.68823171	5.416972458	3.817942431	5.155424016	4.703140208	spen family transcription repressor [Source:MGI Symbol;Acc:MGI:1891706]
ENSMUSG00000031568	Rwdd4a	0.436377198	0.040822579	0.780851605	up	no	6.43414266	4.728652879	1122	880	901	788	716	983	7.289949671	5.877744493	6.134733816	4.150785351	4.106938933	5.928234353	RWD domain containing 4A [Source:MGI Symbol;Acc:MGI:2681000]
ENSMUSG00000022246	Rai14	0.43623572	0.135424928	1	up	no	1.356817585	0.976676262	665	493	396	477	611	234	1.706390321	1.296256125	1.067806309	0.991361975	1.385787393	0.55287942	Mus musculus retinoic acid induced 14 (Rai14), transcript variant 3, mRNA. [Source:RefSeq mRNA;Acc:NM_001356534]
ENSMUSG00000011427	Zfp790	0.435220404	0.039726995	0.77466908	up	no	4.662879196	3.422533808	818	712	765	581	630	750	4.871123458	4.343470695	4.774043434	2.801340172	3.319379177	4.146882077	zinc finger protein 790 [Source:MGI Symbol;Acc:MGI:1923431]
ENSMUSG00000097616	1110019D14Rik	0.435167997	0.352005228	1	up	no	0.814773268	0.576573284	22	100	69	54	73	32	0.262324825	1.287293133	0.894701847	0.544629817	0.811469905	0.373620131	RIKEN cDNA 1110019D14 gene [Source:MGI Symbol;Acc:MGI:1923561]
ENSMUSG00000022146	Osmr	0.43469023	0.060108336	0.902012471	up	no	0.512889417	0.353447826	344	281	218	275	230	180	0.61609895	0.514597594	0.407971708	0.399555054	0.362828172	0.297960253	oncostatin M receptor [Source:MGI Symbol;Acc:MGI:1330819]
ENSMUSG00000032238	Rora	0.434604647	0.01518433	0.520546732	up	no	2.532183661	1.847543442	1513	1482	1451	1142	1558	1101	2.524685319	2.536135322	2.535730341	1.540967898	2.298565198	1.70309723	RAR-related orphan receptor alpha [Source:MGI Symbol;Acc:MGI:104661]
ENSMUSG00000039004	Bmp6	0.433914997	0.25393055	1	up	no	4.548692857	3.341196111	973	757	659	702	1143	230	5.442459899	4.346185849	3.857432823	3.178969397	5.653696975	1.190921961	Bone morphotic protein 6 [Source:UniProtKB/Swiss-Prot;Acc:P20722]
ENSMUSG00000028413	B4galt1	0.433404477	0.060915361	0.9036554	up	no	2.634214841	1.924719607	550	462	488	461	512	319	2.833160392	2.439014603	2.63046953	1.922528486	2.330935512	1.520694823	Beta-1,4-galactosyltransferase 1 Lactose synthase A protein N-acetyllactosamine synthase Beta-N-acetylglucosaminylglycopeptide beta-1,4-galactosyltransferase Beta-N-acetylglucosaminyl-glycolipid beta-1,4-galactosyltransferase Processed beta-1,4-galactosyltransferase 1 [Source:UniProtKB/Swiss-Prot;Acc:P15535]
ENSMUSG00000020728	Cep112	0.432865369	0.139809628	1	up	no	0.341066183	0.226736988	107	108	72	62	73	89	0.376410735	0.382007539	0.264780276	0.174981849	0.221405917	0.283823198	Centrosomal protein of 112 kDa [Source:UniProtKB/Swiss-Prot;Acc:Q5PR68]
ENSMUSG00000026579	F5	0.432830568	0.538383415	1	up	no	6.534102667	4.814589	2681	2148	1709	1783	3855	70	7.873823	6.473106	5.255379	4.242651	10.011231	0.189885	Coagulation factor V Coagulation factor V heavy chain Coagulation factor V light chain [Source:UniProtKB/Swiss-Prot;Acc:O88783]
ENSMUSG00000092655	Gm25238	0.432799673	0.290082844	1	up	no	18.880769	13.96138567	97	75	55	74	55	68	23.733223	18.802834	14.10625	14.605495	11.910253	15.368409	predicted gene, 25238 [Source:MGI Symbol;Acc:MGI:5455015]
ENSMUSG00000046794	Ppp1r3b	0.432762847	0.364740841	1	up	no	0.687073811	0.483097077	194	216	167	178	281	25	0.676201544	0.774839148	0.610180742	0.501789047	0.869333871	0.078168314	Protein phosphatase 1 regulatory subunit 3B [Source:UniProtKB/Swiss-Prot;Acc:Q8C767]
ENSMUSG00000092071	A230065N10Rik	0.432563859	0.092799229	1	up	no	7.063096	5.207452	336	315	325	276	347	223	7.126142	6.843801	7.219345	4.733902	6.507699	4.380755	RIKEN cDNA A230065N10 gene [Source:MGI Symbol;Acc:MGI:3642744]
ENSMUSG00000043020	Wdr63	0.432412267	0.287744085	1	up	no	0.846581937	0.601437774	133	126	119	110	172	36	0.871403849	0.851163204	0.817178757	0.584908697	1.002212651	0.217191973	WD repeat domain 63 [Source:MGI Symbol;Acc:MGI:3045269]
ENSMUSG00000022299	Slc25a32	0.432381717	0.025047356	0.644256184	up	no	2.917113097	2.135793677	878	731	778	696	742	613	3.14670445	2.685887465	2.918747376	2.020663046	2.35135506	2.035362926	solute carrier family 25, member 32 [Source:MGI Symbol;Acc:MGI:1917156]
ENSMUSG00000087221	BC037032	0.432378572	0.226356009	1	up	no	0.398454595	0.269374308	225	98	65	91	139	75	0.685143736	0.30595245	0.204267598	0.2227073	0.375147531	0.210268092	cDNA Sequence BC037032 [Source:MGI Symbol;Acc:MGI:3040924]
ENSMUSG00000030340	Scnn1a	0.432142616	0.131538046	1	up	no	1.821540103	1.324169114	336	398	279	416	213	246	1.770728565	2.152618656	1.541273087	1.778515788	0.991965653	1.2020259	sodium channel, nonvoltage-gated 1 alpha [Source:MGI Symbol;Acc:MGI:101782]
ENSMUSG00000087341	0610040F04Rik	0.431804863	0.168445794	1	up	no	1.447903173	1.047512895	134	145	140	96	115	142	1.355279076	1.508227554	1.480202888	0.782162235	1.031642897	1.328733553	RIKEN cDNA 0610040F04 gene [Source:MGI Symbol;Acc:MGI:1922644]
ENSMUSG00000070564	Ntn5	0.431718686	0.140760016	1	up	no	1.848436829	1.344528304	207	173	174	202	145	129	2.028139324	1.736357267	1.780813895	1.607863143	1.255995856	1.169725912	Netrin-5 [Source:UniProtKB/Swiss-Prot;Acc:Q3UQ22]
ENSMUSG00000036112	Metap2	0.431696068	0.004643471	0.253941785	up	no	7.753663056	5.722624712	2942	2489	2552	2421	2500	2005	8.379353036	7.270784486	7.610851645	5.584811483	6.290730218	5.292332435	methionine aminopeptidase 2 [Source:MGI Symbol;Acc:MGI:1929701]
ENSMUSG00000042500	Ago4	0.431455454	0.055103211	0.878612932	up	no	1.486177532	1.076171794	543	432	417	348	438	390	1.702328643	1.388547314	1.367656639	0.883798518	1.212430951	1.132285914	Protein argonaute-4 [Source:UniProtKB/Swiss-Prot;Acc:Q8CJF8]
ENSMUSG00000086593	Gm16548	0.430818047	0.615163673	1	up	no	1.158062	0.833282	89	55	50	18	143	0	1.569328	0.987253	0.917605	0.249156	2.25069	0	predicted gene 16548 [Source:MGI Symbol;Acc:MGI:4414968]
ENSMUSG00000050270	Tmem220	0.430432292	0.332507693	1	up	no	0.660248983	0.464134703	42	58	49	39	70	15	0.543801943	0.768461282	0.668483723	0.410043385	0.802530296	0.179830429	Transmembrane protein 220 [Source:UniProtKB/Swiss-Prot;Acc:Q8BP07]
ENSMUSG00000023484	Prph	0.430416406	0.28187377	1	up	no	0.937032999	0.669527824	134	67	56	82	57	77	1.458399102	0.733314344	0.619385553	0.712541238	0.533171573	0.762870662	peripherin [Source:MGI Symbol;Acc:MGI:97774]
ENSMUSG00000063550	Nup98	0.429908319	0.008391513	0.370703008	up	no	2.784981146	2.041547343	1684	1563	1478	1544	1343	1198	2.910639178	2.771130076	2.673174183	2.160153412	2.048666662	1.915821955	nucleoporin 98 [Source:HGNC Symbol;Acc:HGNC:8068]
ENSMUSG00000013846	St3gal1	0.429876619	0.030491681	0.697983205	up	no	3.961858064	2.915219872	1517	1056	1083	1061	1208	886	4.828844149	3.447868161	3.608861883	2.733090037	3.399674568	2.612895012	ST3 beta-galactoside alpha-2,3-sialyltransferase 1 [Source:MGI Symbol;Acc:MGI:98304]
ENSMUSG00000084838	Gm10241	0.42983843	0.349491511	1	up	no	137.820516	102.284594	1754	1815	1721	2238	367	2032	133.816986	142.110718	137.533844	138.346848	24.716742	143.790192	predicted pseudogene 10241 [Source:MGI Symbol;Acc:MGI:3704461]
ENSMUSG00000034832	Tet3	0.429810268	0.005028663	0.268115454	up	no	3.993805874	2.939075306	2968	3002	2981	2318	2817	2566	3.878270893	4.024829523	4.078317205	2.453813655	3.254255868	3.109156394	Mus musculus tet methylcytosine dioxygenase 3 (Tet3), transcript variant 1, mRNA. [Source:RefSeq mRNA;Acc:NM_001347313]
ENSMUSG00000044258	Ctla2a	0.42947581	0.121355774	1	up	no	2.2654975	1.656456474	220	209	222	188	177	196	2.243283605	2.181985308	2.371223588	1.532903962	1.589665928	1.846799531	Protein CTLA-2-alpha [Source:UniProtKB/Swiss-Prot;Acc:P12399]
ENSMUSG00000025591	Tma16	0.429452991	0.041865256	0.79052617	up	no	1.630480515	1.184956666	555	641	483	509	505	423	1.578745148	1.87367501	1.439021388	1.171675307	1.268268003	1.114926687	Translation machinery-associated protein 16 [Source:UniProtKB/Swiss-Prot;Acc:Q9CR02]
ENSMUSG00000029711	Epo	0.429379412	0.752988944	1	up	no	3.39243	2.493412667	131	262	0	161	0	176	3.322292	6.854998	0	3.318831	0	4.161407	Erythropoietin [Source:UniProtKB/Swiss-Prot;Acc:P07321]
ENSMUSG00000046722	Cdc42se1	0.429247034	0.108339395	1	up	no	21.8607364	16.20912519	3183	3089	3287	3681	1461	3222	21.31183205	21.22739357	23.04298358	19.9702332	8.642701655	20.01444071	CDC42 small effector protein 1 [Source:UniProtKB/Swiss-Prot;Acc:Q8BHL7]
ENSMUSG00000053835	H2-T24	0.428930313	0.117941835	1	up	no	2.348091486	1.718472564	244	255	192	189	203	199	2.438221	2.609424742	1.996628715	1.528828818	1.789830154	1.836758721	_
ENSMUSG00000030966	Trim21	0.428912434	0.223171184	1	up	no	0.774522471	0.549614134	157	111	126	137	144	51	0.905015079	0.657952584	0.760599751	0.640981037	0.736838646	0.271022717	tripartite motif-containing 21 [Source:MGI Symbol;Acc:MGI:106657]
ENSMUSG00000083061	Gm12191	0.428650636	0.151538135	1	up	no	25.46969767	18.89716933	436	403	353	464	394	195	27.309671	25.912916	23.186506	23.539148	21.816797	11.335563	predicted gene 12191 [Source:MGI Symbol;Acc:MGI:3651293]
ENSMUSG00000105355	Gm40117	0.428590463	0.373139548	1	up	no	2.587687333	1.896917667	59	41	31	22	58	31	3.440243	2.463392	1.859427	1.034545	2.999562	1.656646	predicted gene, 40117 [Source:MGI Symbol;Acc:MGI:5623002]
ENSMUSG00000025656	Arhgef9	0.428497146	0.009633138	0.398454939	up	no	38.04480198	28.24293825	15246	14811	14767	17382	11346	10747	37.90140626	37.78051077	38.45248891	35.00942104	24.93713821	24.7822555	Rho guanine nucleotide exchange factor 9 [Source:UniProtKB/Swiss-Prot;Acc:Q3UTH8]
ENSMUSG00000056492	Adgrf5	0.42832491	0.007226993	0.343613977	up	no	4.903386054	3.618136828	2018	2100	1821	1878	1736	1543	4.883899719	5.211894024	4.614364419	3.680682853	3.711751776	3.461975854	Mus musculus adhesion G protein-coupled receptor F5 (Adgrf5), transcript variant 2, mRNA. [Source:RefSeq mRNA;Acc:NM_001357332]
ENSMUSG00000097862	Gm26859	0.428086849	0.250204556	1	up	no	1.502746333	1.091236	154	111	111	92	77	148	1.809199	1.334648	1.364392	0.868986	0.797379	1.607343	predicted gene, 26859 [Source:MGI Symbol;Acc:MGI:5477353]
ENSMUSG00000090164	BC035044	0.428036342	0.317643738	1	up	no	0.591421421	0.413914714	32	35	59	28	52	24	0.43835499	0.488098404	0.847810869	0.305458081	0.630217212	0.306068848	cDNA sequence BC035044 [Source:MGI Symbol;Acc:MGI:2448540]
ENSMUSG00000017007	Rbpjl	0.427847555	0.108620053	1	up	no	0.153109359	0.088153913	46	29	44	20	28	32	0.174299931	0.112476427	0.172551718	0.059347241	0.09327255	0.111841949	recombination signal binding protein for immunoglobulin kappa J region-like [Source:MGI Symbol;Acc:MGI:1196616]
ENSMUSG00000041328	Pcf11	0.427707394	0.009446659	0.396759953	up	no	4.666692905	3.443760953	1559	1680	1665	1457	1498	1299	4.338985588	4.803847529	4.857245599	3.287227556	3.689080436	3.354974866	PCF11 cleavage and polyadenylation factor subunit [Source:HGNC Symbol;Acc:HGNC:30097]
ENSMUSG00000032883	Acsl3	0.427395444	0.001691475	0.123614183	up	no	38.0761849	28.28792679	7326	7382	7552	6518	6892	6011	36.68924946	37.9319978	39.60730742	26.43863812	30.50579434	27.91934792	Long-chain-fatty-acid--CoA ligase 3 [Source:UniProtKB/Swiss-Prot;Acc:Q9CZW4]
ENSMUSG00000090608	Gm17200	0.427354137	0.198458514	1	up	no	1.184582333	0.855246667	118	98	107	74	112	86	1.272216	1.081406	1.200125	0.643136	1.062114	0.86049	predicted gene 17200 [Source:MGI Symbol;Acc:MGI:4938027]
ENSMUSG00000062252	Lhfpl5	0.427311237	0.200012488	1	up	no	2.234424333	1.635986333	120	126	130	131	122	73	2.08661	2.25327	2.363393	1.855157	1.878301	1.174501	LHFPL tetraspan subfamily member 5 protein [Source:UniProtKB/Swiss-Prot;Acc:Q4KL25]
ENSMUSG00000029695	Aass	0.427094808	0.158165885	1	up	no	1.336837981	0.968659747	242	253	191	188	271	127	1.38295811	1.484310436	1.143245396	0.869975463	1.366668668	0.66933511	aminoadipate-semialdehyde synthase [Source:MGI Symbol;Acc:MGI:1353573]
ENSMUSG00000052105	Mtcl1	0.427039426	0.008840297	0.382149385	up	no	3.600714593	2.652541757	1466	1513	1510	1378	1331	1182	3.442227651	3.644949971	3.714966158	2.620951644	2.760208685	2.576464943	Microtubule cross-linking factor 1 [Source:UniProtKB/Swiss-Prot;Acc:Q3UHU5]
ENSMUSG00000032528	Vipr1	0.426438159	0.029692605	0.694377057	up	no	3.575686619	2.635065933	958	1013	821	811	731	866	3.599172574	3.899052169	3.228835113	2.465368199	2.424641145	3.015188454	vasoactive intestinal peptide receptor 1 [Source:MGI Symbol;Acc:MGI:109272]
ENSMUSG00000039607	Rbms3	0.426261454	0.242236168	1	up	no	1.529480569	1.112639476	747	667	729	209	946	639	1.562444595	1.429358353	1.596638758	0.352832818	1.747543676	1.237541935	RNA binding motif, single stranded interacting protein [Source:MGI Symbol;Acc:MGI:2444477]
ENSMUSG00000103567	Pcdhga5	0.426221518	0.076988362	0.959234964	up	no	2.333345	1.710915667	447	535	479	383	368	499	2.090427	2.565154	2.344454	1.44934	1.521536	2.161871	protocadherin gamma subfamily A, 5 [Source:MGI Symbol;Acc:MGI:1935217]
ENSMUSG00000048756	Foxo3	0.42573251	0.004226104	0.237021263	up	no	10.23462011	7.593717952	3821	3436	3158	2932	2879	3220	11.01446971	10.16044975	9.528940858	6.843353041	7.332441741	8.605359074	Forkhead box protein O3 [Source:UniProtKB/Swiss-Prot;Acc:Q9WVH4]
ENSMUSG00000032679	Cd59a	0.425136588	0.232065898	1	up	no	5.588596725	4.136686038	435	450	474	372	651	168	5.235846755	5.555424017	5.974519402	3.622976371	6.919657288	1.867424456	CD59A glycoprotein [Source:UniProtKB/Swiss-Prot;Acc:O55186]
ENSMUSG00000025150	Cbr2	0.425073798	0.257336197	1	up	no	0.928843595	0.66628336	48	65	57	49	49	46	0.75442758	1.074302616	0.957800589	0.632705946	0.695463167	0.670680966	Carbonyl reductase [NADPH] 2 [Source:UniProtKB/Swiss-Prot;Acc:P08074]
ENSMUSG00000025064	Col17a1	0.424684316	0.395102343	1	up	no	0.324710134	0.216409785	91	92	70	38	152	9	0.343539384	0.355232989	0.275358029	0.114907309	0.506227928	0.028094118	Collagen alpha-1(XVII) chain 120 kDa linear IgA disease antigen homolog [Source:UniProtKB/Swiss-Prot;Acc:Q07563]
ENSMUSG00000062127	Cttnbp2nl	0.424574115	0.015739479	0.523482215	up	no	4.249798893	3.140855253	1450	1672	1521	1354	1563	1120	3.887651538	4.592559001	4.269186139	2.93535795	3.701977087	2.785230722	CTTNBP2 N-terminal-like protein [Source:UniProtKB/Swiss-Prot;Acc:Q99LJ0]
ENSMUSG00000032633	Flcn	0.424522127	0.019591816	0.57637156	up	no	9.904791186	7.354424742	1810	2088	1850	1655	1475	1863	9.12822231	10.81462663	9.771524612	6.763350536	6.581571143	8.718352546	Folliculin [Source:UniProtKB/Swiss-Prot;Acc:Q8QZS3]
ENSMUSG00000027281	Slx4ip	0.424229445	0.088083696	0.995492367	up	no	1.115015294	0.805473942	378	272	241	267	259	230	1.389593909	1.027649328	0.927802645	0.798197975	0.841689852	0.776534	Mus musculus SLX4 interacting protein (Slx4ip), transcript variant 6, mRNA. [Source:RefSeq mRNA;Acc:NM_001355671]
ENSMUSG00000058897	Col25a1	0.42422324	0.033689359	0.720047489	up	no	1.634111352	1.192328914	1134	977	744	818	950	674	1.906798041	1.685619343	1.309916672	1.115551455	1.410795892	1.050639394	Collagen alpha-1(XXV) chain Collagen-like Alzheimer amyloid plaque component [Source:UniProtKB/Swiss-Prot;Acc:Q99MQ5]
ENSMUSG00000067158	Col4a4	0.424190605	0.268173506	1	up	no	0.312177617	0.207178141	125	185	136	127	201	24	0.255779454	0.389025391	0.291728005	0.211306921	0.364720547	0.045506955	Collagen alpha-4(IV) chain [Source:UniProtKB/Swiss-Prot;Acc:Q9QZR9]
ENSMUSG00000028906	Epb41	0.423903879	0.019836089	0.57637156	up	no	1.355111437	0.98464713	1161	939	826	925	836	739	1.579289594	1.309853129	1.17619159	1.017239933	1.004966523	0.931734935	erythrocyte membrane protein band 4.1 [Source:MGI Symbol;Acc:MGI:95401]
ENSMUSG00000035112	Wnk4	0.423577892	0.144656986	1	up	no	0.975068558	0.701542417	237	160	151	165	178	119	1.239190343	0.863557896	0.822457436	0.702440895	0.822609427	0.579576928	WNK lysine deficient protein kinase 4 [Source:MGI Symbol;Acc:MGI:1917097]
ENSMUSG00000021779	Thrb	0.422089955	0.047058117	0.83450069	up	no	4.499525847	3.332822329	1551	1497	1433	918	1617	1320	4.564213697	4.517394815	4.416969031	2.186751602	4.20952816	3.602187223	Thyroid hormone receptor beta [Source:UniProtKB/Swiss-Prot;Acc:P37242]
ENSMUSG00000090673	Gm340	0.421705667	0.176648748	1	up	no	0.768411667	0.548305333	166	118	103	93	106	122	0.971366	0.705176	0.628693	0.440042	0.543527	0.661347	_
ENSMUSG00000017291	Taok1	0.421657872	0.178648224	1	up	no	11.42007711	8.500500369	6456	6696	5893	2271	7548	6471	11.34402124	12.0715808	10.84462929	3.231299617	11.72451692	10.54568457	TAO kinase 1 [Source:MGI Symbol;Acc:MGI:1914490]
ENSMUSG00000112919	Gm9049	0.421311321	0.212946343	1	up	no	0.623475333	0.440252	73	59	71	70	45	54	0.654272	0.54246	0.673694	0.513682	0.355109	0.451965	predicted gene 9049 [Source:MGI Symbol;Acc:MGI:3644216]
ENSMUSG00000035011	Zbtb7a	0.421281554	0.003035281	0.18457451	up	no	16.7826815	12.50732774	5299	5546	4509	4604	4412	4397	16.9820548	18.23379992	15.13218979	11.95488987	12.49554966	13.07154369	zinc finger and BTB domain containing 7a [Source:MGI Symbol;Acc:MGI:1335091]
ENSMUSG00000031298	Adgrg2	0.421249036	0.131777848	1	up	no	0.192884387	0.118719561	49	33	56	34	42	24	0.199482545	0.139702184	0.239468433	0.113135613	0.15106543	0.091957641	Adhesion G-protein coupled receptor G2 [Source:UniProtKB/Swiss-Prot;Acc:Q8CJ12]
ENSMUSG00000016239	Lonrf3	0.420796688	0.105243488	1	up	no	2.654969735	1.957995435	503	541	321	338	457	380	2.871395852	3.175980488	1.917532864	1.558485308	2.301247045	2.014253951	LON peptidase N-terminal domain and RING finger protein 3 [Source:UniProtKB/Swiss-Prot;Acc:Q9D4H7]
ENSMUSG00000022512	Cldn1	0.420668056	0.43324188	1	up	no	3.855924667	2.855386667	669	555	462	388	1010	74	4.491926	3.823857	3.251991	2.108404	6.000428	0.457328	Claudin-1 [Source:UniProtKB/Swiss-Prot;Acc:O88551]
ENSMUSG00000071640	Stxbp3-ps	0.4205895	0.306205466	1	up	no	1.392307	1.014931333	49	49	45	50	40	34	1.409435	1.420833	1.346653	1.14886	1.000287	0.895647	_
ENSMUSG00000073514	Dok6	0.420074378	0.077177428	0.959452284	up	no	4.006225321	2.968935695	854	998	916	593	1112	689	3.615252647	4.338425797	4.064997521	2.032175845	4.166825109	2.707806132	Docking protein 6 [Source:UniProtKB/Swiss-Prot;Acc:Q2MHE5]
ENSMUSG00000069206	Zfp874a	0.419906259	0.048744236	0.845090228	up	no	1.706456961	1.250278148	494	511	543	419	509	403	1.591904377	1.691963578	1.835502927	1.094490165	1.451908151	1.204436128	zinc finger protein 874a [Source:MGI Symbol;Acc:MGI:3040703]
ENSMUSG00000051396	Gm45902	0.41981475	0.121529472	1	up	no	1.151783959	0.835734301	210	245	220	177	246	151	1.048293926	1.258427977	1.148629974	0.71964705	1.0857771	0.701778753	_
ENSMUSG00000016206	H2-M3	0.419787215	0.319746077	1	up	no	1.070256667	0.774807667	56	46	105	63	48	66	0.847574	0.708648	1.654548	0.772068	0.63666	0.915695	_
ENSMUSG00000041187	Prkd2	0.419730256	0.101869334	1	up	no	1.088294381	0.788326558	270	241	233	186	218	226	1.154657725	1.058899446	1.051325971	0.642504381	0.829422731	0.893052561	protein kinase D2 [Source:MGI Symbol;Acc:MGI:2141917]
ENSMUSG00000069833	Ahnak	0.419267088	0.04850696	0.844931307	up	no	1.961771123	1.441801568	1764	1786	1342	1172	1945	1087	2.07634172	2.155524585	1.653447063	1.116288905	2.023311641	1.185804158	AHNAK nucleoprotein (desmoyokin) [Source:MGI Symbol;Acc:MGI:1316648]
ENSMUSG00000090317	Gm17324	0.418695948	0.262450865	1	up	no	2.630143333	1.942421667	132	87	108	101	72	110	3.121098	2.107488	2.661844	1.936573	1.488456	2.402236	_
ENSMUSG00000022094	Slc39a14	0.418394665	0.012044087	0.455411818	up	no	3.380322441	2.504174833	1625	1640	1537	1292	1494	1378	3.349573214	3.469348496	3.322045611	2.157663455	2.721785153	2.633075891	solute carrier family 39 (zinc transporter), member 14 [Source:MGI Symbol;Acc:MGI:2384851]
ENSMUSG00000079391	Gm2974	0.418304778	0.387146494	1	up	no	0.481954248	0.335478338	67	31	33	36	15	55	0.728007668	0.342204152	0.375650923	0.318489819	0.138126359	0.549818837	_
ENSMUSG00000069184	Zfp72	0.418165158	0.12565347	1	up	no	1.006358481	0.72797193	215	186	164	144	177	157	1.125943714	0.996852989	0.896278739	0.610273521	0.817653126	0.755989143	zinc finger protein 72 [Source:MGI Symbol;Acc:MGI:3033356]
ENSMUSG00000031309	Rps6ka3	0.417913395	0.139700091	1	up	no	2.205683233	1.625818713	1059	947	477	861	836	462	2.771361802	2.540707038	1.304980858	1.825755253	1.931311631	1.120389255	ribosomal protein S6 kinase polypeptide 3 [Source:MGI Symbol;Acc:MGI:104557]
ENSMUSG00000024235	Map3k8	0.417353195	0.179229709	1	up	no	0.30364367	0.202247221	74	67	48	33	55	57	0.349904627	0.327488923	0.233537461	0.124990859	0.231478541	0.250272262	mitogen-activated protein kinase kinase kinase 8 [Source:MGI Symbol;Acc:MGI:1346878]
ENSMUSG00000085626	Gm12898	0.417280881	0.240900335	1	up	no	4.180298667	3.105236	156	123	84	107	117	92	5.282776	4.277817	2.980303	2.922849	3.515307	2.877552	predicted gene 12898 [Source:MGI Symbol;Acc:MGI:3650325]
ENSMUSG00000087352	Gm12999	0.416838559	0.29799214	1	up	no	3.434016667	2.547205667	87	87	52	74	56	67	3.88473	3.973767	2.443553	2.665708	2.195218	2.780691	predicted gene 12999 [Source:MGI Symbol;Acc:MGI:3651167]
ENSMUSG00000063239	Grm4	0.416815428	0.042353427	0.79520023	up	no	2.725976384	2.016871918	713	635	603	555	634	504	2.921789124	2.66846586	2.587674167	1.841968461	2.295054046	1.913593247	glutamate receptor, metabotropic 4 [Source:MGI Symbol;Acc:MGI:1351341]
ENSMUSG00000091455	Otogl	0.416678496	0.09685081	1	up	no	0.190678	0.117760667	86	63	76	78	42	46	0.213378	0.160543	0.198113	0.156046	0.091545	0.105691	Otogelin-like protein [Source:UniProtKB/Swiss-Prot;Acc:F7A4A7]
ENSMUSG00000028060	2810403A07Rik	0.416611356	0.024441039	0.637163265	up	no	4.52468995	3.364735671	1303	1616	1176	1170	1233	1167	4.218905763	5.372153116	3.98301097	3.064273749	3.529243947	3.500689315	Protein BLOM7 [Source:UniProtKB/Swiss-Prot;Acc:Q3TCX3]
ENSMUSG00000040016	Ptger3	0.416358971	0.18487237	1	up	no	0.421451778	0.29073077	132	134	62	104	85	77	0.49941814	0.519693586	0.245243607	0.317011565	0.284761042	0.270419703	prostaglandin E receptor 3 [Source:HGNC Symbol;Acc:HGNC:9595]
ENSMUSG00000029361	Nos1	0.416143225	0.046752703	0.833208589	up	no	7.650493869	5.708416947	5316	3395	2801	2809	3692	3468	10.40163703	6.811744043	5.738100536	4.448916002	6.385261515	6.291073324	Nitric oxide synthase, brain [Source:UniProtKB/Swiss-Prot;Acc:Q9Z0J4]
ENSMUSG00000028613	Lrp8	0.415938501	0.067208586	0.931750237	up	no	3.960944605	2.943806921	2713	1581	1341	1557	1822	1503	5.621102062	3.357043979	2.904687773	2.613591447	3.334171394	2.883657923	Low-density lipoprotein receptor-related protein 8 [Source:UniProtKB/Swiss-Prot;Acc:Q924X6]
ENSMUSG00000092241	Gm20522	0.415927823	0.258641248	1	up	no	2.097061667	1.546779667	90	77	57	66	76	51	2.480392	2.172714	1.638079	1.481478	1.86236	1.296501	predicted gene 20522 [Source:MGI Symbol;Acc:MGI:5141987]
ENSMUSG00000020734	Grin2c	0.415759895	0.021539957	0.598018194	up	no	7.409658119	5.529424082	1579	1931	1501	1621	1319	1457	6.837378587	8.582453494	6.809142277	5.684081034	5.050509787	5.853681425	Glutamate receptor ionotropic, NMDA 2C [Source:UniProtKB/Swiss-Prot;Acc:Q01098]
ENSMUSG00000047061	Gm9817	0.415480445	0.231945555	1	up	no	0.424102667	0.292956333	48	46	51	32	40	45	0.412448	0.400438	0.459422	0.22098	0.303639	0.35425	_
ENSMUSG00000027171	Prrg4	0.415479131	0.2992997	1	up	no	0.687845783	0.490703486	118	82	95	60	145	42	0.805949407	0.58023565	0.677352291	0.330926646	0.873711229	0.267472581	proline rich Gla (G-carboxyglutamic acid) 4 (transmembrane) [Source:MGI Symbol;Acc:MGI:2442211]
ENSMUSG00000072955	Tmsb15l	0.415433645	0.273158551	1	up	no	2.312438333	1.708832	79	94	82	97	55	71	2.109093	2.554423	2.273799	2.09919	1.285091	1.742215	thymosin beta 15b like [Source:MGI Symbol;Acc:MGI:3026988]
ENSMUSG00000062561	Gm10118	0.415387041	0.219668814	1	up	no	0.572845667	0.404512	55	66	77	62	59	45	0.46095	0.575266	0.682321	0.426339	0.438555	0.348642	_
ENSMUSG00000022528	Hes1	0.415320781	0.061504801	0.904712486	up	no	5.152472527	3.838580954	463	494	459	447	394	398	4.925883345	5.39808891	5.133445325	3.867825244	3.71046173	3.937455889	Transcription factor HES-1 [Source:UniProtKB/Swiss-Prot;Acc:P35428]
ENSMUSG00000087026	A230103J11Rik	0.415137155	0.263211973	1	up	no	1.237564295	0.903103928	103	164	89	81	103	120	1.044342644	1.715346422	0.953003818	0.663089388	0.921988387	1.124234008	RIKEN cDNA A230103J11 gene [Source:MGI Symbol;Acc:MGI:2444082]
ENSMUSG00000046010	Zfp830	0.415046322	0.063875978	0.919100305	up	no	7.185593	5.364161333	474	526	534	485	489	377	6.489979	7.398806	7.667994	5.379393	5.92644	4.786651	zinc finger protein 830 [Source:MGI Symbol;Acc:MGI:1914233]
ENSMUSG00000019254	Ppp1r12c	0.415017323	0.015115157	0.520249264	up	no	16.1802026	12.11032271	3818	3604	3373	4137	2578	2846	16.77656831	16.24707623	15.51696326	14.72622686	10.00799589	11.59674539	Protein phosphatase 1 regulatory subunit 12C [Source:UniProtKB/Swiss-Prot;Acc:Q3UMT1]
ENSMUSG00000063286	Gm8995	0.414319599	0.166747531	1	up	no	0.366011094	0.249682283	108	135	123	69	144	80	0.315534573	0.40450677	0.377991939	0.161528551	0.371289662	0.216228634	_
ENSMUSG00000035164	Zc3h12c	0.413998606	0.04420058	0.810277681	up	no	1.919463776	1.415688895	588	620	557	510	584	435	1.873187278	2.026585311	1.858618738	1.315575766	1.645793357	1.285697563	zinc finger CCCH type containing 12C [Source:MGI Symbol;Acc:MGI:3026959]
ENSMUSG00000055322	Tns1	0.413891352	0.03282487	0.715169662	up	no	3.949095106	2.939234888	2950	2885	2670	2641	3210	1622	4.01605003	4.027681278	3.803554011	2.910217746	3.862209382	2.045277536	tensin 1 [Source:MGI Symbol;Acc:MGI:104552]
ENSMUSG00000037857	Nufip2	0.413860373	0.01888608	0.569351296	up	no	5.840978511	4.359370898	1589	1600	1357	1226	1523	1220	5.985299742	6.184454468	5.353181323	3.740894844	5.072884985	4.264332864	Nuclear fragile X mental retardation-interacting protein 2 [Source:UniProtKB/Swiss-Prot;Acc:Q5F2E7]
ENSMUSG00000034826	Nup54	0.413717242	0.058835755	0.893612574	up	no	4.121604528	3.069102218	613	698	539	624	493	507	3.998121557	4.680368367	3.686323659	3.306658719	2.839190231	3.061457705	Nuclear pore complex protein Nup54 [Source:UniProtKB/Swiss-Prot;Acc:Q8BTS4]
ENSMUSG00000063632	Sox11	0.413589668	0.020286556	0.579001771	up	no	2.645177	1.96095	1001	1003	949	988	835	757	2.626786	2.700721	2.608024	2.101494	1.937699	1.843657	Transcription factor SOX-11 [Source:UniProtKB/Swiss-Prot;Acc:Q7M6Y2]
ENSMUSG00000113450	Zfp935	0.413482299	0.120073265	1	up	no	2.273821198	1.682286137	270	280	254	232	291	178	2.234483851	2.379831085	2.207148659	1.550627696	2.130822151	1.365408565	_
ENSMUSG00000033855	Ston1	0.41317067	0.178494782	1	up	no	0.839885405	0.605826794	183	176	155	94	185	151	0.879795875	0.863439994	0.776420346	0.363594383	0.784790926	0.669095074	Stonin-1 [Source:UniProtKB/Swiss-Prot;Acc:Q8CDJ8]
ENSMUSG00000064336	mt-Tf	0.412532322	0.326101389	1	up	no	19.33876233	14.50440967	61	68	49	41	59	56	19.462317	22.229437	16.324533	10.455913	16.674311	16.383005	mitochondrially encoded tRNA phenylalanine [Source:MGI Symbol;Acc:MGI:102487]
ENSMUSG00000049502	Dtx3l	0.412384147	0.09307999	1	up	no	1.326830303	0.972092669	374	325	324	274	254	345	1.420346836	1.267976696	1.292167379	0.843470465	0.854199415	1.218608127	E3 ubiquitin-protein ligase DTX3L [Source:UniProtKB/Swiss-Prot;Acc:Q3UIR3]
ENSMUSG00000049907	Rasl11b	0.412188318	0.02733931	0.669227522	up	no	30.56002297	22.94047501	2580	3248	3025	2674	2139	2976	26.04661177	33.64351998	31.98993717	21.86632086	19.08602819	27.86907597	Ras-like protein family member 11B [Source:UniProtKB/Swiss-Prot;Acc:Q922H7]
ENSMUSG00000003617	Cp	0.412014008	0.123949057	1	up	no	1.597216684	1.175582984	788	740	549	613	846	342	1.780700524	1.716018296	1.294931233	1.122548791	1.695882504	0.708317657	Ceruloplasmin [Source:UniProtKB/Swiss-Prot;Acc:Q61147]
ENSMUSG00000027306	Nusap1	0.411695061	0.198258497	1	up	no	0.505461558	0.355149439	129	72	78	73	89	67	0.688329232	0.392988677	0.435066765	0.3147824	0.418373649	0.332292269	Nucleolar and spindle-associated protein 1 [Source:UniProtKB/Swiss-Prot;Acc:Q9ERH4]
ENSMUSG00000006134	Crkl	0.411283818	0.007196396	0.343613977	up	no	13.070798	9.803833333	2297	2166	2312	1965	2080	1915	12.977455	12.554688	13.680251	8.990837	10.388421	10.032242	Crk-like protein [Source:UniProtKB/Swiss-Prot;Acc:P47941]
ENSMUSG00000080078	Gm15583	0.411232974	0.1937247	1	up	no	0.770685333	0.554738333	117	122	125	83	140	84	0.724452	0.775682	0.811922	0.417901	0.764561	0.481753	predicted gene 15583 [Source:MGI Symbol;Acc:MGI:3783031]
ENSMUSG00000046962	Zbtb21	0.410984502	0.025121733	0.644256184	up	no	3.301702947	2.458454651	909	843	914	852	728	757	3.297116973	3.136527396	3.471464472	2.500645212	2.330854238	2.543864504	zinc finger and BTB domain containing 21 [Source:MGI Symbol;Acc:MGI:1927240]
ENSMUSG00000051703	Tmem198	0.410860168	0.023733224	0.630963047	up	no	19.15985424	14.38677655	2380	1955	2113	2444	1721	1569	20.73606605	17.47129787	19.2721988	17.24599879	13.24846217	12.66586869	Transmembrane protein 198 [Source:UniProtKB/Swiss-Prot;Acc:Q8BG75]
ENSMUSG00000037820	Tgm2	0.410690837	0.030768095	0.69972847	up	no	4.155309473	3.101112146	980	833	764	830	774	658	4.635616788	4.045625551	3.784686079	3.178725159	3.238391457	2.886219823	Protein-glutamine gamma-glutamyltransferase 2 [Source:UniProtKB/Swiss-Prot;Acc:P21981]
ENSMUSG00000038059	Smim3	0.410469963	0.039794468	0.77466908	up	no	8.525167	6.389388	717	747	805	753	663	590	7.879376	8.421344	9.274781	6.707636	6.441971	6.018557	small integral membrane protein 3 [Source:MGI Symbol;Acc:MGI:1917088]
ENSMUSG00000039985	Fam60a	0.410195338	0.246764484	1	up	no	0.375150538	0.257560984	75	46	89	55	82	35	0.395253284	0.243724517	0.486473812	0.23483169	0.370589736	0.167261527	Mus musculus family with sequence similarity 60, member A (Fam60a), transcript variant 2, mRNA. [Source:RefSeq mRNA;Acc:NM_001355645]
ENSMUSG00000034243	Golgb1	0.409808547	0.007295023	0.344599965	up	no	9.045399633	6.783955003	5503	5089	4774	4113	5410	3967	9.496959907	9.010448294	8.628790699	5.749042955	8.254795741	6.348026313	golgin B1 [Source:HGNC Symbol;Acc:HGNC:4429]
ENSMUSG00000082100	Glns-ps1	0.409343202	0.223563175	1	up	no	2.058594333	1.525348333	100	103	107	88	98	84	1.946065	2.059339	2.170379	1.381355	1.68213	1.51256	glutamine synthetase pseudogene 1 [Source:MGI Symbol;Acc:MGI:95740]
ENSMUSG00000027864	Ptgfrn	0.40927749	0.039509563	0.77466908	up	no	2.129281673	1.578649961	993	1086	915	789	1103	711	2.067905148	2.322218766	1.997721104	1.331305732	2.031156442	1.373487708	prostaglandin F2 receptor negative regulator [Source:MGI Symbol;Acc:MGI:1277114]
ENSMUSG00000075270	Pde11a	0.408982842	0.106885771	1	up	no	2.2766584	1.689990234	628	402	566	406	607	373	2.625480658	1.723775112	2.480719429	1.374929367	2.246674392	1.448366942	Dual 3',5'-cyclic-AMP and -GMP phosphodiesterase 11A [Source:UniProtKB/Swiss-Prot;Acc:P0C1Q2]
ENSMUSG00000026313	Hdac4	0.408748211	0.004952759	0.265510264	up	no	3.858375388	2.881751906	2934	2613	2658	2423	2376	2381	4.043648025	3.696163001	3.835315137	2.704894861	2.895494709	3.044866147	Histone deacetylase 4 [Source:UniProtKB/Swiss-Prot;Acc:Q6NZM9]
ENSMUSG00000041605	5730559C18Rik	0.407922483	0.1278783	1	up	no	0.946861234	0.689027636	225	232	180	197	156	191	0.979701055	1.038171288	0.82271136	0.693919834	0.597674214	0.775488859	innate immunity activator [Source:HGNC Symbol;Acc:HGNC:25599]
ENSMUSG00000061950	Ppp4r1	0.407566505	0.044127288	0.80984506	up	no	3.500384254	2.614307898	995	886	703	678	862	711	3.962352474	3.614075657	2.92472463	2.182437913	3.034718631	2.625767149	protein phosphatase 4 regulatory subunit 1 [Source:HGNC Symbol;Acc:HGNC:9320]
ENSMUSG00000046818	Ddit4l	0.407475804	0.068305193	0.934526082	up	no	3.425186281	2.557783689	458	411	474	422	389	369	3.419440655	3.153302126	3.702816063	2.555261276	2.564023063	2.554066727	DNA damage-inducible transcript 4-like protein [Source:UniProtKB/Swiss-Prot;Acc:Q8VHZ5]
ENSMUSG00000047466	8030462N17Rik	0.407174067	0.061633605	0.904712486	up	no	5.156668	3.864048333	865	748	756	556	753	755	5.519595	4.898932	5.051477	2.875332	4.24879	4.468023	chromosome 18 open reading frame 25 [Source:HGNC Symbol;Acc:HGNC:28172]
ENSMUSG00000106874	Gm20186	0.406962188	0.344286669	1	up	no	1.54555827	1.141096183	66	88	68	97	34	63	1.346758607	1.84602632	1.443889882	1.609486489	0.614613342	1.199188717	predicted gene, 20186 [Source:MGI Symbol;Acc:MGI:5012371]
ENSMUSG00000034177	Rnf43	0.406861326	0.211005626	1	up	no	0.345653348	0.236139624	109	110	91	86	128	37	0.357860516	0.369453723	0.309645805	0.228940328	0.370481179	0.108997366	E3 ubiquitin-protein ligase RNF43 [Source:UniProtKB/Swiss-Prot;Acc:Q5NCP0]
ENSMUSG00000068205	Macrod2	0.406476951	0.175717402	1	up	no	4.249835251	3.181792012	2086	1874	1933	2240	2316	706	4.408515918	4.062087104	4.27890273	3.836465528	4.330276868	1.378633641	O-acetyl-ADP-ribose deacetylase MACROD2 [Source:UniProtKB/Swiss-Prot;Acc:Q3UYG8]
ENSMUSG00000008845	Cd163	0.406213252	0.285551534	1	up	no	0.374922633	0.2583773	55	157	66	47	104	73	0.214601048	0.638027608	0.272139242	0.151865011	0.363309324	0.259957565	Scavenger receptor cysteine-rich type 1 protein M130 Soluble CD163 [Source:UniProtKB/Swiss-Prot;Acc:Q2VLH6]
ENSMUSG00000024308	Tapbp	0.405802937	0.016536008	0.537242075	up	no	9.978135893	7.507139031	1539	1456	1425	1288	1436	1178	10.17951691	9.883423307	9.871467462	6.900129875	8.39104699	7.230240228	TAP binding protein [Source:MGI Symbol;Acc:MGI:1201689]
ENSMUSG00000038729	Akap2	0.405662758	0.03762227	0.75230692	up	no	6.740034845	5.063469974	2796	2333	2275	2678	2468	1444	7.46651236	6.389742857	6.363849318	5.791722724	5.826785758	3.571901439	A-kinase anchor protein 2 [Source:UniProtKB/Swiss-Prot;Acc:O54931]
ENSMUSG00000047959	Kcna3	0.405653028	0.189339446	1	up	no	2.874195667	2.145204	290	232	215	149	295	195	3.326893	2.723354	2.57234	1.381243	2.983122	2.071247	Potassium voltage-gated channel subfamily A member 3 [Source:UniProtKB/Swiss-Prot;Acc:P16390]
ENSMUSG00000030089	Slc41a3	0.405650939	0.160508245	1	up	no	1.157803915	0.849510653	137	168	148	125	157	108	1.026434016	1.289358587	1.157619141	0.758654787	1.039125395	0.750751779	solute carrier family 41, member 3 [Source:MGI Symbol;Acc:MGI:1918949]
ENSMUSG00000071317	Bves	0.405027337	0.139559301	1	up	no	1.20491741	0.885502313	337	219	196	231	224	193	1.588704587	1.060253515	0.965794128	0.878796075	0.93509815	0.842612715	Blood vessel epicardial substance [Source:UniProtKB/Swiss-Prot;Acc:Q9ES83]
ENSMUSG00000037262	Kin	0.405026205	0.114651719	1	up	no	3.744614374	2.803539567	316	304	242	265	262	232	4.033177187	3.96797829	3.232687643	2.735367624	2.939938755	2.735312323	DNA/RNA-binding protein KIN17 [Source:UniProtKB/Swiss-Prot;Acc:Q8K339]
ENSMUSG00000031838	Ifi30	0.40465454	0.247708268	1	up	no	3.061020333	2.287889	118	148	139	162	123	77	2.605873	3.356631	3.220557	2.902576	2.393455	1.567636	interferon gamma inducible protein 30 [Source:MGI Symbol;Acc:MGI:2137648]
ENSMUSG00000022949	Clic6	0.404415751	0.53371938	1	up	no	18.70629025	14.10894597	3710	3369	2767	3171	5512	164	20.68463785	19.27566629	16.1585666	14.31790557	27.16840197	0.840530357	Chloride intracellular channel protein 6 [Source:UniProtKB/Swiss-Prot;Acc:Q8BHB9]
ENSMUSG00000106247	Gm43720	0.403754665	0.322664684	1	up	no	0.173457	0.106703	12	42	94	56	16	39	0.040257	0.145205	0.334909	0.152191	0.04587	0.122048	_
ENSMUSG00000037640	Zfp60	0.40339861	0.069392079	0.93836148	up	no	3.721350265	2.789227668	1410	1363	1428	832	1465	1354	3.659084097	3.627344308	3.877622391	1.748483264	3.361809116	3.257390623	zinc finger protein 60 [Source:MGI Symbol;Acc:MGI:99207]
ENSMUSG00000031139	Mcf2	0.403385992	0.207168449	1	up	no	0.732399808	0.529362247	144	139	162	197	96	92	0.693792289	0.687352489	0.816054645	0.767528332	0.408786021	0.411772388	MCF.2 cell line derived transforming sequence [Source:HGNC Symbol;Acc:HGNC:6940]
ENSMUSG00000097597	Gm26674	0.402878784	0.286668817	1	up	no	0.960751333	0.702296667	62	63	63	44	82	34	0.92983	0.96173	0.990694	0.537678	1.093549	0.475663	predicted gene, 26674 [Source:MGI Symbol;Acc:MGI:5477168]
ENSMUSG00000036492	Rnf39	0.402741519	0.247378857	1	up	no	1.591115165	1.179192506	129	105	153	124	79	133	1.544944126	1.291458331	1.936943039	1.204589713	0.844480208	1.488507598	ring finger protein 39 [Source:MGI Symbol;Acc:MGI:2156378]
ENSMUSG00000037750	Fam222b	0.402247984	0.036982996	0.749314686	up	no	5.926151875	4.459858478	1052	818	912	901	857	706	6.572571042	5.242403854	5.96348073	4.556906869	4.730670431	4.091998134	Protein FAM222B [Source:UniProtKB/Swiss-Prot;Acc:Q6P539]
ENSMUSG00000037938	Chchd5	0.401316075	0.109179058	1	up	no	3.935849353	2.955812975	289	287	339	290	264	256	3.641814111	3.69884362	4.466890328	2.954709086	2.9271338	2.98559604	Coiled-coil-helix-coiled-coil-helix domain-containing protein 5 [Source:UniProtKB/Swiss-Prot;Acc:Q9CQP3]
ENSMUSG00000075602	Ly6a	0.401286246	0.200675433	1	up	no	12.69142685	9.58544981	516	972	572	377	711	710	9.267104397	18.00034629	10.80682988	5.509405878	11.36020576	11.88673779	Lymphocyte antigen 6A-2/6E-1 [Source:UniProtKB/Swiss-Prot;Acc:P05533]
ENSMUSG00000055491	Pprc1	0.401141465	0.05775274	0.890474606	up	no	2.687137009	2.010584307	907	806	1005	868	641	884	2.623870342	2.390931825	3.046608861	2.030770979	1.632192594	2.368789347	Mus musculus peroxisome proliferative activated receptor, gamma, coactivator-related 1 (Pprc1), transcript variant 2, mRNA. [Source:RefSeq mRNA;Acc:NM_001346801]
ENSMUSG00000015354	Pcolce2	0.400867965	0.339507498	1	up	no	2.52977195	1.891795776	577	541	456	516	764	119	2.721348015	2.618406566	2.249561267	1.972344116	3.184599409	0.518443802	Procollagen C-endopeptidase enhancer 2 [Source:UniProtKB/Swiss-Prot;Acc:Q8R4W6]
ENSMUSG00000058248	Kcnh1	0.40079415	0.06584644	0.929725383	up	no	8.207219073	6.192230192	2886	2841	2361	1889	3432	1809	8.587292022	8.674163138	7.360202058	4.55198089	9.031441533	4.993268155	potassium voltage-gated channel subfamily H member 1 [Source:HGNC Symbol;Acc:HGNC:6250]
ENSMUSG00000084925	1810062O18Rik	0.400665906	0.176517373	1	up	no	2.170710468	1.620082614	158	177	201	172	174	127	1.874917492	2.157343404	2.479870508	1.644229288	1.811585303	1.404433251	RIKEN cDNA 1810062O18 gene [Source:MGI Symbol;Acc:MGI:1922852]
ENSMUSG00000038587	Akap12	0.40064899	0.035715099	0.744970109	up	no	3.903174085	2.932474187	1368	1043	983	1032	1095	864	4.620315569	3.612942985	3.4762637	2.823082882	3.268959881	2.7053798	A-kinase anchor protein 12 [Source:UniProtKB/Swiss-Prot;Acc:Q9WTQ5]
ENSMUSG00000097487	Ptges3l	0.400494426	0.192639345	1	up	no	1.695140948	1.259996273	178	122	186	164	147	115	1.81554489	1.275973124	1.993904831	1.370623909	1.327900201	1.081464709	Putative protein PTGES3L [Source:UniProtKB/Swiss-Prot;Acc:Q9D9A7]
ENSMUSG00000022799	Arhgap31	0.400350725	0.018015946	0.555555807	up	no	3.6034537	2.706010827	1860	1890	1647	1590	1843	1328	3.639854629	3.793692741	3.376813732	2.520127907	3.187899159	2.410005416	Rho GTPase activating protein 31 [Source:MGI Symbol;Acc:MGI:1333857]
ENSMUSG00000040723	Rcsd1	0.400283149	0.089522294	1	up	no	0.611965746	0.43946325	274	325	238	197	270	235	0.586206431	0.713987892	0.535702914	0.341387232	0.511083514	0.465919005	RCSD domain containing 1 [Source:MGI Symbol;Acc:MGI:2676394]
ENSMUSG00000021360	Gcnt2	0.39984125	0.057930681	0.890474606	up	no	2.612107891	1.955619611	1003	731	750	677	894	608	3.097308873	2.315597652	2.423417147	1.689631828	2.441121423	1.736105583	N-acetyllactosaminide beta-1,6-N-acetylglucosaminyl-transferase [Source:UniProtKB/Swiss-Prot;Acc:P97402]
ENSMUSG00000005575	Ube2m	0.399781439	0.035717043	0.744970109	up	no	31.23144494	23.64839255	2420	3832	3604	3267	2601	2937	22.38404522	36.37541127	34.93487832	24.48056917	21.2676598	25.19694869	ubiquitin-conjugating enzyme E2M [Source:MGI Symbol;Acc:MGI:108278]
ENSMUSG00000069114	Zbtb10	0.399626651	0.070211282	0.93943618	up	no	1.072325667	0.788686667	379	365	325	286	332	301	1.115621	1.100059	1.001297	0.681665	0.863866	0.820529	zinc finger and BTB domain containing 10 [Source:HGNC Symbol;Acc:HGNC:30953]
ENSMUSG00000040918	Slc19a2	0.399170904	0.05806467	0.890474606	up	no	4.542875603	3.420664428	926	645	775	778	717	585	5.259214246	3.759271915	4.61014065	3.581225149	3.599734075	3.081034061	Thiamine transporter 1 [Source:UniProtKB/Swiss-Prot;Acc:Q9EQN9]
ENSMUSG00000072476	Gm9008	0.399159855	0.250452287	1	up	no	0.402254333	0.280859333	41	45	43	40	31	35	0.373521	0.422291	0.410951	0.29771	0.24728	0.297588	_
ENSMUSG00000042507	Elmsan1	0.399126276	0.025462439	0.64635728	up	no	4.846712386	3.651178056	1612	1862	1485	1369	1684	1327	4.614583445	5.471189079	4.454364633	3.172027989	4.261680343	3.519825835	ELM2 and Myb/SANT domain containing 1 [Source:HGNC Symbol;Acc:HGNC:19853]
ENSMUSG00000029290	Zfp326	0.399086615	0.031498764	0.705130979	up	no	2.55178526	1.910950176	882	765	835	792	744	655	2.654742671	2.363266562	2.637346548	1.931619651	1.977817146	1.82341373	zinc finger protein 326 [Source:MGI Symbol;Acc:MGI:1927246]
ENSMUSG00000036676	Tmtc3	0.399079822	0.070118675	0.938967994	up	no	1.51193232	1.122395679	628	604	590	495	687	404	1.527054148	1.507472426	1.501270386	0.976071032	1.480660105	0.9104559	transmembrane and tetratricopeptide repeat containing 3 [Source:MGI Symbol;Acc:MGI:3036255]
ENSMUSG00000109194	Gm44570	0.399041749	0.207828564	1	up	no	0.645919988	0.465677245	100	137	87	77	97	98	0.583928634	0.824379263	0.529452067	0.365652068	0.502005242	0.529374424	predicted gene 44570 [Source:MGI Symbol;Acc:MGI:5753146]
ENSMUSG00000069893	9930111J21Rik1	0.398975296	0.264042712	1	up	no	0.243422582	0.160450573	52	51	60	16	75	34	0.227566448	0.227018717	0.275682582	0.057149602	0.287862818	0.1363393	RIKEN cDNA 9930111J21 gene 1 [Source:MGI Symbol;Acc:MGI:3041173]
ENSMUSG00000017057	Il13ra1	0.398967265	0.137787784	1	up	no	1.801891	1.342396	406	267	230	284	278	227	2.386449	1.60584	1.413384	1.348253	1.440896	1.238039	Interleukin-13 receptor subunit alpha-1 [Source:UniProtKB/Swiss-Prot;Acc:O09030]
ENSMUSG00000032128	Robo3	0.398866522	0.132321295	1	up	no	0.938729025	0.687828123	218	357	291	284	213	255	0.690824945	1.159938042	0.965424088	0.726125941	0.594268966	0.743089463	roundabout guidance receptor 3 [Source:MGI Symbol;Acc:MGI:1343102]
ENSMUSG00000042406	Atf4	0.398835071	0.02160502	0.598804428	up	no	40.96363811	31.04555714	5624	3610	3773	3847	3858	3814	52.05109267	34.27318677	36.56663489	28.82769618	31.56379839	32.74517686	Cyclic AMP-dependent transcription factor ATF-4 [Source:UniProtKB/Swiss-Prot;Acc:Q06507]
ENSMUSG00000075502	Kbtbd6	0.398378741	0.319307084	1	up	no	1.103444333	0.813065757	156	129	158	175	53	157	1.136332	0.964502	1.209499	1.036025	0.338231271	1.064941	uncharacterized protein LOC432879 [Source:RefSeq peptide;Acc:NP_001030054]
ENSMUSG00000000223	Drp2	0.398327934	0.020857679	0.584050848	up	no	4.016004889	3.022965781	1632	1600	1389	1260	1385	1415	4.157970184	4.185463056	3.704581427	2.600809253	3.122516655	3.345571435	Dystrophin-related protein 2 [Source:UniProtKB/Swiss-Prot;Acc:Q05AA6]
ENSMUSG00000015653	Steap2	0.39822534	0.241325494	1	up	no	1.726917371	1.28624864	1162	847	821	727	1422	334	2.084061281	1.555889832	1.540801	1.053307736	2.254232187	0.551205996	six transmembrane epithelial antigen of prostate 2 [Source:MGI Symbol;Acc:MGI:1921301]
ENSMUSG00000086965	Rtl10	0.397975628	0.329682487	1	up	no	1.916767333	1.43057	76	72	75	66	93	39	1.91554	1.861984	1.972778	1.333234	2.054923	0.903553	_
ENSMUSG00000027861	Casq2	0.397962669	0.220797326	1	up	no	0.594094773	0.426768836	80	73	68	50	70	65	0.631892034	0.595051934	0.555340352	0.31535827	0.491812043	0.473136194	Mus musculus calsequestrin 2 (Casq2), transcript variant 1, mRNA. [Source:RefSeq mRNA;Acc:NM_001355663]
ENSMUSG00000086682	Gm16023	0.397507974	0.244996352	1	up	no	0.788332648	0.574394159	120	79	97	75	115	62	0.945366704	0.634509531	0.78512171	0.47696804	0.799602823	0.446611614	predicted gene 16023 [Source:MGI Symbol;Acc:MGI:3802146]
ENSMUSG00000085360	Arhgap27os2	0.396865073	0.300681356	1	up	no	1.128164	0.832799	84	62	66	75	43	66	1.311914	0.987371	1.085207	0.94874	0.589718	0.959939	Rho GTPase activating protein 27, opposite strand 2 [Source:MGI Symbol;Acc:MGI:3650160]
ENSMUSG00000067714	Lpar5	0.396624626	0.559924361	1	up	no	0.462284939	0.327130458	0	53	44	38	24	20	0	0.764185092	0.622669724	0.424463283	0.301130412	0.255797679	lysophosphatidic acid receptor 5 [Source:HGNC Symbol;Acc:HGNC:13307]
ENSMUSG00000033966	Cdkl4	0.396462587	0.067635794	0.931750237	up	no	6.842761	5.174546	1076	662	957	815	887	691	8.012612	5.052423	7.463248	4.916066	5.835998	4.771574	Cyclin-dependent kinase-like 4 [Source:UniProtKB/Swiss-Prot;Acc:Q3TZA2]
ENSMUSG00000106457	Gm42585	0.396149533	0.268553928	1	up	no	0.275805333	0.185568333	65	63	23	37	55	27	0.347813	0.349603	0.13	0.162703	0.261142	0.13286	predicted gene 42585 [Source:MGI Symbol;Acc:MGI:5662722]
ENSMUSG00000022766	Serpind1	0.396105224	0.274495869	1	up	no	1.033070667	0.761028333	76	103	124	82	118	64	0.756425	1.051303	1.291484	0.655082	1.036429	0.591574	serine (or cysteine) peptidase inhibitor, clade D, member 1 [Source:MGI Symbol;Acc:MGI:96051]
ENSMUSG00000007908	Hmgcll1	0.395957017	0.05755149	0.890474606	up	no	2.3230164	1.74145629	570	527	606	519	517	467	2.273104573	2.159033909	2.536910718	1.675959043	1.82162767	1.726782157	3-hydroxymethyl-3-methylglutaryl-CoA lyase, cytoplasmic [Source:UniProtKB/Swiss-Prot;Acc:Q8JZS7]
ENSMUSG00000069539	Scyl2	0.395901653	0.027307357	0.669227522	up	no	2.330979587	1.747579093	1156	1001	1013	1030	995	777	2.494258303	2.211629389	2.287051068	1.796408689	1.894749848	1.551578742	Mus musculus SCY1-like 2 (S. cerevisiae) (Scyl2), transcript variant 3, mRNA. [Source:RefSeq mRNA;Acc:NM_001358843]
ENSMUSG00000020021	Fgd6	0.395669435	0.040265623	0.774744824	up	no	2.154519823	1.613742984	831	855	701	710	771	618	2.199618672	2.321142516	1.942798281	1.520417629	1.804889704	1.51592162	FYVE, RhoGEF and PH domain-containing protein 6 [Source:UniProtKB/Swiss-Prot;Acc:Q69ZL1]
ENSMUSG00000074166	AW146154	0.395274328	0.296032489	1	up	no	0.445065022	0.314437346	91	127	150	163	50	102	0.318202118	0.460494182	0.556498766	0.463907232	0.148438643	0.330966163	expressed sequence AW146154 [Source:MGI Symbol;Acc:MGI:2142212]
ENSMUSG00000111892	Gm47641	0.395262572	0.433713374	1	up	no	0.388424	0.271373667	56	30	16	11	52	20	0.631381	0.347075	0.186816	0.091373	0.513771	0.208977	predicted gene, 47641 [Source:MGI Symbol;Acc:MGI:6096717]
ENSMUSG00000085941	Gm11201	0.394868086	0.220971766	1	up	no	4.194577667	3.166279333	131	137	128	115	102	132	4.067434	4.372351	4.143948	2.896833	2.789853	3.812152	_
ENSMUSG00000035226	Rims4	0.394747913	0.007455446	0.348245814	up	no	14.07200067	10.67953933	3437	3139	2808	2999	2676	2684	15.115336	14.165433	12.935233	10.682995	10.405172	10.950451	Regulating synaptic membrane exocytosis protein 4 [Source:UniProtKB/Swiss-Prot;Acc:P60191]
ENSMUSG00000029101	Rgs12	0.39474779	0.074972451	0.955612706	up	no	4.880424292	3.688221958	2298	1562	1727	1719	2158	1092	5.899799328	4.108980922	4.632492626	3.571453279	4.896271466	2.596941131	regulator of G-protein signaling 12 [Source:MGI Symbol;Acc:MGI:1918979]
ENSMUSG00000112614	Gm9030	0.394569798	0.260813938	1	up	no	0.673526333	0.488434	83	76	61	71	77	41	0.74576	0.703151	0.571668	0.515336	0.613089	0.336877	predicted gene 9030 [Source:MGI Symbol;Acc:MGI:3646677]
ENSMUSG00000074771	Ankef1	0.394554	0.230320694	1	up	no	0.12456714	0.070833728	30	34	58	23	56	4	0.091047899	0.100417089	0.182236431	0.054422398	0.149613579	0.008465207	Ankyrin repeat and EF-hand domain-containing protein 1 [Source:UniProtKB/Swiss-Prot;Acc:Q9D2J7]
ENSMUSG00000055053	Nfic	0.393989712	0.031085685	0.69972847	up	no	13.0521121	9.909048198	4142	4015	3477	2780	4538	2989	13.62312988	13.5542967	11.97890972	7.404071689	13.20533206	9.11774085	Nuclear factor 1 C-type [Source:UniProtKB/Swiss-Prot;Acc:P70255]
ENSMUSG00000106896	G630022F23Rik	0.393768953	0.211020042	1	up	no	1.072973	0.792795	218	156	151	122	135	192	1.306121	0.963282	0.949516	0.594136	0.713403	1.070846	_
ENSMUSG00000113184	AC125351.1	0.393632343	0.074094019	0.953291103	up	no	5.421385333	4.102937333	591	470	558	473	507	457	5.799024	4.728983	5.736149	3.759911	4.392935	4.155966	_
ENSMUSG00000111497	Raver1	0.392725885	0.345362269	1	up	no	1.00710417	0.743269155	121	370	191	307	107	187	0.517385868	1.641987263	0.861939378	1.074923755	0.404681387	0.750202323	Ribonucleoprotein PTB-binding 1 [Source:UniProtKB/Swiss-Prot;Acc:Q9CW46]
ENSMUSG00000024558	Mapk4	0.392672674	0.016548783	0.537242075	up	no	10.06739404	7.644678642	2506	2452	2344	1988	2601	1906	10.12414251	10.16284869	9.91519093	6.502481669	9.29020983	7.141344429	Mitogen-activated protein kinase 4 [Source:UniProtKB/Swiss-Prot;Acc:Q6P5G0]
ENSMUSG00000002847	Pla1a	0.392637913	0.255813589	1	up	no	0.806315	0.590372333	70	76	68	63	52	69	0.769621	0.862387	0.786937	0.562485	0.508046	0.700586	Phospholipase A1 member A [Source:UniProtKB/Swiss-Prot;Acc:Q8VI78]
ENSMUSG00000079436	Kcnj13	0.392497576	0.62849345	1	up	no	17.63584833	13.41134	1087	1053	871	972	1746	13	18.667973	18.562719	15.676853	13.522203	26.520166	0.191651	Inward rectifier potassium channel 13 [Source:UniProtKB/Swiss-Prot;Acc:P86046]
ENSMUSG00000023277	Twf2	0.391738491	0.050911889	0.85946042	up	no	11.77990461	8.954988798	1265	1314	1100	1407	1003	901	11.8721938	12.65361074	10.8139093	10.69495838	8.327980693	7.84202732	twinfilin actin binding protein 2 [Source:MGI Symbol;Acc:MGI:1346078]
ENSMUSG00000074652	Myh7b	0.391717581	0.097889714	1	up	no	0.975171203	0.719518727	301	256	313	260	242	254	0.985175874	0.863735664	1.07660207	0.688926091	0.70019602	0.76943407	Myosin-7B [Source:UniProtKB/Swiss-Prot;Acc:A2AQP0]
ENSMUSG00000021636	Marveld2	0.391611827	0.254148082	1	up	no	0.378697559	0.264900372	53	53	67	36	66	41	0.335805866	0.350753752	0.449533061	0.186699554	0.366715089	0.241286474	MARVEL domain-containing protein 2 [Source:UniProtKB/Swiss-Prot;Acc:Q3UZP0]
ENSMUSG00000026819	Slc25a25	0.391477676	0.044851342	0.814874373	up	no	6.185013251	4.691369618	1716	2488	2323	1783	2370	1665	4.749350214	7.070309824	6.735379715	3.996545622	5.804346636	4.273216596	Calcium-binding mitochondrial carrier protein SCaMC-2 [Source:UniProtKB/Swiss-Prot;Acc:A2ASZ8]
ENSMUSG00000019278	Dpep1	0.391350885	0.500412462	1	up	no	0.525920568	0.377211463	92	38	48	59	89	4	0.798386184	0.33897796	0.440397559	0.415633191	0.685307916	0.030693282	Dipeptidase 1 [Source:UniProtKB/Swiss-Prot;Acc:P31428]
ENSMUSG00000057637	Prdm2	0.390732248	0.004451491	0.245831614	up	no	11.30169032	8.596552319	3775	3903	3583	3346	3339	3352	11.09958349	11.77197694	11.03351053	7.970199254	8.679026193	9.140431509	PR domain containing 2, with ZNF domain [Source:MGI Symbol;Acc:MGI:107628]
ENSMUSG00000043099	Hic1	0.390544739	0.113214984	1	up	no	1.672557896	1.252180748	297	257	290	268	272	205	1.722477726	1.528920945	1.766275018	1.256041196	1.398639826	1.101861222	HIC ZBTB transcriptional repressor 1 [Source:HGNC Symbol;Acc:HGNC:4909]
ENSMUSG00000000489	Pdgfb	0.390544703	0.019106396	0.571333818	up	no	8.151410445	6.194518587	1649	1499	1413	1402	1373	1294	8.636451636	8.061871487	7.755908213	5.943910622	6.3554627	6.284182439	platelet derived growth factor, B polypeptide [Source:MGI Symbol;Acc:MGI:97528]
ENSMUSG00000037348	Paqr7	0.39049057	0.25170876	1	up	no	12.46719684	9.48713941	3164	1426	2554	1590	1393	3277	16.21293521	7.486875374	13.70177992	6.593454039	6.299268827	15.56869536	Membrane progestin receptor alpha [Source:UniProtKB/Swiss-Prot;Acc:Q80ZE4]
ENSMUSG00000026241	Nppc	0.390364522	0.282036207	1	up	no	2.515385667	1.895374	149	100	105	90	98	122	3.11106	2.146492	2.288605	1.525997	1.798276	2.361849	natriuretic peptide type C [Source:MGI Symbol;Acc:MGI:97369]
ENSMUSG00000049382	Krt8	0.390318106	0.520832307	1	up	no	1.822046667	1.366447333	173	158	149	154	263	12	1.92332	1.806041	1.736779	1.387732	2.58822	0.12339	Keratin, type II cytoskeletal 8 [Source:UniProtKB/Swiss-Prot;Acc:P11679]
ENSMUSG00000027367	Stard7	0.390147908	0.067414757	0.931750237	up	no	16.40688497	12.49560121	3763	4164	4328	3443	2663	4774	14.73661479	16.73209462	17.75194549	10.92014744	9.219916538	17.34673964	START domain containing 7 [Source:MGI Symbol;Acc:MGI:2139090]
ENSMUSG00000024211	Grm8	0.38979147	0.159678423	1	up	no	0.735258747	0.537502816	315	226	438	301	355	193	0.688932718	0.508136227	1.008707296	0.533751377	0.688092637	0.390664435	glutamate receptor, metabotropic 8 [Source:MGI Symbol;Acc:MGI:1351345]
ENSMUSG00000104344	Gm38077	0.389642196	0.288396727	1	up	no	0.377123	0.264197	39	56	70	49	63	25	0.258918	0.383556	0.488895	0.266764	0.370268	0.155559	predicted gene, 38077 [Source:MGI Symbol;Acc:MGI:5611305]
ENSMUSG00000053012	Krcc1	0.389473279	0.14721225	1	up	no	5.76349339	4.376239347	479	515	488	591	304	438	5.460572203	6.004722113	5.825185854	5.457824778	3.042089129	4.628804134	Lysine-rich coiled-coil protein 1 [Source:UniProtKB/Swiss-Prot;Acc:Q99JT5]
ENSMUSG00000036959	Bcorl1	0.389442777	0.030224478	0.696702005	up	no	2.897516796	2.188377495	1099	1188	1027	1036	1074	837	2.816430992	3.122036637	2.754082761	2.148994744	2.429003994	1.987133745	BCL-6 corepressor-like protein 1 [Source:UniProtKB/Swiss-Prot;Acc:A2AQH4]
ENSMUSG00000018470	Kcnab3	0.389374724	0.034120189	0.725068441	up	no	9.045344897	6.882108881	1084	1189	1206	1103	969	1038	8.24338791	9.287032914	9.605613867	6.799412734	6.522300068	7.324613839	potassium voltage-gated channel subfamily A regulatory beta subunit 3 [Source:HGNC Symbol;Acc:HGNC:6230]
ENSMUSG00000000791	Il12rb1	0.389264978	0.375427981	1	up	no	0.258115066	0.173427479	21	45	79	60	50	7	0.101120457	0.240681111	0.432543629	0.256877164	0.230194652	0.03321062	Interleukin-12 receptor subunit beta-1 [Source:UniProtKB/Swiss-Prot;Acc:Q60837]
ENSMUSG00000075316	Scn9a	0.389175222	0.068666693	0.93556149	up	no	0.132879923	0.077819192	94	60	77	49	76	33	0.158967003	0.10385006	0.135822706	0.067735133	0.113569365	0.052153079	Sodium channel protein type 9 subunit alpha [Source:UniProtKB/Swiss-Prot;Acc:Q62205]
ENSMUSG00000005057	Sh2b2	0.388780967	0.135809294	1	up	no	1.016321107	0.752617816	282	265	198	245	235	170	1.128201941	1.090603868	0.830157513	0.792477393	0.834732834	0.630643222	SH2B adaptor protein 2 [Source:MGI Symbol;Acc:MGI:1345171]
ENSMUSG00000020346	Mgat1	0.38861141	0.122597095	1	up	no	5.9796085	4.543996915	1023	1863	922	1256	1109	1046	4.702799487	8.79820047	4.437825544	4.671792875	4.50063224	4.45956563	Alpha-1,3-mannosyl-glycoprotein 2-beta-N-acetylglucosaminyltransferase [Source:UniProtKB/Swiss-Prot;Acc:P27808]
ENSMUSG00000037992	Rara	0.388112794	0.074180944	0.953291103	up	no	3.75695194	2.847206962	634	876	693	628	623	703	3.164268054	4.486319293	3.620268472	2.539277596	2.749143212	3.253200079	retinoic acid receptor, alpha [Source:MGI Symbol;Acc:MGI:97856]
ENSMUSG00000057137	Tmem140	0.388079721	0.1521091	1	up	no	0.716027841	0.523564438	150	191	222	171	172	144	0.557088973	0.726964929	0.864029621	0.512972581	0.562483803	0.495236931	Transmembrane protein 140 [Source:UniProtKB/Swiss-Prot;Acc:Q8BGY5]
ENSMUSG00000055866	Per2	0.388034717	0.015736784	0.523482215	up	no	7.914149855	6.02417186	1929	2185	2101	1862	1886	1806	7.189616748	8.354533386	8.198299429	5.619153216	6.211472651	6.241889714	period circadian regulator 2 [Source:HGNC Symbol;Acc:HGNC:8846]
ENSMUSG00000007476	Lrrc8a	0.387807263	0.017448661	0.547690146	up	no	9.806513434	7.47145271	1901	1969	1802	1784	1823	1477	9.627455682	10.23422441	9.557860209	7.317065509	8.161027314	6.936265308	Volume-regulated anion channel subunit LRRC8A [Source:UniProtKB/Swiss-Prot;Acc:Q80WG5]
ENSMUSG00000047757	Fancb	0.387791694	0.230958853	1	up	no	0.485777764	0.347709129	75	54	69	62	44	59	0.543228257	0.398923836	0.5151812	0.366378163	0.283738357	0.393010868	Fanconi anemia group B protein homolog isoform 2 [Source:RefSeq peptide;Acc:NP_778192]
ENSMUSG00000024403	Atp6v1g2	0.387389059	0.024866701	0.643167833	up	no	95.29093078	72.82750567	13022	8324	10807	10290	8533	9972	113.2185084	74.25902125	98.39526267	72.46803997	65.59237503	80.42210201	ATPase, H+ transporting, lysosomal V1 subunit G2 [Source:MGI Symbol;Acc:MGI:1913487]
ENSMUSG00000097284	4930480K23Rik	0.387328077	0.363441759	1	up	no	0.493545942	0.353792142	52	60	137	119	53	44	0.298774806	0.354431138	0.827431882	0.555676038	0.270697893	0.235002494	RIKEN cDNA 4930480K23 gene [Source:MGI Symbol;Acc:MGI:1922266]
ENSMUSG00000026848	Tor1b	0.386976179	0.200034319	1	up	no	3.209451041	2.430839029	533	1240	525	741	720	591	2.179975572	5.206846298	2.241531254	2.451735834	2.600959628	2.239821624	Torsin-1B [Source:UniProtKB/Swiss-Prot;Acc:Q9ER41]
ENSMUSG00000053470	Kdm3a	0.386620109	0.022529521	0.615093254	up	no	3.809736979	2.890634177	1370	1447	1405	1411	1240	1122	3.622702066	3.925809889	3.880698981	3.02179548	2.897549027	2.752558025	Lysine-specific demethylase 3A [Source:UniProtKB/Swiss-Prot;Acc:Q6PCM1]
ENSMUSG00000056962	Jmjd6	0.386411328	0.039745059	0.77466908	up	no	4.883149453	3.712259999	1033	922	1128	1018	878	869	4.792868032	4.385930292	5.470650035	3.817519551	3.591336026	3.72792442	Bifunctional arginine demethylase and lysyl-hydroxylase JMJD6 [Source:UniProtKB/Swiss-Prot;Acc:Q9ERI5]
ENSMUSG00000029759	Pon3	0.386411328	0.427647225	1	up	no	1.579503998	1.184871339	310	198	218	124	452	61	1.976818712	1.301228431	1.460464852	0.639398979	2.564884942	0.350330097	Serum paraoxonase/lactonase 3 [Source:UniProtKB/Swiss-Prot;Acc:Q62087]
ENSMUSG00000091845	Rpl36-ps12	0.385279508	0.520957016	1	up	no	2.695485	2.040309	44	63	35	11	82	32	2.461397	3.613272	2.011786	0.484785	4.016499	1.619643	ribosomal protein L36, pseudogene 12 [Source:MGI Symbol;Acc:MGI:3782787]
ENSMUSG00000045282	Tmem86b	0.385213266	0.305844889	1	up	no	1.180819734	0.880679874	98	114	96	56	114	98	1.105195599	1.312816261	1.124447343	0.495906932	1.128496777	1.017635914	Lysoplasmalogenase [Source:UniProtKB/Swiss-Prot;Acc:Q497J1]
ENSMUSG00000090863	A530084C06Rik	0.385087284	0.205801058	1	up	no	1.189095667	0.887102667	183	184	145	196	154	104	1.243858	1.287788	1.035641	1.080736	0.924617	0.655955	RIKEN cDNA A530084C06 gene [Source:MGI Symbol;Acc:MGI:3704402]
ENSMUSG00000021820	Camk2g	0.385036599	0.079893949	0.965483237	up	no	19.09396132	14.59795961	6658	6164	3666	4400	6473	3854	22.67407882	21.53584586	13.07195927	12.13610224	19.4884224	12.16935418	Calcium/calmodulin-dependent protein kinase type II subunit gamma [Source:UniProtKB/Swiss-Prot;Acc:Q923T9]
ENSMUSG00000042359	Osbpl6	0.384902489	0.051843325	0.862306767	up	no	7.040960325	5.368767064	3031	3015	3459	3288	2022	3213	6.565929579	6.70502103	7.851930367	5.774021083	3.871396832	6.460883277	Oxysterol-binding protein-related protein 6 [Source:UniProtKB/Swiss-Prot;Acc:Q8BXR9]
ENSMUSG00000056031	9330154J02Rik	0.384668745	0.244010641	1	up	no	0.594043646	0.431606095	149	91	87	113	105	62	0.79980086	0.497870653	0.484459425	0.489376522	0.499184763	0.306257001	RIKEN cDNA 9330154J02 gene [Source:MGI Symbol;Acc:MGI:3045244]
ENSMUSG00000039531	Zufsp	0.383758798	0.126314509	1	up	no	0.519561153	0.374855278	172	216	250	200	190	156	0.410751255	0.525199291	0.622732913	0.3840435	0.397332855	0.343189481	zinc finger with UFM1-specific peptidase domain [Source:MGI Symbol;Acc:MGI:1919830]
ENSMUSG00000109829	Gm45605	0.383667578	0.203792714	1	up	no	0.609749333	0.444013333	120	104	127	129	91	82	0.611859	0.54067	0.676719	0.531955	0.41133	0.388755	predicted gene 45605 [Source:MGI Symbol;Acc:MGI:5791441]
ENSMUSG00000025019	Lcor	0.38358144	0.168961252	1	up	no	0.953909657	0.707855833	354	383	244	192	382	270	1.011425432	1.120991665	0.729311875	0.445112963	0.965627607	0.712826927	ligand dependent nuclear receptor corepressor [Source:MGI Symbol;Acc:MGI:2443930]
ENSMUSG00000019942	Cdk1	0.383468929	0.381570751	1	up	no	0.207791586	0.135950604	8	83	50	36	59	14	0.035213179	0.366811696	0.221349884	0.126615415	0.225219727	0.05601667	Cyclin-dependent kinase 1 [Source:UniProtKB/Swiss-Prot;Acc:P11440]
ENSMUSG00000022462	Slc38a2	0.383398679	0.007456273	0.348245814	up	no	12.25175483	9.369218982	4683	5319	4532	4195	4715	4116	11.56261859	13.47476404	11.71788186	8.388972522	10.29245928	9.426225146	Sodium-coupled neutral amino acid transporter 2 [Source:UniProtKB/Swiss-Prot;Acc:Q8CFE6]
ENSMUSG00000073412	Lst1	0.38306184	0.378702767	1	up	no	2.067311333	1.561912667	44	41	32	27	36	39	2.27946	2.211208	1.711266	1.144065	1.6677	1.873973	_
ENSMUSG00000097258	Gm26767	0.382846748	0.333251578	1	up	no	0.194863667	0.126137667	29	36	52	8	59	22	0.140845	0.179464	0.264282	0.030179	0.251709	0.096525	predicted gene, 26767 [Source:MGI Symbol;Acc:MGI:5477261]
ENSMUSG00000052291	5330438D12Rik	0.382784244	0.378994641	1	up	no	1.609279282	1.210942036	205	178	168	203	55	226	1.763443385	1.562480052	1.50191441	1.414754304	0.414793281	1.803278522	RIKEN cDNA 5330438D12 gene [Source:MGI Symbol;Acc:MGI:3026931]
ENSMUSG00000020846	Rflnb	0.382647795	0.08530649	0.982427169	up	no	4.051941	3.084657333	565	611	731	671	562	485	3.505224	3.894144	4.756455	3.377467	3.08302	2.793485	Refilin-B [Source:UniProtKB/Swiss-Prot;Acc:Q5SVD0]
ENSMUSG00000085829	Gm4285	0.382371964	0.401544989	1	up	no	1.387035333	1.040816667	52	47	69	78	43	31	1.255528	1.166661	1.738917	1.519526	0.918653	0.684271	predicted gene 4285 [Source:MGI Symbol;Acc:MGI:3782463]
ENSMUSG00000055489	Ano5	0.382180579	0.175854599	1	up	no	0.173100244	0.109543537	90	42	54	28	52	56	0.248866141	0.114126326	0.156308265	0.05938934	0.126493043	0.142748229	Anoctamin-5 [Source:UniProtKB/Swiss-Prot;Acc:Q75UR0]
ENSMUSG00000015957	Wnt11	0.382013856	0.341848877	1	up	no	0.238237136	0.159551569	13	67	54	42	34	32	0.063311869	0.354641613	0.296757925	0.173247755	0.148871528	0.156535425	wingless-type MMTV integration site family, member 11 [Source:MGI Symbol;Acc:MGI:101948]
ENSMUSG00000032372	Plscr2	0.381808994	0.348780357	1	up	no	0.838815649	0.620517212	118	115	131	108	174	37	0.793631085	0.79878324	0.924032622	0.595457956	1.040981288	0.225112394	Phospholipid scramblase 2 [Source:UniProtKB/Swiss-Prot;Acc:Q9DCW2]
ENSMUSG00000052942	Glis3	0.381481078	0.183877773	1	up	no	1.318062525	0.988574441	553	489	529	268	695	406	1.357289418	1.23390084	1.362997318	0.527116412	1.51390354	0.924703371	Zinc finger protein GLIS3 [Source:UniProtKB/Swiss-Prot;Acc:Q6XP49]
ENSMUSG00000073805	Fam196a	0.381278814	0.11092525	1	up	no	1.41415509	1.062502783	518	334	379	381	337	366	1.748296424	1.15269654	1.341472307	1.03945712	1.002344513	1.145706717	family with sequence similarity 196 member A [Source:HGNC Symbol;Acc:HGNC:33859]
ENSMUSG00000051977	Prdm9	0.381193926	0.211663628	1	up	no	0.282709847	0.193845355	68	54	46	34	47	52	0.331178297	0.277721788	0.239229456	0.134153323	0.208738659	0.238644084	PR domain containing 9 [Source:MGI Symbol;Acc:MGI:2384854]
ENSMUSG00000047264	Zfp358	0.381189562	0.045187902	0.81734432	up	no	10.55380317	8.080035279	1141	1296	1046	1221	965	958	10.13340766	11.8074346	9.720567252	8.781727946	7.568422516	7.889955375	zinc finger protein 358 [Source:MGI Symbol;Acc:MGI:2153740]
ENSMUSG00000022601	Zbtb11	0.381057416	0.009875882	0.405408681	up	no	7.866644156	6.017383491	2687	2494	2675	2440	2414	2206	7.880947787	7.503152071	8.215832609	5.7980417	6.257428678	5.996680096	zinc finger and BTB domain containing 11 [Source:MGI Symbol;Acc:MGI:2443876]
ENSMUSG00000044339	Alkbh2	0.381017227	0.262167099	1	up	no	2.227661702	1.68740203	127	100	112	128	95	79	2.458495503	1.975579718	2.248909883	2.017080413	1.627767321	1.417358354	DNA oxidative demethylase ALKBH2 [Source:UniProtKB/Swiss-Prot;Acc:Q6P6J4]
ENSMUSG00000064208	Gm10145	0.380574878	0.578056504	1	up	no	5.663466667	4.3271	36	91	221	215	77	36	1.684961	4.370814	10.934625	8.208649	3.199147	1.573504	predicted gene 10145 [Source:MGI Symbol;Acc:MGI:3704353]
ENSMUSG00000017009	Sdc4	0.38057089	0.007231981	0.343613977	up	no	29.96631438	22.99494546	3358	3637	3249	3131	3365	2739	28.77156554	31.97217492	29.15520269	21.72845268	25.4884988	21.76788491	syndecan 4 [Source:MGI Symbol;Acc:MGI:1349164]
ENSMUSG00000079487	Med12	0.380516319	0.029865061	0.694377057	up	no	3.642333133	2.774720452	1193	1335	1245	1185	1202	996	3.37227208	3.866629451	3.688097867	2.710482141	3.002898176	2.610781038	Mediator of RNA polymerase II transcription subunit 12 [Source:UniProtKB/Swiss-Prot;Acc:A2AGH6]
ENSMUSG00000013523	Bcas1	0.380405405	0.122980062	1	up	no	44.08118371	33.84094344	4913	9604	7748	5049	8870	6074	28.39047884	56.95807383	46.89499844	23.63575909	45.32622646	32.56084477	Breast carcinoma-amplified sequence 1 homolog [Source:UniProtKB/Swiss-Prot;Acc:Q80YN3]
ENSMUSG00000024913	Lrp5	0.380322732	0.054837346	0.876161013	up	no	2.039988132	1.544079501	820	893	953	723	983	662	1.834449418	2.050624376	2.234890603	1.311226901	1.946887576	1.374124026	Low-density lipoprotein receptor-related protein 5 [Source:UniProtKB/Swiss-Prot;Acc:Q91VN0]
ENSMUSG00000109876	Gm45449	0.379996042	0.141607163	1	up	no	3.134565667	2.385568667	289	278	259	221	293	222	3.21743	3.16701	3.019257	1.991557	2.877822	2.287327	predicted gene 45449 [Source:MGI Symbol;Acc:MGI:5791285]
ENSMUSG00000101932	Gm10074	0.379963374	0.415823926	1	up	no	4.177017333	3.186704333	39	59	42	40	56	31	3.409313	5.270778	3.850961	2.825607	4.262762	2.471744	predicted gene 10074 [Source:MGI Symbol;Acc:MGI:3708632]
ENSMUSG00000017607	Tns4	0.37959637	0.409155626	1	up	no	0.227843853	0.151998034	81	32	49	8	101	14	0.333166462	0.138299214	0.212065885	0.025367055	0.376293786	0.05433326	Tensin-4 [Source:UniProtKB/Swiss-Prot;Acc:Q8BZ33]
ENSMUSG00000036264	Fstl4	0.379489474	0.090331964	1	up	no	2.687335333	2.042651333	585	528	471	454	434	517	2.910645	2.697402	2.453959	1.82903	1.910074	2.38885	Follistatin-related protein 4 [Source:UniProtKB/Swiss-Prot;Acc:Q5STE3]
ENSMUSG00000085917	Gm15899	0.3793337	0.381580483	1	up	no	6.665173333	5.101015	53	61	99	69	79	45	4.815358	5.730194	9.449968	5.109095	6.369415	3.824535	predicted gene 15899 [Source:MGI Symbol;Acc:MGI:3801945]
ENSMUSG00000043298	Smco3	0.378785852	0.28667722	1	up	no	3.701286619	2.823510874	273	428	441	505	179	353	2.581367275	4.153567191	4.368925389	3.873224687	1.500163401	3.097144536	Single-pass membrane and coiled-coil domain-containing protein 3 [Source:UniProtKB/Swiss-Prot;Acc:Q8BQM7]
ENSMUSG00000059493	Nhs	0.378681491	0.222422748	1	up	no	0.466796099	0.335945667	208	172	174	156	241	74	0.513499298	0.435829	0.45106	0.313013	0.526614	0.16821	NHS actin remodeling regulator [Source:HGNC Symbol;Acc:HGNC:7820]
ENSMUSG00000033618	Map3k13	0.378335238	0.048286928	0.844931307	up	no	4.023988	3.072686333	1229	1256	1141	963	1054	1210	3.996439	4.19086	3.884665	2.53606	3.031023	3.650976	Mitogen-activated protein kinase kinase kinase 13 [Source:UniProtKB/Swiss-Prot;Acc:Q1HKZ5]
ENSMUSG00000038780	Smurf1	0.378332966	0.01986337	0.57637156	up	no	8.807945247	6.753114184	2303	2847	2343	2521	2108	2136	7.925556301	10.05550015	8.44277929	7.028860833	6.411214907	6.819266814	E3 ubiquitin-protein ligase SMURF1 [Source:UniProtKB/Swiss-Prot;Acc:Q9CUN6]
ENSMUSG00000055494	Gm14168	0.378329583	0.311967708	1	up	no	0.8462	0.627938	88	76	87	78	104	39	0.87043	0.770429	0.897741	0.620638	0.907965	0.355211	_
ENSMUSG00000018541	Cwc25	0.378269772	0.044669123	0.813377321	up	no	4.23166916	3.232611826	915	1093	868	933	824	825	3.944614055	4.830535773	3.919857651	3.25571238	3.141081623	3.301041476	Pre-mRNA-splicing factor CWC25 homolog [Source:UniProtKB/Swiss-Prot;Acc:Q9DBF7]
ENSMUSG00000089774	Slc5a3	0.377842074	0.027069038	0.669227522	up	no	3.291039333	2.509702667	1767	1564	1495	1484	1636	1205	3.533585	3.209055	3.130478	2.40318	2.891467	2.234461	Sodium/myo-inositol cotransporter [Source:UniProtKB/Swiss-Prot;Acc:Q9JKZ2]
ENSMUSG00000062510	Nsl1	0.377779064	0.332988703	1	up	no	0.2037554	0.133776675	32	25	88	23	62	29	0.131709999	0.101247392	0.378308809	0.073438932	0.22099403	0.106897063	NSL1, MIS12 kinetochore complex component [Source:HGNC Symbol;Acc:HGNC:24548]
ENSMUSG00000062382	Ftl1-ps1	0.377435006	0.337129876	1	up	no	1.854652622	1.404701411	70	111	124	64	117	90	1.232914284	2.018199419	2.312844164	0.903451341	1.843192242	1.46746065	_
ENSMUSG00000027351	Spred1	0.377227327	0.007226637	0.343613977	up	no	18.64022095	14.32839311	5472	5610	5878	5075	5035	5176	17.60098441	18.51719022	19.80248822	13.22275854	14.31813903	15.44428176	Sprouty-related, EVH1 domain-containing protein 1 [Source:UniProtKB/Swiss-Prot;Acc:Q924S8]
ENSMUSG00000097610	A930012L18Rik	0.376772215	0.321766179	1	up	no	0.71412395	0.527004695	115	70	56	90	73	48	1.004471381	0.62471014	0.513190329	0.640753754	0.555347303	0.384913027	RIKEN cDNA A930012L18 gene [Source:MGI Symbol;Acc:MGI:2442887]
ENSMUSG00000041075	Fzd7	0.376561731	0.159037926	1	up	no	3.148436667	2.402177	614	686	616	548	825	350	2.95401	3.386081	3.105219	2.134799	3.51064	1.561092	Frizzled-7 [Source:UniProtKB/Swiss-Prot;Acc:Q61090]
ENSMUSG00000046719	Nxph3	0.376488436	0.069553744	0.93836148	up	no	11.923273	9.161650667	1303	865	1194	1147	1067	832	13.544503	9.227835	12.997481	9.659527	9.802187	8.023238	Neurexophilin-3 [Source:UniProtKB/Swiss-Prot;Acc:Q91VX5]
ENSMUSG00000038630	Zkscan16	0.375920692	0.06706393	0.931750237	up	no	8.563057333	6.575868667	1306	914	999	950	1154	794	10.201332	7.320083	8.167757	6.007829	7.967166	5.752611	zinc finger with KRAB and SCAN domains 16 [Source:MGI Symbol;Acc:MGI:3510405]
ENSMUSG00000087141	Plcxd2	0.375876805	0.029953186	0.694377057	up	no	5.962357333	4.571876333	2184	1989	1554	1749	1759	1634	6.675307	6.236754	4.975011	4.329986	4.753026	4.632617	PI-PLC X domain-containing protein 2 [Source:UniProtKB/Swiss-Prot;Acc:B2RXA1]
ENSMUSG00000002028	Kmt2a	0.375674833	0.012681868	0.468653979	up	no	7.477584911	5.74038421	5778	5904	5061	4473	5775	4774	7.563568724	7.929996317	6.939189692	4.742792886	6.682002719	5.796357026	Mus musculus lysine (K)-specific methyltransferase 2A (Kmt2a), transcript variant 1, mRNA. [Source:RefSeq mRNA;Acc:NM_001357549]
ENSMUSG00000085795	Zfp703	0.375516243	0.047647904	0.840387325	up	no	7.196884121	5.524653798	1097	1254	932	1075	992	896	7.054610563	8.27305252	6.262989281	5.593333559	5.638302511	5.342325324	zinc finger protein 703 [Source:MGI Symbol;Acc:MGI:2662729]
ENSMUSG00000029344	Tpst2	0.375440855	0.17972061	1	up	no	7.090019724	5.442569185	604	866	1181	590	1040	755	4.701551244	6.926292132	9.642215796	3.728011782	7.16065248	5.439043293	protein-tyrosine sulfotransferase 2 [Source:MGI Symbol;Acc:MGI:1309516]
ENSMUSG00000024427	Spry4	0.375341094	0.042797803	0.798941341	up	no	4.231790333	3.239477333	896	811	899	867	793	690	4.25967	3.959042	4.476659	3.341728	3.331855	3.044849	4 [Source:UniProtKB/Swiss-Prot;Acc:Q9WTP2]
ENSMUSG00000022973	Synj1	0.375251541	0.072066831	0.945434597	up	no	45.9470979	35.40097612	19937	14905	15126	10260	17695	16602	53.81248404	41.27214181	42.75666786	22.42892265	42.22079005	41.55321566	synaptojanin 1 [Source:HGNC Symbol;Acc:HGNC:11503]
ENSMUSG00000087041	Gm16295	0.375195363	0.160413697	1	up	no	12.11689033	9.319234667	384	272	391	379	279	292	13.013286	9.440946	13.896439	10.418295	8.350816	9.188593	predicted gene 16295 [Source:MGI Symbol;Acc:MGI:3826546]
ENSMUSG00000112336	Gm47766	0.375184182	0.254060509	1	up	no	6.642546	5.09855	275	239	146	159	250	180	8.152593	7.260229	4.514816	3.807601	6.553929	4.93412	predicted gene, 47766 [Source:MGI Symbol;Acc:MGI:6096919]
ENSMUSG00000034987	Hrh2	0.37513274	0.133515141	1	up	no	1.218731779	0.916787655	400	240	336	292	295	273	1.46900026	0.898217035	1.288978041	0.867114995	0.953261013	0.929986957	Histamine H2 receptor [Source:UniProtKB/Swiss-Prot;Acc:P97292]
ENSMUSG00000027472	Pdrg1	0.374704068	0.081517501	0.968287698	up	no	7.320824448	5.623411791	827	704	877	874	757	562	7.362644077	6.430553142	8.169276124	6.293215361	5.944667674	4.632352337	p53 and DNA damage regulated 1 [Source:MGI Symbol;Acc:MGI:1915809]
ENSMUSG00000069755	Zfp125	0.374660455	0.219956318	1	up	no	1.190479961	0.895330311	155	130	216	127	173	139	1.071761523	0.930506331	1.569172027	0.71795755	1.067738012	0.90029537	_
ENSMUSG00000097466	D430036J16Rik	0.373874936	0.255996783	1	up	no	1.53378327	1.160801957	160	134	170	170	161	89	1.541501854	1.342411281	1.717436676	1.33027094	1.368849471	0.783285458	RIKEN cDNA D430036J16 gene [Source:MGI Symbol;Acc:MGI:2441977]
ENSMUSG00000060671	Atp8b2	0.373802481	0.03905334	0.768662174	up	no	5.640604506	4.33028707	2443	2109	1956	1604	2313	1904	6.214089439	5.502088991	5.205635088	3.303669463	5.19908823	4.488103517	Phospholipid-transporting ATPase ID [Source:UniProtKB/Swiss-Prot;Acc:P98199]
ENSMUSG00000060519	Tor3a	0.373493086	0.148914195	1	up	no	2.698301734	2.060040626	568	455	392	460	527	289	3.182366992	2.614349002	2.298189207	2.081562795	2.603616725	1.494942358	Torsin-3A [Source:UniProtKB/Swiss-Prot;Acc:Q9ER38]
ENSMUSG00000028971	Cort	0.373492666	0.175087845	1	up	no	10.74841133	8.274013333	395	276	309	318	355	216	12.711375	9.122609	10.41125	8.296984	10.090345	6.434711	Cortistatin Cortistatin-14 [Source:UniProtKB/Swiss-Prot;Acc:P56469]
ENSMUSG00000104443	4932442E05Rik	0.373417027	0.220885663	1	up	no	1.394274333	1.053508	216	146	149	147	133	170	1.733616	1.198171	1.251036	0.954878	0.939776	1.26587	RIKEN cDNA 4932442E05 gene [Source:MGI Symbol;Acc:MGI:1921665]
ENSMUSG00000034413	Neurl1b	0.373242652	0.01711562	0.545152664	up	no	7.954423792	6.118379783	2482	1998	2284	2088	2065	1952	8.553180516	7.067233147	8.242857711	5.826529688	6.289487514	6.239122146	E3 ubiquitin-protein ligase NEURL1B [Source:UniProtKB/Swiss-Prot;Acc:Q0MW30]
ENSMUSG00000048200	Cracr2b	0.373120197	0.224886202	1	up	no	1.151517003	0.866309798	148	181	109	101	150	129	1.145476912	1.435486194	0.873587903	0.628243103	1.037115603	0.933570687	EF-hand calcium-binding domain-containing protein 4A [Source:UniProtKB/Swiss-Prot;Acc:Q80ZJ8]
ENSMUSG00000093954	Gm16867	0.372858561	0.434012134	1	up	no	2.199084457	1.675469901	159	1017	1107	609	599	838	0.439335452	2.918258223	3.239659696	1.376582571	1.476017335	2.173809797	Mitoferrin-1 [Source:UniProtKB/Swiss-Prot;Acc:Q920G8]
ENSMUSG00000047867	Gimap6	0.372786509	0.204830677	1	up	no	1.352201245	1.021519641	215	238	185	259	169	145	1.340933726	1.513023621	1.202646388	1.303129374	0.928366455	0.833063094	GTPase IMAP family member 6 [Source:UniProtKB/Swiss-Prot;Acc:Q8K349]
ENSMUSG00000039850	Endov	0.372624717	0.273024068	1	up	no	3.312843026	2.535998121	1007	1385	361	831	931	700	3.569694215	5.037027723	1.33180714	2.387017862	2.918677123	2.302299379	Endonuclease V [Source:UniProtKB/Swiss-Prot;Acc:Q8C9A2]
ENSMUSG00000020176	Grb10	0.372619308	0.077935659	0.959452284	up	no	3.829484295	2.935050828	1826	1441	1424	1377	1870	977	4.373455458	3.541359847	3.57363758	2.669990831	3.965781018	2.169380635	Growth factor receptor-bound protein 10 [Source:UniProtKB/Swiss-Prot;Acc:Q60760]
ENSMUSG00000105891	A230001M10Rik	0.372556983	0.359617881	1	up	no	0.682787725	0.504634856	37	84	92	86	58	45	0.33751349	0.80484515	0.906004534	0.650488395	0.47802036	0.385395813	RIKEN cDNA A230001M10 gene [Source:MGI Symbol;Acc:MGI:2443043]
ENSMUSG00000059602	Syn3	0.372472335	0.046366549	0.829457356	up	no	4.894911857	3.758357662	2793	2862	2424	2509	3094	1706	4.960117061	5.214929527	4.509688982	3.60824696	4.857752756	2.80907327	Synapsin-3 [Source:UniProtKB/Swiss-Prot;Acc:Q8JZP2]
ENSMUSG00000089698	Gm2541	0.372388957	0.316532243	1	up	no	2.622305333	2.002987	75	87	89	90	79	59	2.293324	2.726897	2.846695	2.221072	2.127875	1.660014	predicted pseudogene 2541 [Source:MGI Symbol;Acc:MGI:3780709]
ENSMUSG00000084862	Gm16278	0.372109058	0.278761699	1	up	no	0.832292333	0.620337667	91	77	65	63	77	64	0.956686	0.829637	0.710554	0.533883	0.709757	0.617373	predicted gene 16278 [Source:MGI Symbol;Acc:MGI:3826602]
ENSMUSG00000031538	Plat	0.371961793	0.018342636	0.561898381	up	no	7.260012668	5.58731005	2155	1976	1955	1867	1849	1778	7.532881297	7.088117877	7.159038829	5.284926008	5.712060332	5.76494381	Tissue-type plasminogen activator Tissue-type plasminogen activator chain A Tissue-type plasminogen activator chain B [Source:UniProtKB/Swiss-Prot;Acc:P11214]
ENSMUSG00000027996	Sfrp2	0.371681132	0.333096163	1	up	no	0.788525187	0.586724551	58	116	56	80	61	61	0.581103513	1.197105556	0.587366493	0.654563282	0.54504207	0.5605683	secreted frizzled-related protein 2 [Source:MGI Symbol;Acc:MGI:108078]
ENSMUSG00000115546	AC167019.3	0.371618479	0.071039586	0.94227397	up	no	14.02620033	10.818351	748	843	792	720	841	601	12.891291	14.90257	14.28474	10.053357	12.80367	9.598026	_
ENSMUSG00000022678	Nde1	0.371378892	0.063496699	0.915757263	up	no	8.067657316	6.213952667	932	1264	1275	1156	1047	954	6.324087722	8.80945507	9.069429156	6.358262571	6.282187165	6.001408266	Nuclear distribution 1 [Source:UniProtKB/Swiss-Prot;Acc:Q9CZA6]
ENSMUSG00000024939	Fam89b	0.371357636	0.157568923	1	up	no	7.475891493	5.756578355	449	444	327	328	472	300	8.075889245	8.203512541	6.148272692	4.765499824	7.50412527	5.00010997	Leucine repeat adapter protein 25 [Source:UniProtKB/Swiss-Prot;Acc:Q9QUI1]
ENSMUSG00000020715	Ern1	0.37094736	0.077507595	0.959452284	up	no	1.460172992	1.106442072	543	551	516	439	557	433	1.442938119	1.499754668	1.437826191	0.942712256	1.305753308	1.07086065	Serine/threonine-protein kinase/endoribonuclease IRE1 Serine/threonine-protein kinase Endoribonuclease [Source:UniProtKB/Swiss-Prot;Acc:Q9EQY0]
ENSMUSG00000100954	Gm10138	0.370900304	0.11680171	1	up	no	3.183561284	2.439177198	445	393	381	327	380	384	3.40579711	3.0850145	3.059872242	2.016320632	2.569752608	2.731458352	predicted gene 10138 [Source:MGI Symbol;Acc:MGI:3708522]
ENSMUSG00000105477	Gm47307	0.370477899	0.417602433	1	up	no	16.330345	12.60930267	128	96	96	42	149	94	19.201609	14.766119	15.023307	5.065143	19.729294	13.033471	predicted gene, 47307 [Source:MGI Symbol;Acc:MGI:6096179]
ENSMUSG00000094958	3110021N24Rik	0.370268812	0.23612777	1	up	no	3.876048667	2.976023667	394	285	268	177	309	351	4.739269	3.515512	3.373365	1.725489	3.290531	3.912051	RIKEN cDNA 3110021N24 gene [Source:MGI Symbol;Acc:MGI:1920383]
ENSMUSG00000001128	Cfp	0.370083297	0.255706979	1	up	no	1.541887278	1.170390286	112	128	120	133	98	92	1.40504882	1.64534009	1.575272924	1.354030311	1.084347684	1.072792864	complement factor properdin [Source:MGI Symbol;Acc:MGI:97545]
ENSMUSG00000081058	Hist2h3c2	0.36994386	0.154579642	1	up	no	6.005459667	4.624481667	283	281	260	281	225	241	6.038524	6.163889	5.813966	4.86448	4.243677	4.765288	Histone H3.2 [Source:UniProtKB/Swiss-Prot;Acc:P84228]
ENSMUSG00000016487	Ppfibp1	0.369800248	0.050526746	0.857663453	up	no	2.231692377	1.704472576	1089	1112	1151	967	1229	817	2.122878128	2.22289397	2.349305034	1.523176561	2.119097332	1.471143833	PTPRF interacting protein, binding protein 1 (liprin beta 1) [Source:MGI Symbol;Acc:MGI:1914783]
ENSMUSG00000040363	Bcor	0.369690782	0.053603391	0.872891428	up	no	3.028904326	2.321610379	1115	1272	1142	976	998	1184	2.803500392	3.277214688	3.005997898	1.98720174	2.21905766	2.758571736	BCL-6 corepressor [Source:UniProtKB/Swiss-Prot;Acc:Q8CGN4]
ENSMUSG00000103864	Gm37415	0.369587612	0.394160589	1	up	no	0.460551085	0.33386862	80	30	28	21	42	50	0.79508524	0.302994639	0.283573377	0.168357432	0.370899897	0.462348531	predicted gene, 37415 [Source:MGI Symbol;Acc:MGI:5610643]
ENSMUSG00000038384	Setd1b	0.369546645	0.017141122	0.545152664	up	no	4.492287424	3.454548442	2418	2616	2251	2070	2426	2067	4.369141629	4.848454193	4.259266448	3.026979756	3.873651212	3.463014356	Histone-lysine N-methyltransferase SETD1B [Source:UniProtKB/Swiss-Prot;Acc:Q8CFT2]
ENSMUSG00000002043	Trappc6a	0.369396558	0.206296716	1	up	no	2.950842365	2.261676044	216	248	171	208	204	163	2.947609714	3.462854336	2.442063046	2.286275755	2.448848875	2.049903502	trafficking protein particle complex 6A [Source:MGI Symbol;Acc:MGI:1914341]
ENSMUSG00000022469	Rapgef3	0.369215015	0.051958859	0.862306767	up	no	3.604918359	2.768361259	971	1045	1066	879	1105	794	3.318202834	3.665508783	3.831043461	2.438708164	3.34824648	2.518129132	Mus musculus Rap guanine nucleotide exchange factor (GEF) 3 (Rapgef3), transcript variant 4, mRNA. [Source:RefSeq mRNA;Acc:NM_001357630]
ENSMUSG00000040715	Rsc1a1	0.368801832	0.058120551	0.890474606	up	no	11.609715	8.968300667	926	984	818	823	794	850	11.553118	12.596061	10.679966	8.31453	8.759158	9.831214	Regulatory solute carrier protein family 1 member 1 [Source:UniProtKB/Swiss-Prot;Acc:Q9ER99]
ENSMUSG00000030321	Efcab12	0.368644597	0.286714207	1	up	no	1.052340981	0.792499386	157	127	95	97	156	83	1.277346742	1.067869068	0.811807134	0.640237945	1.119182715	0.618077497	_
ENSMUSG00000009741	Ubp1	0.368547937	0.032149258	0.708980332	up	no	6.53742646	5.041096294	1483	1438	1265	1293	1310	1185	6.79105675	6.75302306	6.068199571	4.793441164	5.302326862	5.027520858	upstream binding protein 1 [Source:MGI Symbol;Acc:MGI:104889]
ENSMUSG00000023206	Il15ra	0.368054755	0.221845576	1	up	no	0.55158466	0.404865077	142	106	96	95	113	89	0.663422246	0.51017534	0.481156394	0.366477379	0.455570473	0.392547378	Interleukin-15 receptor subunit alpha Soluble interleukin-15 receptor subunit alpha [Source:UniProtKB/Swiss-Prot;Acc:Q60819]
ENSMUSG00000064342	mt-Ti	0.367824605	0.270850945	1	up	no	50.070999	38.78002267	190	136	140	163	161	102	60.000999	44.031948	46.18005	41.631371	44.861645	29.847052	mitochondrially encoded tRNA isoleucine [Source:MGI Symbol;Acc:MGI:102484]
ENSMUSG00000035007	Rundc1	0.367766088	0.015365619	0.520546732	up	no	16.125046	12.47411167	2271	2374	2328	2226	2060	2052	15.374286	16.494562	16.50629	12.206394	12.329821	12.88612	RUN domain-containing protein 1 [Source:UniProtKB/Swiss-Prot;Acc:Q0VDN7]
ENSMUSG00000055531	Cpsf6	0.367453936	0.019254347	0.574392014	up	no	5.996846887	4.625966424	2755	2928	2782	2685	2939	2070	5.717430619	6.230000332	6.04310971	4.511111062	5.389923367	3.976864844	Cleavage and polyadenylation specificity factor subunit 6 [Source:UniProtKB/Swiss-Prot;Acc:Q6NVF9]
ENSMUSG00000094090	Gm8494	0.367410942	0.361407277	1	up	no	1.66411	1.267489333	70	87	118	81	61	104	1.236678	1.580033	2.175619	1.15195	0.946368	1.70415	predicted gene 8494 [Source:MGI Symbol;Acc:MGI:3645114]
ENSMUSG00000099708	Gm29361	0.367146848	0.298374997	1	up	no	0.67663	0.502132333	66	56	60	57	56	47	0.719704	0.625156	0.68503	0.498126	0.539654	0.468617	predicted gene 29361 [Source:MGI Symbol;Acc:MGI:5580067]
ENSMUSG00000091993	B930036N10Rik	0.366607606	0.630598958	1	up	no	0.549702558	0.403911988	66	95	101	143	92	0	0.405003827	0.595465492	0.648638353	0.713283511	0.498452453	0	RIKEN cDNA B930036N10 gene [Source:MGI Symbol;Acc:MGI:3702496]
ENSMUSG00000028360	Slc44a5	0.366360689	0.031922302	0.706844785	up	no	6.571179096	5.075079709	2489	1939	1887	2001	1782	1928	7.604043558	6.074843908	6.03464982	4.949512028	4.813163505	5.462563593	solute carrier family 44, member 5 [Source:MGI Symbol;Acc:MGI:3035141]
ENSMUSG00000005611	Mrvi1	0.365762353	0.227637284	1	up	no	0.55539269	0.408623186	240	138	138	140	207	96	0.762069252	0.448812229	0.45529659	0.361111494	0.582065895	0.282692169	Protein MRVI1 [Source:UniProtKB/Swiss-Prot;Acc:Q9WUX5]
ENSMUSG00000097796	Gm16702	0.365658857	0.397783009	1	up	no	1.009626	0.761196667	165	48	113	93	140	55	1.507859	0.442469	1.07855	0.689727	1.126807	0.467056	predicted gene, 16702 [Source:MGI Symbol;Acc:MGI:4439626]
ENSMUSG00000068196	Col8a1	0.365614931	0.565990463	1	up	no	3.809256333	2.934122333	1011	906	702	788	1559	48	4.319392	3.968432	3.139945	2.724987	5.887661	0.189719	Collagen alpha-1(VIII) chain Vastatin [Source:UniProtKB/Swiss-Prot;Acc:Q00780]
ENSMUSG00000097462	9530026P05Rik	0.36558374	0.239160622	1	up	no	0.260347832	0.179685687	88	77	41	64	59	47	0.32864713	0.294440841	0.157955525	0.190154148	0.189836867	0.159066047	RIKEN cDNA 9530026P05 gene [Source:MGI Symbol;Acc:MGI:1924659]
ENSMUSG00000075595	Zfp652	0.365563081	0.008393533	0.370703008	up	no	4.700540004	3.626015357	3150	3400	3193	3203	3051	2599	4.450415097	4.928182595	4.72302232	3.663984019	3.80910873	3.404953322	zinc finger protein 652 [Source:MGI Symbol;Acc:MGI:2442221]
ENSMUSG00000085516	4930538E20Rik	0.365485703	0.553325721	1	up	no	1.988449284	1.521070019	98	48	103	158	22	51	2.291996725	1.148949266	2.52440186	3.011615195	0.452176712	1.09941815	RIKEN cDNA 4930538E20 gene [Source:MGI Symbol;Acc:MGI:1925450]
ENSMUSG00000021838	Samd4	0.36539931	0.057391135	0.890474606	up	no	2.834476889	2.177899403	954	1284	1056	957	1105	910	2.402126723	3.316730745	2.784573201	1.951626171	2.458290656	2.123781381	1 [Source:UniProtKB/Swiss-Prot;Acc:Q8CBY1]
ENSMUSG00000072898	Gm10434	0.365359423	0.259656684	1	up	no	7.882132667	6.096333667	205	126	173	147	162	148	9.419396	5.935258	8.291744	5.462298	6.556695	6.270008	predicted gene 10434 [Source:MGI Symbol;Acc:MGI:3708552]
ENSMUSG00000017774	Myo1c	0.365219541	0.048062493	0.842714983	up	no	3.316356608	2.55229093	1065	949	935	929	813	918	3.51212093	3.209550303	3.22739859	2.485631408	2.364571244	2.806670138	Unconventional myosin-Ic [Source:UniProtKB/Swiss-Prot;Acc:Q9WTI7]
ENSMUSG00000078958	Atp6ap1l	0.365176691	0.441410908	1	up	no	0.664785211	0.493759189	51	24	40	16	47	36	0.864500688	0.415964483	0.713890463	0.219351627	0.693152769	0.56877317	ATPase, H+ transporting, lysosomal accessory protein 1-like [Source:MGI Symbol;Acc:MGI:3648665]
ENSMUSG00000030861	Acadsb	0.365091923	0.034223703	0.725068441	up	no	6.687923484	5.170275499	2306	2110	2042	2084	1640	2124	7.002195823	6.573051303	6.488523327	5.127289024	4.401796696	5.981740775	acyl-Coenzyme A dehydrogenase, short/branched chain [Source:MGI Symbol;Acc:MGI:1914135]
ENSMUSG00000037469	Acp7	0.365019406	0.500898029	1	up	no	0.551503909	0.405865703	51	17	97	75	52	22	0.498605768	0.166976167	0.988929794	0.587448029	0.442370129	0.187778952	acid phosphatase 7, tartrate resistant (putative) [Source:HGNC Symbol;Acc:HGNC:33781]
ENSMUSG00000074899	Sptbn5	0.364537977	0.126427991	1	up	no	0.111269965	0.064097096	70	25	80	39	34	46	0.129441259	0.047968514	0.156400123	0.057857904	0.055183303	0.079250081	_
ENSMUSG00000029175	Slc35f6	0.364494309	0.174814645	1	up	no	3.270706405	2.518166164	1433	891	1412	1686	817	924	3.677750485	2.341688135	3.792680595	3.505846994	1.849452282	2.199199217	Solute carrier family 35 member F6 [Source:UniProtKB/Swiss-Prot;Acc:Q8VE96]
ENSMUSG00000029601	Iqcd	0.364339865	0.426453592	1	up	no	0.858610346	0.644671759	56	43	96	72	81	22	0.718353358	0.557016939	1.300460742	0.747625252	0.926837021	0.259553004	IQ motif containing D [Source:MGI Symbol;Acc:MGI:1922982]
ENSMUSG00000048332	Lhfp	0.36429592	0.053675826	0.872891428	up	no	4.091113641	3.155857867	1017	921	871	782	877	871	4.339618534	4.037007188	3.8967152	2.705418027	3.310902173	3.451253401	LHFPL tetraspan subfamily member 6 protein [Source:UniProtKB/Swiss-Prot;Acc:Q8BM86]
ENSMUSG00000066892	Fbxl12	0.364152022	0.14519044	1	up	no	1.140211649	0.863551928	256	308	223	235	249	216	1.083627642	1.346143642	0.990863663	0.807811083	0.932807853	0.850036848	F-box/LRR-repeat protein 12 [Source:UniProtKB/Swiss-Prot;Acc:Q9EPX5]
ENSMUSG00000000184	Ccnd2	0.364099669	0.011823135	0.450190733	up	no	10.92853434	8.46865936	5055	4705	4067	4432	4589	3572	11.71897319	11.19385825	9.872771595	8.323649647	9.404431304	7.67789713	G1/S-specific cyclin-D2 [Source:UniProtKB/Swiss-Prot;Acc:P30280]
ENSMUSG00000079067	Hmgn2-ps1	0.363647266	0.468449306	1	up	no	3.552471667	2.738691	34	43	57	61	28	35	2.611921	3.442414	4.60308	3.819831	1.873198	2.523044	high mobility group nucleosomal binding domain 2, pseudogene 1 [Source:MGI Symbol;Acc:MGI:3783162]
ENSMUSG00000024593	Megf10	0.363594232	0.059814104	0.901280294	up	no	2.698166608	2.074807388	882	1043	871	758	942	815	2.492601559	3.024517405	2.577380859	1.734607581	2.352954872	2.136859709	Multiple epidermal growth factor-like domains protein 10 [Source:UniProtKB/Swiss-Prot;Acc:Q6DIB5]
ENSMUSG00000004894	Hapln2	0.363490076	0.190252533	1	up	no	4.280453013	3.30484707	336	578	449	426	518	299	3.080361701	5.451764215	4.309233124	3.16251853	4.207829093	2.544193585	hyaluronan and proteoglycan link protein 2 [Source:MGI Symbol;Acc:MGI:2137300]
ENSMUSG00000091277	Gm1818	0.363342542	0.303428018	1	up	no	1.782835	1.363643333	109	89	88	85	111	60	1.991567	1.669923	1.687015	1.267571	1.806352	1.017007	predicted gene 1818 [Source:MGI Symbol;Acc:MGI:3037676]
ENSMUSG00000040717	Il17rd	0.363307297	0.35780262	1	up	no	0.720485808	0.537829614	546	136	387	397	174	368	1.083982023	0.274187018	0.803288383	0.636512472	0.302611438	0.674364934	Interleukin-17 receptor D [Source:UniProtKB/Swiss-Prot;Acc:Q8JZL1]
ENSMUSG00000039899	Fgl2	0.363096823	0.263251308	1	up	no	0.969799667	0.731762667	235	129	132	138	186	115	1.352404	0.761049	0.795946	0.640652	0.943422	0.611214	Fibroleukin [Source:UniProtKB/Swiss-Prot;Acc:P12804]
ENSMUSG00000027951	Adar	0.36302701	0.011642704	0.447991777	up	no	18.91670024	14.68608306	7899	6221	6527	6426	6259	6098	21.2281273	17.15505458	18.36691883	13.98932521	14.86995928	15.19896469	Mus musculus adenosine deaminase, RNA-specific (Adar), transcript variant 4, mRNA. [Source:RefSeq mRNA;Acc:NM_001357958]
ENSMUSG00000015970	Chdh	0.362412834	0.20448138	1	up	no	1.883602472	1.442970088	536	571	467	515	664	248	1.880636981	2.056555636	1.713614799	1.463527124	2.060511271	0.804871871	Choline dehydrogenase, mitochondrial [Source:UniProtKB/Swiss-Prot;Acc:Q8BJ64]
ENSMUSG00000040118	Cacna2d1	0.362218424	0.128881634	1	up	no	8.225296738	6.37680932	3675	3182	6792	4623	4086	3814	6.45090858	5.731895021	12.49308661	6.57542616	6.343229195	6.211772606	Voltage-dependent calcium channel subunit alpha-2/delta-1 Voltage-dependent calcium channel subunit alpha-2-1 Voltage-dependent calcium channel subunit delta-1 [Source:UniProtKB/Swiss-Prot;Acc:O08532]
ENSMUSG00000032553	Srprb	0.361388917	0.28035365	1	up	no	8.111264673	6.291770115	783	1837	2020	1208	2132	913	3.980584884	9.587983059	10.76522608	4.980345987	9.591457844	4.303506514	Signal recognition particle receptor subunit beta [Source:UniProtKB/Swiss-Prot;Acc:P47758]
ENSMUSG00000053907	Mat2a	0.361200185	0.021790466	0.602918894	up	no	29.04182689	22.5873977	5291	5848	6324	6000	4612	5388	25.7293568	29.18054757	32.21557631	23.63538273	19.82419473	24.30261564	methionine adenosyltransferase II, alpha [Source:MGI Symbol;Acc:MGI:2443731]
ENSMUSG00000041229	Phf8	0.361139506	0.038667907	0.762918738	up	no	3.173739255	2.448767744	1428	1360	1198	1217	1135	1247	3.334267833	3.260446262	2.92650367	2.301738488	2.339871382	2.704693361	Histone lysine demethylase PHF8 [Source:UniProtKB/Swiss-Prot;Acc:Q80TJ7]
ENSMUSG00000031257	Nox1	0.360922282	0.300957485	1	up	no	0.6604162	0.492110725	82	108	104	125	82	54	0.537007789	0.726393106	0.717847706	0.66739218	0.478448626	0.330491371	NADPH oxidase 1 [Source:UniProtKB/Swiss-Prot;Acc:Q8CIZ9]
ENSMUSG00000042182	Bend6	0.360403314	0.139423368	1	up	no	23.53516011	18.3105321	4133	3260	3431	1923	3753	4029	26.36134148	21.33168289	22.91245596	9.935475709	21.16134582	23.83477477	BEN domain-containing protein 6 [Source:UniProtKB/Swiss-Prot;Acc:Q6PFX2]
ENSMUSG00000023905	Tnfrsf12a	0.36003687	0.230051196	1	up	no	3.955490333	3.059813667	158	194	161	161	169	136	3.561502	4.490425	3.814544	2.955972	3.368211	2.855258	Tumor necrosis factor receptor superfamily member 12A [Source:UniProtKB/Swiss-Prot;Acc:Q9CR75]
ENSMUSG00000021068	Nin	0.359974783	0.019982201	0.57637156	up	no	2.59291707	1.998262272	1996	1908	2029	1869	1824	1683	2.552363374	2.505411909	2.720975927	1.938112487	2.061453448	1.995220881	Ninein [Source:UniProtKB/Swiss-Prot;Acc:Q61043]
ENSMUSG00000003752	Itpkc	0.359604858	0.119569147	1	up	no	1.923445667	1.477029068	399	520	449	385	407	437	1.64284372	2.195078386	1.932414897	1.281628542	1.481394727	1.668063936	Inositol-trisphosphate 3-kinase C [Source:UniProtKB/Swiss-Prot;Acc:Q7TS72]
ENSMUSG00000041771	Slc24a4	0.359373176	0.082588611	0.970401291	up	no	5.68559591	4.409890442	1124	1251	1080	822	1210	1089	5.420735784	6.184206674	5.451845273	3.20517618	5.156104249	4.868390897	solute carrier family 24 (sodium/potassium/calcium exchanger), member 4 [Source:MGI Symbol;Acc:MGI:2447362]
ENSMUSG00000046341	Gm11223	0.359298171	0.318797483	1	up	no	7.558098667	5.869822667	103	215	138	152	144	123	4.976522	10.695924	7.00185	5.961426	6.143956	5.504086	predicted gene 11223 [Source:MGI Symbol;Acc:MGI:3651631]
ENSMUSG00000022791	Tnk2	0.359094256	0.037251455	0.749314686	up	no	31.82205813	24.78815724	8404	7689	7404	7887	5576	7999	33.36421621	31.31892575	30.78303244	25.36135748	19.55396085	29.44915339	tyrosine kinase, non-receptor, 2 [Source:MGI Symbol;Acc:MGI:1858308]
ENSMUSG00000097575	Gm26796	0.358453441	0.278181991	1	up	no	1.600031	1.226024667	140	167	183	104	144	187	1.335721	1.635563	1.828809	0.801898	1.216933	1.659243	predicted gene, 26796 [Source:MGI Symbol;Acc:MGI:5477290]
ENSMUSG00000051978	Erich1	0.358156882	0.162236953	1	up	no	4.070717745	3.153829823	345	278	249	286	264	243	4.731988375	3.909446819	3.570718042	3.172749821	3.196477913	3.092261734	_
ENSMUSG00000097861	Gm26858	0.357999308	0.408900592	1	up	no	1.109984	0.844085	132	67	106	149	82	48	1.408665	0.734523	1.186764	1.2906	0.773253	0.468402	predicted gene, 26858 [Source:MGI Symbol;Acc:MGI:5477352]
ENSMUSG00000045752	Tssc4	0.357846332	0.154435056	1	up	no	8.765677867	6.818141927	581	983	614	781	612	612	6.829017813	11.9001508	7.567864988	7.437744751	6.349354358	6.667326672	tumor-suppressing subchromosomal transferable fragment 4 [Source:MGI Symbol;Acc:MGI:1861712]
ENSMUSG00000078919	Dpm1	0.357833558	0.146192085	1	up	no	2.251400359	1.734881178	671	631	963	582	896	577	1.951093686	1.869719627	2.933387765	1.366272	2.294511528	1.543860007	Dolichol-phosphate mannosyltransferase subunit 1 [Source:UniProtKB/Swiss-Prot;Acc:O70152]
ENSMUSG00000096056	Gm21986	0.357592348	0.280928241	1	up	no	0.180126667	0.118629333	40	65	31	60	22	26	0.155442	0.260303	0.124635	0.189704	0.074804	0.09138	predicted gene 21986 [Source:MGI Symbol;Acc:MGI:5439455]
ENSMUSG00000104415	Gm37069	0.357566247	0.253590648	1	up	no	0.899264	0.679905667	143	215	143	107	170	163	0.752505	1.157557	0.78773	0.452845	0.790737	0.796135	predicted gene, 37069 [Source:MGI Symbol;Acc:MGI:5610297]
ENSMUSG00000107066	Gm4482	0.357304839	0.41749858	1	up	no	1.549163667	1.187372667	44	60	51	63	38	41	1.292746	1.799955	1.55479	1.496748	0.967418	1.097952	predicted gene 4482 [Source:MGI Symbol;Acc:MGI:3782666]
ENSMUSG00000066197	Gpr139	0.357241254	0.258166833	1	up	no	0.359617333	0.258803	96	76	63	85	48	67	0.43165	0.351028	0.296174	0.308272	0.19056	0.277577	G protein-coupled receptor 139 [Source:MGI Symbol;Acc:MGI:2685341]
ENSMUSG00000033434	Gtpbp6	0.357094684	0.077514176	0.959452284	up	no	7.200744692	5.599948744	821	852	1065	861	835	814	6.312237979	6.709984735	8.580011362	5.348936975	5.662413784	5.788495472	GTP binding protein 6 (putative) [Source:HGNC Symbol;Acc:HGNC:30189]
ENSMUSG00000036986	Pml	0.356743677	0.149698573	1	up	no	1.511231254	1.158251133	475	344	323	350	303	371	1.846376601	1.37411865	1.313198512	1.097920804	1.041776691	1.335055903	Protein PML [Source:UniProtKB/Swiss-Prot;Acc:Q60953]
ENSMUSG00000029718	Pcolce	0.356678143	0.409254279	1	up	no	2.942793683	2.276302288	644	505	378	464	807	125	3.645300246	2.939357703	2.243723099	2.131160707	4.047790528	0.649955629	Procollagen C-endopeptidase enhancer 1 [Source:UniProtKB/Swiss-Prot;Acc:Q61398]
ENSMUSG00000113750	Gm5628	0.356598765	0.419027635	1	up	no	1.117842333	0.851139333	51	34	73	32	63	46	1.055623	0.708256	1.589648	0.525422	1.151526	0.87647	predicted gene 5628 [Source:MGI Symbol;Acc:MGI:3779506]
ENSMUSG00000020844	Nxn	0.356314014	0.160133649	1	up	no	4.937599044	3.835159971	707	723	718	669	899	402	4.753792648	4.997070715	5.061933768	3.6430675	5.352774125	2.509638288	Nucleoredoxin [Source:UniProtKB/Swiss-Prot;Acc:P97346]
ENSMUSG00000000561	Wdr77	0.355962879	0.124627352	1	up	no	5.956209699	4.632007241	965	1787	1120	1245	1145	1153	4.340388941	8.254341848	5.273898307	4.538501768	4.552463065	4.80505689	WD repeat domain 77 [Source:MGI Symbol;Acc:MGI:1917715]
ENSMUSG00000030424	Zfp939	0.355858164	0.194108792	1	up	no	2.076599828	1.600805333	239	236	218	252	214	165	2.100658484	2.123139	2.006002	1.792645	1.664258	1.345513	_
ENSMUSG00000040123	Zmym5	0.35571363	0.259011522	1	up	no	3.40661189	2.640357533	1092	1064	1095	1201	1406	394	3.34958879	3.351532225	3.518714654	2.98420109	3.81787971	1.118991799	zinc finger, MYM-type 5 [Source:MGI Symbol;Acc:MGI:3041170]
ENSMUSG00000027875	Hmgcs2	0.355542106	0.15053172	1	up	no	2.45904	1.900084	314	430	342	328	382	277	2.081755	2.922956	2.372409	1.762558	2.234936	1.702758	Hydroxymethylglutaryl-CoA synthase, mitochondrial [Source:UniProtKB/Swiss-Prot;Acc:P54869]
ENSMUSG00000021453	Gadd45g	0.355532483	0.071292093	0.943057827	up	no	15.77610153	12.30846117	729	887	867	776	760	739	13.53083858	16.91041451	16.8870515	11.69285957	12.49343107	12.73909286	growth arrest and DNA damage inducible gamma [Source:HGNC Symbol;Acc:HGNC:4097]
ENSMUSG00000024338	Psmb8	0.355453827	0.295787045	1	up	no	1.419781659	1.087897409	163	232	128	192	118	164	1.298496013	1.895063999	1.065784966	1.233344584	0.819118205	1.211229437	Proteasome subunit beta type-8 [Source:UniProtKB/Swiss-Prot;Acc:P28063]
ENSMUSG00000056771	Gm10010	0.355254176	0.177583475	1	up	no	2.884795667	2.23331	303	318	290	216	302	302	2.811626	3.026404	2.816357	1.623652	2.476123	2.600155	_
ENSMUSG00000031441	Atp11a	0.35518595	0.089962036	1	up	no	3.966427211	3.079006221	2075	1871	2005	1569	2524	1324	4.054740383	3.744508323	4.100032928	2.481476137	4.361160889	2.394381638	Probable phospholipid-transporting ATPase IH [Source:UniProtKB/Swiss-Prot;Acc:P98197]
ENSMUSG00000042524	Sun2	0.355096275	0.103225516	1	up	no	5.031986457	3.912276662	1190	1208	1267	816	1391	1112	4.786838032	4.976633992	5.332487346	2.656287766	4.940883355	4.139658863	SUN domain-containing protein 2 [Source:UniProtKB/Swiss-Prot;Acc:Q8BJS4]
ENSMUSG00000025038	Efhc2	0.355053664	0.306137845	1	up	no	0.687546333	0.515735667	84	86	68	69	96	45	0.714344	0.746867	0.601428	0.473794	0.722089	0.351324	EF-hand domain-containing family member C2 [Source:UniProtKB/Swiss-Prot;Acc:Q9D485]
ENSMUSG00000030166	Rad52	0.354910827	0.136386125	1	up	no	1.21080077	0.92493868	334	344	274	301	325	230	1.243592295	1.31821266	1.070597354	0.909962416	1.067267569	0.797586054	RAD52 homolog, DNA repair protein [Source:MGI Symbol;Acc:MGI:101949]
ENSMUSG00000040721	Zfhx2	0.354891544	0.019883362	0.57637156	up	no	4.023193866	3.124042478	3419	3368	3034	2647	3004	3242	4.105056142	4.149955358	3.814570097	2.573094681	3.188956081	3.610076672	zinc finger homeobox 2 [Source:MGI Symbol;Acc:MGI:2686934]
ENSMUSG00000029861	Fam131b	0.354844839	0.048497245	0.844931307	up	no	10.50920762	8.195909552	2015	2084	1699	1585	2100	1602	10.70463278	11.36990023	9.453089858	6.823372034	9.868247124	7.896109498	Protein FAM131B [Source:UniProtKB/Swiss-Prot;Acc:Q3TY60]
ENSMUSG00000032204	Aqp9	0.354653425	0.276894054	1	up	no	0.199631923	0.13432939	49	44	20	20	34	34	0.252881628	0.23639654	0.109617601	0.085352607	0.156590115	0.161045448	Aquaporin-9 [Source:UniProtKB/Swiss-Prot;Acc:Q9JJJ3]
ENSMUSG00000033222	Ttf2	0.354553067	0.254714843	1	up	no	0.368460893	0.266388837	91	119	172	128	138	65	0.253925589	0.3407758	0.51068129	0.292149944	0.339600617	0.167415951	transcription termination factor, RNA polymerase II [Source:MGI Symbol;Acc:MGI:1921294]
ENSMUSG00000015846	Rxra	0.354023221	0.035087167	0.736875716	up	no	8.240872305	6.425891724	2329	1835	1889	1935	2005	1602	9.301259886	7.521449101	7.899907929	6.263514376	7.079744703	5.934416095	retinoid X receptor alpha [Source:MGI Symbol;Acc:MGI:98214]
ENSMUSG00000027333	Smox	0.35400712	0.04433144	0.811763459	up	no	7.14509277	5.568617967	1252	1328	1175	1267	1130	1044	6.971361688	7.598053645	6.865862978	5.725269672	5.584495644	5.396088584	spermine oxidase [Source:MGI Symbol;Acc:MGI:2445356]
ENSMUSG00000043241	Upf2	0.353998019	0.027306684	0.669227522	up	no	9.633282499	7.515445361	2640	2160	2286	2101	2461	1919	10.5218415	8.833316586	9.544689411	6.782416198	8.670096225	7.093823662	UPF2 regulator of nonsense transcripts homolog (yeast) [Source:MGI Symbol;Acc:MGI:2449307]
ENSMUSG00000027035	Cers6	0.353966202	0.013291959	0.481375686	up	no	7.860153268	6.128263608	3175	3016	3179	3141	2872	2587	7.799380758	7.60191397	8.179165077	6.252419226	6.234871092	5.897500505	Ceramide synthase 6 [Source:UniProtKB/Swiss-Prot;Acc:Q8C172]
ENSMUSG00000051335	Gfod1	0.353837083	0.016852922	0.53959148	up	no	22.74332132	17.77490214	7570	7432	7007	6503	6304	7299	22.92049601	23.09011571	22.21935223	15.94996397	16.8748068	20.49993566	Glucose-fructose oxidoreductase domain-containing protein 1 [Source:UniProtKB/Swiss-Prot;Acc:Q3UHD2]
ENSMUSG00000086316	Nbdy	0.353695157	0.152373825	1	up	no	5.462283302	4.252915667	519	384	551	486	375	466	5.703612798	4.333891568	6.349345539	4.332813541	3.651843176	4.774090283	_
ENSMUSG00000087620	5330434G04Rik	0.353672983	0.166121148	1	up	no	0.817226857	0.617811788	260	212	245	259	176	203	0.869712757	0.725567117	0.856400698	0.702547387	0.519811698	0.631076278	RIKEN cDNA 5330434G04 gene [Source:MGI Symbol;Acc:MGI:1925519]
ENSMUSG00000037492	Zmat4	0.353606491	0.022475346	0.615093254	up	no	5.852201252	4.55834282	2374	2195	1972	2023	2038	1909	6.228611572	5.909730794	5.418261389	4.298628926	4.727771258	4.648628275	zinc finger, matrin type 4 [Source:MGI Symbol;Acc:MGI:2443497]
ENSMUSG00000091754	Gm3636	0.35356908	0.34833604	1	up	no	1.250331845	0.956831163	118	113	66	118	90	61	1.470249093	1.430419062	0.85032738	1.180417966	0.994121	0.695954524	_
ENSMUSG00000031842	Pde4c	0.353461841	0.231747115	1	up	no	0.17150361	0.112506879	39	52	42	56	20	28	0.146044443	0.202402646	0.166063742	0.174438648	0.065558137	0.097523852	cAMP-specific 3',5'-cyclic phosphodiesterase 4C [Source:UniProtKB/Swiss-Prot;Acc:Q3UEI1]
ENSMUSG00000031980	Agt	0.352876071	0.089421107	1	up	no	14.52505033	11.35172967	1559	1066	1073	1221	1262	913	17.983356	12.622233	12.969562	11.416123	12.868175	9.770891	angiotensinogen [Source:HGNC Symbol;Acc:HGNC:333]
ENSMUSG00000114255	Gm10734	0.352832545	0.247876418	1	up	no	3.321976667	2.579562333	157	229	180	171	170	176	2.698596	4.035612	3.231722	2.36867	2.576293	2.793724	_
ENSMUSG00000046546	Fam43a	0.352704938	0.089005008	1	up	no	5.102541	3.974185	788	633	688	618	731	576	5.58739	4.605701	5.114532	3.549465	4.583012	3.790078	Protein FAM43A [Source:UniProtKB/Swiss-Prot;Acc:Q8BUP8]
ENSMUSG00000039738	Slx4	0.352645917	0.05857123	0.892104302	up	no	2.436146916	1.886174534	946	786	785	825	738	726	2.68758417	2.29132013	2.329536448	1.899164355	1.852347673	1.907011575	Structure-specific endonuclease subunit SLX4 [Source:UniProtKB/Swiss-Prot;Acc:Q6P1D7]
ENSMUSG00000020300	Cpeb4	0.352476154	0.027478943	0.669227522	up	no	9.694660428	7.571556515	2774	2514	2996	2706	2279	2613	9.502043044	8.834706293	10.74723195	7.508816936	6.903653091	8.302199518	Cytoplasmic polyadenylation element-binding protein 4 [Source:UniProtKB/Swiss-Prot;Acc:Q7TN98]
ENSMUSG00000037443	Cep85	0.35218307	0.11317637	1	up	no	2.827129919	2.193107057	771	680	560	653	522	654	3.18500744	2.878332887	2.418049431	2.178378236	1.899442984	2.50149995	Centrosomal protein of 85 kDa [Source:UniProtKB/Swiss-Prot;Acc:Q8BMK0]
ENSMUSG00000030138	Bms1	0.351936672	0.058353068	0.892104302	up	no	5.392467629	4.203521839	1026	1282	1202	1132	1120	970	4.611603129	5.911906897	5.653892861	4.118854718	4.446718996	4.044991804	BMS1, ribosome biogenesis factor [Source:MGI Symbol;Acc:MGI:2446132]
ENSMUSG00000064294	Aox3	0.351913638	0.279306129	1	up	no	0.334786401	0.240674315	115	89	117	61	151	59	0.349371391	0.280105503	0.374882309	0.150784457	0.40552439	0.165714098	Aldehyde oxidase 3 [Source:UniProtKB/Swiss-Prot;Acc:G3X982]
ENSMUSG00000079355	Ackr4	0.351717284	0.18962823	1	up	no	0.606123614	0.453354292	123	170	146	130	140	116	0.494187454	0.704211243	0.619972143	0.425821488	0.498946937	0.43529445	atypical chemokine receptor 4 [Source:MGI Symbol;Acc:MGI:2181676]
ENSMUSG00000039616	Mocos	0.35159586	0.444188806	1	up	no	0.472881333	0.348976667	71	62	52	12	91	53	0.531832	0.476912	0.4099	0.073077	0.604762	0.369091	Molybdenum cofactor sulfurase [Source:UniProtKB/Swiss-Prot;Acc:Q14CH1]
ENSMUSG00000032323	Cyp11a1	0.351234689	0.277766184	1	up	no	0.348700563	0.251742169	104	71	54	74	46	74	0.471067619	0.322677056	0.252357015	0.266517337	0.181183962	0.307525209	Cholesterol side-chain cleavage enzyme, mitochondrial [Source:UniProtKB/Swiss-Prot;Acc:Q9QZ82]
ENSMUSG00000026193	Fn1	0.35120525	0.054140518	0.873837599	up	no	5.540529558	4.321774233	3270	2763	2688	2115	3266	2538	6.092919815	5.283215296	5.245453564	3.190214828	5.38490403	4.390203841	Fibronectin Anastellin [Source:UniProtKB/Swiss-Prot;Acc:P11276]
ENSMUSG00000032846	Zswim6	0.35118907	0.057933941	0.890474606	up	no	4.489494346	3.497877686	1026	1246	1074	1032	1126	907	4.030166475	5.024289338	4.414027224	3.280500714	3.909708352	3.303423993	zinc finger SWIM-type containing 6 [Source:MGI Symbol;Acc:MGI:1914513]
ENSMUSG00000050714	Zbtb26	0.3507597	0.131039199	1	up	no	0.79701238	0.603411146	319	364	334	379	308	227	0.732567324	0.857338424	0.801131392	0.704718995	0.623766512	0.481747931	zinc finger and BTB domain containing 26 [Source:MGI Symbol;Acc:MGI:2444402]
ENSMUSG00000110528	Gm1943	0.35068687	0.370918111	1	up	no	14.90619433	11.66801733	146	83	121	81	108	128	18.277687	10.633528	15.807368	8.214437	11.945991	14.843624	predicted gene 1943 [Source:MGI Symbol;Acc:MGI:3037801]
ENSMUSG00000024053	Emilin2	0.350541871	0.192402825	1	up	no	1.302884667	1.000267667	206	245	233	197	244	177	1.145715	1.402815	1.360124	0.889374	1.199301	0.912128	Mus musculus elastin microfibril interfacer 2 (Emilin2), transcript variant 3, mRNA. [Source:RefSeq mRNA;Acc:NM_001357337]
ENSMUSG00000015484	Fam163a	0.350201048	0.091745905	1	up	no	3.808936	2.966461667	682	677	627	577	591	640	3.833924	3.901566	3.691318	2.627731	2.937034	3.33462	Protein FAM163A [Source:UniProtKB/Swiss-Prot;Acc:Q8CAA5]
ENSMUSG00000048583	Igf2	0.350192392	0.335193917	1	up	no	24.14135364	18.9168444	5969	6024	6538	6116	9373	1773	22.75423789	23.56825027	26.10157277	18.89017049	31.59255311	6.267809585	Insulin-like growth factor II Insulin-like growth factor II Preptin [Source:UniProtKB/Swiss-Prot;Acc:P09535]
ENSMUSG00000039168	Dap	0.349982486	0.17883227	1	up	no	4.449398338	3.469428922	502	321	332	335	356	360	5.679666065	3.733726252	3.934802696	3.067547613	3.558206905	3.782532249	Death-associated protein 1 [Source:UniProtKB/Swiss-Prot;Acc:Q91XC8]
ENSMUSG00000097157	Gm26512	0.349826133	0.333522728	1	up	no	0.58706075	0.439121907	91	85	118	129	84	52	0.533219493	0.507946927	0.720015828	0.606468562	0.432174216	0.278722943	predicted gene, 26512 [Source:MGI Symbol;Acc:MGI:5477006]
ENSMUSG00000052135	Foxo6	0.349651857	0.118478366	1	up	no	11.49033133	8.995784333	1679	1140	1225	1500	934	1287	14.009695	9.758225	10.703074	10.136876	6.891685	9.958792	Forkhead box protein O6 [Source:UniProtKB/Swiss-Prot;Acc:Q70KY4]
ENSMUSG00000037490	Slc2a12	0.349526602	0.438799063	1	up	no	6.279536935	4.906925906	1424	1074	1082	1031	2032	245	7.328025236	5.673414202	5.837171366	4.301691366	9.250130243	1.168956108	solute carrier family 2 (facilitated glucose transporter), member 12 [Source:MGI Symbol;Acc:MGI:3052471]
ENSMUSG00000038037	Socs1	0.349489381	0.430130498	1	up	no	0.40798657	0.298699273	81	51	31	72	53	19	0.600163736	0.386837427	0.236958546	0.432331026	0.339007865	0.124758928	Suppressor of cytokine signaling 1 [Source:UniProtKB/Swiss-Prot;Acc:O35716]
ENSMUSG00000037795	N4bp2	0.349320843	0.087031199	0.991851367	up	no	0.741722827	0.560713307	453	569	474	440	503	389	0.658842572	0.848535803	0.717790107	0.516359881	0.643271698	0.522508341	NEDD4 binding protein 2 [Source:HGNC Symbol;Acc:HGNC:29851]
ENSMUSG00000030431	Tmem238	0.349214486	0.33197345	1	up	no	2.467814072	1.915763325	221	175	86	137	159	139	3.335586228	2.711629181	1.356226807	1.679200618	2.11960311	1.948486247	Transmembrane protein 238 [Source:UniProtKB/Swiss-Prot;Acc:A9JSM3]
ENSMUSG00000086929	Gm11788	0.349113774	0.423122134	1	up	no	2.228887667	1.728331	79	36	55	53	56	46	3.058768	1.426687	2.201208	1.642729	1.918669	1.623595	predicted gene 11788 [Source:MGI Symbol;Acc:MGI:3649943]
ENSMUSG00000051985	Igfn1	0.349074049	0.333101546	1	up	no	0.143733404	0.091352127	67	56	52	63	67	4	0.162021829	0.139018742	0.130159641	0.123155346	0.141899045	0.00900199	Immunoglobulin-like and fibronectin type III domain-containing protein 1 [Source:UniProtKB/Swiss-Prot;Acc:Q3KNY0]
ENSMUSG00000086472	Gm16172	0.349006625	0.420016979	1	up	no	2.249615	1.744740333	82	40	86	65	46	77	2.593212	1.286918	2.868715	1.670234	1.293288	2.270699	predicted gene 16172 [Source:MGI Symbol;Acc:MGI:3801735]
ENSMUSG00000041703	Zic5	0.348918521	0.318606061	1	up	no	1.072030274	0.820245895	207	280	217	163	356	114	0.921647626	1.282424405	1.012018792	0.58781527	1.403880428	0.469041989	zinc finger protein of the cerebellum 5 [Source:MGI Symbol;Acc:MGI:1929518]
ENSMUSG00000056529	Ptafr	0.34869159	0.299585677	1	up	no	0.451767333	0.333300667	60	102	59	78	60	55	0.35944	0.627039	0.368823	0.37776	0.316353	0.305789	Platelet-activating factor receptor [Source:UniProtKB/Swiss-Prot;Acc:Q62035]
ENSMUSG00000032966	Fkbp1a	0.348522649	0.131350822	1	up	no	83.63761128	65.66651007	11024	21150	11101	13502	12043	14271	62.36298814	122.7800441	65.76980164	61.87582006	60.23703791	74.88667223	Peptidyl-prolyl cis-trans isomerase FKBP1A [Source:UniProtKB/Swiss-Prot;Acc:P26883]
ENSMUSG00000022901	Cd86	0.348318764	0.293667217	1	up	no	0.532927423	0.397163821	70	81	112	91	60	80	0.413761987	0.488342846	0.696677436	0.438066618	0.31448993	0.438934913	T-lymphocyte activation antigen CD86 [Source:UniProtKB/Swiss-Prot;Acc:P42082]
ENSMUSG00000019947	Arid5b	0.348239991	0.057055665	0.890098192	up	no	3.375183805	2.629902252	1534	1500	1526	1283	1735	1151	3.324270853	3.338702309	3.462578253	2.250325027	3.326080808	2.313300921	AT-rich interactive domain-containing protein 5B [Source:UniProtKB/Swiss-Prot;Acc:Q8BM75]
ENSMUSG00000042726	Trafd1	0.348188992	0.049006825	0.84783889	up	no	8.697217167	6.810826379	1868	1760	1625	1916	1403	1529	9.073914019	8.761035525	8.256701958	7.529633519	6.022240448	6.880605171	TRAF-type zinc finger domain-containing protein 1 [Source:UniProtKB/Swiss-Prot;Acc:Q3UDK1]
ENSMUSG00000020042	Btbd11	0.347884632	0.224106513	1	up	no	1.719038856	1.329283127	930	558	840	1101	577	476	2.013332018	1.240812672	1.902971879	1.93171188	1.103250834	0.952886668	Ankyrin repeat and BTB/POZ domain-containing protein BTBD11 [Source:UniProtKB/Swiss-Prot;Acc:Q6GQW0]
ENSMUSG00000078234	Klhdc7a	0.347518704	0.15233456	1	up	no	3.301024	2.572982667	1354	1104	1009	1095	1449	641	3.785269	3.164485	2.953318	2.478645	3.580155	1.660148	Kelch domain-containing protein 7A [Source:UniProtKB/Swiss-Prot;Acc:A2APT9]
ENSMUSG00000053214	Gm9899	0.347436782	0.129781091	1	up	no	1.38529748	1.067413069	352	373	427	361	333	351	1.237007778	1.345923556	1.572961105	1.026287602	1.034547381	1.141404225	predicted gene 9899 [Source:MGI Symbol;Acc:MGI:3708711]
ENSMUSG00000025239	Limd1	0.347034914	0.266930737	1	up	no	1.872568319	1.450829791	553	650	320	684	438	284	1.997862401	2.408241894	1.211600662	2.004003701	1.397706605	0.950779068	LIM domain-containing protein 1 [Source:UniProtKB/Swiss-Prot;Acc:Q9QXD8]
ENSMUSG00000025571	Tnrc6c	0.346549273	0.011341244	0.443153139	up	no	7.455663385	5.842249397	4451	4171	4239	3870	4113	3826	7.559700175	7.265371683	7.541918298	5.324150067	6.174731043	6.027867081	trinucleotide repeat containing 6C [Source:MGI Symbol;Acc:MGI:2443265]
ENSMUSG00000036036	Zfp57	0.346418417	0.267874859	1	up	no	0.783103578	0.594591253	157	117	131	97	115	147	0.891351802	0.678384321	0.779574611	0.441289265	0.563349424	0.77913507	zinc finger protein 57 [Source:MGI Symbol;Acc:MGI:99204]
ENSMUSG00000075410	Prcd	0.346410682	0.514562123	1	up	no	2.222843533	1.727005902	152	195	120	151	255	23	2.126353579	2.796639647	1.745537373	1.694837589	3.191955505	0.294224613	Progressive rod-cone deration protein homolog [Source:UniProtKB/Swiss-Prot;Acc:Q00LT2]
ENSMUSG00000054204	Alkal2	0.346244199	0.313514891	1	up	no	2.457614333	1.911894333	128	205	165	212	123	126	1.847399	3.034658	2.490786	2.480539	1.570476	1.684668	ALK and LTK ligand 2 [Source:UniProtKB/Swiss-Prot;Acc:Q80UG6]
ENSMUSG00000055762	Eef1d	0.346122927	0.050192795	0.855709266	up	no	6.836623203	5.357009642	1998	1904	2066	2274	1788	1483	6.702407082	6.551833222	7.255629305	6.172180282	5.294544845	4.604303797	eukaryotic translation elongation factor 1 delta [Source:HGNC Symbol;Acc:HGNC:3211]
ENSMUSG00000041025	Iffo2	0.34603007	0.068396756	0.934526082	up	no	3.986146658	3.11475973	966	1199	1157	1061	1135	862	3.388899574	4.31871203	4.25082837	3.017314189	3.519840711	2.80712429	Intermediate filament family orphan 2 [Source:UniProtKB/Swiss-Prot;Acc:Q8R2V2]
ENSMUSG00000054823	Nsd3	0.345746129	0.055211798	0.878612932	up	no	4.314902636	3.374090875	3363	3005	3208	2486	2697	3530	4.440120355	4.069247073	4.435340481	2.655826855	3.145310175	4.321135594	Histone-lysine N-methyltransferase NSD3 [Source:UniProtKB/Swiss-Prot;Acc:Q6P2L6]
ENSMUSG00000026812	Tsc1	0.345703673	0.029356197	0.689833456	up	no	4.93123438	3.859199392	2801	2457	2587	2496	2768	1961	5.160360551	4.641223101	4.992119487	3.726421074	4.504894444	3.346282658	Hamartin [Source:UniProtKB/Swiss-Prot;Acc:Q9EP53]
ENSMUSG00000043943	Naalad2	0.345666103	0.334056274	1	up	no	0.322479243	0.23246774	101	28	80	66	58	52	0.457593571	0.130167652	0.379676507	0.243785225	0.233527444	0.220090551	N-acetylated alpha-linked acidic dipeptidase 2 [Source:MGI Symbol;Acc:MGI:1919810]
ENSMUSG00000114953	4930519K11Rik	0.345317897	0.23826677	1	up	no	3.673929061	2.870589813	406	345	311	211	446	306	4.117709443	3.594802676	3.309275062	1.730775689	4.001097868	2.879895883	RIKEN cDNA 4930519K11 gene [Source:MGI Symbol;Acc:MGI:1925269]
ENSMUSG00000048897	Zfp710	0.345261186	0.062390161	0.908643835	up	no	3.403483683	2.657821326	1058	1047	1066	1069	1086	765	3.324777271	3.375894891	3.509778886	2.726570888	3.019281158	2.227611932	zinc finger protein 710 [Source:MGI Symbol;Acc:MGI:1921747]
ENSMUSG00000029167	Ppargc1a	0.345253186	0.048067779	0.842714983	up	no	6.032024927	4.726944958	1973	1568	1801	1538	1863	1500	6.530392407	5.324882451	6.240799923	4.123819927	5.450661462	4.606353486	Peroxisome proliferator-activated receptor gamma coactivator 1-alpha [Source:UniProtKB/Swiss-Prot;Acc:O70343]
ENSMUSG00000048582	Gja3	0.345051611	0.394332479	1	up	no	0.344363422	0.249838351	71	41	27	31	30	56	0.517912263	0.307385403	0.207792599	0.179468871	0.193058958	0.376987223	gap junction protein, alpha 3 [Source:MGI Symbol;Acc:MGI:95714]
ENSMUSG00000034575	Papd7	0.344988675	0.027282569	0.669227522	up	no	5.430573026	4.254298438	2250	2183	2072	1934	1999	2032	5.505383284	5.479266993	5.307068801	3.831613444	4.321286073	4.609995798	Non-canonical poly(A) RNA polymerase PAPD7 [Source:UniProtKB/Swiss-Prot;Acc:Q6PB75]
ENSMUSG00000039496	Cdnf	0.344953702	0.34805056	1	up	no	0.324185628	0.233975446	36	58	42	52	46	19	0.249481436	0.415241956	0.307833493	0.295456078	0.284124641	0.12234562	Cerebral dopamine neurotrophic factor [Source:UniProtKB/Swiss-Prot;Acc:Q8CC36]
ENSMUSG00000042451	Mybph	0.344699084	0.203955404	1	up	no	26.33479192	20.71666401	2133	3160	2918	3971	1679	2083	19.98764398	30.37826628	28.6384655	30.14451407	13.90381509	18.10166286	Mus musculus myosin binding protein H (Mybph), transcript variant 2, mRNA. [Source:RefSeq mRNA;Acc:NM_001357515]
ENSMUSG00000051435	Fhad1	0.344577585	0.266965285	1	up	no	1.386351927	1.070559413	372	408	369	419	477	160	1.317788173	1.481189057	1.360078551	1.198439579	1.490675892	0.522562768	Forkhead-associated domain-containing protein 1 [Source:UniProtKB/Swiss-Prot;Acc:A6PWD2]
ENSMUSG00000102222	Pcdhga10	0.34448101	0.163461152	1	up	no	2.610061	2.034420333	430	518	705	528	466	522	1.979365	2.448117	3.402701	1.972306	1.898734	2.232221	protocadherin gamma subfamily A, 10 [Source:HGNC Symbol;Acc:HGNC:8697]
ENSMUSG00000022526	Zfp251	0.343978923	0.09088391	1	up	no	10.14081069	7.968380375	2613	1706	1678	1882	1634	1983	12.99096082	8.69541285	8.736058411	7.579778888	7.17736803	9.147994207	zinc finger protein 251 [Source:MGI Symbol;Acc:MGI:1918841]
ENSMUSG00000014813	Stc1	0.343842037	0.221411927	1	up	no	1.13451	0.87272	261	186	195	192	240	148	1.355064	0.989486	1.05898	0.807268	1.100433	0.710459	stanniocalcin 1 [Source:MGI Symbol;Acc:MGI:109131]
ENSMUSG00000111686	Rab7-ps1	0.343791496	0.207147334	1	up	no	9.787079667	7.6907	229	292	295	285	248	225	8.032187	10.49506	10.833992	8.097899	7.682552	7.291649	RAB7, member RAS oncogene family, pseudogene 1 [Source:MGI Symbol;Acc:MGI:1276565]
ENSMUSG00000029307	Dmp1	0.34367513	0.274041947	1	up	no	1.346781333	1.040109	161	201	139	178	114	163	1.269285	1.622301	1.148758	1.138545	0.790098	1.191684	Dentin matrix acidic phosphoprotein 1 [Source:UniProtKB/Swiss-Prot;Acc:O55188]
ENSMUSG00000082925	Gm13135	0.34342484	0.31423194	1	up	no	0.657885333	0.497341	101	67	109	94	95	59	0.701993	0.475817	0.795846	0.530779	0.581548	0.379696	predicted gene 13135 [Source:MGI Symbol;Acc:MGI:3650404]
ENSMUSG00000073594	Gm10545	0.343406912	0.233048888	1	up	no	0.847548	0.646836333	191	193	183	128	166	208	0.835535	0.867014	0.840095	0.453451	0.641388	0.84567	_
ENSMUSG00000033499	Larp4b	0.343285182	0.147813383	1	up	no	8.686695888	6.826063336	3503	3010	3359	1766	3705	3490	9.030601032	7.961171216	9.068315418	3.688046862	8.443102003	8.347041144	La-related protein 4B [Source:UniProtKB/Swiss-Prot;Acc:Q6A0A2]
ENSMUSG00000073144	4930599N23Rik	0.343238315	0.398125905	1	up	no	1.20636	0.929764333	56	48	40	49	44	38	1.383878	1.221547	1.013655	0.974771	0.95815	0.856372	RIKEN cDNA 4930599N23 gene [Source:MGI Symbol;Acc:MGI:1922629]
ENSMUSG00000039701	Usp53	0.343077541	0.083340038	0.975853339	up	no	1.713054017	1.329335277	884	1025	988	829	1113	703	1.527834547	1.819958927	1.791368578	1.160256665	1.701663546	1.126085621	ubiquitin specific peptidase 53 [Source:MGI Symbol;Acc:MGI:2139607]
ENSMUSG00000017737	Mmp9	0.342749169	0.308972187	1	up	no	0.482945852	0.359674524	82	86	64	56	97	50	0.501048912	0.537748025	0.410040619	0.27626776	0.522365346	0.280390467	Matrix metalloproteinase-9 [Source:UniProtKB/Swiss-Prot;Acc:P41245]
ENSMUSG00000016552	Foxred2	0.342725609	0.11267121	1	up	no	2.801741729	2.188168837	660	836	740	569	782	689	2.417724761	3.14639184	2.841108585	1.689073318	2.533582335	2.341850858	FAD-dependent oxidoreductase domain-containing protein 2 [Source:UniProtKB/Swiss-Prot;Acc:Q3USW5]
ENSMUSG00000036052	Dnajb5	0.342412294	0.028006675	0.676642436	up	no	27.48299647	21.6552998	6691	7761	7426	7581	5806	6906	24.59109134	29.27196261	28.58593545	22.56617614	18.85870846	23.5410148	Mus musculus DnaJ heat shock protein family (Hsp40) member B5 (Dnajb5), transcript variant 3, mRNA. [Source:RefSeq mRNA;Acc:NM_001355440]
ENSMUSG00000097734	B930082K07Rik	0.342096453	0.348892843	1	up	no	0.502364333	0.375201667	66	34	69	39	52	55	0.576999	0.299099	0.630995	0.273512	0.403282	0.448811	RIKEN cDNA B930082K07 gene [Source:MGI Symbol;Acc:MGI:2445108]
ENSMUSG00000030878	Cdr2	0.342022148	0.23656924	1	up	no	3.452113684	2.702385848	736	1012	883	822	1202	416	2.824123177	3.983946066	3.54827181	2.552898469	4.077120513	1.477138563	Cerebellar deration-related protein 2 [Source:UniProtKB/Swiss-Prot;Acc:P97817]
ENSMUSG00000115842	AC154766.1	0.341884908	0.518661865	1	up	no	0.780819667	0.594975333	48	33	20	15	22	50	1.104712	0.771109	0.466638	0.27176	0.440902	1.072264	_
ENSMUSG00000102602	A930004J17Rik	0.341731965	0.356273927	1	up	no	0.307069667	0.221216	40	59	91	60	79	25	0.187872	0.285597	0.44774	0.228277	0.329503	0.105868	RIKEN cDNA A930004J17 gene [Source:MGI Symbol;Acc:MGI:2442442]
ENSMUSG00000035277	Arx	0.34152025	0.091224542	1	up	no	4.164346441	3.26546161	897	882	683	891	723	661	4.450536681	4.491774994	3.550727649	3.580182494	3.174623186	3.041579149	Homeobox protein ARX [Source:UniProtKB/Swiss-Prot;Acc:O35085]
ENSMUSG00000006720	Zfp184	0.341227656	0.417789435	1	up	no	0.501889742	0.375113294	99	110	33	98	82	35	0.607460143	0.693883826	0.204325258	0.489806166	0.443663322	0.191870394	zinc finger protein 184 (Kruppel-like) [Source:MGI Symbol;Acc:MGI:1922244]
ENSMUSG00000090357	Gm17077	0.341227639	0.36900415	1	up	no	9.221502333	7.258108	109	120	117	83	99	135	8.483926	9.611995	9.568586	5.217007	6.814378	9.742939	predicted gene 17077 [Source:MGI Symbol;Acc:MGI:4937904]
ENSMUSG00000021895	Arhgef3	0.341050513	0.012481497	0.465134858	up	no	23.31061718	18.38189203	4689	4784	4690	4499	4318	4290	22.59883752	23.66168462	23.6713294	17.56328624	18.3985829	19.18380695	Rho guanine nucleotide exchange factor 3 [Source:UniProtKB/Swiss-Prot;Acc:Q91X46]
ENSMUSG00000047606	Ankrd34c	0.340953804	0.304804388	1	up	no	0.268572433	0.190995	38	92	68	36	82	46	0.148455611	0.375462883	0.281798804	0.115831215	0.287622786	0.169530999	Ankyrin repeat domain-containing protein 34C [Source:UniProtKB/Swiss-Prot;Acc:Q8BLB8]
ENSMUSG00000114469	C730002L08Rik	0.340724349	0.384703223	1	up	no	0.490631	0.366388667	77	32	84	40	78	50	0.573769	0.245691	0.652433	0.241591	0.511659	0.345916	RIKEN cDNA C730002L08 gene [Source:MGI Symbol;Acc:MGI:2443493]
ENSMUSG00000029708	Gcc1	0.340426228	0.048694784	0.845090228	up	no	5.460291569	4.291562416	1279	1340	1257	1207	1191	1176	5.276129271	5.674898225	5.42984721	4.031882317	4.345239854	4.497565077	GRIP and coiled-coil domain-containing protein 1 [Source:UniProtKB/Swiss-Prot;Acc:Q9D4H2]
ENSMUSG00000032253	Phip	0.340413968	0.051231349	0.86003753	up	no	1.215704795	0.939162921	1711	2007	1738	1626	2046	1283	1.116272015	1.343868876	1.186973494	0.860742727	1.179873984	0.776872052	pleckstrin homology domain interacting protein [Source:HGNC Symbol;Acc:HGNC:15673]
ENSMUSG00000041870	Ankrd13a	0.340385538	0.029951892	0.694377057	up	no	9.322462662	7.3421457	2352	2769	2367	2445	2460	2037	8.575039557	10.35806449	9.034283935	7.219494499	7.92413957	6.882803031	Ankyrin repeat domain-containing protein 13A [Source:UniProtKB/Swiss-Prot;Acc:Q80UP5]
ENSMUSG00000031767	Nudt7	0.340374847	0.266334891	1	up	no	0.690545634	0.524401454	185	150	190	214	168	95	0.713881423	0.590556315	0.767199164	0.667198086	0.572282697	0.333723578	Peroxisomal coenzyme A diphosphatase NUDT7 [Source:UniProtKB/Swiss-Prot;Acc:Q99P30]
ENSMUSG00000109341	Gm30873	0.340261246	0.299661636	1	up	no	2.262385667	1.766044333	146	104	123	108	138	95	2.595407	1.89605	2.2957	1.55471	2.177017	1.566406	predicted gene, 30873 [Source:MGI Symbol;Acc:MGI:5590032]
ENSMUSG00000100799	1700027H10Rik	0.34010311	0.450039034	1	up	no	1.711548667	1.331096	55	30	51	58	40	27	2.02657	1.114151	1.993925	1.747691	1.310045	0.935552	RIKEN cDNA 1700027H10 gene [Source:MGI Symbol;Acc:MGI:1919524]
ENSMUSG00000030087	Klf15	0.339930189	0.058572228	0.892104302	up	no	11.13461112	8.776236409	1603	1327	1256	1397	1363	1116	12.51310541	10.62711945	10.2636085	8.835338828	9.412759769	8.08061063	Krueppel-like factor 15 [Source:UniProtKB/Swiss-Prot;Acc:Q9EPW2]
ENSMUSG00000033685	Ucp2	0.339739768	0.174293846	1	up	no	4.906286393	3.855886564	1642	1563	1411	1673	1871	761	5.123881792	4.995912186	4.599065201	4.220829875	5.154814373	2.192015443	uncoupling protein 2 (mitochondrial, proton carrier) [Source:MGI Symbol;Acc:MGI:109354]
ENSMUSG00000103697	Gm38020	0.339659498	0.349926233	1	up	no	0.462179667	0.34425	100	112	80	48	141	64	0.463548	0.535868	0.387123	0.180925	0.578074	0.273751	predicted gene, 38020 [Source:MGI Symbol;Acc:MGI:5611248]
ENSMUSG00000074579	Lekr1	0.339430501	0.236884802	1	up	no	0.256543057	0.18179496	70	85	95	96	48	67	0.208788374	0.261979046	0.298861751	0.234004167	0.124898701	0.186482012	leucine, glutamate and lysine rich 1 [Source:HGNC Symbol;Acc:HGNC:33765]
ENSMUSG00000060733	Ipmk	0.339253266	0.075588608	0.955612706	up	no	2.302401855	1.798979364	751	733	714	688	652	674	2.30397323	2.307734303	2.295498034	1.709701609	1.769935073	1.917301411	Mus musculus inositol polyphosphate multikinase (Ipmk), transcript variant 2, mRNA. [Source:RefSeq mRNA;Acc:NM_001347191]
ENSMUSG00000027593	Raly	0.339175871	0.055303404	0.878612932	up	no	16.47526816	13.00262924	2257	2549	2474	2758	1865	2168	14.94644311	17.3207475	17.15861387	14.79426719	10.90833506	13.30528549	hnRNP-associated with lethal yellow [Source:MGI Symbol;Acc:MGI:97850]
ENSMUSG00000022325	Pop1	0.339017313	0.235224189	1	up	no	1.77737362	1.38421334	321	299	294	328	179	327	1.835025192	1.748620958	1.74847471	1.521677381	0.899527292	1.731435348	processing of precursor 1, ribonuclease P/MRP family, (S. cerevisiae) [Source:MGI Symbol;Acc:MGI:1914974]
ENSMUSG00000048108	Tmem72	0.338913899	0.670578873	1	up	no	2.103223854	1.641948757	2027	1590	1250	1419	3068	18	2.574719795	2.072360826	1.662590941	1.459720376	3.444962743	0.021163154	Transmembrane protein 72 [Source:UniProtKB/Swiss-Prot;Acc:Q8C3K5]
ENSMUSG00000027540	Ptpn1	0.338824552	0.028361057	0.680790436	up	no	12.40408659	9.786797043	2844	3158	3201	2996	2616	2920	11.21634905	12.7763631	13.21954762	9.569622203	9.117043377	10.67372555	protein tyrosine phosphatase, non-receptor type 1 [Source:MGI Symbol;Acc:MGI:97805]
ENSMUSG00000091387	Gcnt4	0.338701047	0.201694828	1	up	no	0.844244333	0.646664	204	173	201	162	209	148	0.873188	0.760075	0.89947	0.560325	0.791073	0.588594	Beta-1,3-galactosyl-O-glycosyl-glycoprotein beta-1,6-N-acetylglucosaminyltransferase 4 [Source:UniProtKB/Swiss-Prot;Acc:E9Q649]
ENSMUSG00000046556	Zfp319	0.338577436	0.042637409	0.796859929	up	no	4.927464	3.875822667	1639	1659	1488	1509	1438	1466	4.944764	5.135832	4.701796	3.688576	3.835326	4.103566	zinc finger protein 319 [Source:MGI Symbol;Acc:MGI:1890618]
ENSMUSG00000050144	Slc25a44	0.338556712	0.025142476	0.644256184	up	no	29.73791732	23.49678202	4998	4737	4556	5209	4659	3473	30.4758213	29.64131316	29.09661752	25.73197343	25.11525656	19.64311609	solute carrier family 25, member 44 [Source:MGI Symbol;Acc:MGI:2444391]
ENSMUSG00000016024	Lbp	0.338528781	0.528403404	1	up	no	5.07577093	3.993244901	1208	1205	891	1033	1925	129	5.45092642	5.576031576	4.200354794	3.770895155	7.678262264	0.530577285	Lipopolysaccharide-binding protein [Source:UniProtKB/Swiss-Prot;Acc:Q61805]
ENSMUSG00000097517	Gm26695	0.338522383	0.25084293	1	up	no	3.214399333	2.521195667	172	205	165	166	153	177	2.983803	3.661785	2.99761	2.344642	2.356608	2.862337	predicted gene, 26695 [Source:MGI Symbol;Acc:MGI:5477189]
ENSMUSG00000074575	Kcng1	0.33847601	0.039882274	0.77466908	up	no	12.79396561	10.09753197	3042	2203	2511	2635	2435	2127	14.72015584	10.9390008	12.72274018	10.32924465	10.41858179	9.544769484	Potassium voltage-gated channel subfamily G member 1 [Source:UniProtKB/Swiss-Prot;Acc:A2BDX4]
ENSMUSG00000025894	Aasdhppt	0.338444854	0.178211599	1	up	no	6.875895407	5.417189583	912	874	845	525	898	976	6.982959843	6.86570718	6.779019198	3.249654531	6.072052047	6.929862171	L-aminoadipate-semialdehyde dehydrogenase-phosphopantetheinyl transferase [Source:UniProtKB/Swiss-Prot;Acc:Q9CQF6]
ENSMUSG00000086742	Gm16201	0.338163608	0.509022902	1	up	no	0.326802443	0.237621043	69	48	38	49	81	4	0.430203033	0.305561336	0.24464296	0.246005213	0.443591499	0.023266417	predicted gene 16201 [Source:MGI Symbol;Acc:MGI:3802153]
ENSMUSG00000061132	Blnk	0.338084526	0.235770234	1	up	no	0.698466063	0.531659277	191	146	228	177	207	124	0.688608202	0.540962034	0.865827954	0.51996577	0.662944697	0.412067363	B-cell linker protein [Source:UniProtKB/Swiss-Prot;Acc:Q9QUN3]
ENSMUSG00000030814	Bcl7c	0.33805196	0.084433272	0.979786452	up	no	2.383202965	1.864483737	859	702	758	809	684	643	2.58711475	2.172215638	2.390278507	1.976707515	1.818360912	1.798382785	Mus musculus B cell CLL/lymphoma 7C (Bcl7c), transcript variant 1, mRNA. [Source:RefSeq mRNA;Acc:NM_001347652]
ENSMUSG00000060512	0610040J01Rik	0.337819761	0.230908703	1	up	no	1.845739186	1.439539175	199	213	186	180	208	161	1.804280741	1.978108125	1.754828692	1.313462355	1.660705114	1.344450054	RIKEN cDNA 0610040J01 gene [Source:MGI Symbol;Acc:MGI:1923511]
ENSMUSG00000040511	Pvr	0.337637341	0.150125437	1	up	no	1.334852138	1.035450437	378	346	379	397	283	329	1.336609134	1.260173456	1.407773823	1.139089193	0.885538238	1.081723882	poliovirus receptor [Source:MGI Symbol;Acc:MGI:107741]
ENSMUSG00000027087	Itgav	0.337472271	0.04009441	0.77466908	up	no	3.452188248	2.711296791	1658	1742	1584	1498	1676	1417	3.364019914	3.627591552	3.364953279	2.462054022	3.006583642	2.665252709	Integrin alpha-V Integrin alpha-V heavy chain Integrin alpha-V light chain [Source:UniProtKB/Swiss-Prot;Acc:P43406]
ENSMUSG00000013997	Nit1	0.337338184	0.088073539	0.995492367	up	no	5.133300578	4.042159016	1182	1111	1114	1350	975	854	5.217370693	5.0331535	5.14937754	4.831307557	3.802382844	3.492786647	Deaminated glutathione amidase [Source:UniProtKB/Swiss-Prot;Acc:Q8VDK1]
ENSMUSG00000034853	Acot11	0.337300778	0.0411558	0.785381819	up	no	8.444521394	6.663166666	2228	2355	2279	1979	2525	1848	8.024658622	8.709021056	8.599884505	5.771975875	8.040140005	6.177384117	acyl-CoA thioesterase 11 [Source:MGI Symbol;Acc:MGI:1913736]
ENSMUSG00000029755	Dlx5	0.337299927	0.256812997	1	up	no	1.654401043	1.288645788	192	183	134	169	164	133	1.830836756	1.792097905	1.340268467	1.309779867	1.380132445	1.176025052	Homeobox protein DLX-5 [Source:UniProtKB/Swiss-Prot;Acc:P70396]
ENSMUSG00000048732	Klhl11	0.337132813	0.129075653	1	up	no	12.72742767	10.05435833	1577	1267	1251	927	1351	1469	14.381378	11.853727	11.947178	6.848183	10.893793	12.421099	Kelch-like protein 11 [Source:UniProtKB/Swiss-Prot;Acc:Q8CE33]
ENSMUSG00000024395	Lims2	0.336929679	0.110989559	1	up	no	6.61440452	5.215958264	710	798	824	883	683	613	5.892099271	6.791847128	7.159267161	5.93568865	5.003627451	4.70855869	LIM and senescent cell antigen-like-containing domain protein 2 [Source:UniProtKB/Swiss-Prot;Acc:Q91XD2]
ENSMUSG00000042190	Cmklr1	0.33685359	0.223973258	1	up	no	1.329254767	1.031635635	205	222	184	160	217	176	1.307817435	1.451817408	1.228129459	0.825436766	1.225272829	1.04419731	Mus musculus chemokine-like receptor 1 (Cmklr1), transcript variant 1, mRNA. [Source:RefSeq mRNA;Acc:NM_001359060]
ENSMUSG00000067931	Zfp948	0.336828523	0.185565027	1	up	no	2.521766667	1.975862333	267	302	316	291	315	212	2.223799	2.581997	2.759504	1.967717	2.322555	1.637315	zinc finger protein 948 [Source:MGI Symbol;Acc:MGI:3040683]
ENSMUSG00000071226	Cecr2	0.336713647	0.146606051	1	up	no	0.488632692	0.366104688	284	450	392	256	393	335	0.359656292	0.584808532	0.521433251	0.262439779	0.441272071	0.394602213	Cat eye syndrome critical region [Source:UniProtKB/Swiss-Prot;Acc:E9Q2Z1]
ENSMUSG00000021728	Emb	0.336441375	0.27712912	1	up	no	5.916443852	4.664978248	2290	1660	1554	1492	2785	821	7.230417042	5.379061573	5.139852942	3.816374103	7.775793555	2.402767084	Embigin [Source:UniProtKB/Swiss-Prot;Acc:P21995]
ENSMUSG00000003119	Cdk12	0.336079326	0.053420966	0.872891428	up	no	2.083944596	1.630101803	1107	1060	1124	991	1109	920	2.053012109	2.015300161	2.183521517	1.488377908	1.820480344	1.581447156	Cyclin-dependent kinase 12 [Source:UniProtKB/Swiss-Prot;Acc:Q14AX6]
ENSMUSG00000045598	Zfp553	0.335723285	0.080271455	0.966876492	up	no	6.408578488	5.057311549	993	1277	1149	1026	1084	1056	5.444637399	7.183283725	6.597814341	4.553105071	5.250962836	5.367866738	zinc finger protein 553 [Source:MGI Symbol;Acc:MGI:2384725]
ENSMUSG00000050390	C77080	0.335586964	0.113466199	1	up	no	2.348957379	1.84070482	697	589	539	612	604	467	2.631831829	2.280567656	2.134472651	1.8709878	2.016630171	1.634496489	Uncharacterized protein KIAA1522 [Source:UniProtKB/Swiss-Prot;Acc:A2A7S8]
ENSMUSG00000027115	Kif18a	0.335577701	0.218674724	1	up	no	0.091708627	0.051922711	46	55	24	5	35	41	0.096672869	0.123743083	0.054709928	0.007121258	0.067435168	0.081211709	Kinesin-like protein KIF18A [Source:UniProtKB/Swiss-Prot;Acc:Q91WD7]
ENSMUSG00000104850	Gm42901	0.335558488	0.317330992	1	up	no	0.413060333	0.306588667	64	58	55	56	60	40	0.43962	0.404075	0.395486	0.308091	0.359635	0.25204	predicted gene 42901 [Source:MGI Symbol;Acc:MGI:5663038]
ENSMUSG00000021782	Dlg5	0.335524117	0.020685386	0.582632285	up	no	7.170211291	5.661614662	2904	2650	2627	2577	2643	2363	7.461604157	6.982407141	7.066622574	5.359314681	6.00162874	5.623900564	Disks large homolog 5 [Source:UniProtKB/Swiss-Prot;Acc:E9Q9R9]
ENSMUSG00000064115	Cadm2	0.335184332	0.148886543	1	up	no	13.81213762	10.92791289	4523	5059	8508	4774	5736	6251	10.06129351	11.54861304	19.82650632	8.601919313	11.28167767	12.9001417	Cell adhesion molecule 2 [Source:UniProtKB/Swiss-Prot;Acc:Q8BLQ9]
ENSMUSG00000028619	Tceanc2	0.334924026	0.067721678	0.932145432	up	no	2.81022948	2.207305268	989	892	841	889	861	762	2.991477237	2.771429405	2.667781799	2.178126288	2.305318407	2.13847111	Transcription elongation factor A N-terminal and central domain-containing protein 2 [Source:UniProtKB/Swiss-Prot;Acc:Q8R2M0]
ENSMUSG00000041303	Gtf3c3	0.334702843	0.063356303	0.915757263	up	no	5.994272795	4.732438048	1211	1290	1460	1359	1199	1129	5.356597879	5.860389904	6.765830601	4.871703092	4.690937958	4.634673095	general transcription factor IIIC, polypeptide 3 [Source:MGI Symbol;Acc:MGI:2138383]
ENSMUSG00000070034	Sp110	0.334697366	0.237160283	1	up	no	0.154948964	0.102161898	42	73	30	36	52	25	0.131456841	0.235321648	0.098068405	0.090271964	0.143546606	0.072667123	Sp110 nuclear body protein [Source:UniProtKB/Swiss-Prot;Acc:Q8BVK9]
ENSMUSG00000026961	Lrrc26	0.334516894	0.371490706	1	up	no	1.462838667	1.139408667	82	72	81	78	92	47	1.502876	1.340306	1.545334	1.153231	1.478922	0.786073	Leucine-rich repeat-containing protein 26 [Source:UniProtKB/Swiss-Prot;Acc:Q91W20]
ENSMUSG00000084771	A230072E10Rik	0.334433807	0.196319309	1	up	no	1.092865163	0.84605579	351	308	262	207	330	292	1.22453355	1.099113861	0.954948079	0.583209893	1.01366415	0.941293327	RIKEN cDNA A230072E10 gene [Source:MGI Symbol;Acc:MGI:3603753]
ENSMUSG00000022376	Adcy8	0.334296577	0.084745132	0.980192632	up	no	2.276205621	1.78473685	787	796	908	876	812	622	2.103800685	2.183250957	2.541565221	1.896194815	1.91718319	1.540832546	Adenylate cyclase type 8 [Source:UniProtKB/Swiss-Prot;Acc:P97490]
ENSMUSG00000115700	AC130669.1	0.333632819	0.492259455	1	up	no	1.073320333	0.831071667	122	58	64	126	34	65	1.582534	0.768065	0.869362	1.326903	0.387004	0.779308	_
ENSMUSG00000009418	Nav1	0.333624685	0.110824116	1	up	no	6.993079854	5.528644394	6062	4996	5207	3311	6257	5328	7.641574285	6.462737349	6.874927927	3.38094863	6.974787404	6.230197148	Neuron navigator 1 [Source:UniProtKB/Swiss-Prot;Acc:Q8CH77]
ENSMUSG00000019841	Rev3l	0.333406071	0.074436513	0.953291103	up	no	3.535686701	2.785500963	1988	2140	2181	1536	2306	1958	3.25945133	3.602349104	3.74525967	2.038362924	3.3404662	2.977673765	DNA polymerase zeta catalytic subunit [Source:UniProtKB/Swiss-Prot;Acc:Q61493]
ENSMUSG00000004105	Angptl2	0.333353526	0.350176421	1	up	no	1.990097984	1.55888865	571	631	482	494	867	198	1.979472487	2.242291328	1.748530137	1.385958192	2.658675366	0.632032391	Angiopoietin-related protein 2 [Source:UniProtKB/Swiss-Prot;Acc:Q9R045]
ENSMUSG00000050052	Tdrp	0.333207835	0.087335208	0.992084023	up	no	3.463001198	2.728201935	779	700	709	743	652	633	3.614538914	3.328139992	3.446324687	2.789266725	2.674132832	2.721206248	testis development related protein [Source:MGI Symbol;Acc:MGI:1919398]
ENSMUSG00000087458	Gm13999	0.333158777	0.229119404	1	up	no	5.432504	4.291682667	253	234	221	211	252	194	5.685208	5.400884	5.21142	3.834502	5.005983	4.034563	_
ENSMUSG00000018126	Baiap2l2	0.333105932	0.371593606	1	up	no	0.596946875	0.4532543	88	46	88	61	83	56	0.697963311	0.366367105	0.726510209	0.381130103	0.574902866	0.40372993	Brain-specific angiosis inhibitor 1-associated protein 2-like protein 2 [Source:UniProtKB/Swiss-Prot;Acc:Q80Y61]
ENSMUSG00000021188	Trip11	0.332884112	0.087241178	0.992084023	up	no	4.436896733	3.502058746	2001	2107	1939	1502	2432	1640	4.298941997	4.647963621	4.363784582	2.613965095	4.62161237	3.270598771	thyroid hormone receptor interactor 11 [Source:MGI Symbol;Acc:MGI:1924393]
ENSMUSG00000048787	Dcun1d3	0.332857184	0.125641132	1	up	no	2.233685246	1.752858627	920	736	705	760	892	528	2.553006854	2.09798594	2.050062945	1.7104561	2.192310657	1.355809125	DCN1-like protein 3 [Source:UniProtKB/Swiss-Prot;Acc:Q8K0V2]
ENSMUSG00000036611	Eepd1	0.332681015	0.165208742	1	up	no	5.208905096	4.115586424	809	615	633	576	545	769	6.011271606	4.691346759	4.924096924	3.467958062	3.577482967	5.301318243	Endonuclease/exonuclease/phosphatase family domain-containing protein 1 [Source:UniProtKB/Swiss-Prot;Acc:Q3TGW2]
ENSMUSG00000048878	Hexim1	0.332517268	0.020322683	0.579018826	up	no	23.79103267	18.87305433	3827	3800	3537	3888	3137	3390	23.897926	24.347279	23.127893	19.667068	17.319273	19.632822	Protein HEXIM1 [Source:UniProtKB/Swiss-Prot;Acc:Q8R409]
ENSMUSG00000024778	Fas	0.332220068	0.412402259	1	up	no	0.832443454	0.640652169	53	81	69	48	98	37	0.634404836	1.003792587	0.859132939	0.468214053	1.04013857	0.413603883	Tumor necrosis factor receptor superfamily member 6 [Source:UniProtKB/Swiss-Prot;Acc:P25446]
ENSMUSG00000084230	Gm14388	0.332134078	0.452251108	1	up	no	2.623184	2.06319	37	63	68	53	44	59	1.68656	2.956751	3.226241	1.948219	1.775102	2.466249	predicted gene 14388 [Source:MGI Symbol;Acc:MGI:3650926]
ENSMUSG00000025578	Cbx8	0.332010888	0.139467736	1	up	no	3.213665996	2.53247039	574	542	473	497	442	527	3.405741575	3.296978475	2.938277937	2.385595264	2.31593927	2.895876636	Chromobox protein homolog 8 [Source:UniProtKB/Swiss-Prot;Acc:Q9QXV1]
ENSMUSG00000051116	Gm8121	0.331933564	0.369336833	1	up	no	5.715887667	4.520554	134	112	137	170	110	82	5.854405	5.022638	6.27062	6.006496	4.243391	3.311775	predicted pseudogene 8121 [Source:MGI Symbol;Acc:MGI:3645325]
ENSMUSG00000036412	Arsi	0.331797126	0.428660892	1	up	no	0.419740333	0.312957667	32	36	99	56	44	48	0.23458	0.267004	0.757637	0.331863	0.282537	0.324473	Arylsulfatase I [Source:UniProtKB/Swiss-Prot;Acc:Q32KI9]
ENSMUSG00000052544	St6galnac3	0.331663676	0.087316403	0.992084023	up	no	1.976062766	1.54968021	743	831	813	669	795	726	1.800330961	2.064839936	2.063017401	1.314831554	1.70250049	1.631708584	ST6 (alpha-N-acetyl-neuraminyl-2,3-beta-galactosyl-1,3)-N-acetylgalactosaminide alpha-2,6-sialyltransferase 3 [Source:MGI Symbol;Acc:MGI:1341828]
ENSMUSG00000035597	Prpf39	0.331629379	0.165551701	1	up	no	1.2749521	0.992589891	478	712	858	621	737	524	0.866589864	1.32500958	1.633256855	0.91372208	1.18335545	0.880692144	pre-mRNA processing factor 39 [Source:HGNC Symbol;Acc:HGNC:20314]
ENSMUSG00000027894	Slc6a17	0.331444919	0.125284648	1	up	no	25.19932634	20.00638964	13383	9809	11626	7090	13227	11693	28.40235392	21.3597869	25.8358382	12.18506217	24.81921036	23.01489641	Sodium-dependent neutral amino acid transporter SLC6A17 [Source:UniProtKB/Swiss-Prot;Acc:Q8BJI1]
ENSMUSG00000110234	Gm45799	0.331279421	0.318030416	1	up	no	0.473681677	0.355980149	77	94	91	72	108	54	0.410441606	0.503838404	0.506765021	0.304587553	0.501638052	0.261714842	predicted gene 45799 [Source:MGI Symbol;Acc:MGI:5804914]
ENSMUSG00000081094	Rpl19-ps11	0.331019951	0.380236102	1	up	no	6.434834667	5.095025333	105	214	190	200	119	159	3.853915	8.102885	7.347704	5.981959	3.880868	5.422249	ribosomal protein L19, pseudogene 11 [Source:MGI Symbol;Acc:MGI:3642193]
ENSMUSG00000031976	Urb2	0.330816739	0.120088562	1	up	no	2.69520457	2.122428696	872	643	718	792	756	525	3.089905468	2.334580323	2.661127919	2.275272278	2.36745133	1.724562481	URB2 ribosome biogenesis 2 homolog (S. cerevisiae) [Source:MGI Symbol;Acc:MGI:2681124]
ENSMUSG00000115923	AC112943.2	0.330792225	0.25305938	1	up	no	10.207832	8.095754667	341	239	245	201	296	264	12.370131	8.919993	9.333372	5.894588	9.503852	8.888824	_
ENSMUSG00000096934	Gm26658	0.330671036	0.166278529	1	up	no	4.588902	3.628458	580	471	491	420	457	544	5.059305	4.21804	4.489361	2.964485	3.522202	4.398687	predicted gene, 26658 [Source:MGI Symbol;Acc:MGI:5477152]
ENSMUSG00000052783	Grk4	0.330539109	0.281337068	1	up	no	0.379189926	0.281070643	78	89	82	99	73	48	0.35013991	0.405059634	0.382370234	0.35894591	0.289399172	0.194866847	G protein-coupled receptor kinase 4 [Source:UniProtKB/Swiss-Prot;Acc:O70291]
ENSMUSG00000031860	Pbx4	0.330506879	0.229682855	1	up	no	2.321760265	1.82592187	264	196	239	222	207	216	2.576052493	1.954532405	2.434695898	1.741126916	1.779592325	1.957046369	Mus musculus pre B cell leukemia homeobox 4 (Pbx4), transcript variant 4, mRNA. [Source:RefSeq mRNA;Acc:NM_001357308]
ENSMUSG00000003271	Sult2b1	0.330497644	0.23253536	1	up	no	2.355254786	1.852571122	553	315	392	475	298	393	3.038748206	1.77214392	2.254872232	2.10926361	1.448626538	1.99982322	Sulfotransferase family cytosolic 2B member 1 [Source:UniProtKB/Swiss-Prot;Acc:O35400]
ENSMUSG00000104195	B230377A18Rik	0.330470192	0.433125175	1	up	no	1.766703826	1.384547086	101	173	54	103	119	79	1.587193512	2.821321813	0.891596152	1.32604679	1.661975162	1.165619307	RIKEN cDNA B230377A18 gene [Source:MGI Symbol;Acc:MGI:3704260]
ENSMUSG00000091133	Gm17108	0.330379403	0.345884255	1	up	no	0.878477667	0.67821	91	143	106	111	77	120	0.687349	1.107246	0.840838	0.680907	0.509949	0.843774	predicted gene 17108 [Source:MGI Symbol;Acc:MGI:4937935]
ENSMUSG00000037580	Gch1	0.330138893	0.301201382	1	up	no	0.480375324	0.361665297	176	109	123	96	92	167	0.610215804	0.386563856	0.444346313	0.269037976	0.280222714	0.5357352	GTP cyclohydrolase 1 [Source:UniProtKB/Swiss-Prot;Acc:Q05915]
ENSMUSG00000022280	Rnf19a	0.330114222	0.029747485	0.694377057	up	no	12.66823086	10.05678931	2566	2608	2369	2622	2244	2181	12.62779563	13.16873706	12.20815989	10.45290193	9.762798349	9.954667649	E3 ubiquitin-protein ligase RNF19A [Source:UniProtKB/Swiss-Prot;Acc:P50636]
ENSMUSG00000116081	AC165278.1	0.330013382	0.171369805	1	up	no	3.022402	2.383961667	348	336	311	343	287	293	3.096298	3.067782	2.903126	2.475157	2.259063	2.417665	_
ENSMUSG00000030313	Dennd5b	0.329894478	0.025270819	0.644504759	up	no	3.263140571	2.575696724	2677	2724	2527	2348	2628	2353	3.228913709	3.369195806	3.191312199	2.293125469	2.801523983	2.632440719	DENN domain-containing protein 5B [Source:UniProtKB/Swiss-Prot;Acc:A2RSQ0]
ENSMUSG00000009551	6330409D20Rik	0.329883274	0.411653849	1	up	no	0.678823724	0.519632818	38	52	43	37	36	46	0.556714245	0.798389065	0.681367862	0.448381767	0.469902872	0.640613816	RIKEN cDNA 6330409D20 gene [Source:MGI Symbol;Acc:MGI:1917980]
ENSMUSG00000017679	Ttpal	0.329859846	0.142524902	1	up	no	1.306535209	1.019058783	370	357	325	341	307	316	1.349693228	1.32883967	1.24107273	1.001975679	0.985179205	1.070021466	tocopherol (alpha) transfer protein-like [Source:MGI Symbol;Acc:MGI:1923330]
ENSMUSG00000028832	Stmn1	0.329847392	0.022211556	0.611455625	up	no	122.2583172	97.25080267	11055	9872	10616	9658	9240	10462	125.5180365	114.9998275	126.2570876	88.83112533	92.74095003	110.1803326	stathmin 1 [Source:MGI Symbol;Acc:MGI:96739]
ENSMUSG00000035948	Acss3	0.329232052	0.425202476	1	up	no	0.519008675	0.392706183	159	196	151	103	302	42	0.47753529	0.601024606	0.47846613	0.253073679	0.807506436	0.117538435	Acyl-CoA synthetase short-chain family member 3, mitochondrial [Source:UniProtKB/Swiss-Prot;Acc:Q14DH7]
ENSMUSG00000046982	Tshz1	0.329173273	0.107686001	1	up	no	4.520326667	3.577745333	1290	1155	993	1166	1266	775	4.978138	4.572923	4.009919	3.64377	4.31766	2.771806	Teashirt homolog 1 [Source:UniProtKB/Swiss-Prot;Acc:Q5DTH5]
ENSMUSG00000035898	Uba6	0.328848824	0.068238606	0.93452484	up	no	2.338390028	1.841376703	878	788	898	848	811	715	2.344320388	2.158287377	2.512562319	1.837087388	1.915060373	1.771982347	ubiquitin-like modifier activating enzyme 6 [Source:MGI Symbol;Acc:MGI:1913894]
ENSMUSG00000026604	Ptpn14	0.328841728	0.096242178	1	up	no	1.694583248	1.328803105	1205	973	884	917	1154	746	1.958965011	1.622459199	1.502325533	1.205880506	1.657467457	1.123061351	Tyrosine-protein phosphatase non-receptor type 14 [Source:UniProtKB/Swiss-Prot;Acc:Q62130]
ENSMUSG00000032501	Trib1	0.328836698	0.131468118	1	up	no	2.194105076	1.726516484	506	647	686	620	541	544	1.763381603	2.312851985	2.506081638	1.750681349	1.668767536	1.760100566	Tribbles homolog 1 [Source:UniProtKB/Swiss-Prot;Acc:Q8K4K4]
ENSMUSG00000037926	Ssh2	0.328749604	0.036518395	0.747663682	up	no	2.935184719	2.31669384	2702	2423	2186	2124	2579	2052	3.182822001	2.927656553	2.695075602	2.026541923	2.683976717	2.23956288	Protein phosphatase Slingshot homolog 2 [Source:UniProtKB/Swiss-Prot;Acc:Q5SW75]
ENSMUSG00000041193	Pla2g5	0.32867157	0.527261364	1	up	no	1.492037243	1.167690459	214	204	163	227	289	30	1.612038477	1.579028178	1.285045073	1.380341486	1.918402513	0.204327379	phospholipase A2, group V [Source:MGI Symbol;Acc:MGI:101899]
ENSMUSG00000026924	Sec16a	0.328502599	0.042321788	0.79520023	up	no	5.955314658	4.722226216	2256	2388	2699	2416	2116	2313	5.351711233	5.810976176	6.703256564	4.642709352	4.436848439	5.087120856	SEC16 homolog A, endoplasmic reticulum export factor [Source:HGNC Symbol;Acc:HGNC:29006]
ENSMUSG00000034463	Scara3	0.328483673	0.076914114	0.959234964	up	no	7.980222667	6.334871667	1171	1452	1227	1227	1139	1221	7.105226	9.040298	7.795144	6.029284	6.108096	6.867235	Scavenger receptor class A member 3 [Source:UniProtKB/Swiss-Prot;Acc:Q8C850]
ENSMUSG00000052423	B4galt3	0.328469171	0.067228387	0.931750237	up	no	6.630376013	5.259944033	1947	1469	1469	1705	1489	1363	7.749636229	6.007479711	6.134012101	5.505536387	5.245794574	5.028501137	Beta-1,4-galactosyltransferase 3 N-acetyllactosamine synthase Beta-N-acetylglucosaminylglycopeptide beta-1,4-galactosyltransferase Beta-N-acetylglucosaminyl-glycolipid beta-1,4-galactosyltransferase [Source:UniProtKB/Swiss-Prot;Acc:Q91YY2]
ENSMUSG00000051726	Kcnf1	0.328294773	0.023961667	0.632906475	up	no	16.81314067	13.37093333	4004	3176	3634	3714	3406	3000	18.245529	14.851308	17.342585	13.709386	13.721452	12.681962	potassium voltage-gated channel modifier subfamily F member 1 [Source:HGNC Symbol;Acc:HGNC:6246]
ENSMUSG00000004730	Adgre1	0.328203461	0.193541747	1	up	no	2.058545577	1.619341463	304	270	324	269	329	233	2.039146732	1.856858	2.279632	1.461791132	1.95124	1.444993258	Mus musculus adhesion G protein-coupled receptor E1 (Adgre1), transcript variant 2, mRNA. [Source:RefSeq mRNA;Acc:NM_001355722]
ENSMUSG00000096923	A730071L15Rik	0.328033319	0.196727937	1	up	no	4.385014667	3.47286	380	286	288	285	328	271	5.12823	3.953854	4.07296	3.111032	3.91311	3.394438	RIKEN cDNA A730071L15Rik gene [Source:MGI Symbol;Acc:MGI:3642498]
ENSMUSG00000024039	Cbs	0.32799202	0.089476079	1	up	no	5.90306193	4.682306288	833	971	849	918	851	713	5.42145588	6.493785421	5.793944489	4.843897503	4.900728129	4.302293231	Cystathionine beta-synthase [Source:UniProtKB/Swiss-Prot;Acc:Q91WT9]
ENSMUSG00000001151	Pcnt	0.327990957	0.060600957	0.90275484	up	no	2.900826404	2.29059362	1699	1668	1378	1340	1560	1475	3.044529791	3.069971535	2.587977886	1.945869981	2.474409096	2.451501781	pericentrin [Source:HGNC Symbol;Acc:HGNC:16068]
ENSMUSG00000033594	Spata2l	0.327875441	0.060276107	0.902649713	up	no	13.25581331	10.54069505	2385	2234	1788	2259	1761	1963	14.48609556	13.9172897	11.36405466	11.11410927	9.450630695	11.05734519	spermatogenesis associated 2-like [Source:MGI Symbol;Acc:MGI:1926029]
ENSMUSG00000036391	Sec24a	0.327873287	0.108576598	1	up	no	1.363727922	1.066166773	646	727	593	551	599	643	1.315082596	1.516299058	1.259802111	0.906932527	1.075900732	1.215667061	Protein transport protein Sec24A [Source:UniProtKB/Swiss-Prot;Acc:Q3U2P1]
ENSMUSG00000040225	Prrc2c	0.327865027	0.049391394	0.850967417	up	no	8.810307517	6.998972362	7413	6914	4771	5974	6121	5654	10.04806575	9.615544636	6.767312165	6.557363298	7.333943235	7.105610553	Protein PRRC2C [Source:UniProtKB/Swiss-Prot;Acc:Q3TLH4]
ENSMUSG00000035824	Tk2	0.32784334	0.310453884	1	up	no	6.6653964	5.29017132	1278	1305	634	642	886	1401	7.793790556	8.171319522	4.031079123	3.166810091	4.768830073	7.934873795	thymidine kinase 2, mitochondrial [Source:MGI Symbol;Acc:MGI:1913266]
ENSMUSG00000002489	Tiam1	0.327709035	0.064460124	0.920689429	up	no	9.573163628	7.607584323	5428	3988	3368	3719	3981	4138	11.9500366	9.006516201	7.762938084	6.631420055	7.744274363	8.447058552	T cell lymphoma invasion and metastasis 1 [Source:MGI Symbol;Acc:MGI:103306]
ENSMUSG00000034342	Cbl	0.327698247	0.017555595	0.547690146	up	no	7.226164853	5.737537522	4256	3971	3760	3735	4026	3403	7.521090466	7.200098526	6.957305569	5.346121453	6.290316516	5.576174596	E3 ubiquitin-protein ligase CBL [Source:UniProtKB/Swiss-Prot;Acc:P22682]
ENSMUSG00000043843	Tmem145	0.327543572	0.114678258	1	up	no	6.469673447	5.135321333	939	722	726	868	713	650	7.465847994	5.893476653	6.049695695	5.598790336	5.013008821	4.794164843	transmembrane protein 145 [Source:HGNC Symbol;Acc:HGNC:26912]
ENSMUSG00000084658	Gm22721	0.327496756	0.48878866	1	up	no	11.07880467	8.808591	35	47	43	47	38	33	8.958652	12.574315	11.703447	9.966548	8.608185	7.85104	predicted gene, 22721 [Source:MGI Symbol;Acc:MGI:5452498]
ENSMUSG00000078495	Zfp984	0.327185113	0.334339283	1	up	no	0.793952475	0.612560753	87	102	122	92	122	70	0.647698911	0.778865222	0.955293294	0.552907396	0.804092621	0.480682241	zinc finger protein 984 [Source:MGI Symbol;Acc:MGI:3651978]
ENSMUSG00000014773	Dll1	0.32694293	0.172082586	1	up	no	1.572388587	1.233268339	287	332	278	277	296	254	1.478464809	1.748296158	1.490404794	1.151082066	1.339297463	1.209425489	Delta-like protein 1 Dll1-soluble form Dll1-derived cell-associated form Dll1-intracellular form [Source:UniProtKB/Swiss-Prot;Acc:Q61483]
ENSMUSG00000036368	Rmdn2	0.326633761	0.250861008	1	up	no	0.929279284	0.720742027	143	185	202	160	157	166	0.733674707	0.973653558	1.080509588	0.661954025	0.709324321	0.790947734	Regulator of microtubule dynamics protein 2 [Source:UniProtKB/Swiss-Prot;Acc:Q8BSE0]
ENSMUSG00000047832	Cdca4	0.326618715	0.199297942	1	up	no	1.509633674	1.183527029	237	270	347	269	272	246	1.222146822	1.426251287	1.880502913	1.125435009	1.246837378	1.178308701	Mus musculus cell division cycle associated 4 (Cdca4), transcript variant 2, mRNA. [Source:RefSeq mRNA;Acc:NM_001359234]
ENSMUSG00000059991	Nptx2	0.326601694	0.121381771	1	up	no	17.80917233	14.18099967	1499	2275	2268	1938	1655	2060	12.898727	20.085438	20.443352	13.511462	12.590714	16.440823	Neuronal pentraxin-2 [Source:UniProtKB/Swiss-Prot;Acc:O70340]
ENSMUSG00000028883	Sema3a	0.325896006	0.320680742	1	up	no	0.21466306	0.151039054	110	132	158	82	214	37	0.172269322	0.212023232	0.259696627	0.104442488	0.295997625	0.052677047	Semaphorin-3A [Source:UniProtKB/Swiss-Prot;Acc:O08665]
ENSMUSG00000040928	S100pbp	0.325360966	0.161122509	1	up	no	3.263489996	2.58439691	1390	1720	1048	1293	1688	891	3.200761345	4.067792254	2.52191639	2.411475172	3.438322917	1.903392643	S100P binding protein [Source:MGI Symbol;Acc:MGI:1921898]
ENSMUSG00000023011	Faim2	0.325356393	0.09076127	1	up	no	26.43856768	21.08046284	16523	14224	13737	17872	15290	8937	28.79880535	25.43987015	25.07702756	25.23614149	23.56031322	14.4449338	Protein lifeguard 2 [Source:UniProtKB/Swiss-Prot;Acc:Q8K097]
ENSMUSG00000079419	Ms4a6c	0.325348799	0.384773172	1	up	no	0.479051321	0.36214399	53	52	31	34	40	45	0.549398127	0.555304575	0.332451261	0.291172044	0.366647159	0.428612766	Membrane-spanning 4-domains subfamily A member 6C [Source:UniProtKB/Swiss-Prot;Acc:Q99N08]
ENSMUSG00000053113	Socs3	0.325295048	0.310146991	1	up	no	0.629521558	0.482256792	92	84	70	68	76	76	0.690274001	0.648054403	0.55023627	0.413183012	0.502110193	0.531477172	suppressor of cytokine signaling 3 [Source:MGI Symbol;Acc:MGI:1201791]
ENSMUSG00000056749	Nfil3	0.325125144	0.223899255	1	up	no	4.522017	3.589428667	510	396	329	504	324	330	5.490972	4.372992	3.702087	4.39488	3.080558	3.292848	Nuclear factor interleukin-3-regulated protein [Source:UniProtKB/Swiss-Prot;Acc:O08750]
ENSMUSG00000086193	Gm11508	0.324798806	0.341426158	1	up	no	5.986527	4.759542333	130	118	107	123	112	98	6.441372	5.979222	5.538987	4.902427	4.906178	4.470022	predicted gene 11508 [Source:MGI Symbol;Acc:MGI:3650928]
ENSMUSG00000039676	Capsl	0.324411368	0.356507417	1	up	no	3.867087018	3.06821156	176	174	145	142	225	96	4.040613	4.105754	3.454894055	2.62124825	4.553855431	2.029531	Calcyphosin-like protein [Source:UniProtKB/Swiss-Prot;Acc:Q6P8Y1]
ENSMUSG00000031530	Dusp4	0.324033991	0.094617806	1	up	no	10.13568133	8.076601	1085	1228	1407	1091	1230	1156	8.636847	10.034092	11.736105	7.034015	8.660349	8.535439	Dual specificity protein phosphatase 4 [Source:UniProtKB/Swiss-Prot;Acc:Q8BFV3]
ENSMUSG00000022176	Rem2	0.323877213	0.121058458	1	up	no	7.48182964	5.957274648	782	703	778	767	613	737	7.569919415	6.98214237	7.893427135	6.01600338	5.240488327	6.615332236	RRAD and GEM like GTPase 2 [Source:HGNC Symbol;Acc:HGNC:20248]
ENSMUSG00000079470	Utp14b	0.323828029	0.166036565	1	up	no	1.614955507	1.270158809	574	499	592	430	675	428	1.630261305	1.452732683	1.761872533	0.987518248	1.695537712	1.127420466	UTP14B small subunit processome component [Source:MGI Symbol;Acc:MGI:2445092]
ENSMUSG00000057286	St6galnac2	0.323748942	0.284308167	1	up	no	1.342804945	1.052788086	301	439	310	339	458	179	1.124809659	1.690167294	1.213437882	1.023866692	1.517855037	0.616642529	ST6 (alpha-N-acetyl-neuraminyl-2,3-beta-galactosyl-1,3)-N-acetylgalactosaminide alpha-2,6-sialyltransferase 2 [Source:MGI Symbol;Acc:MGI:107553]
ENSMUSG00000033632	AW554918	0.323649354	0.160885488	1	up	no	1.436437258	1.127684199	441	394	522	369	472	407	1.366793492	1.251397856	1.691120426	0.924627266	1.289875905	1.168549426	Protein hinderin [Source:UniProtKB/Swiss-Prot;Acc:Q6NZK5]
ENSMUSG00000032477	Cdc25a	0.323436517	0.204748036	1	up	no	0.697218754	0.537108521	319	192	249	250	210	227	0.858890784	0.532014674	0.700750803	0.545482202	0.497565373	0.568277987	M-phase inducer phosphatase 1 [Source:UniProtKB/Swiss-Prot;Acc:P48964]
ENSMUSG00000092258	Gm20444	0.32343058	0.383430403	1	up	no	15.810817	12.61540433	433	468	475	485	661	159	14.551979	16.158642	16.72183	13.229708	19.66325	4.953255	predicted gene 20444 [Source:MGI Symbol;Acc:MGI:5141909]
ENSMUSG00000053819	Camk2d	0.323344033	0.131438243	1	up	no	0.916410777	0.712330965	1162	718	924	689	1100	750	1.117699193	0.702637414	0.928895724	0.533930688	0.936278904	0.666783304	Mus musculus calcium/calmodulin-dependent protein kinase II, delta (Camk2d), transcript variant 8, mRNA. [Source:RefSeq mRNA;Acc:NM_001346635]
ENSMUSG00000044641	Pard6b	0.323110702	0.29958099	1	up	no	1.604734333	1.26267	324	249	164	305	204	176	2.07947	1.638241	1.096492	1.583066	1.157743	1.047201	Partitioning defective 6 homolog beta [Source:UniProtKB/Swiss-Prot;Acc:Q9JK83]
ENSMUSG00000074825	Itpripl1	0.323040882	0.460537844	1	up	no	1.471079856	1.155894807	316	243	184	244	384	64	1.8413329	1.452484881	1.119421785	1.15010552	1.975773608	0.341805293	Mus musculus inositol 1,4,5-triphosphate receptor interacting protein-like 1 (Itpripl1), transcript variant 3, mRNA. [Source:RefSeq mRNA;Acc:NM_001355634]
ENSMUSG00000024846	Cst6	0.32298737	0.382830738	1	up	no	0.488698333	0.370613	114	88	60	73	52	106	0.628454	0.495353	0.342288	0.322201	0.250577	0.539061	cystatin E/M [Source:MGI Symbol;Acc:MGI:1920970]
ENSMUSG00000033863	Klf9	0.322889201	0.027535121	0.669227522	up	no	55.63207733	44.45596933	8393	8347	7633	6971	8037	7748	56.13887	57.28788	53.469482	37.772625	47.52404	48.071243	Kruppel like factor 9 [Source:HGNC Symbol;Acc:HGNC:1123]
ENSMUSG00000097417	Gm26669	0.322868551	0.215571948	1	up	no	6.049274333	4.816213667	498	392	577	434	591	349	6.009921	4.847383	7.290519	4.241128	6.305818	3.901695	predicted gene, 26669 [Source:MGI Symbol;Acc:MGI:5477163]
ENSMUSG00000046747	Gm9812	0.322797495	0.460154022	1	up	no	2.985365	2.366805	179	159	55	76	158	124	4.015988	3.66653	1.273577	1.380255	3.135689	2.584471	predicted gene 9812 [Source:MGI Symbol;Acc:MGI:3708566]
ENSMUSG00000056608	Chd9	0.322717335	0.022677314	0.616981941	up	no	5.242635671	4.171770983	5725	5601	4991	4804	5174	5197	5.393111398	5.413018456	4.92177716	3.666505666	4.307146014	4.54166127	Chromodomain-helicase-DNA-binding protein 9 [Source:UniProtKB/Swiss-Prot;Acc:Q8BYH8]
ENSMUSG00000027489	Necab3	0.322538091	0.137547787	1	up	no	6.348727984	5.056801542	824	678	679	777	563	701	7.038963563	5.937993264	6.069227126	5.371519933	4.2445446	5.554340091	N-terminal EF-hand calcium-binding protein 3 [Source:UniProtKB/Swiss-Prot;Acc:Q9D6J4]
ENSMUSG00000097245	Gm5421	0.322525752	0.29008953	1	up	no	1.436978667	1.129073667	140	147	167	159	117	145	1.292488	1.398263	1.620185	1.190084	0.956948	1.240189	predicted gene 5421 [Source:MGI Symbol;Acc:MGI:3645718]
ENSMUSG00000040260	Daam2	0.322524813	0.038077645	0.755848208	up	no	8.514144073	6.788465506	3168	4311	3670	3621	3696	3148	7.07556915	9.88018055	8.586682519	6.550454627	7.295795137	6.519146755	Disheveled-associated activator of morphosis 2 [Source:UniProtKB/Swiss-Prot;Acc:Q80U19]
ENSMUSG00000019732	Calr3	0.322488173	0.415844682	1	up	no	0.572459074	0.437758452	43	71	39	60	42	37	0.46172766	0.802479009	0.453170555	0.53450308	0.405253885	0.373518392	Calreticulin-3 [Source:UniProtKB/Swiss-Prot;Acc:Q9D9Q6]
ENSMUSG00000109836	Gm45884	0.322406544	0.153475547	1	up	no	12.05263833	9.618887	1936	1850	1744	1332	2475	1348	12.365823	12.124866	11.667226	6.892182	13.977291	7.987188	predicted gene 45884 [Source:MGI Symbol;Acc:MGI:5804999]
ENSMUSG00000041757	Plekha6	0.322355556	0.087712478	0.994054416	up	no	3.596803363	2.85656655	2384	1807	1877	1541	2209	1862	4.146583098	3.224423174	3.419403817	2.169236844	3.397788007	3.0026748	Pleckstrin homology domain-containing family A member 6 [Source:UniProtKB/Swiss-Prot;Acc:Q7TQG1]
ENSMUSG00000038390	Gpr162	0.322039171	0.028327443	0.680790436	up	no	37.43249889	29.92368745	7046	6103	6152	6688	5404	6033	40.05847951	35.60203968	36.63697748	30.80366761	27.15562139	31.81177334	G protein-coupled receptor 162 [Source:MGI Symbol;Acc:MGI:1315214]
ENSMUSG00000089824	Rbm12	0.321985898	0.268679512	1	up	no	2.239037887	1.771155339	511	468	1022	611	605	648	1.663329911	1.564592846	3.489190904	1.612522894	1.742134858	1.958808264	RNA-binding protein 12 [Source:UniProtKB/Swiss-Prot;Acc:Q8R4X3]
ENSMUSG00000040820	Hlcs	0.321784621	0.122309272	1	up	no	1.315007154	1.032118305	603	507	474	542	466	452	1.466542606	1.270678258	1.207800598	1.070916645	1.003730496	1.021707775	holocarboxylase synthetase (biotin- [propriony-Coenzyme A-carboxylase (ATP-hydrolysing)] ligase) [Source:MGI Symbol;Acc:MGI:894646]
ENSMUSG00000038290	Smg6	0.321752658	0.040249512	0.774744824	up	no	5.512159864	4.390273891	2241	1973	2046	2002	2073	1778	5.782735223	5.225602092	5.528142278	4.184969614	4.729317188	4.256534871	Smg-6 homolog, nonsense mediated mRNA decay factor (C. elegans) [Source:MGI Symbol;Acc:MGI:2144117]
ENSMUSG00000032515	Csrnp1	0.321678845	0.197999792	1	up	no	3.240615101	2.572953838	415	557	538	554	378	484	2.600535519	3.585881246	3.535428538	2.816047622	2.085229327	2.817584566	Mus musculus cysteine-serine-rich nuclear protein 1 (Csrnp1), transcript variant 3, mRNA. [Source:RefSeq mRNA;Acc:NM_001357561]
ENSMUSG00000020364	Zfp354a	0.321675056	0.234503483	1	up	no	1.335072385	1.048259287	204	303	271	290	226	208	1.015095449	1.561345928	1.428775777	1.175337462	0.998529507	0.970910892	zinc finger protein 354A [Source:MGI Symbol;Acc:MGI:103172]
ENSMUSG00000045576	St7l	0.321461404	0.101559196	1	up	no	2.283757695	1.807623144	1178	1068	1174	1353	889	962	2.305107041	2.14162323	2.404542814	2.145929411	1.535375912	1.741564108	Suppressor of tumorigenicity 7 protein-like [Source:UniProtKB/Swiss-Prot;Acc:Q8K4P7]
ENSMUSG00000038456	Dennd2a	0.321090452	0.047953626	0.842714983	up	no	5.684588557	4.530358498	1850	1885	1787	1755	1684	1722	5.579083931	5.831175354	5.643506385	4.288716262	4.489306671	4.813052561	DENN domain-containing protein 2A [Source:UniProtKB/Swiss-Prot;Acc:Q8C4S8]
ENSMUSG00000074228	Gm10645	0.320872827	0.233995684	1	up	no	12.174329	9.726648333	629	633	522	444	806	416	12.582948	12.995612	10.944427	7.199474	14.256211	7.72426	_
ENSMUSG00000032411	Tfdp2	0.320858454	0.134912184	1	up	no	0.655644828	0.504964228	484	413	358	366	468	298	0.744222184	0.652276879	0.570435422	0.455956505	0.636047142	0.422889038	transcription factor Dp 2 [Source:MGI Symbol;Acc:MGI:107167]
ENSMUSG00000010067	Rassf1	0.320478429	0.128640506	1	up	no	2.079854719	1.645636966	529	544	565	541	558	428	1.964772575	2.072745725	2.202045857	1.623787265	1.836223967	1.476899664	Ras association (RalGDS/AF-6) domain family member 1 [Source:MGI Symbol;Acc:MGI:1928386]
ENSMUSG00000021224	Numb	0.32038997	0.138739888	1	up	no	4.942848314	3.938582078	1145	711	761	850	866	730	6.365942817	4.038330027	4.424272099	3.814757922	4.254702323	3.746285989	NUMB, endocytic adaptor protein [Source:HGNC Symbol;Acc:HGNC:8060]
ENSMUSG00000044364	Tmem74b	0.319770378	0.444965389	1	up	no	1.135843726	0.890154764	87	163	53	85	125	67	0.95434276	1.847952221	0.605236197	0.763669056	1.222272811	0.684522426	transmembrane protein 74B [Source:MGI Symbol;Acc:MGI:1918629]
ENSMUSG00000086436	Gm13690	0.319007088	0.527451749	1	up	no	13.812703	11.05272033	206	157	167	246	51	205	15.769538	12.329396	13.339175	15.261231	3.398654	14.498276	predicted gene 13690 [Source:MGI Symbol;Acc:MGI:3652065]
ENSMUSG00000024052	Lpin2	0.319002242	0.054467873	0.874544762	up	no	3.903203174	3.109064077	2419	2020	1994	1795	2214	1971	4.306086787	3.687875813	3.715646922	2.588533618	3.484630139	3.254028473	Mus musculus lipin 2 (Lpin2), transcript variant 3, mRNA. [Source:RefSeq mRNA;Acc:NM_001357791]
ENSMUSG00000038295	Atg9b	0.31899388	0.246683121	1	up	no	1.071521039	0.839124923	218	174	179	187	161	177	1.198024161	0.986214464	1.030324493	0.830998588	0.783311383	0.903064799	Autophagy-related protein 9B [Source:UniProtKB/Swiss-Prot;Acc:Q6EBV9]
ENSMUSG00000046922	Gpr6	0.318955022	0.413910191	1	up	no	0.592148	0.454860667	44	52	47	40	65	24	0.535935	0.643716	0.596793	0.393874	0.699105	0.271603	G-protein coupled receptor 6 [Source:UniProtKB/Swiss-Prot;Acc:Q6YNI2]
ENSMUSG00000019774	Mtrf1l	0.318883302	0.215723651	1	up	no	1.704127121	1.346350986	271	239	239	255	221	221	1.810135714	1.633203329	1.66904232	1.376362448	1.298336445	1.364354066	Peptide chain release factor 1-like, mitochondrial [Source:UniProtKB/Swiss-Prot;Acc:Q8BJU9]
ENSMUSG00000023336	Wfdc1	0.31884714	0.193784469	1	up	no	5.4584248	4.356246245	360	357	412	404	316	342	5.09236453	5.168566429	6.114343441	4.639733725	3.945782867	4.483222142	WAP four-disulfide core domain 1 [Source:MGI Symbol;Acc:MGI:1915116]
ENSMUSG00000021010	Npas3	0.318793424	0.153612606	1	up	no	1.744704556	1.378973653	522	472	417	424	512	373	1.89383122	1.757564592	1.582717855	1.243998278	1.639629716	1.253292963	neuronal PAS domain protein 3 [Source:HGNC Symbol;Acc:HGNC:19311]
ENSMUSG00000020928	Higd1b	0.318767109	0.490616225	1	up	no	1.960637715	1.552126065	75	76	74	107	80	27	1.904201216	1.988079746	1.989632184	2.222723306	1.793701582	0.639953306	Mus musculus HIG1 domain family, member 1B (Higd1b), transcript variant 2, mRNA. [Source:RefSeq mRNA;Acc:NM_001357580]
ENSMUSG00000038665	Dgki	0.318637112	0.136214169	1	up	no	5.110469518	4.077895099	1460	1527	1301	965	1528	1478	5.099543997	5.475497457	4.756367101	2.724121487	4.718855434	4.790708376	diacylglycerol kinase iota isoform 2 [Source:RefSeq peptide;Acc:NP_001334033]
ENSMUSG00000027560	Dok5	0.318630643	0.144144672	1	up	no	9.011285	7.205707	803	662	677	614	631	752	9.907267	8.378518	8.74807	6.131995	6.879016	8.60611	Docking protein 5 [Source:UniProtKB/Swiss-Prot;Acc:Q91ZM9]
ENSMUSG00000007659	Bcl2l1	0.318557599	0.275966631	1	up	no	20.42461467	16.35809708	4541	4456	3607	5054	1919	4886	21.5902823	21.7321009	17.9514608	19.4643605	8.058598538	21.5513322	Mus musculus BCL2-like 1 (Bcl2l1), transcript variant 5, mRNA. [Source:RefSeq mRNA;Acc:NM_001355053]
ENSMUSG00000092470	Gm20518	0.317959633	0.418046538	1	up	no	1.132007667	0.888321	195	118	265	185	102	244	1.114012	0.692712	1.589299	0.85779	0.511762	1.295411	_
ENSMUSG00000067279	Ppp1r3c	0.31772059	0.057075082	0.890098192	up	no	15.54982567	12.456427	1880	2086	1711	1872	1764	1704	15.087366	17.182201	14.37991	12.170913	12.515633	12.682735	Protein phosphatase 1 regulatory subunit 3C [Source:UniProtKB/Swiss-Prot;Acc:Q7TMB3]
ENSMUSG00000078700	D030028A08Rik	0.317693065	0.278831915	1	up	no	1.085101571	0.850868437	305	319	293	163	352	318	1.057392644	1.131645682	1.066266385	0.452994045	1.079116432	1.020494833	RIKEN cDNA D030028A08 gene [Source:MGI Symbol;Acc:MGI:2441931]
ENSMUSG00000063696	Gm8730	0.317416314	0.453987428	1	up	no	2.178573	1.728568	57	91	130	110	83	71	1.288257	2.132884	3.114578	2.029609	1.658632	1.497463	predicted pseudogene 8730 [Source:MGI Symbol;Acc:MGI:3644565]
ENSMUSG00000021054	Sgpp1	0.317324481	0.054209039	0.873837599	up	no	7.581959335	6.065209184	2052	1723	1977	1818	1854	1726	7.927111907	6.825266385	7.993499714	5.68651153	6.328271413	6.180844609	sphingosine-1-phosphate phosphatase 1 [Source:MGI Symbol;Acc:MGI:2135760]
ENSMUSG00000038642	Ctss	0.317005729	0.032365753	0.710390987	up	no	47.41800116	38.04432469	2854	2852	2934	2821	2764	2559	45.85470467	47.01487702	49.3844218	36.72059679	39.26877107	38.14360621	cathepsin S [Source:MGI Symbol;Acc:MGI:107341]
ENSMUSG00000064293	Cntn4	0.316966265	0.189047032	1	up	no	1.211279049	0.952637334	573	365	458	360	481	440	1.459541307	0.951050622	1.223245217	0.744735353	1.077905803	1.035270845	Contactin-4 [Source:UniProtKB/Swiss-Prot;Acc:Q69Z26]
ENSMUSG00000015112	Slc25a13	0.316821173	0.407237041	1	up	no	0.857080783	0.668379766	191	153	98	138	209	59	1.090308226	0.898604698	0.582329424	0.633776372	1.05937124	0.311991685	solute carrier family 25 (mitochondrial carrier, adenine nucleotide translocator), member 13 [Source:MGI Symbol;Acc:MGI:1354721]
ENSMUSG00000026141	Col19a1	0.31655264	0.254384551	1	up	no	0.800906981	0.623416004	298	250	197	182	312	183	0.943685992	0.810219705	0.648815246	0.463864258	0.870398772	0.535984982	Collagen alpha-1(XIX) chain [Source:UniProtKB/Swiss-Prot;Acc:Q0VF58]
ENSMUSG00000020941	Map3k14	0.316498116	0.223121823	1	up	no	0.643948097	0.497402741	187	210	174	153	190	173	0.618515788	0.710684165	0.602644338	0.408315032	0.556732173	0.527161018	Mitogen-activated protein kinase kinase kinase 14 [Source:UniProtKB/Swiss-Prot;Acc:Q9WUL6]
ENSMUSG00000026809	Spaca9	0.316329174	0.681195717	1	up	no	0.912688042	0.713300636	30	48	16	23	63	0	0.849140585	1.417211379	0.471712163	0.527345403	1.612556506	0	Sperm acrosome-associated protein 9 [Source:UniProtKB/Swiss-Prot;Acc:Q7TPM5]
ENSMUSG00000032373	Car12	0.316216714	0.144587051	1	up	no	9.793570296	7.84625189	3838	3169	3006	3615	4036	1838	11.01309113	9.330986446	9.036633309	8.405066117	10.24503964	4.888649915	carbonic anhydrase 12 [Source:HGNC Symbol;Acc:HGNC:1371]
ENSMUSG00000031993	Snx19	0.316127175	0.092597211	1	up	no	8.757168057	7.014282768	2237	3340	2325	2422	2399	2591	7.254277983	11.1201	7.89712619	6.365889335	6.880184899	7.796774069	Sorting nexin-19 [Source:UniProtKB/Swiss-Prot;Acc:Q6P4T1]
ENSMUSG00000054520	Sh3bp2	0.316104262	0.226096238	1	up	no	1.17013386	0.920217172	208	240	232	215	217	198	1.045818889	1.237263925	1.227318765	0.875263042	0.957184997	0.928203478	SH3-domain binding protein 2 [Source:MGI Symbol;Acc:MGI:1346349]
ENSMUSG00000055172	C1ra	0.315687553	0.322495083	1	up	no	1.003157	0.786351333	163	119	121	128	156	89	1.190849	0.891094	0.927528	0.756841	1.003608	0.598605	Complement C1r-A subcomponent Complement C1r-A subcomponent heavy chain Complement C1r-A subcomponent light chain [Source:UniProtKB/Swiss-Prot;Acc:Q8CG16]
ENSMUSG00000020212	Mdm1	0.315577961	0.271513795	1	up	no	1.296428135	1.022070534	227	229	271	241	292	144	1.184284801	1.223074667	1.481924936	1.017637277	1.357165989	0.691408336	transformed mouse 3T3 cell double minute 1 [Source:MGI Symbol;Acc:MGI:96951]
ENSMUSG00000054855	Rnd1	0.315322217	0.171017625	1	up	no	3.327882284	2.654891214	482	418	430	371	467	401	3.539623257	3.140162824	3.303860771	2.204721015	3.030876315	2.729076312	Rho-related GTP-binding protein Rho6 [Source:UniProtKB/Swiss-Prot;Acc:Q8BLR7]
ENSMUSG00000021638	Ocln	0.315287957	0.124441306	1	up	no	4.786650211	3.827354648	913	1056	748	832	976	741	4.718639039	5.595576672	4.045734923	3.476879648	4.458938686	3.546245611	occludin [Source:MGI Symbol;Acc:MGI:106183]
ENSMUSG00000022807	Osbpl11	0.315033944	0.06708633	0.931750237	up	no	6.305211333	5.048714333	1310	1245	1271	1214	1254	1127	6.323391	6.167277	6.424966	4.74817	5.352355	5.045618	oxysterol binding protein like 11 [Source:HGNC Symbol;Acc:HGNC:16397]
ENSMUSG00000002908	Kcnn1	0.315027474	0.12633919	1	up	no	4.013530415	3.20660253	894	841	745	972	767	605	4.245697827	4.099129957	3.695763462	3.74052206	3.220139689	2.659145842	potassium calcium-activated channel subfamily N member 1 [Source:HGNC Symbol;Acc:HGNC:6290]
ENSMUSG00000044707	Ccnjl	0.314883306	0.186660335	1	up	no	3.638821264	2.905698287	490	474	399	457	364	455	3.836900495	3.809331956	3.270231341	2.893006338	2.519186889	3.304901635	Cyclin-J-like protein [Source:UniProtKB/Swiss-Prot;Acc:Q5SRT8]
ENSMUSG00000022443	Myh9	0.314589842	0.023659909	0.630041738	up	no	9.154620152	7.341450881	5342	5582	4969	4951	5456	4547	9.015505596	9.667060384	8.781294476	6.769380078	8.138593348	7.116379216	myosin, heavy polypeptide 9, non-muscle [Source:MGI Symbol;Acc:MGI:107717]
ENSMUSG00000070822	Zscan18	0.314418571	0.165366506	1	up	no	3.303852576	2.637293216	568	783	546	622	585	576	2.891054572	4.106400579	2.914102576	2.566768466	2.632845021	2.712266163	zinc finger and SCAN domain containing 18 [Source:MGI Symbol;Acc:MGI:3643810]
ENSMUSG00000025010	Ccnj	0.314188709	0.173208336	1	up	no	1.771814877	1.405506619	380	338	322	333	322	313	1.895398373	1.737672605	1.682373654	1.346003499	1.420825739	1.449690619	Cyclin-J [Source:UniProtKB/Swiss-Prot;Acc:Q3TZI6]
ENSMUSG00000040007	Bahd1	0.313853107	0.067544138	0.931750237	up	no	12.2510725	9.836317752	2786	2699	2198	2557	2094	2572	13.0308008	12.95544463	10.76697206	9.690340439	8.65923487	11.15937795	bromo adjacent homology domain containing 1 [Source:HGNC Symbol;Acc:HGNC:29153]
ENSMUSG00000025169	Ogfod3	0.313625914	0.254612654	1	up	no	5.195209333	4.160615333	319	332	263	244	379	233	5.319099	5.673961	4.592568	3.289684	5.587383	3.604779	2-oxoglutarate and iron-dependent oxygenase domain-containing protein 3 [Source:UniProtKB/Swiss-Prot;Acc:Q9D136]
ENSMUSG00000066735	Vkorc1l1	0.313604849	0.508175412	1	up	no	10.44567916	8.385356396	3111	1182	3089	2720	739	3462	12.89977085	5.022969528	13.4142971	9.135181612	2.705054307	13.31583327	vitamin K epoxide reductase complex, subunit 1-like 1 [Source:MGI Symbol;Acc:MGI:1916818]
ENSMUSG00000020193	Zpbp	0.312946696	0.34633266	1	up	no	0.321093667	0.238978667	56	89	40	58	59	45	0.285121	0.46543	0.21273	0.23924	0.264395	0.213301	zona pellucida binding protein [Source:MGI Symbol;Acc:MGI:1855701]
ENSMUSG00000097431	Gm26782	0.312918709	0.217951455	1	up	no	2.112583188	1.681154903	312	427	427	373	437	286	1.642222668	2.31973915	2.375787747	1.59917018	2.045135037	1.399159491	predicted gene, 26782 [Source:MGI Symbol;Acc:MGI:5477276]
ENSMUSG00000003382	Etv3	0.312792562	0.093739481	1	up	no	2.576470063	2.054777572	1103	1109	1341	1080	1109	1136	2.338797419	2.413705403	2.976907366	1.853230439	2.078079741	2.233022536	ETS translocation variant 3 [Source:UniProtKB/Swiss-Prot;Acc:Q8R4Z4]
ENSMUSG00000026466	Tor1aip1	0.31253677	0.060316962	0.902649713	up	no	7.528461496	6.042625182	1883	1860	1727	1803	1886	1478	7.593623115	7.6968399	7.294921472	5.885638375	6.722573502	5.519663671	torsin A interacting protein 1 [Source:MGI Symbol;Acc:MGI:3582693]
ENSMUSG00000029624	Ptcd1	0.312424819	0.071792929	0.945251443	up	no	9.096411906	7.305752146	1431	1298	1268	1329	1213	1226	9.547539851	8.884851268	8.8568446	7.179831614	7.153589754	7.583835071	Pentatricopeptide repeat-containing protein 1, mitochondrial [Source:UniProtKB/Swiss-Prot;Acc:Q8C2E4]
ENSMUSG00000030315	Vgll4	0.312354161	0.092644295	1	up	no	5.587905182	4.480621174	1404	1367	1286	1553	1296	999	5.664489749	5.663805117	5.435420681	5.07788634	4.626722658	3.737254522	vestigial like family member 4 [Source:MGI Symbol;Acc:MGI:2652840]
ENSMUSG00000022269	11-Mar	0.312166356	0.28222094	1	up	no	1.111387333	0.87568941	129	148	152	126	130	140	0.967085132	1.1594494	1.207627467	0.772898102	0.872129352	0.982040777	E3 ubiquitin-protein ligase MARCH11 [Source:UniProtKB/Swiss-Prot;Acc:Q8CBH7]
ENSMUSG00000026596	Abl2	0.312044401	0.031071086	0.69972847	up	no	10.05585323	8.080534704	4564	4765	5231	4420	4773	4528	9.221208053	9.877670138	11.0686815	7.232532901	8.52513337	8.483937842	v-abl Abelson murine leukemia viral oncogene 2 (arg, Abelson-related gene) [Source:MGI Symbol;Acc:MGI:87860]
ENSMUSG00000041688	Amot	0.312032626	0.076684825	0.958892195	up	no	3.66315408	2.931243471	1544	1243	1357	1261	1409	1216	4.003325648	3.305031603	3.681104988	2.644103039	3.226158555	2.92346882	Angiomotin [Source:UniProtKB/Swiss-Prot;Acc:Q8VHG2]
ENSMUSG00000017417	Plxdc1	0.311998327	0.223564918	1	up	no	1.984279895	1.578940032	504	411	379	316	396	482	2.266245724	1.899892371	1.786701589	1.147830933	1.574777309	2.014211854	Plexin domain-containing protein 1 [Source:UniProtKB/Swiss-Prot;Acc:Q91ZV7]
ENSMUSG00000039990	Edrf1	0.31191215	0.116449134	1	up	no	3.219007485	2.573703956	883	831	1002	976	751	834	3.063545398	2.951909343	3.641567714	2.741236121	2.298694065	2.681181681	erythroid differentiation regulatory factor 1 [Source:HGNC Symbol;Acc:HGNC:24640]
ENSMUSG00000048827	Pkd1l3	0.311884068	0.238051674	1	up	no	0.528428912	0.406255434	149	159	194	138	145	168	0.460169039	0.50174568	0.623372019	0.344349328	0.393565478	0.480851498	Polycystic kidney disease protein 1-like 3 [Source:UniProtKB/Swiss-Prot;Acc:Q2EG98]
ENSMUSG00000031786	Drc7	0.311737194	0.575737728	1	up	no	6.06553249	4.867390982	852	910	678	738	1496	90	6.212537785	6.811904783	5.172154901	4.359143534	9.645466417	0.597562994	Dynein regulatory complex subunit 7 [Source:UniProtKB/Swiss-Prot;Acc:Q6V3W6]
ENSMUSG00000035725	Prkx	0.31149189	0.123924988	1	up	no	2.669732403	2.131872647	696	698	690	711	727	524	2.608848217	2.689408682	2.710940312	2.162246505	2.411261929	1.822109507	cAMP-dependent protein kinase catalytic subunit PRKX [Source:UniProtKB/Swiss-Prot;Acc:Q922R0]
ENSMUSG00000097275	Gm26648	0.31132895	0.359689153	1	up	no	0.570977333	0.44074	207	159	85	91	188	124	0.773254	0.609321	0.330357	0.273071	0.621577	0.427572	predicted gene, 26648 [Source:MGI Symbol;Acc:MGI:5477142]
ENSMUSG00000062116	Zfp954	0.311111781	0.173877536	1	up	no	4.567173791	3.661837183	444	559	466	435	490	454	4.044441185	5.220874755	4.436205431	3.206365921	3.945460375	3.833685253	zinc finger protein 954 [Source:MGI Symbol;Acc:MGI:1917764]
ENSMUSG00000074994	Qser1	0.310816399	0.145371233	1	up	no	1.992727	1.587126	938	787	681	666	940	634	2.280569	1.963028	1.734584	1.310973	2.021011	1.429394	glutamine and serine rich 1 [Source:HGNC Symbol;Acc:HGNC:26154]
ENSMUSG00000097783	Gm26747	0.310801273	0.485138332	1	up	no	0.834181	0.653131	44	94	55	87	64	30	0.558985	1.219139	0.724419	0.895071	0.71116	0.353162	predicted gene, 26747 [Source:MGI Symbol;Acc:MGI:5477241]
ENSMUSG00000029177	Cenpa	0.310791864	0.300392046	1	up	no	0.305886629	0.227225448	64	95	89	71	98	49	0.223686303	0.355469835	0.338503747	0.201526706	0.317809325	0.162340313	Histone H3-like centromeric protein A [Source:UniProtKB/Swiss-Prot;Acc:O35216]
ENSMUSG00000097221	1810049J17Rik	0.310775976	0.140911151	1	up	no	36.12840333	29.107629	796	828	621	709	698	710	37.598881	40.10717	30.679159	27.123756	29.112738	31.086393	RIKEN cDNA 1810049J17 gene [Source:MGI Symbol;Acc:MGI:3704453]
ENSMUSG00000040187	Arntl2	0.310635612	0.264423535	1	up	no	0.530951446	0.408727604	141	126	145	125	111	138	0.531212619	0.484739624	0.576902096	0.383719996	0.365248393	0.477214422	Aryl hydrocarbon receptor nuclear translocator-like protein 2 [Source:UniProtKB/Swiss-Prot;Acc:Q2VPD4]
ENSMUSG00000034292	Traf3ip1	0.310442159	0.110142859	1	up	no	4.6213023	3.707232569	763	758	784	738	751	683	4.482109641	4.567888795	4.813908465	3.509149933	3.894383583	3.718164191	TRAF3 interacting protein 1 [Source:MGI Symbol;Acc:MGI:1921269]
ENSMUSG00000032089	Il10ra	0.310414248	0.350261466	1	up	no	1.513091	1.200813	228	196	286	315	142	214	1.422177	1.24902	1.868076	1.587864	0.779393	1.235182	Interleukin-10 receptor subunit alpha [Source:UniProtKB/Swiss-Prot;Acc:Q61727]
ENSMUSG00000020994	Pnn	0.310363751	0.044927904	0.815250851	up	no	9.04426882	7.27428955	2162	2486	2343	2226	2322	2057	8.183870835	9.658122651	9.290812973	6.824352368	7.774017843	7.22449844	pinin [Source:MGI Symbol;Acc:MGI:1100514]
ENSMUSG00000047409	Ctdspl	0.310222208	0.082059379	0.968371979	up	no	5.433632149	4.36297132	1290	1256	1242	1124	1348	1092	5.422199635	5.413505931	5.465190881	3.82512925	5.009960098	4.253824611	CTD small phosphatase-like protein [Source:UniProtKB/Swiss-Prot;Acc:P58465]
ENSMUSG00000021266	Wars	0.310035941	0.139158509	1	up	no	19.45768396	15.67565158	2555	4149	2305	3107	2771	2659	16.16201128	26.94436463	15.26667597	15.9242769	15.4969897	15.60568815	tryptophanyl-tRNA synthetase [Source:MGI Symbol;Acc:MGI:104630]
ENSMUSG00000032890	Rims3	0.30986491	0.17783624	1	up	no	1.297280995	1.027210744	558	447	391	393	521	378	1.522714088	1.252312128	1.116816768	0.869444009	1.258990212	0.953198009	regulating synaptic membrane exocytosis 3 [Source:MGI Symbol;Acc:MGI:2443331]
ENSMUSG00000015944	Gatsl2	0.309849702	0.027044581	0.669227522	up	no	20.25743041	16.3228643	7619	6650	6311	6687	6470	6283	21.99355201	19.69810527	19.08063393	15.63688138	16.50938594	16.82232558	GATS protein-like 2 [Source:MGI Symbol;Acc:MGI:1933384]
ENSMUSG00000035686	Thrsp	0.309763691	0.074431018	0.953291103	up	no	13.85904638	11.16179423	1305	1420	1348	1328	1361	1166	13.00133907	14.51573609	14.06006398	10.71856704	11.98446122	10.78235442	thyroid hormone responsive [Source:MGI Symbol;Acc:MGI:109126]
ENSMUSG00000001053	N4bp3	0.309648229	0.112210315	1	up	no	6.386800813	5.133800417	789	766	785	803	741	671	6.297616052	6.285196204	6.577590184	5.200008691	5.236609196	4.964783364	NEDD4-binding protein 3 [Source:UniProtKB/Swiss-Prot;Acc:Q8C7U1]
ENSMUSG00000031278	Acsl4	0.309611967	0.176223556	1	up	no	14.52607126	11.70117352	3886	3349	3315	4058	2047	3880	15.69075623	13.87372144	14.0137361	13.27104738	7.302760123	14.52971305	Long-chain-fatty-acid--CoA ligase 4 [Source:UniProtKB/Swiss-Prot;Acc:Q9QUJ7]
ENSMUSG00000035878	Hykk	0.309582157	0.253905613	1	up	no	0.469459007	0.359482474	230	217	123	205	165	143	0.556894062	0.540031924	0.311451034	0.40405598	0.353397263	0.320994179	Hydroxylysine kinase [Source:UniProtKB/Swiss-Prot;Acc:Q5U5V2]
ENSMUSG00000027962	Vcam1	0.309545824	0.109535897	1	up	no	4.772504481	3.831603102	1993	2093	1609	1810	2230	1335	4.899388594	5.277408208	4.140716641	3.603770934	4.847705226	3.043333146	vascular cell adhesion molecule 1 [Source:MGI Symbol;Acc:MGI:98926]
ENSMUSG00000115186	AC151836.1	0.309269271	0.490434175	1	up	no	0.308890167	0.229994985	48	26	17	11	48	19	0.485566696	0.269148801	0.171955003	0.083914712	0.429819652	0.17625059	_
ENSMUSG00000074346	Kcnd3os	0.309192605	0.468083662	1	up	no	0.774076125	0.605461	64	36	44	62	43	29	1.018478888	0.578565579	0.725183908	0.788773475	0.598827279	0.428782245	_
ENSMUSG00000039167	Adgrl4	0.30903009	0.097186224	1	up	no	4.939815318	3.968059491	1136	1033	882	996	1028	852	5.399601583	5.028869841	4.390974531	3.829959342	4.319933879	3.754285253	Adhesion G protein-coupled receptor L4 [Source:UniProtKB/Swiss-Prot;Acc:Q923X1]
ENSMUSG00000097652	Mhrt	0.308947134	0.426995237	1	up	no	1.1310189	0.893716191	73	45	68	45	78	48	1.301577806	0.812721558	1.278757334	0.652010442	1.229202148	0.799935984	myosin heavy chain associated RNA transcript [Source:MGI Symbol;Acc:MGI:3642848]
ENSMUSG00000038393	Txnip	0.308891412	0.099726413	1	up	no	8.896183903	7.162275905	1369	1310	1065	1123	1324	1081	9.538904008	9.378194053	7.771453648	6.336737483	8.163754049	6.986336184	thioredoxin interacting protein [Source:MGI Symbol;Acc:MGI:1889549]
ENSMUSG00000095440	Fignl2	0.30863692	0.408933553	1	up	no	0.299601606	0.222640033	50	55	75	60	80	20	0.242785151	0.271847472	0.384172194	0.234593149	0.342882869	0.090444082	fidgetin like 2 [Source:HGNC Symbol;Acc:HGNC:13287]
ENSMUSG00000021111	Papola	0.308366521	0.06620597	0.931122786	up	no	8.317145247	6.697312693	2872	2481	2049	2222	2427	2315	9.480080282	8.399931483	7.071423976	5.934505928	7.07652391	7.08090824	Poly(A) polymerase alpha [Source:UniProtKB/Swiss-Prot;Acc:Q61183]
ENSMUSG00000030759	Far1	0.308305893	0.097301638	1	up	no	3.040683961	2.436383476	979	1124	1193	996	1103	1002	2.643688812	3.108478047	3.369885025	2.174361057	2.632999303	2.501790067	Fatty acyl-CoA reductase 1 [Source:UniProtKB/Swiss-Prot;Acc:Q922J9]
ENSMUSG00000040167	Ikzf5	0.308279168	0.117241054	1	up	no	4.618553948	3.710725343	1243	1313	999	979	1251	1104	4.739255536	5.133951825	3.982454485	3.01860405	4.211929916	3.901642063	Zinc finger protein Pegasus [Source:UniProtKB/Swiss-Prot;Acc:Q8BU00]
ENSMUSG00000107379	Gm43126	0.308154967	0.333281873	1	up	no	10.74392567	8.658357	189	185	244	250	173	169	9.595632	9.648487	12.987658	10.299066	7.744323	7.931682	predicted gene 43126 [Source:MGI Symbol;Acc:MGI:5663263]
ENSMUSG00000034845	Plvap	0.308006304	0.251660011	1	up	no	5.034475333	4.047409667	514	439	392	480	528	270	5.645907	4.947852	4.509667	4.267703	5.127046	2.74748	plasmalemma vesicle associated protein [Source:HGNC Symbol;Acc:HGNC:13635]
ENSMUSG00000030201	Lrp6	0.307996525	0.08601586	0.984410445	up	no	5.117537057	4.114531941	3295	3361	2752	2733	3826	2310	5.255473617	5.50165199	4.595485563	3.530889672	5.397168505	3.415537645	LDL receptor related protein 6 [Source:HGNC Symbol;Acc:HGNC:6698]
ENSMUSG00000027386	Fbln7	0.307930363	0.418900499	1	up	no	0.71111101	0.555215286	94	114	103	129	120	40	0.631339	0.785026753	0.716967276	0.701606997	0.713749861	0.250289	Fibulin-7 [Source:UniProtKB/Swiss-Prot;Acc:Q501P1]
ENSMUSG00000073131	Vma21	0.307853509	0.284510449	1	up	no	7.267650999	5.851903825	2480	2408	2244	3046	1121	2609	7.403929942	7.380275587	7.018747469	7.368274997	2.956612936	7.230823542	VMA21 vacuolar H+-ATPase homolog (S. cerevisiae) [Source:MGI Symbol;Acc:MGI:1914298]
ENSMUSG00000028962	Slc4a2	0.307791825	0.302598171	1	up	no	8.492017068	6.841295918	3174	3298	3031	3292	4540	1252	8.310283906	8.856895848	8.308871449	6.980350014	10.51195982	3.031577924	solute carrier family 4 (anion exchanger), member 2 [Source:MGI Symbol;Acc:MGI:109351]
ENSMUSG00000047344	Lancl3	0.307745289	0.295362451	1	up	no	1.19982	0.950129	195	242	207	140	224	227	1.061096	1.357135	1.181229	0.619267	1.082774	1.148346	LanC-like protein 3 [Source:UniProtKB/Swiss-Prot;Acc:Q8CD19]
ENSMUSG00000035983	Gm7008	0.307723759	0.17496155	1	up	no	6.826870031	5.49632538	477	473	448	412	456	448	6.828913654	6.939777461	6.71191898	4.770129365	5.771280983	5.947565793	_
ENSMUSG00000031026	Trim66	0.307641022	0.251222049	1	up	no	0.794427533	0.622663274	326	368	386	205	408	370	0.700603179	0.812212625	0.870466795	0.355374686	0.774411413	0.738203722	tripartite motif-containing 66 [Source:MGI Symbol;Acc:MGI:2152406]
ENSMUSG00000025475	Adgra1	0.307637196	0.046934128	0.833208589	up	no	15.95063713	12.86833595	4654	3334	3570	3970	3767	3216	18.85279974	13.85719644	15.1419152	13.03124045	13.48919429	12.08457311	Adhesion G protein-coupled receptor A1 [Source:UniProtKB/Swiss-Prot;Acc:Q8C4G9]
ENSMUSG00000085401	Slc39a1-ps	0.307520956	0.496646168	1	up	no	0.956199667	0.75344	43	31	51	28	41	46	0.961523	0.708022	1.199054	0.503357	0.810221	0.946742	solute carrier family 39 (zinc transporter), member 1, pseudogene [Source:MGI Symbol;Acc:MGI:3615375]
ENSMUSG00000035305	Ror1	0.307496336	0.238952807	1	up	no	1.057661	0.835439667	250	291	277	194	281	278	0.945148	1.130103	1.097732	0.592591	0.939656	0.974072	Inactive tyrosine-protein kinase transmembrane receptor ROR1 [Source:UniProtKB/Swiss-Prot;Acc:Q9Z139]
ENSMUSG00000041846	Ppp4r3a	0.307402382	0.090367604	1	up	no	2.425580147	1.940909829	1511	1379	1406	1306	1655	1078	2.500733266	2.340094471	2.435912703	1.7484716	2.421980805	1.65227708	Serine/threonine-protein phosphatase 4 regulatory subunit 3A [Source:UniProtKB/Swiss-Prot;Acc:Q6P2K6]
ENSMUSG00000027314	Dll4	0.307344365	0.336870559	1	up	no	0.892878838	0.70237314	195	149	122	203	106	124	1.097956978	0.860626174	0.720053364	0.930020575	0.527125664	0.64997318	Delta-like protein 4 [Source:UniProtKB/Swiss-Prot;Acc:Q9JI71]
ENSMUSG00000009621	Vav2	0.307175013	0.122957258	1	up	no	2.416630416	1.933998125	795	834	629	729	699	688	2.495946869	2.687380477	2.066563902	1.855190437	1.942117038	2.004686901	vav 2 oncogene [Source:MGI Symbol;Acc:MGI:102718]
ENSMUSG00000027895	Kcnc4	0.307139925	0.037696018	0.752324676	up	no	20.47390267	16.528702	3757	3299	3035	3635	2985	2963	22.359461	20.148497	18.91375	17.526464	15.704465	16.355177	Potassium voltage-gated channel subfamily C member 4 [Source:UniProtKB/Swiss-Prot;Acc:Q8R1C0]
ENSMUSG00000115798	AC140267.1	0.306943746	0.4779767	1	up	no	5.309503	4.272784667	59	54	41	49	55	42	5.992396	5.638373	4.29774	3.994726	4.920914	3.902714	_
ENSMUSG00000036591	Arhgap21	0.306720704	0.046175186	0.826941771	up	no	18.76440499	15.15144452	8536	7841	7018	7415	6675	7997	20.080268	18.92808035	17.28486663	14.12738367	13.87975375	17.44719615	Rho GTPase activating protein 21 [Source:MGI Symbol;Acc:MGI:1918685]
ENSMUSG00000060681	Slc9a6	0.306588452	0.270043098	1	up	no	23.26702104	18.79343958	5747	4676	5504	6561	2589	6003	24.59786803	20.53351031	24.66968478	22.75119194	9.796217108	23.83290968	Mus musculus solute carrier family 9 (sodium/hydrogen exchanger), member 6 (Slc9a6), transcript variant 2, mRNA. [Source:RefSeq mRNA;Acc:NM_001358861]
ENSMUSG00000049791	Fzd4	0.306492073	0.190035012	1	up	no	4.392776333	3.532883667	1356	1453	1157	1019	1797	916	4.402831	4.840314	3.935184	2.679406	5.159666	2.759579	Frizzled-4 [Source:UniProtKB/Swiss-Prot;Acc:Q61088]
ENSMUSG00000113298	Gm48559	0.306422956	0.467848406	1	up	no	4.809757333	3.870247	59	83	64	54	96	44	4.053234	5.81337	4.562668	3.001931	5.841731	2.767079	predicted gene, 48559 [Source:MGI Symbol;Acc:MGI:6098115]
ENSMUSG00000022228	Zscan26	0.306369252	0.081242183	0.968184837	up	no	11.1697974	9.013596032	2209	2052	2283	2308	1712	2187	11.04063976	10.51788621	11.95086623	9.343640409	7.561651844	10.13549584	zinc finger and SCAN domain containing 26 [Source:MGI Symbol;Acc:MGI:3531417]
ENSMUSG00000115007	AC154276.1	0.306257316	0.445977499	1	up	no	1.072602333	0.848327	80	73	36	63	59	53	1.336832	1.25355	0.627425	0.856589	0.866726	0.821666	_
ENSMUSG00000034226	Rhov	0.306193936	0.313880648	1	up	no	3.319343	2.665471	269	172	318	285	217	218	3.442397	2.257253	4.258379	2.958489	2.457876	2.580048	Rho-related GTP-binding protein RhoV [Source:UniProtKB/Swiss-Prot;Acc:Q8VDU1]
ENSMUSG00000058488	Kl	0.306079196	0.510406758	1	up	no	15.08340739	12.18090087	7600	6159	5176	5885	11060	1158	17.77990054	14.78601422	12.68430743	11.15234647	22.87838723	2.511968916	Klotho Klotho peptide [Source:UniProtKB/Swiss-Prot;Acc:O35082]
ENSMUSG00000042249	Grk3	0.30606162	0.0304163	0.697983205	up	no	11.41635065	9.214963382	4940	4219	4182	4312	4564	3764	12.3966939	10.86495153	10.98740654	8.76196687	10.12398287	8.758940406	Beta-adrenergic receptor kinase 2 [Source:UniProtKB/Swiss-Prot;Acc:Q3UYH7]
ENSMUSG00000017667	Zfp334	0.306046842	0.08057182	0.967301885	up	no	3.063357333	2.458697667	1127	1163	1085	1089	1072	1018	2.996011	3.173698	3.020363	2.344849	2.520699	2.510545	zinc finger protein 334 [Source:MGI Symbol;Acc:MGI:2388656]
ENSMUSG00000020261	Slc36a1	0.305958696	0.141117191	1	up	no	3.950475392	3.1764478	1193	761	1037	930	928	956	4.622529948	3.02583575	4.203060477	2.917939984	3.178791661	3.432611754	Proton-coupled amino acid transporter 1 [Source:UniProtKB/Swiss-Prot;Acc:Q8K4D3]
ENSMUSG00000039096	Rsad1	0.30587559	0.171766135	1	up	no	1.99332623	1.593398567	381	393	405	391	374	343	1.879391221	2.000092359	2.100495109	1.568627938	1.634986844	1.576580918	Radical S-adenosyl methionine domain-containing protein 1, mitochondrial [Source:UniProtKB/Swiss-Prot;Acc:Q5SUV1]
ENSMUSG00000039512	Uhrf1bp1	0.305812055	0.085483954	0.982427169	up	no	2.55307357	2.046301315	977	1029	978	936	997	875	2.446806536	2.645446259	2.566967916	1.899699923	2.206389228	2.032814794	UHRF1 (ICBP90) binding protein 1 [Source:MGI Symbol;Acc:MGI:3041238]
ENSMUSG00000046785	Epm2aip1	0.305799947	0.171092056	1	up	no	20.75399654	16.77074808	6590	6560	6798	3910	8041	6730	20.07051151	20.50269522	21.68878287	9.646385174	21.65459186	19.0112672	EPM2A-interacting protein 1 [Source:UniProtKB/Swiss-Prot;Acc:Q8VEH5]
ENSMUSG00000027490	E2f1	0.305613447	0.260835031	1	up	no	2.301384806	1.842955902	400	320	260	250	308	351	2.763996617	2.26248066	1.877677142	1.399661193	1.879302997	2.249903516	Transcription factor E2F1 [Source:UniProtKB/Swiss-Prot;Acc:Q61501]
ENSMUSG00000044320	1700001O22Rik	0.305585116	0.335746068	1	up	no	1.201441645	0.953014651	123	162	170	193	129	107	0.941236924	1.278996864	1.384091146	1.211678892	0.883707713	0.763657348	RIKEN cDNA 1700001O22 gene [Source:MGI Symbol;Acc:MGI:1923631]
ENSMUSG00000029249	Rest	0.305578952	0.208831178	1	up	no	0.954705138	0.753380335	292	371	265	283	339	238	0.879746818	1.148531864	0.835836734	0.69250862	0.903713324	0.663919063	RE1-silencing transcription factor [Source:UniProtKB/Swiss-Prot;Acc:Q8VIG1]
ENSMUSG00000060924	Csmd1	0.305363523	0.045693157	0.823310817	up	no	3.338915618	2.682902171	3208	2846	2496	2636	2829	2575	3.675979394	3.345800901	2.994966558	2.446463283	2.864364582	2.737878647	CUB and sushi domain-containing protein 1 [Source:UniProtKB/Swiss-Prot;Acc:Q923L3]
ENSMUSG00000020057	Dram1	0.3052596	0.349402339	1	up	no	0.360533127	0.272707884	66	44	41	36	48	47	0.466051418	0.320585211	0.294962752	0.205741577	0.300461464	0.31192061	DNA damage-regulated autophagy modulator protein 1 [Source:UniProtKB/Swiss-Prot;Acc:Q9DC58]
ENSMUSG00000036833	Pnpla7	0.304579283	0.157794882	1	up	no	1.72732245	1.379543334	574	544	632	479	622	538	1.656911425	1.613584804	1.911471122	1.112488767	1.589215787	1.436925449	Patatin-like phospholipase domain-containing protein 7 [Source:UniProtKB/Swiss-Prot;Acc:A2AJ88]
ENSMUSG00000084790	Gm15879	0.304406698	0.39624577	1	up	no	1.744956299	1.393999791	83	86	74	87	62	79	1.757165009	1.852421159	1.625282728	1.490967632	1.14575413	1.54527761	predicted gene 15879 [Source:MGI Symbol;Acc:MGI:3802012]
ENSMUSG00000029246	Ppat	0.304317674	0.13621515	1	up	no	3.572926398	2.874428114	740	616	766	702	720	586	3.645258978	3.1141028	3.959417415	2.803824144	3.138631746	2.680828452	phosphoribosyl pyrophosphate amidotransferase [Source:MGI Symbol;Acc:MGI:2387203]
ENSMUSG00000051401	Kctd16	0.304272588	0.235622933	1	up	no	5.622490333	4.534361333	311	375	332	275	347	337	5.0253	6.220497	5.621674	3.596267	4.954588	5.052229	BTB/POZ domain-containing protein KCTD16 [Source:UniProtKB/Swiss-Prot;Acc:Q5DTY9]
ENSMUSG00000042978	Sbk1	0.304266809	0.037087899	0.749314686	up	no	33.13230157	26.81330195	6154	6623	6018	6066	5565	6195	31.76988539	35.08815275	32.53886659	25.3685721	25.40221031	29.66912345	Serine/threonine-protein kinase SBK1 [Source:UniProtKB/Swiss-Prot;Acc:Q8QZX0]
ENSMUSG00000103001	A930005N03Rik	0.304258224	0.44136192	1	up	no	1.289933333	1.025649333	76	88	53	72	84	48	1.328398	1.576662	0.96474	1.017081	1.286629	0.773238	RIKEN cDNA A930005N03 gene [Source:MGI Symbol;Acc:MGI:1924441]
ENSMUSG00000074876	Spata5l1	0.303982258	0.322640855	1	up	no	2.06230551	1.651496513	151	154	126	132	142	132	2.121075732	2.216177874	1.849662923	1.497815968	1.749435272	1.707238299	_
ENSMUSG00000023046	Igfbp6	0.303934363	0.266132096	1	up	no	8.003455	6.464125333	452	322	423	297	387	439	8.858325	6.474252	8.677788	4.718259	6.699464	7.974653	Insulin-like growth factor-binding protein 6 [Source:UniProtKB/Swiss-Prot;Acc:P47880]
ENSMUSG00000030877	Mfsd13b	0.30389094	0.440814741	1	up	no	0.593613267	0.461871628	75	45	40	63	34	49	0.817556302	0.502487317	0.460796181	0.553416777	0.330390549	0.501807558	_
ENSMUSG00000040836	Gpr161	0.303871755	0.059086775	0.896589551	up	no	13.63101047	11.0231549	3517	4540	4649	4061	3955	4057	11.0261636	14.60482867	15.26203914	10.31243281	10.96068617	11.79634573	G protein-coupled receptor 161 [Source:MGI Symbol;Acc:MGI:2685054]
ENSMUSG00000022895	Ets2	0.303846802	0.034314178	0.725315382	up	no	16.20648863	13.10971508	3360	3527	3362	3477	3005	3257	15.55873324	16.75864987	16.30208278	13.04202613	12.2994605	13.9876586	Protein C-ets-2 [Source:UniProtKB/Swiss-Prot;Acc:P15037]
ENSMUSG00000020190	Mknk2	0.303744556	0.049670569	0.85388319	up	no	12.49011615	10.09984364	2096	2190	2238	2225	2053	1929	11.74516156	12.59160926	13.13357761	10.10200785	10.17097174	10.02655133	MAP kinase-interacting serine/threonine-protein kinase 2 [Source:UniProtKB/Swiss-Prot;Acc:Q8CDB0]
ENSMUSG00000097577	6230400D17Rik	0.303538396	0.382070632	1	up	no	0.742645752	0.582764408	78	111	61	83	75	72	0.68486456	0.990801172	0.552271523	0.586728716	0.580296992	0.581267515	RIKEN cDNA 6230400D17 gene [Source:MGI Symbol;Acc:MGI:1923383]
ENSMUSG00000031681	Smad1	0.303429814	0.115439318	1	up	no	2.692680313	2.162974957	796	730	743	772	705	668	2.768599651	2.603338757	2.706102531	2.173708982	2.166298037	2.148917851	SMAD family member 1 [Source:MGI Symbol;Acc:MGI:109452]
ENSMUSG00000001435	Col18a1	0.303396032	0.272323796	1	up	no	1.541517527	1.230191652	520	498	438	431	670	267	1.613009025	1.586939182	1.424604374	1.083120201	1.839964111	0.767490645	Collagen alpha-1(XVIII) chain Endostatin Non-collagenous domain 1 [Source:UniProtKB/Swiss-Prot;Acc:P39061]
ENSMUSG00000036528	Ppfibp2	0.303249614	0.340526249	1	up	no	0.683594934	0.535044837	313	352	308	261	501	135	0.644155238	0.741961889	0.664667676	0.435681744	0.911941846	0.257510922	PTPRF interacting protein, binding protein 2 (liprin beta 2) [Source:MGI Symbol;Acc:MGI:894649]
ENSMUSG00000104309	Gm5846	0.303154245	0.408256638	1	up	no	1.832471667	1.466226667	82	157	109	129	97	103	1.259941	2.477638	1.759836	1.603772	1.320449	1.474459	predicted gene 5846 [Source:MGI Symbol;Acc:MGI:3643624]
ENSMUSG00000064329	Scn1a	0.303100671	0.038263	0.756526539	up	no	7.174372003	5.795940781	3763	3490	3489	3637	3021	3523	7.364106871	7.007537315	7.151471821	5.765911215	5.226918878	6.394992249	Sodium channel protein type 1 subunit alpha [Source:UniProtKB/Swiss-Prot;Acc:A2APX8]
ENSMUSG00000006471	Ndor1	0.302995964	0.279173758	1	up	no	2.157945943	1.730217344	840	446	426	657	558	404	3.131000613	1.691598388	1.651238827	1.97633751	1.828804535	1.385509987	NADPH-dependent diflavin oxidoreductase 1 [Source:UniProtKB/Swiss-Prot;Acc:A2AI05]
ENSMUSG00000061288	Taok3	0.302957744	0.114071833	1	up	no	4.762467391	3.841461907	3092	2164	1911	2101	2206	2423	6.038067938	4.338155112	3.911179123	3.327112338	3.803838987	4.393434395	TAO kinase 3 [Source:MGI Symbol;Acc:MGI:3041177]
ENSMUSG00000054958	Nt5c1a	0.302771377	0.295911569	1	up	no	4.469396	3.60438	279	202	253	189	271	230	4.980458	3.701388	4.726342	2.729986	4.27124	3.811914	5'-nucleotidase, cytosolic IA [Source:MGI Symbol;Acc:MGI:2155700]
ENSMUSG00000026918	Brd3	0.302711886	0.05430531	0.873837599	up	no	7.518501267	6.076524754	2748	2322	2345	2270	2373	2373	8.173854305	7.084773975	7.296875522	5.462711847	6.232846825	6.534015589	Bromodomain-containing protein 3 [Source:UniProtKB/Swiss-Prot;Acc:Q8K2F0]
ENSMUSG00000036834	Plch1	0.302708169	0.321861065	1	up	no	0.848037035	0.668601211	454	279	261	201	470	238	1.144128716	0.716136558	0.683845831	0.408914169	1.04643657	0.550452895	1-phosphatidylinositol 4,5-bisphosphate phosphodiesterase eta-1 [Source:UniProtKB/Swiss-Prot;Acc:Q4KWH5]
ENSMUSG00000113255	Tes3-ps	0.302592529	0.405892557	1	up	no	0.650905	0.508829333	105	123	60	118	83	67	0.695142	0.839177	0.418396	0.633885	0.484021	0.408582	testis derived transcript 3, pseudogene [Source:MGI Symbol;Acc:MGI:3582925]
ENSMUSG00000031875	Cmtm3	0.302572986	0.216879316	1	up	no	2.543857826	2.043653329	362	381	286	316	357	297	2.618009491	2.84356521	2.169998777	1.844294103	2.289589144	1.997076738	CKLF-like MARVEL transmembrane domain-containing protein 3 [Source:UniProtKB/Swiss-Prot;Acc:Q99LJ5]
ENSMUSG00000030016	Zfp638	0.302533781	0.094224756	1	up	no	3.219726764	2.591724435	2205	2799	1856	1985	2316	2156	3.035676015	3.953157882	2.670346395	2.213283032	2.8148843	2.747005973	zinc finger protein 638 [Source:MGI Symbol;Acc:MGI:1203484]
ENSMUSG00000014444	Piezo1	0.302336606	0.19233246	1	up	no	1.143968025	0.908780852	555	508	473	449	636	348	1.212588105	1.137536426	1.081779543	0.793632378	1.229152811	0.703557366	Mus musculus piezo-type mechanosensitive ion channel component 1 (Piezo1), transcript variant 1, mRNA. [Source:RefSeq mRNA;Acc:NM_001357349]
ENSMUSG00000038521	C1s1	0.302315538	0.355403571	1	up	no	0.363405893	0.275798902	52	55	48	46	59	33	0.36007093	0.383366243	0.346780507	0.25515339	0.362020938	0.21022238	complement component 1, s subcomponent 1 [Source:MGI Symbol;Acc:MGI:1355312]
ENSMUSG00000027577	Chrna4	0.302307694	0.118827404	1	up	no	4.491944204	3.623856341	1126	862	1044	963	1092	818	4.891609358	3.8394316	4.744791654	3.386259454	4.191008498	3.294301071	cholinergic receptor, nicotinic, alpha polypeptide 4 [Source:MGI Symbol;Acc:MGI:87888]
ENSMUSG00000042772	Smg7	0.30218716	0.027796592	0.67410873	up	no	13.4548077	10.89324637	4091	3593	3776	3740	3627	3519	14.07563569	12.68364554	13.60514186	10.42085428	11.03122637	11.22765846	Protein SMG7 [Source:UniProtKB/Swiss-Prot;Acc:Q5RJH6]
ENSMUSG00000025278	Flnb	0.302084812	0.076134344	0.956639484	up	no	5.071355389	4.094380205	2075	2147	2041	1715	2323	1871	4.920242744	5.224905614	5.068917809	3.294989498	4.871584747	4.11656637	Filamin-B [Source:UniProtKB/Swiss-Prot;Acc:Q80X90]
ENSMUSG00000041343	Ankrd42	0.302032164	0.255930306	1	up	no	1.671530658	1.336904588	389	412	350	475	386	237	1.657325214	1.803674666	1.553592093	1.637046592	1.447099669	0.926567502	Ankyrin repeat domain-containing protein 42 [Source:UniProtKB/Swiss-Prot;Acc:Q3V096]
ENSMUSG00000041297	Cdk13	0.301976044	0.039696951	0.77466908	up	no	4.030653552	3.250540902	2564	2351	2375	2438	2379	2093	4.154469333	3.907698969	4.029792354	3.200472445	3.407369134	3.143781125	Cyclin-dependent kinase 13 [Source:UniProtKB/Swiss-Prot;Acc:Q69ZA1]
ENSMUSG00000031654	Cbln1	0.301915742	0.387210523	1	up	no	2.944844298	2.369900141	646	283	281	299	557	275	4.640776424	2.082160948	2.111595522	1.739780968	3.537132757	1.832786697	Cerebellin-1 Cerebellin [des-Ser1]-cerebellin [Source:UniProtKB/Swiss-Prot;Acc:Q9R171]
ENSMUSG00000047141	Zfp654	0.301821245	0.100658727	1	up	no	3.111099153	2.504932461	862	857	897	819	886	768	3.002343453	3.061437173	3.269516832	2.308974677	2.72600052	2.479822187	zinc finger protein 654 [Source:MGI Symbol;Acc:MGI:1919270]
ENSMUSG00000018581	Dnah11	0.301534832	0.452508141	1	up	no	0.195505398	0.139769749	106	174	101	65	239	18	0.15943757	0.268871752	0.158206872	0.077827256	0.317129003	0.024352989	dynein axonemal heavy chain 11 [Source:HGNC Symbol;Acc:HGNC:2942]
ENSMUSG00000067081	Asb18	0.30148588	0.381315664	1	up	no	0.816509734	0.643670901	125	207	103	92	175	132	0.685993613	1.171474962	0.592060627	0.409294799	0.84992535	0.671792555	Ankyrin repeat and SOCS box protein 18 [Source:UniProtKB/Swiss-Prot;Acc:Q8VHA6]
ENSMUSG00000053552	Ebf4	0.301482479	0.213076939	1	up	no	2.21175605	1.775800873	376	310	282	302	322	284	2.520540355	2.128025132	1.986702664	1.6446934	1.91487758	1.76783164	early B cell factor 4 [Source:MGI Symbol;Acc:MGI:2385972]
ENSMUSG00000037225	Fgf2	0.30135663	0.240420417	1	up	no	1.079871533	0.857452722	376	322	290	234	384	297	1.205061757	1.061997378	0.972555465	0.603218127	1.088700649	0.880439389	Fibroblast growth factor 2 [Source:UniProtKB/Swiss-Prot;Acc:P15655]
ENSMUSG00000033545	Znrf1	0.30135453	0.128801695	1	up	no	4.571726547	3.691060028	1467	1578	1274	1336	1154	1582	4.556351835	5.023839515	4.13498829	3.358332229	3.163430517	4.551417337	zinc and ring finger 1 [Source:MGI Symbol;Acc:MGI:2177308]
ENSMUSG00000019990	Pde7b	0.301291483	0.143682437	1	up	no	1.261407832	1.004817312	871	604	646	648	634	692	1.521810706	1.081230096	1.181182695	0.916024973	0.979042653	1.119384311	cAMP-specific 3',5'-cyclic phosphodiesterase 7B [Source:UniProtKB/Swiss-Prot;Acc:Q9QXQ1]
ENSMUSG00000032413	Rasa2	0.301092441	0.084571907	0.979786452	up	no	1.278465382	1.018814298	882	950	895	866	904	782	1.210486183	1.336338698	1.288571266	0.963609345	1.096770252	0.996063297	Ras GTPase-activating protein 2 [Source:UniProtKB/Swiss-Prot;Acc:P58069]
ENSMUSG00000050931	Sgms2	0.300987536	0.478054035	1	up	no	2.021747395	1.622215132	719	533	447	380	1047	170	2.514221407	1.914797599	1.636223179	1.07623502	3.240724871	0.549685507	Phosphatidylcholine:ceramide cholinephosphotransferase 2 [Source:UniProtKB/Swiss-Prot;Acc:Q9D4B1]
ENSMUSG00000086330	1700007J10Rik	0.300805605	0.402882077	1	up	no	1.08159074	0.859214133	67	68	56	57	72	48	1.117651449	1.156491085	0.970629686	0.770352678	1.061012703	0.746277017	RIKEN cDNA 1700007J10 gene [Source:MGI Symbol;Acc:MGI:1916570]
ENSMUSG00000020919	Stat5b	0.300702476	0.140406425	1	up	no	3.990512037	3.220910794	966	946	1054	957	1160	704	3.798231137	3.824907151	4.348397824	3.054620445	4.038170079	2.56994186	Signal transducer and activator of transcription 5B [Source:UniProtKB/Swiss-Prot;Acc:P42232]
ENSMUSG00000001827	Folr1	0.300466726	0.635672957	1	up	no	6.455818192	5.223256632	659	742	609	881	1028	40	6.187297686	7.192956012	5.987200879	6.739343614	8.58644913	0.343977153	Folate receptor alpha [Source:UniProtKB/Swiss-Prot;Acc:P35846]
ENSMUSG00000050890	Pdik1l	0.300155811	0.154709521	1	up	no	2.073513036	1.665250515	569	523	529	591	481	462	2.13419803	2.011470543	2.074870534	1.796275468	1.59339321	1.606082867	Serine/threonine-protein kinase PDIK1L [Source:UniProtKB/Swiss-Prot;Acc:Q8QZR7]
ENSMUSG00000039929	Urb1	0.300152139	0.164480385	1	up	no	1.394135109	1.113486848	570	552	418	522	469	452	1.515960356	1.507371057	1.159073914	1.125470432	1.100976059	1.114014054	URB1 ribosome biogenesis 1 homolog (S. cerevisiae) [Source:MGI Symbol;Acc:MGI:2146468]
ENSMUSG00000040195	Nemp1	0.300045333	0.34459729	1	up	no	0.548640707	0.426843414	228	143	210	225	102	205	0.630661659	0.405217184	0.610043278	0.503444712	0.249737095	0.527348433	Nuclear envelope integral membrane protein 1 [Source:UniProtKB/Swiss-Prot;Acc:Q6ZQE4]
ENSMUSG00000032415	Ube2cbp	0.299755298	0.462864789	1	up	no	0.664116	0.520760333	74	44	44	66	32	51	0.891639	0.547688	0.553021	0.646121	0.342088	0.574072	ubiquitin-conjugating enzyme E2C binding protein [Source:MGI Symbol;Acc:MGI:1917598]
ENSMUSG00000029461	Fam168a	0.299721392	0.067889319	0.932877094	up	no	30.515087	24.7719805	12251	9087	8451	8605	10074	9515	36.86119622	28.05572088	26.62834389	20.96871207	26.79280647	26.55442296	Protein FAM168A [Source:UniProtKB/Swiss-Prot;Acc:Q8BGZ2]
ENSMUSG00000060568	Fam78b	0.299679495	0.161892351	1	up	no	3.45715807	2.789952119	1276	890	787	1047	838	908	4.393287807	3.142351371	2.835835033	2.920967384	2.551487161	2.897401812	Protein FAM78B [Source:UniProtKB/Swiss-Prot;Acc:Q8BQN5]
ENSMUSG00000032393	Dpp8	0.299634827	0.045580778	0.822624513	up	no	12.71622297	10.31264312	8781	7152	7495	6797	8115	7287	13.9767192	11.67729305	12.49465665	8.764425685	11.41788523	10.75561843	Dipeptidyl peptidase 8 [Source:UniProtKB/Swiss-Prot;Acc:Q80YA7]
ENSMUSG00000069135	Fgfr1op	0.299459134	0.372919609	1	up	no	2.377876344	1.913415686	274	495	508	498	523	207	1.481119424	2.758581814	2.893927794	2.191153312	2.509074829	1.040018917	FGFR1 onco partner [Source:UniProtKB/Swiss-Prot;Acc:Q66JX5]
ENSMUSG00000105993	Tex13c2	0.299289438	0.545513273	1	up	no	0.660821667	0.518283667	26	38	98	38	46	65	0.308797	0.463069	1.210599	0.359871	0.483566	0.711414	_
ENSMUSG00000025340	Rabgef1	0.299283453	0.250395399	1	up	no	6.326460349	5.122501047	1166	922	1457	788	1138	1400	6.086317609	4.929450589	7.963612847	3.329249636	5.251015108	6.787238397	Rab5 GDP/GTP exchange factor [Source:UniProtKB/Swiss-Prot;Acc:Q9JM13]
ENSMUSG00000063506	Arhgap22	0.299186552	0.322747249	1	up	no	0.966130411	0.766455385	216	171	124	151	160	163	1.198802786	0.97629606	0.723292386	0.68181372	0.777052959	0.840499474	Rho GTPase activating protein 22 [Source:MGI Symbol;Acc:MGI:2443418]
ENSMUSG00000073542	Cep76	0.299182342	0.213829253	1	up	no	1.951951	1.567647	328	403	312	330	321	332	1.797493	2.268112	1.790248	1.463754	1.553263	1.685924	Centrosomal protein of 76 kDa [Source:UniProtKB/Swiss-Prot;Acc:Q0VEJ0]
ENSMUSG00000027845	Dclre1b	0.298905496	0.245187099	1	up	no	0.816529589	0.645018351	228	339	355	277	342	243	0.588839819	0.899723653	0.961025294	0.575765227	0.779029086	0.580260738	5' exonuclease Apollo [Source:UniProtKB/Swiss-Prot;Acc:Q8C7W7]
ENSMUSG00000087528	9830144P21Rik	0.298877686	0.289599742	1	up	no	0.862285494	0.682226979	231	173	164	182	154	191	1.030672022	0.791573926	0.764610535	0.655517107	0.604193829	0.786970001	RIKEN cDNA 9830144P21 gene [Source:MGI Symbol;Acc:MGI:3041171]
ENSMUSG00000046269	Usp27x	0.298843237	0.377487125	1	up	no	3.402833413	2.747467038	422	834	693	329	753	742	2.147422968	4.358976426	3.702100846	1.351832335	3.386386846	3.504181933	ubiquitin specific peptidase 27, X chromosome [Source:MGI Symbol;Acc:MGI:1859645]
ENSMUSG00000020044	Timp3	0.298483038	0.111782855	1	up	no	17.07455034	13.86474557	7002	6235	5457	5591	7861	4359	18.76481517	17.14278242	15.31605342	12.13463251	18.624447	10.83515721	tissue inhibitor of metalloproteinase 3 [Source:MGI Symbol;Acc:MGI:98754]
ENSMUSG00000026547	Tagln2	0.29843416	0.184103408	1	up	no	6.385094629	5.173253915	685	535	571	580	666	458	7.170291847	5.743401498	6.241590541	4.911882999	6.16228709	4.445591658	Transgelin-2 [Source:UniProtKB/Swiss-Prot;Acc:Q9WVA4]
ENSMUSG00000032192	Gnb5	0.298187106	0.078034659	0.959452284	up	no	33.63626615	27.33681855	4539	4655	4862	5773	3742	4020	31.7882205	33.4566562	35.66392176	32.74831151	23.15920654	26.10293761	guanine nucleotide binding protein (G protein), beta 5 [Source:MGI Symbol;Acc:MGI:101848]
ENSMUSG00000053877	Srcap	0.2976853	0.134972231	1	up	no	6.602667805	5.352999917	5144	4880	3998	3337	4377	5447	7.105528547	6.918217854	5.784257013	3.732190762	5.346643641	6.980165347	Snf2-related CREBBP activator protein [Source:MGI Symbol;Acc:MGI:2444036]
ENSMUSG00000092386	Gm20536	0.297548301	0.164079777	1	up	no	34.54762133	28.09047933	629	657	598	620	672	509	33.788288	36.224487	33.630089	26.974834	31.934549	25.362055	predicted gene 20536 [Source:MGI Symbol;Acc:MGI:5142001]
ENSMUSG00000028920	Fbxo42	0.297460407	0.064794491	0.922232153	up	no	7.474621097	6.063344	2033	2116	1809	1982	1959	1735	7.475421292	7.982607	6.965835	5.903795	6.36929	5.916947	F-box only protein 42 [Source:UniProtKB/Swiss-Prot;Acc:Q6PDJ6]
ENSMUSG00000089821	Efhd1os	0.297377297	0.372402633	1	up	no	12.07194167	9.804678333	135	183	219	170	209	136	8.857751	12.321438	15.036636	9.030996	12.13395	8.249089	EF hand domain containing 1, opposite strand [Source:MGI Symbol;Acc:MGI:4413444]
ENSMUSG00000046139	Patl1	0.29720604	0.098848074	1	up	no	6.209524	5.034860667	1173	1246	1100	1170	1192	993	6.064773	6.609463	5.954336	4.899396	5.445766	4.75942	1 [Source:UniProtKB/Swiss-Prot;Acc:Q3TC46]
ENSMUSG00000044279	Crb3	0.297126842	0.519541376	1	up	no	0.761966659	0.601530206	66	42	57	38	90	26	0.902258496	0.583083545	0.800557935	0.413992946	1.081737129	0.308860543	Mus musculus crumbs family member 3 (Crb3), transcript variant 2, mRNA. [Source:RefSeq mRNA;Acc:NM_001347408]
ENSMUSG00000064350	mt-Ty	0.296992032	0.161750591	1	up	no	224.4547423	182.6758117	747	696	580	655	685	590	243.268417	232.34668	197.74913	172.843887	197.095352	178.088196	mitochondrially encoded tRNA tyrosine [Source:MGI Symbol;Acc:MGI:102470]
ENSMUSG00000111828	D830035M03Rik	0.296952992	0.502332923	1	up	no	0.913297333	0.724793333	56	35	38	39	26	54	1.171339	0.738081	0.830472	0.653559	0.480215	1.040606	RIKEN cDNA D830035M03 gene [Source:MGI Symbol;Acc:MGI:2686558]
ENSMUSG00000098905	Zfp953	0.296869173	0.384923365	1	up	no	0.192449667	0.138059	26	53	42	48	40	17	0.118974	0.253604	0.204771	0.177979	0.164436	0.071762	zinc finger protein 953 [Source:MGI Symbol;Acc:MGI:3612873]
ENSMUSG00000046157	Tmem229b	0.296867136	0.198039756	1	up	no	7.533150358	6.11352292	1750	1266	1771	2045	1557	1024	8.068945465	5.983005119	8.547500489	7.633417462	6.343191219	4.363960079	Transmembrane protein 229B [Source:UniProtKB/Swiss-Prot;Acc:Q8BFQ2]
ENSMUSG00000022449	Adamts20	0.296782203	0.205141644	1	up	no	0.852340611	0.67526818	383	316	334	293	297	366	0.925681726	0.785133463	0.846206645	0.572937558	0.633221847	0.819645136	A disintegrin and metalloproteinase with thrombospondin motifs 20 [Source:UniProtKB/Swiss-Prot;Acc:P59511]
ENSMUSG00000026640	Plxna2	0.296595396	0.033659173	0.720047489	up	no	8.346677705	6.777044153	6600	6620	6031	5874	6303	6113	8.385202184	8.629501717	8.025329214	6.045018608	7.081231609	7.204882242	Plexin-A2 [Source:UniProtKB/Swiss-Prot;Acc:P70207]
ENSMUSG00000020265	Sumo3	0.296311617	0.307593012	1	up	no	31.3535536	25.51362424	5145	5000	5257	2280	6257	5891	30.66076949	30.57764315	32.82224816	10.99736049	32.97409732	32.56941493	small ubiquitin-like modifier 3 [Source:MGI Symbol;Acc:MGI:1336201]
ENSMUSG00000085886	D030047H15Rik	0.296253856	0.488615929	1	up	no	0.352113	0.268184667	51	22	48	52	34	25	0.432446	0.193998	0.429895	0.357756	0.254835	0.191963	RIKEN cDNA D030047H15 gene [Source:MGI Symbol;Acc:MGI:3698136]
ENSMUSG00000072768	Gm10418	0.295924429	0.467937517	1	up	no	2.307169333	1.860760333	68	57	56	72	61	40	2.554774	2.176133	2.190601	2.191435	2.017325	1.373521	predicted gene 10418 [Source:MGI Symbol;Acc:MGI:3708553]
ENSMUSG00000050783	Htr1f	0.295899812	0.421947086	1	up	no	0.474768333	0.368185667	53	69	40	36	56	54	0.453994	0.608661	0.36165	0.246737	0.424022	0.433798	5-hydroxytryptamine (serotonin) receptor 1F [Source:MGI Symbol;Acc:MGI:99842]
ENSMUSG00000111079	Gm47112	0.295858	0.418106094	1	up	no	1.373685333	1.100446	84	100	99	106	105	58	1.193772	1.454898	1.472386	1.224171	1.311983	0.765184	predicted gene, 47112 [Source:MGI Symbol;Acc:MGI:6095853]
ENSMUSG00000043999	Gpr75	0.295698705	0.21261822	1	up	no	3.543454	2.868240667	478	418	497	469	379	475	3.560154	3.192023	3.878185	2.830129	2.493269	3.281324	Probable G-protein coupled receptor 75 [Source:UniProtKB/Swiss-Prot;Acc:Q6X632]
ENSMUSG00000042807	Hecw2	0.295628074	0.100794392	1	up	no	1.938445225	1.56075714	1116	1026	1228	1035	1169	982	1.878331281	1.771177397	2.165826998	1.410764081	1.738932395	1.532574945	E3 ubiquitin-protein ligase HECW2 [Source:UniProtKB/Swiss-Prot;Acc:Q6I6G8]
ENSMUSG00000020521	Rnft1	0.295453078	0.219922775	1	up	no	2.445192499	1.973864588	438	564	546	564	554	365	2.020343723	2.674497257	2.640736516	2.106363088	2.258791314	1.55643936	E3 ubiquitin-protein ligase RNFT1 [Source:UniProtKB/Swiss-Prot;Acc:Q9DCN7]
ENSMUSG00000091102	5830462I19Rik	0.295440811	0.405042715	1	up	no	1.051482333	0.838254667	214	132	135	91	158	192	1.377786	0.868489	0.908172	0.472462	0.898785	1.143517	RIKEN cDNA 5830462I19 gene [Source:MGI Symbol;Acc:MGI:3642105]
ENSMUSG00000068284	Usf3	0.295400524	0.556713905	1	up	no	2.622501404	2.118419602	574	1750	2234	434	2836	1020	0.95678534	3.000621155	3.910097717	0.586428818	4.190781458	1.57804853	upstream transcription factor family member 3 [Source:MGI Symbol;Acc:MGI:2685454]
ENSMUSG00000052397	Ezr	0.295337957	0.152474985	1	up	no	27.21273362	22.15663919	4017	4443	3564	3846	5200	2490	26.64133819	30.23669986	24.76016281	20.66226244	30.4927971	15.31485802	Ezrin [Source:UniProtKB/Swiss-Prot;Acc:P26040]
ENSMUSG00000047485	Klhl34	0.295209574	0.070045223	0.938967994	up	no	23.181852	18.873637	1918	2051	2047	1963	1880	1907	21.63419	23.733374	24.177992	17.934406	18.742018	19.944487	kelch like family member 34 [Source:HGNC Symbol;Acc:HGNC:26634]
ENSMUSG00000046562	Unc119b	0.295165201	0.081380416	0.968184837	up	no	8.227027758	6.686352796	1740	1825	1525	1774	1664	1428	8.242579502	8.872824718	7.565679054	6.811412571	6.970049254	6.277596564	unc-119 lipid binding chaperone B [Source:MGI Symbol;Acc:MGI:2147162]
ENSMUSG00000103845	Gm19026	0.295056762	0.352923843	1	up	no	0.354455667	0.270399667	64	102	51	60	80	54	0.308319	0.50206	0.252988	0.232647	0.339525	0.239027	predicted gene, 19026 [Source:MGI Symbol;Acc:MGI:5011211]
ENSMUSG00000063727	Tnfrsf11b	0.295048969	0.565560855	1	up	no	0.294026667	0.221149333	44	55	14	9	45	44	0.338014	0.432985	0.111081	0.050194	0.303847	0.309407	tumor necrosis factor receptor superfamily, member 11b (osteoprotegerin) [Source:MGI Symbol;Acc:MGI:109587]
ENSMUSG00000027806	Tsc22d2	0.29491508	0.065234911	0.924552878	up	no	3.717456358	3.011686212	1888	1949	1777	1776	1825	1734	3.660576877	3.880958122	3.610834076	2.788915519	3.127161119	3.118981998	TSC22 domain family, member 2 [Source:MGI Symbol;Acc:MGI:1919283]
ENSMUSG00000083907	Plk-ps1	0.294864762	0.526308984	1	up	no	0.53354	0.416429333	26	75	28	24	44	48	0.31757	0.936125	0.346925	0.234556	0.471377	0.543355	polo like kinase, pseudogene 1 [Source:MGI Symbol;Acc:MGI:103247]
ENSMUSG00000042589	Cux2	0.294765903	0.102457325	1	up	no	2.51347782	2.03051914	1140	1149	1119	987	1153	1082	2.46348776	2.546665378	2.530280323	1.723094678	2.201738406	2.166724337	Homeobox protein cut-like 2 [Source:UniProtKB/Swiss-Prot;Acc:P70298]
ENSMUSG00000099689	Zfp383	0.294707372	0.213858934	1	up	no	2.554886734	2.064363686	417	330	357	388	338	323	2.829779623	2.297716	2.537164579	2.133742511	2.024625688	2.034722858	zinc finger protein 383 [Source:HGNC Symbol;Acc:HGNC:18609]
ENSMUSG00000019564	Arid3a	0.294653259	0.26230297	1	up	no	0.970707596	0.77291391	231	275	221	284	218	184	0.904072601	1.103744726	0.904305459	0.897424203	0.755150152	0.666167376	AT-rich interactive domain-containing protein 3A [Source:UniProtKB/Swiss-Prot;Acc:Q62431]
ENSMUSG00000056174	Col8a2	0.294628881	0.517523131	1	up	no	3.844698734	3.116041987	886	843	594	752	1316	164	4.307412112	4.204725666	3.021958423	2.959212457	5.65269546	0.736218044	Collagen alpha-2(VIII) chain [Source:UniProtKB/Swiss-Prot;Acc:P25318]
ENSMUSG00000033671	Cep350	0.294588802	0.074067468	0.953291103	up	no	3.412522825	2.763776291	2450	2531	2584	2300	2918	1981	3.235321119	3.42874755	3.573499806	2.460140017	3.406173649	2.425015207	Centrosome-associated protein 350 [Source:UniProtKB/Swiss-Prot;Acc:E9Q309]
ENSMUSG00000109121	Gm44644	0.294321874	0.388336374	1	up	no	0.35590047	0.271766564	60	40	52	34	57	44	0.409253566	0.280461371	0.377986472	0.189946606	0.348288825	0.27706426	predicted gene 44644 [Source:MGI Symbol;Acc:MGI:5753220]
ENSMUSG00000074643	Cpne1	0.2942685	0.505745293	1	up	no	4.131753938	3.35093486	643	725	1131	641	312	1392	3.086989203	3.584408771	5.723863839	2.502463584	1.317788383	6.232552614	Copine-1 [Source:UniProtKB/Swiss-Prot;Acc:Q8C166]
ENSMUSG00000027088	Phospho2	0.294217589	0.161919586	1	up	no	4.363803559	3.540296471	946	827	775	892	656	878	4.752115995	4.261179629	4.078115054	3.623805126	2.908407605	4.088676681	Pyridoxal phosphate phosphatase PHOSPHO2 [Source:UniProtKB/Swiss-Prot;Acc:Q9D9M5]
ENSMUSG00000032309	Fbxo22	0.294175732	0.101110267	1	up	no	12.08210361	9.834970219	1369	1230	1285	1252	1176	1278	12.47996233	11.49708531	12.26926319	9.230329403	9.472618879	10.80196237	F-box only protein 22 [Source:UniProtKB/Swiss-Prot;Acc:Q78JE5]
ENSMUSG00000035376	Hacd2	0.293905383	0.070715934	0.941043657	up	no	11.60703467	9.449322667	1971	1819	1826	1945	1725	1704	11.938394	11.303579	11.579131	9.541752	9.233718	9.572498	Very-long-chain (3R)-3-hydroxyacyl-CoA dehydratase 2 [Source:UniProtKB/Swiss-Prot;Acc:Q9D3B1]
ENSMUSG00000049230	Gm9833	0.29378177	0.24166169	1	up	no	4.072262667	3.303568667	344	293	364	297	353	302	4.100347	3.576474	4.539967	2.863709	3.713615	3.333382	predicted gene 9833 [Source:MGI Symbol;Acc:MGI:3641855]
ENSMUSG00000091514	Gm17484	0.293635757	0.123271552	1	up	no	9.240985333	7.520781667	966	989	927	936	847	964	9.074612	9.532019	9.116325	7.122558	7.035709	8.404078	predicted gene, 17484 [Source:MGI Symbol;Acc:MGI:4937118]
[truncated: 14,684 more rows]
